# Supplementary material for: Total synthesis of (−)-exiguolide via an organosilane-based strategy
Source: Royal Society of Chemistry journal article supplement (doi:10.1039/c5cc02448j), 2015-01-01

# Total Synthesis of (–)-Exiguolide via An Organosilane-Based Strategy

Hongze Li,<sup>a</sup> Hengmu Xie,<sup>a</sup> Zhigao Zhang,<sup>a</sup> Yongjin Xu,<sup>a</sup> Ji Lu,<sup>a</sup> Lu Gao,<sup>a</sup> and Zhenlei Song<sup>\*a, b</sup>

<sup>a</sup> Key Laboratory of Drug-Targeting of Education Ministry and Department of Medicinal Chemistry, West China School of Pharmacy, <sup>b</sup> State Key Laboratory of Biotherapy, West China Hospital, Sichuan University, Chengdu 610041, P. R. China.

E-mail: zhenleisong@scu.edu.cn

## Supporting Information

### Table of Contents

|                                                                                  |          |
|----------------------------------------------------------------------------------|----------|
| 1. General Methods.....                                                          | S2       |
| 2. Experimental Procedures and Spectral Data of Products.....                    | S2-S27   |
| 3. Comparison of NMR Spectral Data of Isolated and Synthetic (–)-Exiguolide..... | S28-S29  |
| 4. <sup>1</sup> H and <sup>13</sup> C NMR Spectral Copies.....                   | S30-S100 |

## 1. General Methods

TLC was performed on glass-backed silica plates and visualized using UV, KMnO<sub>4</sub> stains, H<sub>3</sub>PO<sub>4</sub>·12MoO<sub>3</sub>/EtOH stains, H<sub>2</sub>SO<sub>4</sub> (conc.)/anisaldehyde/EtOH stains. Column chromatography was performed using silica gel (300-400 mesh) eluting with EtOAc/petroleum ether and diethyl ether/petroleum ether. <sup>1</sup>H NMR spectra were recorded at 400 MHz (Varian) and 600 MHz (Agilent), and <sup>13</sup>C NMR spectra were recorded at 100 MHz (Varian) and 150 MHz (Agilent) using CDCl<sub>3</sub> (except where noted) with TMS or residual solvent as standard. Infrared spectra were obtained using KCl plates on a VECTOR22. High-resolution mass spectral analyses performed High-resolution massspectral analyses performed on Waters Q-TOF Premier. CH<sub>2</sub>Cl<sub>2</sub>, DMF, HMPA, TMEDA, CH<sub>3</sub>CN, DMSO and NEt<sub>3</sub> were distilled from CaH<sub>2</sub>. Et<sub>2</sub>O and THF were distilled from sodium. All spectral data obtained for new compounds are reported here.

## 2. Experimental Procedures and Spectral Data of Products

### Synthesis of 3

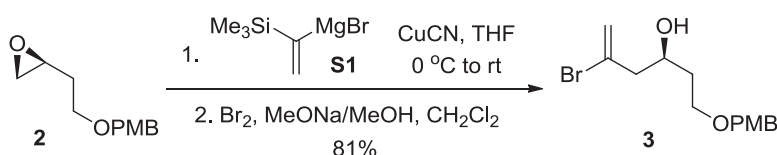

A separate two-necked flask was charged with CuCN (179 mg, 2.0 mmol), **2**<sup>1</sup> (4.16 g, 20.0 mmol) and THF (60 mL). The mixture was cooled to −30 °C before the solution of **S1**<sup>2</sup> (1.0 M in THF, 40.0 mL, 40 mmol) was added via cannula within 5 min. The resulting mixture was stirred at 0 °C for 1 h and at room temperature for 1 h. The reaction was quenched with sat aq NH<sub>4</sub>Cl (25 mL) and diluted with hexanes/EtOAc (1:1, 50 mL). The combined organic phases were dried over anhydrous Na<sub>2</sub>SO<sub>4</sub>, filtered and concentrated under reduced pressure to give the crude silyl allylic alcohol. This intermediate was used for the next step without any further purification.

To a solution of the above silyl allylic alcohol in CH<sub>2</sub>Cl<sub>2</sub> (110 mL) was added a precooled solution of Br<sub>2</sub> (1.37 mL, 26.7 mmol) in CH<sub>2</sub>Cl<sub>2</sub> (60 mL) via cannula at −78 °C within 1 min. The

1. M. J. Gaunt, A. S. Jessiman, P. Orsini, H. R. Tanner, D. F. Hook and S. V. Ley, *Org. Lett.* **2003**, 5, 4819-4822.

2. A. Fürstner, S. Flügge, O. Larionov, Y. Takahashi, T. Kubota, J. Kobayashi, *Chem. Eur. J.* **2009**, 15, 4011-4012.

resulting mixture was stirred for 5 min before a precooled solution of MeONa (5.14 g, 95.2 mmol) in MeOH (152 mL) was added via cannula within 1 min. The mixture was then allowed to stir at  $-20\text{ }^{\circ}\text{C}$  for 4 h before AcOH (104 mL) was added and stirring continued at room temperature for 2 h. After evaporation of the solvents under reduced pressure at a bath temperature of  $35\text{ }^{\circ}\text{C}$ , the residue was suspended in Sorensen buffer (0.4 M, pH 7, 532 mL) and extracted with  $\text{CH}_2\text{Cl}_2$  ( $3 \times 100\text{ mL}$ ). The combined organic layers were dried over  $\text{Na}_2\text{SO}_4$ , filtered and concentrated under reduced pressure. The residue was purified by silica gel chromatography (gradient eluent: 0-0.5% of EtOAc/petroleum ether) to afford vinyl bromide **3** (5.11 g, 81% yield) as a colorless oil;  $[\alpha]_{20}^{\text{D}} = +8.2$  (c 1.01 in  $\text{CHCl}_3$ );  $^1\text{H}$  NMR (400 MHz,  $\text{CDCl}_3$ )  $\delta$  1.75-1.79 (m, 2H), 2.50 (dd, 1H,  $J_1 = 4.4\text{ Hz}$ ,  $J_2 = 14.4\text{ Hz}$ ), 2.61 (dd, 1H,  $J_1 = 8.0\text{ Hz}$ ,  $J_2 = 14.4\text{ Hz}$ ), 3.15 (s, 1H), 3.62-3.68 (m, 1H), 3.69-3.73 (m, 1H), 3.80 (s, 3H), 4.14 (m, 1H), 4.45 (s, 2H), 5.50 (s, 1H), 5.67 (s, 1H), 6.87 (d, 2H,  $J = 8.8\text{ Hz}$ ), 7.25 (d, 2H,  $J = 8.8\text{ Hz}$ );  $^{13}\text{C}$  NMR (100 MHz,  $\text{CDCl}_3$ )  $\delta$  35.3, 49.0, 55.2, 68.4, 68.7, 72.9, 113.8, 119.2, 129.3, 129.8, 130.5, 159.2; IR (neat)  $\text{cm}^{-1}$  3435brs, 2935s, 2862s, 1613s, 1513s, 1461m, 1421m, 1363m, 1302m, 1248s, 1176m, 1091s, 1034s, 892m, 821s; HRMS (MALDI,  $m/z$ ) calcd for  $\text{C}_{14}\text{H}_{19}\text{O}_3\text{BrNa}$  ( $\text{M}+\text{Na}$ ) $^{+}$ : 337.0410, found 337.0414.

### Synthesis of 4

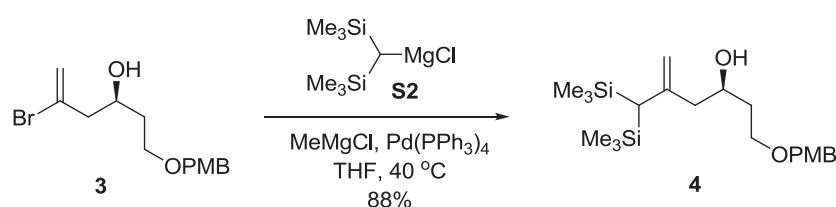

A solution of vinyl bromide **3** (2.0 g, 6.35 mmol) and MeMgCl (3.0 M in THF, 2.12 mL, 6.36 mmol) in THF (40 mL) was stirred for 5 min at  $0\text{ }^{\circ}\text{C}$  under argon followed by the addition of  $\text{Pd(PPh}_3)_4$  (369 mg, 0.32 mmol). After stirring at room temperature for 5 min, **S2**<sup>3</sup> (1.0 M in THF, 9.53 mL, 9.53 mmol) was added via cannulation. The reaction mixture was stirred for 15 min at room temperature and then heated to  $40\text{ }^{\circ}\text{C}$  for 10 h. After cooling to room temperature, the reaction was quenched with  $\text{H}_2\text{O}$  (10 mL) and extracted with  $\text{Et}_2\text{O}$  ( $3 \times 30\text{ mL}$ ). The combined organic layers were washed with sat aq NaCl, dried over  $\text{Na}_2\text{SO}_4$ , filtered and concentrated under reduced pressure.

3. D. R. Williams, Á. I. Morales-Ramos, C. M. Williams, *Org. Lett.* **2006**, 8, 4393–4396.

The residue was purified by silica gel chromatography (gradient eluent: 0-5% of EtOAc/petroleum ether) to afford **4** (2.21 g, 88% yield) as a colorless oil;  $[\alpha]_{20}^D = +3.9$  (c 1.00 in  $\text{CHCl}_3$ );  $^1\text{H}$  NMR (400 MHz,  $\text{CDCl}_3$ )  $\delta$  0.07 (s, 9H), 0.09 (s, 9H), 0.88 (s, 1H), 1.71-1.85 (m, 2H), 2.07-2.11 (m, 2H), 2.73 (d, 1H,  $J = 1.2$  Hz), 3.60-3.65 (m, 1H), 3.67-3.72 (m, 1H), 3.80 (s, 3H), 3.90-3.92 (m, 1H), 4.47 (s, 2H), 4.59 (s, 1H), 4.77 (s, 1H), 6.88 (d, 2H,  $J = 8.4$  Hz), 7.27 (d, 2H,  $J = 8.4$  Hz);  $^{13}\text{C}$  NMR (100 MHz,  $\text{CDCl}_3$ )  $\delta$  0.2, 0.3, 27.9, 36.4, 50.3, 55.1, 67.3, 68.2, 72.8, 109.2, 113.7, 129.2, 130.1, 146.9, 159.1; IR (neat)  $\text{cm}^{-1}$  3494brm, 2953s, 2909s, 2860s, 1617s, 1514s, 1462w, 1423w, 1361m, 1301m, 1249s, 1177m, 1093s, 1035s, 879s, 842s; HRMS (MALDI,  $m/z$ ) calcd for  $\text{C}_{21}\text{H}_{38}\text{O}_3\text{Si}_2\text{Na}$  ( $\text{M}+\text{Na}$ ) $^+$ : 417.2252, found 417.2250.

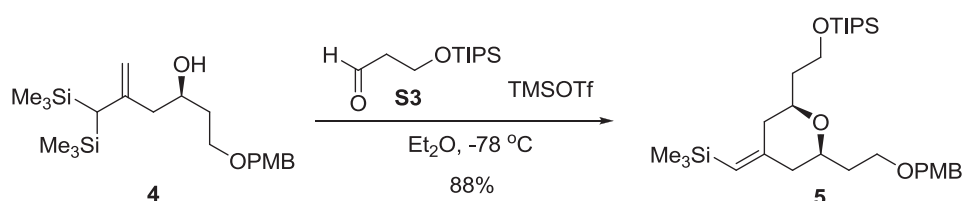

### Synthesis of 6a

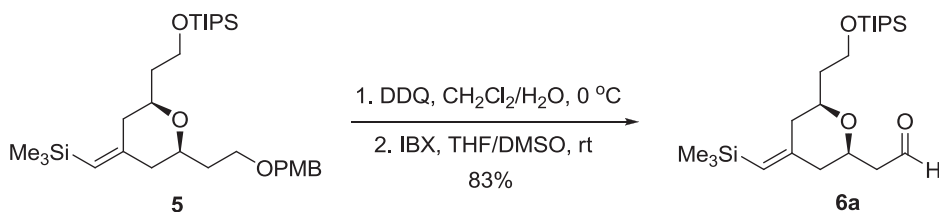

To a solution of **5** (400 mg, 0.748 mmol) in H<sub>2</sub>O/CH<sub>2</sub>Cl<sub>2</sub> (1:18, 8.44 mL) was added DDQ (204 mg, 0.897 mmol) in one portion at 0 °C. After stirring at 0 °C for 3 h, the reaction was quenched with sat aq NaHCO<sub>3</sub> (2 mL) and diluted with H<sub>2</sub>O (5 mL). The resulting mixture was stirred vigorously for 1 h before the extraction with CH<sub>2</sub>Cl<sub>2</sub> (3 × 10 mL). The combined organic layers were washed with sat aq NaCl, dried over anhydrous Na<sub>2</sub>SO<sub>4</sub>, filtered and concentrated under reduced pressure. The residue was purified by silica gel chromatography (gradient eluent: 0-10% of EtOAc/petroleum ether) to afford the alcohol (285 mg, 92% yield) as a colorless oil.

To a solution of the above alcohol (230 mg, 0.555 mmol) in THF/DMSO (3:1, 4 mL) was added IBX (342 mg, 1.221 mmol) portion-wise at 0 °C. The reaction was warmed to room temperature over 30 min before quenching with sat aq NaHCO<sub>3</sub> (1 mL)/sat aq Na<sub>2</sub>S<sub>2</sub>O<sub>3</sub> (1 mL) and extraction with Et<sub>2</sub>O (3 × 10 mL). The combined organic layers were washed with sat aq NaCl, dried over anhydrous Na<sub>2</sub>SO<sub>4</sub>, filtered and concentrated under reduced pressure. The residue was purified by silica gel chromatography (gradient eluent: 0-3% of EtOAc/petroleum ether) to afford aldehyde **6a** (206 mg, 90% yield) as a colorless oil.  $[\alpha]_{20}^D = -4.2$  (c 0.85 in CHCl<sub>3</sub>); <sup>1</sup>H NMR (400 MHz, CDCl<sub>3</sub>) δ 0.09 (s, 9H), 1.05 (d, 18H, *J* = 4.4 Hz), 1.07-1.13 (m, 3H), 1.67-1.79 (m, 2H), 1.93 (t, 1H, *J* = 12.4 Hz), 2.12 (t, 1H, *J* = 12.4 Hz), 2.21(dm, 1H, *J* = 12.8 Hz), 2.43 (dm, 1H, *J* = 13.2 Hz), 2.49 (ddd, 1H, *J*<sub>1</sub> = 2.0 Hz, *J*<sub>2</sub> = 4.8 Hz, *J*<sub>3</sub> = 16.4 Hz), 2.60 (ddd, 1H, *J*<sub>1</sub> = 2.8 Hz, *J*<sub>2</sub> = 8.0 Hz, *J*<sub>3</sub> = 16.0 Hz), 3.49-3.56 (m, 1H), 3.73-3.81 (m, 2H), 3.82-3.88 (m, 1H), 5.27 (s, 1H), 9.78 (t, 1H, *J* = 2.4 Hz); <sup>13</sup>C NMR (100 MHz, CDCl<sub>3</sub>) δ 0.2, 11.9, 18.0, 39.6, 40.0, 45.3, 49.7, 59.4, 73.7, 75.2, 123.8, 152.7, 201.2; IR (neat) cm<sup>-1</sup> 2948s, 2894s, 2867s, 2724w, 1730s, 1624m, 1464m, 1249m, 1099s, 883m, 842s; HRMS (MALDI, *m/z*) calcd for C<sub>22</sub>H<sub>44</sub>O<sub>3</sub>Si<sub>2</sub>Na (M+Na)<sup>+</sup>: 435.2721, found 435.2722.

### Synthesis of 6b

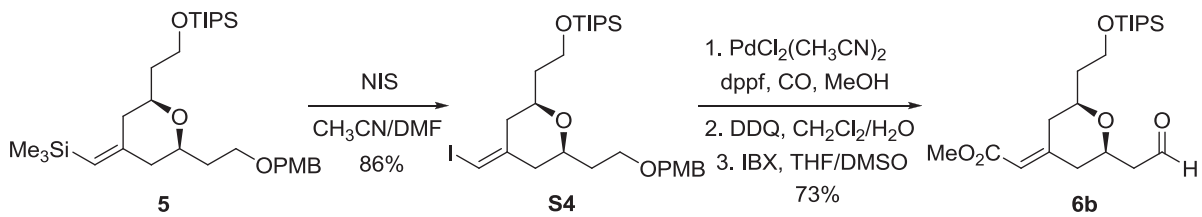

To a solution of **5** (1.48 g, 2.77 mmol) in CH<sub>3</sub>CN/DMF (1:1, 32 mL) protected from light was added NIS (1.56 g, 6.93 mmol) at 0 °C. After stirring at 0 °C for 1.5 h, the reaction was quenched with sat aq Na<sub>2</sub>S<sub>2</sub>O<sub>3</sub> (5 mL) and extracted with Et<sub>2</sub>O (3 × 15 mL). The combined organic layers were washed with sat aq NaCl, dried over Na<sub>2</sub>SO<sub>4</sub>, filtered and concentrated under reduced pressure. The residue was purified by silica gel chromatography (gradient eluent: 0-2% of EtOAc/petroleum ether) to afford vinyl iodide **S4** (1.40 g, 86% yield) as a colorless oil.  $[\alpha]_{20}^D = -38.6$  (c 1.01 in CHCl<sub>3</sub>); <sup>1</sup>H NMR (400 MHz, CDCl<sub>3</sub>) δ 1.06 (d, 18H, *J* = 4.4 Hz), 1.07-1.12 (m, 3H), 1.70-1.87 (m, 5H), 2.00 (t, 1H, *J* = 12.4 Hz), 2.38 (d, 1H, *J* = 13.6 Hz), 2.67 (d, 2H, *J* = 13.6 Hz), 3.38-3.45 (m, 2H), 3.55 (t, 2H, *J* = 6.4 Hz), 3.80 (s, 3H), 3.81-3.83 (m, 2H), 4.39 (d, 1H, *J* = 11.6 Hz), 4.43 (d, 1H, *J* = 11.6 Hz), 5.89 (s, 1H), 6.87 (d, 2H, *J* = 8.4 Hz), 7.24 (d, 2H, *J* = 8.4 Hz); <sup>13</sup>C NMR (100 MHz, CDCl<sub>3</sub>) δ 11.9, 18.1, 35.9, 39.5, 41.7, 43.0, 55.2, 59.6, 66.5, 72.7, 73.2, 74.0, 74.9, 113.7, 129.2, 130.5, 146.6, 159.1; IR (neat) cm<sup>-1</sup> 3057w, 2943s, 2864s, 1730m, 1614m, 1513m, 1463m, 1364m, 1299m, 1248s, 1174m, 1098s, 1038m, 883m, 818m; HRMS (MALDI, m/z) calcd for C<sub>27</sub>H<sub>45</sub>IO<sub>4</sub>SiNa (M+Na)<sup>+</sup>: 611.2024, found 611.2025.

To a solution of DMF/MeOH/Et<sub>3</sub>N (4:2:0.06, 23 mL) degassed via freeze-pump-thaw technique were sequentially added **S4** (370 mg, 0.629 mmol), PdCl<sub>2</sub>(CH<sub>3</sub>CN)<sub>2</sub> (24 mg, 0.094 mmol) and dppf (157 mg, 0.283 mmol). The resulting solution was stirred vigorously under CO (1 atm) at 80 °C for 5 h. The reaction was quenched with sat aq NaCl/H<sub>2</sub>O (1:1, 20 mL) and extracted with Et<sub>2</sub>O (3 × 10 mL). The combined organic layers were dried over Na<sub>2</sub>SO<sub>4</sub>, filtered and concentrated under reduced pressure. The residue was purified by silica gel chromatography (gradient eluent: 0-8% of EtOAc/petroleum ether) to afford the enoate (305 mg, 93% yield) as a colorless oil.

To a solution of the above enoate (305 mg, 0.586 mmol) in H<sub>2</sub>O/CH<sub>2</sub>Cl<sub>2</sub> (1:18, 6.33 mL) was added DDQ (160 mg, 0.703 mmol) in one portion at 0 °C. After stirring at 0 °C for 3 h, the reaction was quenched with sat aq NaHCO<sub>3</sub> (2 mL) and diluted with H<sub>2</sub>O (4 mL). The resulting mixture was stirred vigorously for 1 h before the extraction with CH<sub>2</sub>Cl<sub>2</sub> (3 × 8 mL). The combined organic

layers were washed with sat aq NaCl, dried over anhydrous Na<sub>2</sub>SO<sub>4</sub>, filtered and concentrated under reduced pressure. The residue was purified by column chromatography (gradient eluent: 15% of EtOAc/petroleum ether) to afford the alcohol (211 mg, 90% yield) as a colorless oil.

To a solution of the above alcohol (204 mg, 0.509 mmol) in THF/DMSO (3:1, 4 mL) was added IBX (314 mg, 1.12 mmol) portion-wise at 0 °C. The reaction was warmed to room temperature over 30 min before quenching with sat aq NaHCO<sub>3</sub> (1 mL)/sat aq Na<sub>2</sub>S<sub>2</sub>O<sub>3</sub> (1 mL) and extraction with Et<sub>2</sub>O (3 × 10 mL). The combined organic layers were washed with sat aq NaCl, dried over anhydrous Na<sub>2</sub>SO<sub>4</sub>, filtered and concentrated under reduced pressure. The residue was purified by silica gel chromatography (gradient eluent: 0-13% of EtOAc/petroleum ether) to afford aldehyde **6b** (177 mg, 87% yield) as a colorless oil.  $[\alpha]_{20}^D = -26.1$  (c 0.95 in CHCl<sub>3</sub>); <sup>1</sup>H NMR (400 MHz, CDCl<sub>3</sub>) δ 1.05 (d, 18H, *J* = 4.8 Hz), 1.07-1.13 (m, 3H), 1.71-1.83 (m, 2H), 1.88 (t, 1H, *J* = 12.8 Hz), 2.16 (t, 1H, *J* = 12.4 Hz), 2.28 (d, 1H, *J* = 13.2 Hz), 2.54 (ddd, 1H, *J*<sub>1</sub> = 1.6 Hz, *J*<sub>2</sub> = 4.8 Hz, *J*<sub>3</sub> = 16.4 Hz), 2.66 (ddd, 1H, *J*<sub>1</sub> = 2.4 Hz, *J*<sub>2</sub> = 7.6 Hz, *J*<sub>3</sub> = 16.4 Hz), 3.54-3.60 (m, 1H), 3.70 (s, 3H), 3.74-3.87 (m, 3H), 3.88-3.93 (m, 1H), 5.71 (s, 1H), 9.78 (d, 1H, *J* = 2.0 Hz); <sup>13</sup>C NMR (100 MHz, CDCl<sub>3</sub>) δ 11.9, 18.0, 35.7, 39.4, 42.2, 49.6, 51.0, 59.3, 73.0, 74.4, 114.9, 156.2, 166.7, 200.5; IR (neat) cm<sup>-1</sup> 3435brw, 2943s, 2926s, 2865s, 2726w, 1722s, 1653m, 1464m, 1437m, 1374m, 1260m, 1224m, 1149m, 1099s, 1021m, 882m, 803s; HRMS (MALDI, *m/z*) calcd for C<sub>21</sub>H<sub>38</sub>O<sub>5</sub>SiNa (M+Na)<sup>+</sup>: 421.2381, found 421.2378.

### Synthesis of 6c

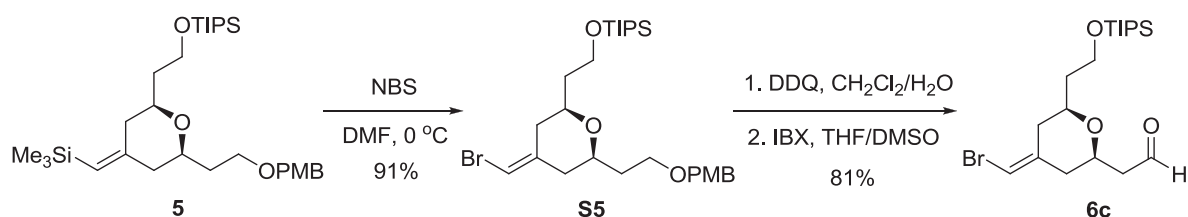

To a solution of **5** (220 mg, 0.411 mmol) in DMF (6 mL) protected from light was added NBS (366 mg, 2.055 mmol) at 0 °C. After stirring at 0 °C for 3 h, the reaction was quenched with sat aq Na<sub>2</sub>S<sub>2</sub>O<sub>3</sub> (3 mL) and extracted with Et<sub>2</sub>O (3 × 5 mL). The combined organic layers were washed with sat aq NaCl, dried over anhydrous Na<sub>2</sub>SO<sub>4</sub>, filtered and concentrated under reduced pressure. The residue was purified by silica gel chromatography (gradient eluent: 0-2% of EtOAc/petroleum

ether) to afford vinyl bromide **S5** (203 mg, 91% yield).

To a solution of **S5** (200 mg, 0.369 mmol) in H<sub>2</sub>O/CH<sub>2</sub>Cl<sub>2</sub> (1:18, 4.22 mL) was added DDQ (100 mg, 0.443 mmol) in one portion at 0 °C. After stirring at 0 °C for 3 h, the reaction was quenched with sat aq NaHCO<sub>3</sub> (1 mL) and diluted with H<sub>2</sub>O (2 mL). The resulting mixture was stirred vigorously for 1 h before the extraction with CH<sub>2</sub>Cl<sub>2</sub> (3 × 5 mL). The combined organic layers were washed with sat aq NaCl, dried over anhydrous Na<sub>2</sub>SO<sub>4</sub>, filtered and concentrated under reduced pressure. The residue was purified by silica gel chromatography (gradient eluent: 0-10% of EtOAc/petroleum ether) to afford the alcohol (143 mg, 92% yield) as a colorless oil.

To a solution of the above alcohol (140 mg, 0.333 mmol) in THF/DMSO (3:1, 4 mL) was added IBX (205 mg, 0.733 mmol) portion-wise at 0 °C. The reaction was warmed to room temperature over 30 min before quenching with sat aq NaHCO<sub>3</sub> (1 mL)/sat aq Na<sub>2</sub>S<sub>2</sub>O<sub>3</sub> (1 mL) and extraction with Et<sub>2</sub>O (3 × 10 mL). The combined organic layers were washed with sat aq NaCl, dried over anhydrous Na<sub>2</sub>SO<sub>4</sub>, filtered and concentrated under reduced pressure. The residue was purified by silica gel chromatography (gradient eluent: 0-4% of EtOAc/petroleum ether) to afford aldehyde **6c** (123 mg, 88% yield) as a colorless oil.  $[\alpha]_{20}^D = -23.8$  (c 0.90 in CHCl<sub>3</sub>); <sup>1</sup>H NMR (400 MHz, CDCl<sub>3</sub>) δ 1.05 (d, 18H, *J* = 4.8 Hz), 1.07-1.13 (m, 3H), 1.73-1.80 (m, 3H), 2.01 (t, 1H, *J* = 12.8 Hz), 2.36 (dm, 1H, *J* = 13.6 Hz), 2.52 (ddd, 1H, *J*<sub>1</sub> = 2.0 Hz, *J*<sub>2</sub> = 5.2 Hz, *J*<sub>3</sub> = 16.4 Hz), 2.64 (ddd, 1H, *J*<sub>1</sub> = 2.8 Hz, *J*<sub>2</sub> = 7.6 Hz, *J*<sub>3</sub> = 16.4 Hz), 2.86 (dm, 1H, *J* = 14.0 Hz), 3.50-3.57 (m, 1H), 3.76-3.85 (m, 3H), 6.01 (s, 1H), 9.78 (t, 1H, *J* = 2.0 Hz); <sup>13</sup>C NMR (100 MHz, CDCl<sub>3</sub>) δ 11.9, 18.0, 36.7, 39.3, 40.5, 49.3, 59.3, 72.8, 74.1, 100.5, 139.4, 200.6; IR (neat) cm<sup>-1</sup> 2940s, 2865s, 2726w, 1729s, 1464m, 1387w, 1364w, 1250w, 1151m, 1101s, 998w, 883m; HRMS (MALDI, *m/z*) calcd for C<sub>19</sub>H<sub>35</sub>BrO<sub>3</sub>SiNa (M+Na)<sup>+</sup>: 441.1431, found 441.1432.

### Synthesis of 6d

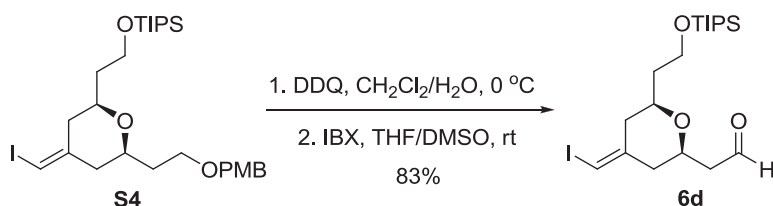

To a solution of vinyl iodide **S4** (1.43 g, 2.43 mmol) in H<sub>2</sub>O/CH<sub>2</sub>Cl<sub>2</sub> (1/18, 19.0 mL) was added

DDQ (0.66 g, 2.92 mmol) in one portion at 0 °C. After stirring at 0 °C for 3 h, the reaction was quenched with sat aq NaHCO<sub>3</sub> (5 mL) and diluted with H<sub>2</sub>O (5 mL). The resulting mixture was stirred vigorously for 1 h before the extraction with CH<sub>2</sub>Cl<sub>2</sub> (3 × 15 mL). The combined organic layers were washed with sat aq NaCl, dried over anhydrous Na<sub>2</sub>SO<sub>4</sub>, filtered and concentrated under reduced pressure. The residue was purified by silica gel chromatography (gradient eluent: 0-15% of EtOAc/petroleum ether) to afford the alcohol (1.05 g, 92% yield) as a yellow oil.

To a solution of the above alcohol (1.04 g, 2.21 mmol) in THF/DMSO (3:1, 16 mL) was added IBX (1.36 g, 4.86 mmol) portion-wise at 0 °C. The reaction was warmed to room temperature over 30 min before quenching with sat aq NaHCO<sub>3</sub> (5 mL)/sat aq Na<sub>2</sub>S<sub>2</sub>O<sub>3</sub> (5 mL) and extraction with Et<sub>2</sub>O (3 × 25 mL). The combined organic layers were washed with sat aq NaCl, dried over anhydrous Na<sub>2</sub>SO<sub>4</sub>, filtered and concentrated under reduced pressure. The residue was purified by silica gel chromatography (gradient eluent: 0-2% of EtOAc/petroleum ether) to afford aldehyde **6d** (927 mg, 90% yield) as a colorless oil.  $[\alpha]_D^{20} = -34.7$  (c 0.51 in CHCl<sub>3</sub>); <sup>1</sup>H NMR (400 MHz, CDCl<sub>3</sub>) δ 1.06 (d, 18H, *J* = 4.4 Hz), 1.07-1.13 (m, 3H), 1.75-1.80 (m, 2H), 1.85 (t, 1H, *J* = 12.4 Hz), 2.07 (t, 1H, *J* = 12.4 Hz), 2.48 (dm, 1H, *J* = 13.2 Hz), 2.52 (ddd, 1H, *J*<sub>1</sub> = 1.6 Hz, *J*<sub>2</sub> = 4.8 Hz, *J*<sub>3</sub> = 16.4 Hz), 2.64 (ddd, 1H, *J*<sub>1</sub> = 2.4 Hz, *J*<sub>2</sub> = 7.6 Hz, *J*<sub>3</sub> = 16.4 Hz), 2.71 (dm, 1H, *J* = 14.0 Hz), 3.50-3.56 (m, 1H), 3.75-3.84 (m, 3H), 6.00 (s, 1H), 9.77 (dd, 1H, *J*<sub>1</sub> = 2.0 Hz, *J*<sub>2</sub> = 2.4 Hz); <sup>13</sup>C NMR (100 MHz, CDCl<sub>3</sub>) δ 11.9, 18.0, 39.2, 41.3, 42.5, 49.1, 59.3, 72.8, 74.2, 74.3, 145.4, 200.6; IR (neat) cm<sup>-1</sup> 2941s, 2924s, 2865s, 2725w, 1728s, 1464m, 1264m, 1135m, 1100s, 1015m, 883m; HRMS (MALDI, *m/z*) calcd for C<sub>19</sub>H<sub>35</sub>IO<sub>3</sub>SiNa (M+Na)<sup>+</sup>: 489.1292, found 489.1294.

### Synthesis of 7

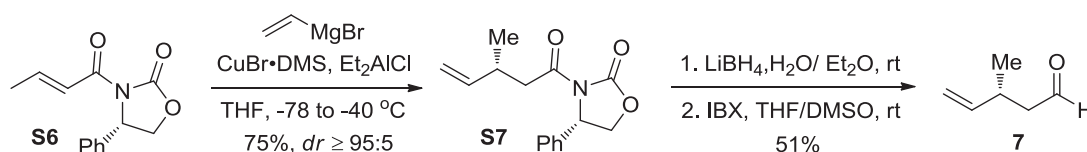

To a solution of CuBr·DMS (2.06 g, 10 mmol) in anhydrous THF (40 mL) was added vinylmagnesium bromide (1.0 M in THF, 20 mL, 20 mmol) under Ar at -78 °C. The mixture was warmed to -40 °C and stirred for 1 h before recooling to -78 °C. Et<sub>2</sub>AlCl (1.0 M in CH<sub>2</sub>Cl<sub>2</sub>, 20 mL, 20 mmol) and a solution of **S6** (2.31 g, 10 mmol) in anhydrous THF (10 mL) were added

sequentially with stirring at  $-78\text{ }^{\circ}\text{C}$  for 4 h. The reaction was quenched with sat aq  $\text{NH}_4\text{Cl}$  (10 mL) and extracted with  $\text{Et}_2\text{O}$  ( $3 \times 20\text{ mL}$ ). The combined organic layers were dried over anhydrous  $\text{Na}_2\text{SO}_4$ , filtered and concentrated under reduced pressure. The residue was purified by silica gel chromatography (gradient eluent: 0-2% of  $\text{EtOAc}$ /petroleum ether) to afford **S7** (1.94 g, 75% yield, mp  $83\text{--}85\text{ }^{\circ}\text{C}$ ) as a white solid.  $[\alpha]_{20}^{\text{D}} = +49.0$  (c 1.04 in  $\text{CHCl}_3$ );  $^1\text{H}$  NMR (400 MHz,  $\text{CDCl}_3$ )  $\delta$  1.01 (d, 3H,  $J = 6.8\text{ Hz}$ ), 2.67-2.74 (m, 1H), 2.83 (dd, 1H,  $J_1 = 7.6\text{ Hz}$ ,  $J_2 = 15.6\text{ Hz}$ ), 3.08 (dd, 1H,  $J_1 = 6.4\text{ Hz}$ ,  $J_2 = 15.6\text{ Hz}$ ), 4.25 (dd, 1H,  $J_1 = 3.6\text{ Hz}$ ,  $J_2 = 8.8\text{ Hz}$ ), 4.67 (t, 1H,  $J = 8.8\text{ Hz}$ ), 4.89 (d, 1H,  $J = 10.4\text{ Hz}$ ), 4.94 (d, 1H,  $J = 17.6\text{ Hz}$ ), 5.42 (dd, 1H,  $J_1 = 3.6\text{ Hz}$ ,  $J_2 = 8.4\text{ Hz}$ ), 5.76 (ddd, 1H,  $J_1 = 7.2\text{ Hz}$ ,  $J_2 = 10.4\text{ Hz}$ ,  $J_3 = 17.6\text{ Hz}$ ), 7.28-7.29 (d, 2H,  $J = 6.8\text{ Hz}$ ), 7.32-7.39 (m, 3H);  $^{13}\text{C}$  NMR (100 MHz,  $\text{CDCl}_3$ )  $\delta$  19.5, 33.7, 41.7, 57.5, 69.8, 113.3, 125.9, 128.6, 129.0, 139.0, 142.3, 153.6, 171.4; IR (neat)  $\text{cm}^{-1}$  3544w, 3390w, 3073w, 2965s, 2922s, 1778s, 1705s, 1642m, 1457m, 1385s, 1325s, 1201s, 918s, 762s; HRMS (MALDI,  $m/z$ ) calcd for  $\text{C}_{15}\text{H}_{17}\text{NO}_3\text{Na}$  ( $\text{M}+\text{Na}$ ) $^{+}$ : 282.1101, found 282.1105.

To a solution of **S7** (7.8 g, 30 mmol) in anhydrous  $\text{Et}_2\text{O}$  (50 mL) was added  $\text{LiBH}_4$  (2.0 M in THF, 16.7 mL, 33.5 mmol) at room temperature. The reaction was stirred for 45 min before quenching with sat aq potassium sodium tartrate (20 mL) and extraction with  $\text{Et}_2\text{O}$  ( $3 \times 30\text{ mL}$ ). The combined organic layers were dried over anhydrous  $\text{Na}_2\text{SO}_4$ , filtered and concentrated under reduced pressure. The residue was purified by silica gel chromatography (gradient eluent: 0-2% of diethyl ether/petroleum ether) to afford the alcohol (2.55 g, 85% yield) as a colorless oil.

To a solution of the above alcohol (2.55 g, 25.5 mmol) in THF/DMSO (3:1, 80 mL) was added IBX (10.7 g, 38.2 mmol) portion-wise at  $0\text{ }^{\circ}\text{C}$ . The reaction was warmed to room temperature over 2 h before quenching with sat aq  $\text{NaHCO}_3$  (15 mL)/sat aq  $\text{Na}_2\text{S}_2\text{O}_3$  (15 mL) and extraction with  $\text{Et}_2\text{O}$  ( $3 \times 40\text{ mL}$ ). The combined organic layers were dried over anhydrous  $\text{Na}_2\text{SO}_4$ , filtered and evaporated at 1 atmosphere using Vigreux column to give aldehyde **7** (1.502 g, 60% yield, bp  $63\text{--}65\text{ }^{\circ}\text{C}$ , contaminated ( $^1\text{H}$  NMR) with 30 mol % of THF) as a clear oil.  $[\alpha]_{20}^{\text{D}} = -25.2$  (c 0.5 in  $\text{CHCl}_3$ );  $^1\text{H}$  NMR (400 MHz,  $\text{CDCl}_3$ )  $\delta$  1.09 (d, 3H,  $J = 6.8\text{ Hz}$ ), 2.38 (ddd, 1H,  $J_1 = 2.0\text{ Hz}$ ,  $J_2 = 6.8\text{ Hz}$ ,  $J_3 = 16.0\text{ Hz}$ ), 2.47 (ddd, 1H,  $J_1 = 2.0\text{ Hz}$ ,  $J_2 = 6.8\text{ Hz}$ ,  $J_3 = 16.4\text{ Hz}$ ), 2.74-2.81 (m, 1H), 5.00 (d, 1H,  $J = 10.4\text{ Hz}$ ), 5.04 (d, 1H,  $J = 17.6\text{ Hz}$ ), 5.79 (ddd, 1H,  $J_1 = 7.2\text{ Hz}$ ,  $J_2 = 10.4\text{ Hz}$ ,  $J_3 = 17.6\text{ Hz}$ ), 9.74 (t, 1H,  $J = 2.0\text{ Hz}$ );  $^{13}\text{C}$  NMR (100 MHz,  $\text{CDCl}_3$ )  $\delta$  19.9, 32.2, 49.8, 113.6, 142.2, 202.3; IR (neat)  $\text{cm}^{-1}$  3400brm, 3080w, 2965s, 2931s, 2876s, 2723w, 1725s, 1642w, 1457w, 1416m,

1374w, 1002s, 916s; HRMS (MALDI,  $m/z$ ) calcd for  $C_6H_{10}ONa$  ( $M+Na$ )<sup>+</sup>: 121.0624, found 121.0627.

### Synthesis of **9**

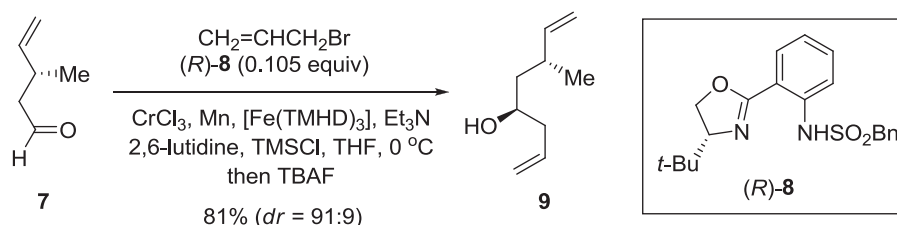

To a mixture of  $(R)\text{-}\mathbf{8}$ <sup>4</sup> (80 mg, 0.214 mmol), anhydrous  $CrCl_3$  (32 mg, 0.204 mmol), Mn (336 mg, 6.114 mmol) and  $[Fe(TMHD)_3]$  (25 mg, 0.04 mmol) in anhydrous THF (5 mL) was added  $Et_3N$  (368  $\mu L$ , 2.65 mmol) at room temperature. The reaction was stirred vigorously for 1.5 h before adding 2,6-lutidine (521  $\mu L$ , 4.5 mmol) and allyl bromide (431  $\mu L$ , 5.1 mmol). After stirring for 15 min at room temperature and for 10 min at 0  $^\circ C$ , aldehyde **7** (250 mg, 2.04 mmol, contaminated by 30 mol % of THF) and TMSCl (773  $\mu L$ , 6.11 mmol) were added sequentially with stirring for 18 h at 0  $^\circ C$ . The mixture was diluted with  $Et_2O$  (10 mL) and filtered through  $SiO_2$  plug (eluted with  $Et_2O$ ). The filtrate was concentrated under reduced pressure to give the TMS-protected homoallylic alcohol **9**. To a solution of this crude product in THF (5 mL) was added TBAF (1.0 M in THF, 2 mL, 2 mmol). The reaction was stirred for 10 min before quenching with  $H_2O$  (5 mL) and extraction with  $Et_2O$  ( $3 \times 10$  mL). The combined organic layers were dried over anhydrous  $Na_2SO_4$ , filtered and concentrated under reduced pressure. The residue was purified by silica gel chromatography (gradient eluent: 2% of diethyl ether/petroleum ether) to afford **9** (230 mg, 81%,  $dr = 91:9$ ) as a colorless oil.  $[\alpha]_D^{20} = -18.8$  (c 1.01 in  $CHCl_3$ );  $^1H$  NMR (400 MHz,  $CDCl_3$ )  $\delta$  1.03 (d, 3H,  $J = 6.8$  Hz), 1.35-1.50 (m, 2H), 1.63 (d, 1H,  $J = 3.6$  Hz), 2.12-2.19 (m, 1H), 2.23-2.30 (m, 1H), 2.41-2.44 (m, 1H), 3.66-3.70 (m, 1H), 4.97 (dd, 1H,  $J_1 = 1.2$  Hz,  $J_2 = 10.4$  Hz), 5.04 (d, 1H, 17.2 Hz), 5.12 (d, 1H,  $J = 11.6$  Hz), 5.13 (d, 1H,  $J = 15.6$  Hz), 5.67 (ddd, 1H,  $J_1 = 8.4$  Hz,  $J_2 = 10.4$  Hz,  $J_3 = 17.2$  Hz), 5.82 (dddd, 1H,  $J_1 = 7.6$  Hz,  $J_2 = 9.6$  Hz,  $J_3 = 11.2$  Hz,  $J_4 = 15.6$  Hz);  $^{13}C$  NMR (100 MHz,  $CDCl_3$ )  $\delta$  21.2, 34.7, 42.4, 43.6, 68.5, 113.5, 118.0, 134.8, 144.0; IR (neat)  $cm^{-1}$  3349brs, 3077m, 2959s, 2923s, 1641m, 1262m, 1025m, 995s, 913s, 807w; HRMS (MALDI,  $m/z$ ) calcd for  $C_9H_{16}ONa$

4. M. Kurosu, M. H. Lin, Y. Kishi, *J. Am. Chem. Soc.* **2004**, 126, 12248-12249.

(M+Na)<sup>+</sup>: 163.1093, found 163.1094.

### Synthesis of 11

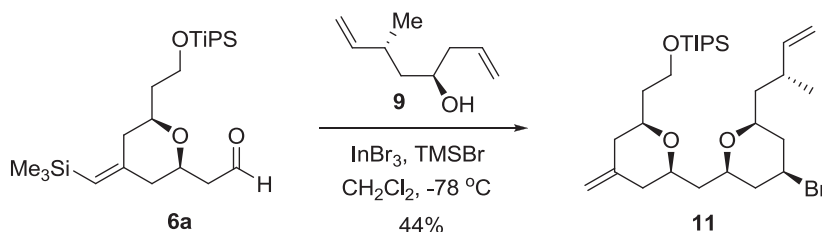

To a solution of **9** (25 mg, 0.18 mmol) and  $\text{InBr}_3$  (11 mg, 0.03 mmol) in  $\text{CH}_2\text{Cl}_2$  (2 mL) were added sequentially trimethylsilylbromide (24  $\mu\text{L}$ , 0.18 mmol) and aldehyde **6a** (55 mg, 0.15 mmol) in  $\text{CH}_2\text{Cl}_2$  (0.5 mL) at  $-78^\circ\text{C}$ . The reaction mixture was stirred for 5 h at  $-78^\circ\text{C}$  before quenching with sat aq  $\text{Na}_2\text{CO}_3$  (1 mL) and extraction with  $\text{Et}_2\text{O}$  ( $3 \times 5$  mL). The combined organic layers were washed sat aq  $\text{NaCl}$ , dried over anhydrous  $\text{Na}_2\text{SO}_4$ , filtered and concentrated under reduced pressure. The residual crude product was purified via silica gel chromatography (0-1% of diethyl ether/petroleum ether) to afford **11** (36 mg, 44% yield) as colorless oil.  $[\alpha]_{20}^{\text{D}} = -2.1$  (c 0.35 in  $\text{CHCl}_3$ );  $^1\text{H}$  NMR (400 MHz,  $\text{CDCl}_3$ )  $\delta$  0.98 (d, 3H,  $J = 6.8$  Hz), 1.07 (d, 18H,  $J = 4.4$  Hz), 1.08-1.13 (m, 3H), 1.23-1.29 (m, 1H), 1.50-1.55 (m, 2H), 1.62-1.79 (m, 4H), 1.88-1.97 (m, 3H), 2.15 (dt, 1H,  $J_1 = 2.0$  Hz,  $J_2 = 12.4$  Hz), 2.23 (m, 3H), 2.39-2.41 (m, 1H), 3.28 (tm, 1H,  $J = 10.4$  Hz), 3.38-3.45 (m, 3H), 3.75-3.84 (m, 2H), 4.07-4.16 (m, 1H), 4.71 (s, 1H), 4.72 (s, 1H), 4.93 (d, 1H,  $J = 10.0$  Hz), 4.96 (d, 1H,  $J = 17.2$  Hz), 5.59 (ddd, 1H,  $J_1 = 8.4$  Hz,  $J_2 = 10.4$  Hz,  $J_3 = 17.2$  Hz);  $^{13}\text{C}$  NMR (100 MHz,  $\text{CDCl}_3$ )  $\delta$  12.0, 18.0, 21.1, 34.4, 39.5, 40.4, 41.0, 42.2, 42.7, 43.3, 43.8, 46.9, 59.8, 73.9, 74.5, 75.2, 75.3, 108.5, 113.6, 143.7, 144.6; IR (neat)  $\text{cm}^{-1}$  3360brw, 3075w, 2925s, 2863s, 1652m, 1463m, 1369w, 1260w, 1099s, 998w, 886m; HRMS (MALDI,  $m/z$ ) calcd for  $\text{C}_{28}\text{H}_{51}\text{BrO}_3\text{SiNa}$  (M+Na)<sup>+</sup>: 565.2683, found 565.2684.

### Synthesis of 10b, 12b, 13 and S8

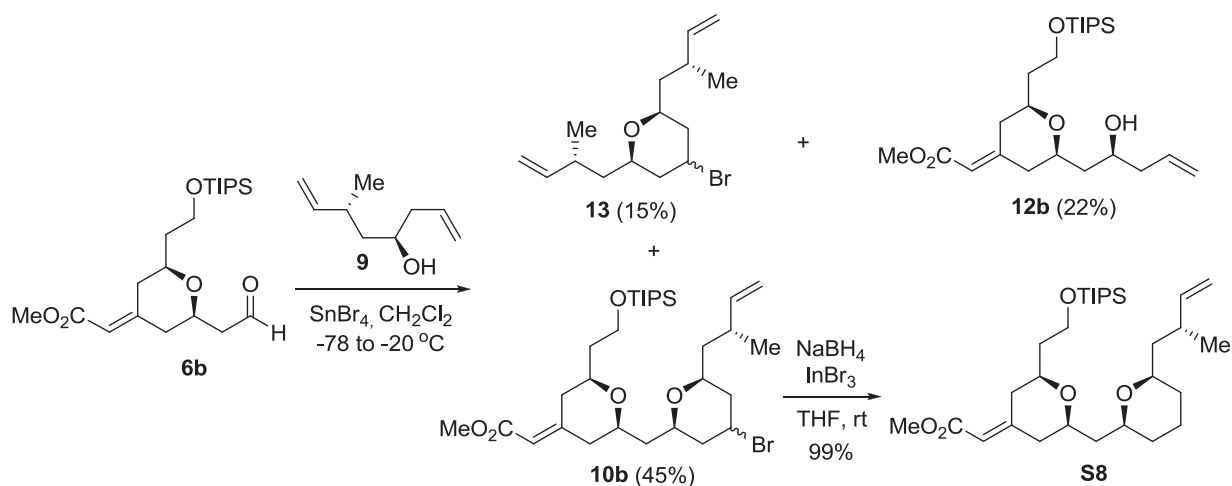

To a solution of **9** (25 mg, 0.18 mmol) and aldehyde **6b** (60 mg, 0.15 mmol) in  $\text{CH}_2\text{Cl}_2$  (2 mL) was added  $\text{SnBr}_4$  (0.33 mL, 1.0 M in  $\text{CH}_2\text{Cl}_2$ , 0.33 mmol) at  $-78$  °C under Ar. The reaction was stirred at  $-78$  °C for 2 h and at  $-20$  °C for another 2 h. The mixture was quenched with sat aq  $\text{Na}_2\text{CO}_3$  (1 mL) and extracted with  $\text{CH}_2\text{Cl}_2$  ( $3 \times 2$  mL). The combined organic layers were washed with sat aq  $\text{NaCl}$ , dried over anhydrous  $\text{Na}_2\text{SO}_4$ , filtered and concentrated under reduced pressure. The residue was purified by silica gel column chromatography (gradient eluent: 0-30% of EtOAc/petroleum ether) to afford **13** (7 mg, 15% yield,  $dr = 7:3$ ) as a colorless oil, **12b** (15 mg, 22% yield) as a colorless oil, and **10b** (41 mg, 45% yield,  $dr = 3:2$ ) as a colorless oil.

To a solution of **10b** (41 mg, 0.068 mmol) in anhydrous THF (1 mL) was added  $\text{InBr}_3$  (36 mg, 0.102 mmol) and  $\text{NaBH}_4$  (5 mg, 0.136 mmol) under Ar at room temperature. After stirring for 2 h, the mixture was quenched with  $\text{H}_2\text{O}$  (0.5 mL) and extracted with  $\text{Et}_2\text{O}$  ( $3 \times 1$  mL). The combined organic layers were washed with sat aq  $\text{NaCl}$ , dried over anhydrous  $\text{Na}_2\text{SO}_4$ , filtered and concentrated under reduced pressure. The residual crude product was purified via silica gel chromatography (0-2% of diethyl ether/petroleum ether) to afford **S8** (36 mg, 99% yield) as colorless oil.  $[\alpha]_{20}^D = -23.5$  (c 1.50 in  $\text{CHCl}_3$ );  $^1\text{H}$  NMR (400 MHz,  $\text{CDCl}_3$ )  $\delta$  0.98 (d, 3H,  $J = 6.8$  Hz), 1.05 (d, 18H,  $J = 4.4$  Hz), 1.06-1.12 (m, 3H), 1.16-1.29 (m, 3H), 1.43-1.57 (m, 5H), 1.76-1.83 (m, 3H), 1.86-1.94 (m, 2H), 2.09 (t, 1H,  $J = 12.0$  Hz), 2.25 (dm, 1H,  $J = 13.6$  Hz), 2.34-2.45 (m, 1H), 3.27 (tm, 1H,  $J = 10.8$  Hz), 3.37-3.43 (m, 1H), 3.45-3.51 (m, 1H), 3.52-3.58 (m, 1H), 3.69 (s, 3H), 3.77-3.82 (m, 3H), 4.94 (d, 1H,  $J = 10.4$  Hz), 4.95 (d, 1H,  $J = 18.4$  Hz), 5.64 (ddd, 1H,  $J_1 = 8.4$  Hz,  $J_2 = 10.4$  Hz,  $J_3 = 18.4$  Hz), 5.67 (s, 1H);  $^{13}\text{C}$  NMR (100 MHz,  $\text{CDCl}_3$ )  $\delta$  12.0, 18.0, 21.1, 23.7, 31.6, 32.0, 34.3, 36.2, 39.7, 42.4, 42.8, 43.4, 50.9, 59.7, 73.9, 74.2, 74.6, 75.5, 113.1, 114.1,

144.3, 158.0, 166.9. IR (neat)  $\text{cm}^{-1}$  3362brw, 3075w, 2959s, 2927s, 2863s, 1721s, 1650m, 1462m, 1437m, 1372m, 1263s, 1147s, 1099s, 1018s, 879m, 795s; HRMS (MALDI,  $m/z$ ) calcd for  $\text{C}_{30}\text{H}_{54}\text{O}_5\text{SiNa}$  ( $\text{M}+\text{Na}$ ) $^{+}$ : 545.3633, found 545.3635.

**12b**:  $[\alpha]_{20}^{\text{D}} = -28.9$  (c 0.28 in  $\text{CHCl}_3$ );  $^1\text{H}$  NMR (400 MHz,  $\text{CDCl}_3$ )  $\delta$  1.05 (d, 18H,  $J = 4.8$  Hz), 1.07-1.13 (m, 3H), 1.66 (t, 2H,  $J = 6.4$  Hz), 1.80 (q, 2H,  $J = 6.0$  Hz), 1.90 (tm, 1H,  $J = 12.8$  Hz), 2.13-2.29 (m, 4H), 3.43 (s, 1H), 3.58-3.66 (m, 2H), 3.69 (s, 3H), 3.77-3.83 (m, 3H), 3.87-3.93 (m, 1H), 5.09 (d, 1H,  $J = 9.2$  Hz), 5.10 (d, 1H,  $J = 18.8$  Hz), 5.67 (s, 1H), 5.82 (dddd, 1H,  $J_1 = 7.2$  Hz,  $J_2 = 10.4$  Hz,  $J_3 = 14.4$  Hz,  $J_4 = 17.2$  Hz);  $^{13}\text{C}$  NMR (150 MHz,  $\text{CDCl}_3$ )  $\delta$  11.9, 18.0, 35.7, 39.4, 41.8, 42.0, 42.9, 51.0, 59.4, 70.7, 74.7, 78.7, 114.5, 117.4, 134.8, 156.6, 166.7; IR (neat)  $\text{cm}^{-1}$  3362w, 3196w, 2923s, 2855s, 1721s, 1653s, 1464m, 1436m, 1371m, 1261m, 1149m, 1099s, 1019m, 881m, 801s; HRMS (MALDI,  $m/z$ ) calcd for  $\text{C}_{24}\text{H}_{44}\text{O}_5\text{SiNa}$  ( $\text{M}+\text{Na}$ ) $^{+}$ : 463.2850, found 463.2854.

**13 (major isomer)**:  $[\alpha]_{20}^{\text{D}} = -7.1$  (c 0.45 in  $\text{CHCl}_3$ );  $^1\text{H}$  NMR (400 MHz,  $\text{CDCl}_3$ )  $\delta$  0.99 (d, 6H,  $J = 6.8$  Hz), 1.22-1.31 (m, 1H), 1.52-1.60 (m, 2H), 1.62-1.74 (m, 3H), 2.12-2.22 (m, 2H), 2.38-2.43 (m, 2H), 3.25-3.32 (m, 2H), 4.10-4.18 (m, 1H), 4.91-5.00 (m, 4H), 5.59 (ddd, 1H,  $J_1 = 8.4$  Hz,  $J_2 = 10.4$  Hz,  $J_3 = 18.4$  Hz), 5.75 (ddd, 1H,  $J_1 = 7.2$  Hz,  $J_2 = 10.4$  Hz,  $J_3 = 17.2$  Hz);  $^{13}\text{C}$  NMR (150 MHz,  $\text{CDCl}_3$ )  $\delta$  19.1, 21.1, 33.4, 34.4, 42.3, 42.7, 43.7, 43.8, 47.1, 75.0, 75.3, 112.4, 113.6, 143.8, 144.4; IR (neat)  $\text{cm}^{-1}$  3358w, 3077w, 2958s, 2921s, 2852s, 1723w, 1639m, 1461s, 1371m, 1261s, 1151m, 1086s, 1028s, 913s, 802s; HRMS (MALDI,  $m/z$ ) calcd for  $\text{C}_{15}\text{H}_{25}\text{BrONa}$  ( $\text{M}+\text{Na}$ ) $^{+}$ : 323.0981, found 323.0984.

### Synthesis of 10c, 12c, 13 and S9

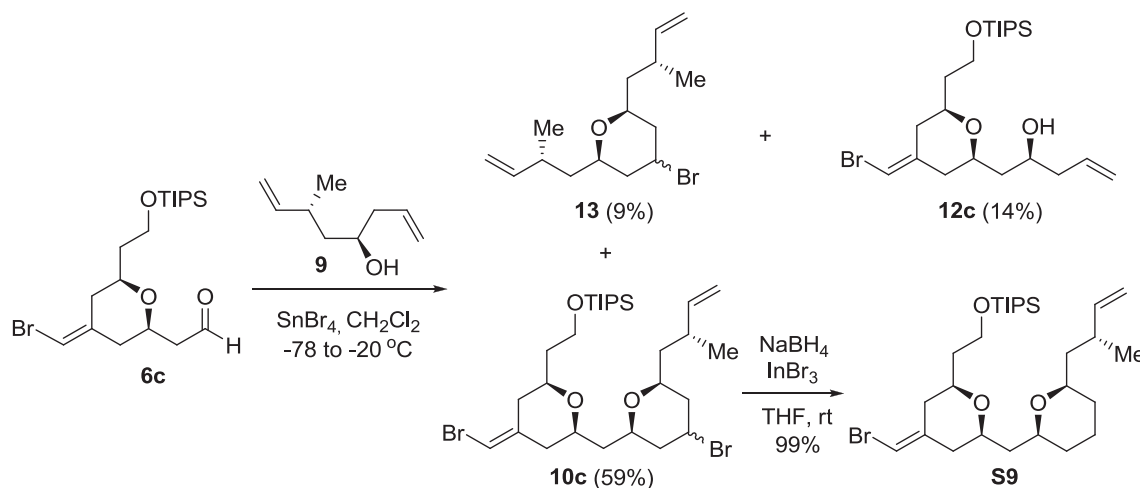

To a solution of homoallylic alcohol **9** (25 mg, 0.18 mmol) and aldehyde **6c** (63 mg, 0.15 mmol) in CH<sub>2</sub>Cl<sub>2</sub> (2 mL) was added SnBr<sub>4</sub> (0.33 mL, 1.0 M in CH<sub>2</sub>Cl<sub>2</sub>, 0.33 mmol) at –78 °C under Ar. The reaction was stirred at –78 °C for 2 h and at –20 °C for another 2 h. The mixture was quenched with sat aq Na<sub>2</sub>CO<sub>3</sub> (1 mL) and extracted with CH<sub>2</sub>Cl<sub>2</sub> (3 × 2 mL). The combined organic layers were washed with sat aq NaCl, dried over anhydrous Na<sub>2</sub>SO<sub>4</sub>, filtered and concentrated under reduced pressure. The residue was purified by silica gel column chromatography (gradient eluent: 0-20% of EtOAc/petroleum ether) to afford **13** (4 mg, 9% yield, *dr* = 6:4) as a colorless oil, **12c** (10 mg, 14% yield) as a colorless oil, and **10c** (55 mg, 59% yield, *dr* = 2:1) as a colorless oil.

To a solution of **10c** (55 mg, 0.088 mmol) in anhydrous THF (1 mL) was added InBr<sub>3</sub> (47 mg, 0.132 mmol) and NaBH<sub>4</sub> (7 mg, 0.176 mmol) under Ar at room temperature. After stirring for 2 h, the mixture was quenched with H<sub>2</sub>O (0.5 mL) and extracted with Et<sub>2</sub>O (3 × 1 mL). The combined organic layers were washed with sat aq NaCl, dried over anhydrous Na<sub>2</sub>SO<sub>4</sub>, filtered and concentrated under reduced pressure. The residual crude product was purified via silica gel chromatography (0-1% of diethyl ether/petroleum ether) to afford **S9** (47 mg, 99% yield) as a colorless oil.  $[\alpha]_{20}^D = -27.1$  (c 0.38 in CHCl<sub>3</sub>); <sup>1</sup>H NMR (400 MHz, CDCl<sub>3</sub>) δ 0.98 (d, 3H, *J* = 7.2 Hz), 1.05 (d, 18H, *J* = 4.4 Hz), 1.06-1.12 (m, 3H), 1.16-1.29 (m, 3H), 1.46-1.57 (m, 5H), 1.72-1.83 (m, 4H), 1.86-1.96 (m, 2H), 2.34 (d, 1H, *J* = 13.6 Hz), 2.36-2.43 (m, 1H), 2.82 (d, 1H, *J* = 14.0 Hz), 3.26 (t, 1H, *J* = 9.6 Hz), 3.35-3.49 (m, 3H), 3.81 (t, 2H, *J* = 6.4 Hz), 4.92 (d, 1H, *J* = 10.0 Hz), 4.94 (d, 1H, *J* = 17.6 Hz), 5.63 (ddd, 1H, *J*<sub>1</sub> = 8.0 Hz, *J*<sub>2</sub> = 10.0 Hz, *J*<sub>3</sub> = 17.2 Hz), 5.94 (s, 1H); <sup>13</sup>C NMR (150 MHz, CDCl<sub>3</sub>) δ 12.0, 18.0, 21.1, 23.7, 31.6, 32.0, 34.3, 37.1, 39.5, 40.5, 42.5, 43.4, 59.8, 73.9, 74.0, 74.4, 75.5, 99.4, 113.0, 140.7, 144.3; IR (neat) cm<sup>-1</sup> 3360w, 3073w, 2927s, 2863s, 1637w, 1462m, 1372w, 1255w, 1200w, 1097s, 912w, 883m; HRMS (MALDI, *m/z*) calcd for C<sub>28</sub>H<sub>51</sub>BrO<sub>3</sub>SiNa (M+Na)<sup>+</sup>: 565.2683, found 565.2678.

**12c**:  $[\alpha]_{20}^D = -14.0$  (c 0.25 in CHCl<sub>3</sub>); <sup>1</sup>H NMR (400 MHz, CDCl<sub>3</sub>) δ 1.05 (d, 18H, *J* = 4.8 Hz), 1.07-1.13 (m, 3H), 1.63 (t, 2H, *J* = 6.0 Hz), 1.73-1.83 (m, 3H), 2.01 (tm, 1H, *J* = 12.8 Hz), 2.17-2.28 (m, 3H), 2.86 (dm, 1H, *J* = 14.0 Hz), 3.50 (s, 1H), 3.51-3.60 (m, 2H), 3.80 (t, 1H, *J* = 5.6 Hz), 3.86-3.92 (m, 1H), 5.08 (d, 1H, *J* = 10.0 Hz), 5.09 (d, 1H, *J* = 17.6 Hz), 5.82 (dddd, 1H, *J*<sub>1</sub> = 7.2 Hz, *J*<sub>2</sub> = 10.4 Hz, *J*<sub>3</sub> = 14.4 Hz, *J*<sub>4</sub> = 17.2 Hz), 5.96 (s, 1H); <sup>13</sup>C NMR (150 MHz, CDCl<sub>3</sub>) δ 11.9, 18.0, 36.7, 39.3, 41.1, 41.7, 41.8, 59.4, 70.8, 74.5, 78.6, 100.1, 117.3, 134.8, 139.6; IR (neat) cm<sup>-1</sup> 3392w, 3190w, 2957s, 2922s, 2853s, 1736m, 1646m, 1463s, 1377w, 1261m, 1100s, 1015m, 914w,

881m, 800s; HRMS (MALDI,  $m/z$ ) calcd for  $C_{22}H_{41}BrO_3SiNa$  ( $M+Na$ )<sup>+</sup>: 483.1901, found 483.1902.

### Synthesis of 10d

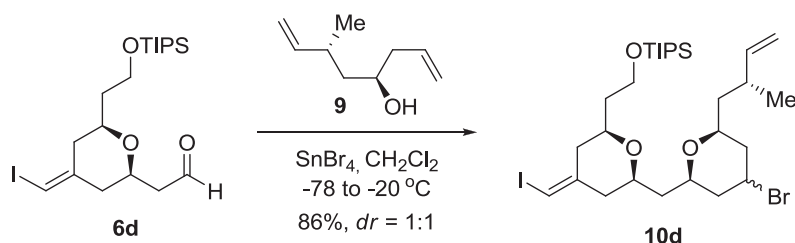

To a solution of homoallylic alcohol **9** (25 mg, 0.18 mmol) and aldehyde **6d** (70 mg, 0.15 mmol) in  $CH_2Cl_2$  (2 mL) was added  $SnBr_4$  (0.33 mL, 1.0 M in  $CH_2Cl_2$ , 0.33 mmol) at  $-78$  °C under Ar. The reaction was stirred at  $-78$  °C for 2 h and at  $-20$  °C for another 2 h. The mixture was quenched with sat aq  $Na_2CO_3$  (1 mL) and extracted with  $CH_2Cl_2$  ( $3 \times 2$  mL). The combined organic layers were washed with sat aq  $NaCl$ , dried over anhydrous  $Na_2SO_4$ , filtered and concentrated under reduced pressure. The residue was purified by silica gel column chromatography (gradient eluent: 0-20% of EtOAc/petroleum ether) to afford **10d** (86 mg, 86% yield,  $dr = 1:1$ ) as a colorless oil. **10d** ( **$\beta$ -Br isomer**):  $[\alpha]_D^{20} = -38.9$  (c 1.05 in  $CHCl_3$ );  $^1H$  NMR (400 MHz,  $CDCl_3$ )  $\delta$  0.98 (d, 3H,  $J = 6.8$  Hz), 1.07 (d, 18H,  $J = 4.4$  Hz), 1.08-1.13 (m, 3H), 1.22-1.30 (m, 1H), 1.51-1.57 (m, 2H), 1.68 (dq, 2H,  $J_1 = 4.8$  Hz,  $J_2 = 12.4$  Hz), 1.75-1.86 (m, 3H), 1.91 (dt, 1H,  $J_1 = 7.2$  Hz,  $J_2 = 14.0$  Hz), 2.01 (t, 1H,  $J = 12.0$  Hz), 2.13-2.22 (m, 2H), 2.34 (m, 1H), 2.41 (d, 1H,  $J = 13.6$  Hz), 2.68 (d, 1H,  $J = 13.6$  Hz), 3.28 (t, 1H,  $J = 10.4$  Hz), 3.38-3.47 (m, 3H), 3.82 (t, 2H,  $J = 6.0$  Hz), 4.06-4.14 (m, 1H), 4.93 (d, 1H,  $J = 12.4$  Hz), 4.94 (d, 1H,  $J = 15.2$  Hz), 5.59 (dt, 1H,  $J_1 = 8.4$  Hz,  $J_2 = 17.6$  Hz), 5.92 (s, 1H);  $^{13}C$  NMR (100 MHz,  $CDCl_3$ )  $\delta$  12.0, 18.1, 21.1, 34.4, 39.4, 41.5, 41.6, 42.5, 42.6, 43.2, 43.7, 46.6, 59.6, 73.3, 73.8, 74.0, 74.1, 75.3, 113.6, 143.7, 146.4; IR (neat)  $cm^{-1}$  3392w, 3186w, 3074w, 2945s, 2924s, 2864s, 1738w, 1644m, 1463s, 1370m, 1329m, 1264m, 1138m, 1098s, 997m, 914m, 883m; HRMS (MALDI,  $m/z$ ) calcd for  $C_{28}H_{50}BrIO_3SiNa$  ( $M+Na$ )<sup>+</sup>: 691.1649, found 691.1646; **10d** ( **$\alpha$ -Br isomer**):  $[\alpha]_D^{20} = -30.8$  (c 0.60 in  $CHCl_3$ );  $^1H$  NMR (400 MHz,  $CDCl_3$ )  $\delta$  1.00 (d, 1H,  $J = 6.8$  Hz), 1.06 (d, 18H,  $J = 4.4$  Hz), 1.07-1.13 (m, 3H), 1.22-1.31 (m, 1H), 1.48-1.56 (m, 2H), 1.67-1.94 (m, 8H), 2.01 (t, 1H,  $J = 12.4$  Hz), 2.41 (m, 1H), 2.49 (dm, 1H,  $J = 13.6$  Hz), 2.68 (dm, 1H,  $J = 13.6$  Hz), 3.43-3.51 (m, 2H), 3.78-3.88 (m, 3H), 3.91-3.97 (m, 1H), 4.71 (m, 1H), 4.97 (d, 1H,  $J = 11.2$

Hz), 4.98 (d, 1H,  $J = 16.4$  Hz), 5.66 (dt, 1H,  $J_1 = 8.0$  Hz,  $J_2 = 17.6$  Hz), 5.95 (s, 1H);  $^{13}\text{C}$  NMR (100 MHz,  $\text{CDCl}_3$ )  $\delta$  12.0, 18.1, 21.1, 34.3, 39.5, 39.7, 40.0, 41.4, 41.7, 42.4, 42.5, 50.7, 59.9, 68.6, 70.0, 73.3, 74.2, 74.3, 113.5, 143.8, 146.5; IR (neat)  $\text{cm}^{-1}$  3360w, 3190w, 3073w, 2945s, 2924s, 2863s, 1737w, 1637m, 1463s, 1375m, 1324w, 1262s, 1195w, 1097s, 1024s, 914m, 883m, 802s; HRMS (MALDI,  $m/z$ ) calcd for  $\text{C}_{28}\text{H}_{50}\text{BrIO}_3\text{SiNa}$  ( $\text{M}+\text{Na}$ ) $^+$ : 691.1649, found 691.1646.

### Synthesis of S8

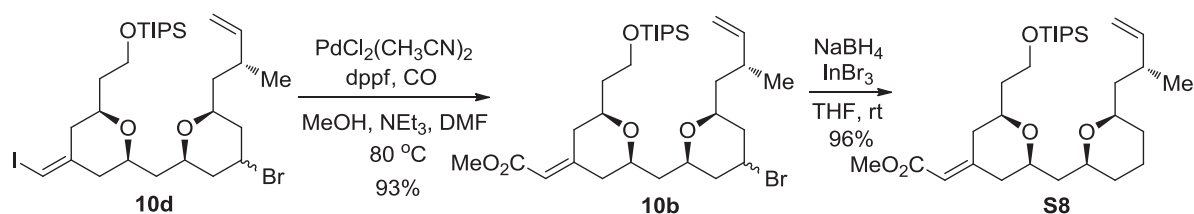

To a solution of DMF/MeOH/ $\text{Et}_3\text{N}$  (4:2:0.06, 9.09 mL) degassed via freeze-pump-thaw technique was sequentially added **10d** (191 mg, 0.284 mmol),  $\text{PdCl}_2(\text{CH}_3\text{CN})_2$  (11 mg, 0.043 mmol) and dppf (71 mg, 0.128 mmol). The resulting solution was stirred vigorously under CO (1 atm) at 80 °C for 5 h. The reaction was quenched with sat aq NaCl/ $\text{H}_2\text{O}$  (1:1, 10 mL) and extracted with  $\text{Et}_2\text{O}$  ( $3 \times 10$  mL). The combined organic layers were dried over  $\text{Na}_2\text{SO}_4$ , filtered and concentrated under reduced pressure. The residue was purified by silica gel chromatography (gradient eluent: 0-8% of EtOAc/petroleum ether) to afford **10b** (159 mg, 93% yield) as a colorless oil.

To a solution of **10b** (159 mg, 0.264 mmol) in anhydrous THF (2 mL) was added  $\text{InBr}_3$  (140 mg, 0.396 mmol) and  $\text{NaBH}_4$  (20 mg, 0.528 mmol) under Ar at room temperature. After stirring for 2 h, the mixture was quenched with  $\text{H}_2\text{O}$  (1 mL) and extracted with  $\text{Et}_2\text{O}$  ( $3 \times 2$  mL). The combined organic layers were washed with sat aq NaCl, dried over anhydrous  $\text{Na}_2\text{SO}_4$ , filtered and concentrated under reduced pressure. The residue was purified by silica gel chromatography (0-2% of diethyl ether/petroleum ether) to afford **S8** (132 mg, 96% yield) as a colorless oil.

### Synthesis of S10

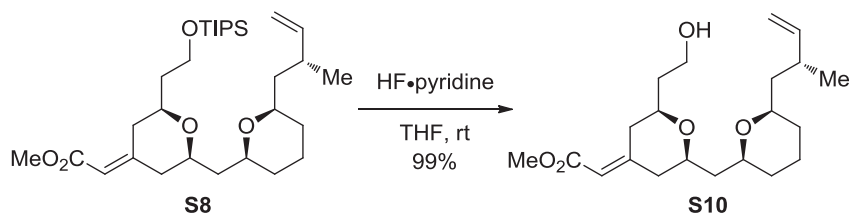

To a solution of **S8** (170 mg, 0.325 mmol) in THF (6 mL) was added HF·pyridine (1.5 mL, 70% HF) at 0 °C. The reaction was stirred at room temperature for 1 h before quenching with sat aq NaHCO<sub>3</sub> (3 mL) and extraction with Et<sub>2</sub>O (3 × 5 mL). The combined organic layers were washed with sat aq NaCl, dried over anhydrous Na<sub>2</sub>SO<sub>4</sub>, filtered and concentrated under reduced pressure. The residue was purified by silica gel chromatography (gradient eluent: 0-20% of EtOAc/petroleum ether) to afford **S10** (118 mg, 99% yield) as a colorless oil.  $[\alpha]_D^{20} = -31.0$  (c 0.55 in CHCl<sub>3</sub>); <sup>1</sup>H NMR (400 MHz, CDCl<sub>3</sub>) δ 0.99 (d, 3H, *J* = 6.8 Hz), 1.14-1.29 (m, 3H), 1.43-1.58 (m, 5H), 1.78-1.86 (m, 3H), 1.88-1.97 (m, 2H), 2.11 (t, 1H, *J* = 12.0 Hz), 2.29 (dm, 1H, *J* = 13.2 Hz), 2.33-2.44 (m, 1H), 2.67 (brs, 1H), 3.25-3.30 (tm, 1H, *J* = 10.8 Hz), 3.33-3.38 (m, 1H), 3.57-3.61 (m, 1H), 3.62-3.68 (m, 1H), 3.69 (s, 3H), 3.78-3.84 (m, 3H), 4.94 (d, 1H, *J* = 12.4 Hz), 4.95 (d, 1H, *J* = 14.8 Hz), 5.64 (dddd, 1H, *J*<sub>1</sub> = 8.0 Hz, *J*<sub>2</sub> = 9.6 Hz, *J*<sub>3</sub> = 13.2 Hz, *J*<sub>4</sub> = 17.6 Hz), 5.69 (s, 1H); <sup>13</sup>C NMR (150 MHz, CDCl<sub>3</sub>) δ 21.2, 23.6, 31.8, 31.9, 34.4, 35.9, 38.0, 41.8, 42.8, 43.3, 51.0, 61.5, 73.9, 75.3, 75.6, 78.3, 113.2, 114.5, 144.3, 157.0, 166.9; IR (neat) cm<sup>-1</sup> 3445brm, 3075w, 2925s, 2854s, 1718s, 1649s, 1437m, 1373m, 1203m, 1150m, 1088m, 912m, 863m; HRMS (MALDI, *m/z*) calcd for C<sub>21</sub>H<sub>34</sub>O<sub>5</sub>Na (M+Na)<sup>+</sup>: 389.2298, found 389.2296.

### Synthesis of 16

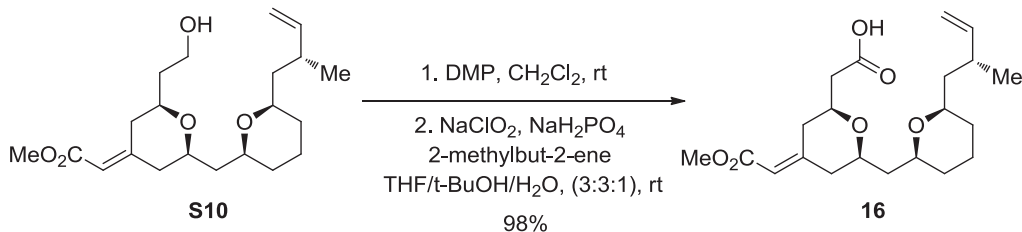

To a solution of alcohol **S10** (200 mg, 0.546 mmol) in CH<sub>2</sub>Cl<sub>2</sub> (5 mL) was added Dess-Martin periodinane (463 mg, 1.09 mmol) portion-wise at 0 °C. The reaction was warmed to room temperature over 1 h before quenching with sat aq NaHCO<sub>3</sub> (1.5 mL)/sat aq Na<sub>2</sub>S<sub>2</sub>O<sub>3</sub> (1.5 mL) and extraction with CH<sub>2</sub>Cl<sub>2</sub> (3 × 5 mL). The combined organic layers were washed with sat aq NaCl,

dried over anhydrous Na<sub>2</sub>SO<sub>4</sub>, filtered and concentrated under reduced pressure to give the crude aldehyde. This intermediate was used for the next step without any further purification.

To a solution of the above aldehyde, 2-methylbut-2-ene (2.0 mL) and NaH<sub>2</sub>PO<sub>4</sub> (228 mg, 1.9 mmol) in THF/*t*-BuOH/H<sub>2</sub>O (3:3:1, 14 mL) was added NaClO<sub>2</sub> (172 mg, 1.9 mmol) at 0 °C. The reaction was warmed to room temperature over 1 h before quenching with Na<sub>2</sub>S<sub>2</sub>O<sub>3</sub> (5 mL) and extraction with EtOAc (4 × 8 mL). The combined organic layers were dried over anhydrous Na<sub>2</sub>SO<sub>4</sub>, filtered and concentrated under reduced pressure. The residue was purified by silica gel chromatography (gradient eluent: 0-20% of EtOAc/petroleum ether) to afford acid **16** (205 mg, 98% yield) as a colorless oil.  $[\alpha]_D^{20} = -42.7$  (c 1.68 in CHCl<sub>3</sub>); <sup>1</sup>H NMR (400 MHz, CDCl<sub>3</sub>) δ 0.98 (d, 3H, *J* = 6.8 Hz), 1.15-1.29 (m, 3H), 1.43-1.58 (m, 5H), 1.78-1.81 (m, 1H), 1.91 (t, 1H, *J* = 12.4 Hz), 1.92 (t, 1H, *J* = 14.0 Hz), 2.12 (t, 1H, *J* = 12.4 Hz), 2.29 (d, 1H, *J* = 13.6 Hz), 2.33-2.44 (m, 1H), 2.58 (dd, *J*<sub>1</sub> = 4.4 Hz, *J*<sub>2</sub> = 15.6 Hz), 2.63 (dd, *J*<sub>1</sub> = 8.0 Hz, *J*<sub>2</sub> = 15.6 Hz), 3.25-3.30 (m, 1H), 3.34-3.41 (m, 1H), 3.64-3.69 (m, 1H), 3.70 (s, 3H), 3.78-3.83 (m, 1H), 3.91 (d, 1H, *J* = 14.0 Hz), 4.94 (d, 1H, *J* = 11.6 Hz), 4.95 (d, 1H, *J* = 16.0 Hz), 5.64 (dt, 1H, *J*<sub>1</sub> = 8.4 Hz, *J*<sub>2</sub> = 17.6 Hz), 5.71 (s, 1H); <sup>13</sup>C NMR (100 MHz, CDCl<sub>3</sub>) δ 21.1, 23.5, 31.5, 31.9, 34.2, 35.1, 41.0, 41.6, 42.3, 43.3, 51.0, 73.7, 73.8, 75.1, 75.5, 113.1, 114.9, 144.2, 156.2, 166.7, 175.9; IR (neat) cm<sup>-1</sup> 3074w, 2930s, 2859m, 1717s, 1652m, 1437m, 1372m, 1259m, 1204m, 1158s, 1089s, 1020m, 912m, 801m; HRMS (MALDI, *m/z*) calcd for C<sub>21</sub>H<sub>32</sub>O<sub>6</sub>Na (M+Na)<sup>+</sup>: 403.2091, found 403.2087.

### Synthesis of 22

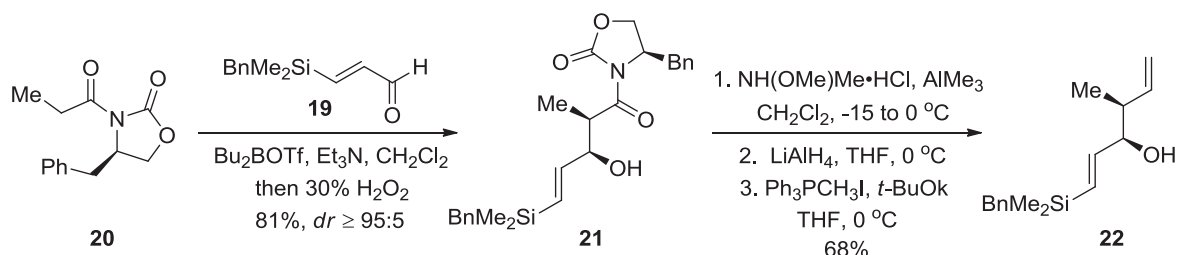

To a solution of **20** (2.28 g, 9.78 mmol) in CH<sub>2</sub>Cl<sub>2</sub> (20 mL) was added slowly Bu<sub>2</sub>BOTf (1.0 M in CH<sub>2</sub>Cl<sub>2</sub>, 9.78 mL, 9.78 mmol) at -78 °C under Ar. NEt<sub>3</sub> (1.56 mL, 11.25 mmol) was added to the orange solution where the color dissipated following the addition. The resulting yellow solution was allowed to stir for an additional 50 min at -78 °C, then at 0 °C for 15 min. The mixture was then

recooled to  $-78\text{ }^{\circ}\text{C}$  and aldehyde **19**<sup>5</sup> (1.0 g, 4.89 mmol) in  $\text{CH}_2\text{Cl}_2$  (5 mL) was added slowly via syringe. The resulting yellow solution was slowly warmed to  $-20\text{ }^{\circ}\text{C}$  over 2 h and stirred at  $-15\text{ }^{\circ}\text{C}$  for another 1 h. The solution was then warmed to  $-5\text{ }^{\circ}\text{C}$  and quenched with phosphate buffer (25 mL, pH 7) in one portion. To this vigorously stirred mixture was added 30%  $\text{H}_2\text{O}_2$  while maintaining the temperature below  $5\text{ }^{\circ}\text{C}$ . The addition of  $\text{H}_2\text{O}_2$  was continued until the internal temperature was no longer affected by excess oxidant. The resulting mixture was stirred for 45 min while slowly warming to room temperature. The mixture was then quenched with sat aq  $\text{NaHCO}_3$  (30 mL) and extracted with  $\text{CH}_2\text{Cl}_2$  ( $3 \times 30\text{ mL}$ ). The combined organic layers were dried over anhydrous  $\text{Na}_2\text{SO}_4$ , filtered and concentrated under reduced pressure. The residue was purified by silica gel chromatography **21** (1.73 g, 81% yield,  $dr \geq 95:5$ ) as a colorless, viscous oil.  $[\alpha]_{20}^{\text{D}} = -44.9$  (c 0.67 in  $\text{CHCl}_3$ );  $^1\text{H}$  NMR (400 MHz,  $\text{CDCl}_3$ )  $\delta$  0.07 (s, 6H), 1.19 (d, 3H,  $J = 6.8\text{ Hz}$ ), 2.15 (s, 2H), 2.80 (dd, 1H,  $J_1 = 9.6\text{ Hz}$ ,  $J_2 = 13.2\text{ Hz}$ ), 3.02 (d, 1H,  $J = 2.8\text{ Hz}$ ), 3.26 (dd, 1H,  $J_1 = 2.8\text{ Hz}$ ,  $J_2 = 13.6\text{ Hz}$ ), 3.81-3.86 (m, 1H), 4.18-4.24 (m, 2H), 4.51 (d, 1H,  $J = 2.8\text{ Hz}$ ), 4.67-4.72 (m, 1H), 5.95 (dd, 1H,  $J_1 = 2.8\text{ Hz}$ ,  $J_2 = 18.8\text{ Hz}$ ), 6.01 (d, 1H,  $J = 18.8\text{ Hz}$ ), 7.00 (d, 2H,  $J = 7.2\text{ Hz}$ ), 7.06 (t, 1H,  $J = 7.2\text{ Hz}$ ), 7.19-7.22 (m, 4H), 7.27-7.37 (m, 3H);  $^{13}\text{C}$  NMR (100 MHz,  $\text{CDCl}_3$ )  $\delta$  -3.5, -3.4, 10.4, 25.9, 37.7, 42.2, 55.1, 66.2, 73.3, 124.0, 127.4, 128.1, 128.2, 128.9, 129.0, 129.4, 134.9, 139.7, 145.7, 153.0, 176.8; IR (neat)  $\text{cm}^{-1}$  3510brm, 3026m, 2956s, 2924s, 1780s, 1697s, 1601m, 1493m, 1453m, 1386s, 1289m, 1243s, 1210s, 1111m, 997m, 835s; HRMS (MALDI,  $m/z$ ) calcd for  $\text{C}_{25}\text{H}_{31}\text{NO}_4\text{SiNa}$  ( $\text{M}+\text{Na}$ )<sup>+</sup>: 460.1915, found 460.1918.

To a solution of  $\text{NH}(\text{OMe})\text{Me}\cdot\text{HCl}$  (45 mg, 0.46 mmol) in  $\text{CH}_2\text{Cl}_2$  (1 mL) was added  $\text{AlMe}_3$  (2.5 M in hexanes, 184  $\mu\text{L}$ , 0.46 mmol) slowly at  $0\text{ }^{\circ}\text{C}$ . The reaction mixture was stirred at room temperature for 1 h and then cooled to  $-15\text{ }^{\circ}\text{C}$ . After a solution of **21** (100 mg, 0.23 mmol) in  $\text{CH}_2\text{Cl}_2$  (0.5 mL) was added dropwise, the mixture was warmed to  $0\text{ }^{\circ}\text{C}$  over 1 h. The reaction was quenched with sat aq potassium sodium tartrate (2 mL) and extracted with  $\text{Et}_2\text{O}$  ( $3 \times 2\text{ mL}$ ). The combined organic layers were washed with sat aq  $\text{NaCl}$ , dried over anhydrous  $\text{Na}_2\text{SO}_4$ , filtered and concentrated under reduced pressure. The residue was purified by silica gel chromatography (gradient eluent: 0-20% of  $\text{EtOAc}$ /petroleum ether) to afford the amide (65 mg, 88% yield) as a colorless oil.

To a solution of the above amide (65 mg, 0.2 mmol) in anhydrous THF (1 mL) was added

---

5. S. E. Denmark, S. Fujimori, *J. Am. Chem. Soc.* **2005**, 127, 8971–8973.

LiAlH<sub>4</sub> (15 mg, 0.40 mmol) at 0 °C. The reaction was stirred at 0 °C for 20 min before quenching with sat aq potassium sodium tartrate (1 mL) and extraction with Et<sub>2</sub>O (3 × 2 mL). The combined organic layers were washed with sat aq NaCl, dried over anhydrous Na<sub>2</sub>SO<sub>4</sub>, filtered and concentrated under reduced pressure. The residue was purified by silica gel chromatography (gradient eluent: 0-5% of EtOAc/petroleum ether) to afford the aldehyde (50 mg, 95% yield) as a colorless oil.

To a suspension of Ph<sub>3</sub>PCH<sub>3</sub>I (230 mg, 0.57 mmol) in anhydrous THF (2 mL) was added *t*-BuOK (64 mg, 0.57 mmol) under Ar at 0 °C. After stirring for 1 h, the above aldehyde (50 mg, 0.19 mmol) in anhydrous THF (0.5 mL) was added at -78 °C. The resulting mixture was warmed to room temperature and stirred for another 2 h. The reaction was quenched with sat aq NH<sub>4</sub>Cl (1.5 mL) and extracted with Et<sub>2</sub>O (3 × 3 mL). The combined organic layers were dried over anhydrous Na<sub>2</sub>SO<sub>4</sub>, filtered and concentrated under reduced pressure. The residue was purified by silica gel chromatography (gradient eluent: 0-4% of EtOAc/petroleum ether) to afford **22** (40 mg, 81% yield) as a colorless oil.  $[\alpha]_{20}^D = -2.1$  (c 0.90 in CHCl<sub>3</sub>); <sup>1</sup>H NMR (400 MHz, CDCl<sub>3</sub>) δ 0.09 (s, 6H), 1.02 (d, 3H, *J* = 7.2 Hz), 1.83 (d, 1H, *J* = 4.0 Hz), 2.17 (s, 2H), 2.35-2.40 (m, 1H), 4.03-4.04 (m, 1H), 5.11 (d, 1H, *J* = 16.8 Hz), 5.12 (d, 1H, *J* = 10.4 Hz), 5.77 (ddd, 1H, *J*<sub>1</sub> = 8.0 Hz, *J*<sub>2</sub> = 9.6 Hz, *J*<sub>3</sub> = 18.4 Hz), 5.86 (d, 1H, *J* = 18.8 Hz), 6.04 (dd, 1H, *J*<sub>1</sub> = 4.8 Hz, *J*<sub>2</sub> = 18.8 Hz), 7.02 (d, 2H, *J* = 7.2 Hz), 7.09 (t, 1H, *J* = 7.2 Hz), 7.22 (t, 2H, *J* = 7.6 Hz); <sup>13</sup>C NMR (100 MHz, CDCl<sub>3</sub>) δ -3.4, -3.3, 14.4, 26.0, 43.4, 77.0, 115.8, 124.0, 128.1, 128.2, 128.4, 139.8, 140.0, 147.2; IR (neat) cm<sup>-1</sup> 3392brm, 3079m, 3024m, 2960s, 2926s, 2893m, 1601w, 1493m, 1455m, 1415m, 1250s, 1207m, 1154m, 994s, 912m, 835s; HRMS (MALDI, *m/z*) calcd for C<sub>16</sub>H<sub>24</sub>OSiK (M+K)<sup>+</sup>: 299.1228, found 299.1224.

### Synthesis of 17

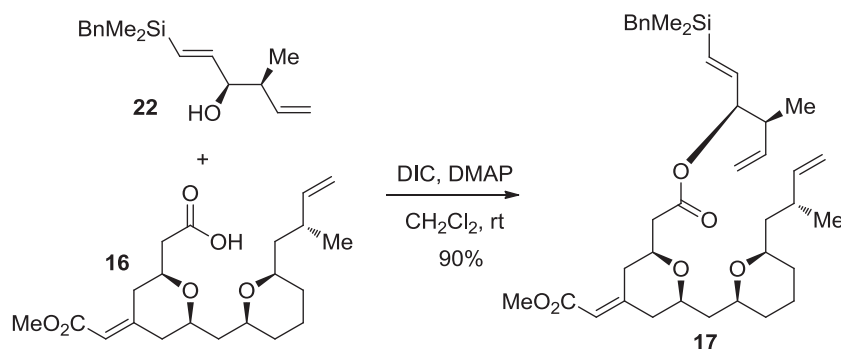

To a solution of **16** (95 mg, 0.25 mmol) and alcohol **22** (85 mg, 0.325 mmol) in  $\text{CH}_2\text{Cl}_2$  (2 mL) was added DIC (47 mg, 0.375 mmol) and DMAP (3 mg, 0.025 mmol) at 0 °C. After stirring for 4 h at room temperature, the reaction was quenched with sat aq  $\text{NH}_4\text{Cl}$  (1.5 mL) and extracted with EtOAc ( $3 \times 3$  mL). The combined organic layers were dried over anhydrous  $\text{Na}_2\text{SO}_4$ , filtered and concentrated under reduced pressure. The residue was purified by silica gel chromatography (gradient eluent: 0-7% of EtOAc/petroleum ether) to afford **17** (140 mg, 90% yield) as a colorless oil.  $[\alpha]_{\text{D}}^{20} = -21.2$  (c 0.60 in  $\text{CHCl}_3$ );  $^1\text{H}$  NMR (400 MHz,  $\text{CDCl}_3$ )  $\delta$  0.04 (s, 6H), 0.97 (d, 3H,  $J = 6.8$  Hz), 0.99 (d, 3H,  $J = 6.4$  Hz), 1.14-1.22 (m, 3H), 1.44-1.54 (m, 5H), 1.78-1.80 (m, 1H), 1.89 (t, 1H,  $J = 14.0$  Hz), 1.91 (t, 1H,  $J = 12.8$  Hz), 2.11 (t, 1H,  $J = 12.8$  Hz), 2.13 (s, 2H), 2.28 (d, 1H,  $J = 12.8$ ), 2.33-2.40 (m, 1H), 2.45 (dd, 1H,  $J_1 = 6.8$  Hz,  $J_2 = 13.2$  Hz), 2.53 (dd, 1H,  $J_1 = 4.4$  Hz,  $J_2 = 15.2$  Hz), 2.62 (dd, 1H,  $J_1 = 8.4$  Hz,  $J_2 = 14.8$  Hz), 3.25 (tm, 1H,  $J = 10.0$  Hz), 3.34-3.39 (m, 1H), 3.61-3.65 (m, 1H), 3.69 (s, 3H), 3.80-3.86 (m, 1H), 3.90 (d, 1H,  $J = 14.0$  Hz), 4.94 (d, 1H,  $J = 10.8$  Hz), 4.95 (d, 1H,  $J = 16.4$  Hz), 5.02 (d, 1H,  $J = 18.0$  Hz), 5.03 (d, 1H,  $J = 10.0$  Hz), 5.18 (t, 1H,  $J = 5.6$  Hz), 5.63 (ddd, 1H,  $J_1 = 8.4$  Hz,  $J_2 = 10.8$  Hz,  $J_3 = 16.8$  Hz), 5.66-5.75 (m, 2H), 5.78 (d, 1H,  $J = 18.8$  Hz), 5.88 (dd, 1H,  $J_1 = 5.2$  Hz,  $J_2 = 18.8$  Hz), 6.98 (d, 2H,  $J = 7.6$  Hz), 7.06 (t, 1H,  $J = 7.2$  Hz), 7.19 (t, 2H,  $J = 7.6$  Hz);  $^{13}\text{C}$  NMR (100 MHz,  $\text{CDCl}_3$ )  $\delta$  -3.5, 15.2, 21.2, 23.6, 25.9, 31.6, 32.0, 34.3, 35.3, 41.3, 41.6, 41.7, 42.5, 43.4, 51.0, 73.6, 74.2, 74.9, 75.4, 78.9, 113.1, 114.7, 115.4, 124.0, 128.1, 128.2, 130.4, 139.3, 139.7, 142.7, 144.3, 156.8, 166.8, 170.0; IR (neat)  $\text{cm}^{-1}$  2959s, 2920s, 2851s, 1718s, 1654m, 1519w, 1462m, 1374m, 1260s, 1155s, 1088s, 1021s, 912m, 802s; HRMS (MALDI,  $m/z$ ) calcd for  $\text{C}_{37}\text{H}_{54}\text{O}_6\text{SiNa}$  ( $\text{M}+\text{Na}$ ) $^+$ : 645.3582, found 645.3578.

### Synthesis of 18

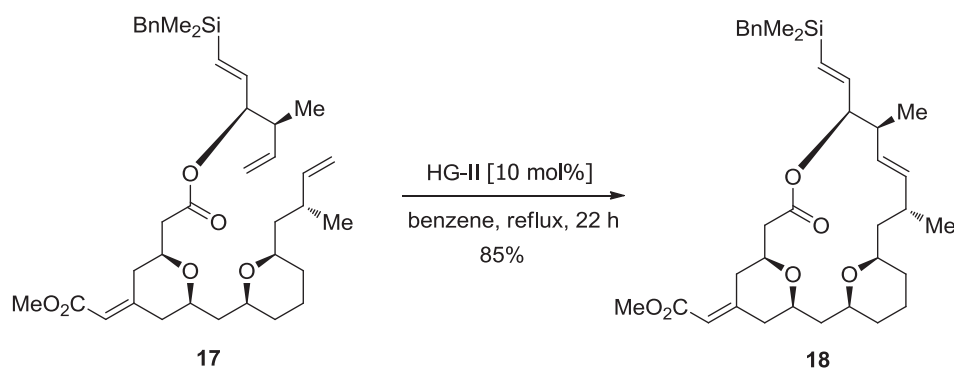

A solution of ester **17** (76 mg, 0.122 mmol) and Hoveyda-Grubbs 2<sup>nd</sup> generation catalyst (HG-II) (8 mg, 0.012 mmol) in benzene (25 ml) was reflux for 22 h. After the reaction was cooled to room temperature, the solvent was removed under reduced pressure. The residue was purified by silica gel chromatography (gradient eluent: 0-5% of EtOAc/petroleum ether) to afford macrocycle **18** (62 mg, 85% yield) as a colorless oil.  $[\alpha]_{20}^D = -30.7$  (c 0.38 in  $\text{CHCl}_3$ );  $^1\text{H}$  NMR (400 MHz,  $\text{CDCl}_3$ )  $\delta$  0.04 (s, 3H), 0.05 (s, 3H), 0.94 (d, 3H,  $J = 6.8$  Hz), 0.95 (d, 3H,  $J = 6.8$  Hz), 1.02-1.21 (m, 3H), 1.35-1.56 (m, 5H), 1.74-1.80 (m, 2H), 1.99 (t, 1H,  $J = 12.4$  Hz), 2.10-2.15 (m, 3H), 2.34 (t, 1H,  $J = 12.4$  Hz), 2.31-2.35 (m, 1H), 2.49-2.56 (m, 1H), 2.57-2.63 (m, 2H), 3.16-3.23 (m, 2H), 3.29 (t, 1H,  $J = 10.0$  Hz), 3.70 (s, 3H), 3.79-3.85 (m, 1H), 3.89 (d, 1H,  $J = 13.6$  Hz), 5.07 (dd, 1H,  $J_1 = 9.6$  Hz,  $J_2 = 14.8$  Hz), 5.17-5.18 (m, 1H), 5.50 (dd, 1H,  $J_1 = 9.6$  Hz,  $J_2 = 15.2$  Hz), 5.68 (d, 1H,  $J = 18.8$  Hz), 5.70 (s, 1H), 5.87 (dd, 1H,  $J_1 = 4.4$  Hz,  $J_2 = 18.8$  Hz), 6.98 (d, 2H,  $J = 7.2$  Hz), 7.07 (t, 1H,  $J = 7.2$  Hz), 7.20 (t, 2H,  $J = 7.2$  Hz);  $^{13}\text{C}$  NMR (100 MHz,  $\text{CDCl}_3$ )  $\delta$  -3.5, -3.4, 14.2, 21.8, 23.9, 26.0, 31.6, 32.4, 33.0, 34.8, 41.3, 41.4, 42.5, 43.1, 44.0, 51.0, 74.2, 74.8, 75.3, 76.0, 79.9, 115.0, 124.0, 128.1, 128.2, 128.3, 132.7, 135.3, 139.7, 144.0, 156.8, 166.8, 170.5; IR (neat)  $\text{cm}^{-1}$  2961s, 2919s, 2851s, 1738s, 1722s, 1653m, 1458m, 1437m, 1374m, 1260s, 1154s, 1089s, 1019s, 800s; HRMS (MALDI,  $m/z$ ) calcd for  $\text{C}_{35}\text{H}_{50}\text{O}_6\text{SiNa}$  ( $M+\text{Na}$ )<sup>+</sup>: 617.3269, found 617.3270.

### Synthesis of 25

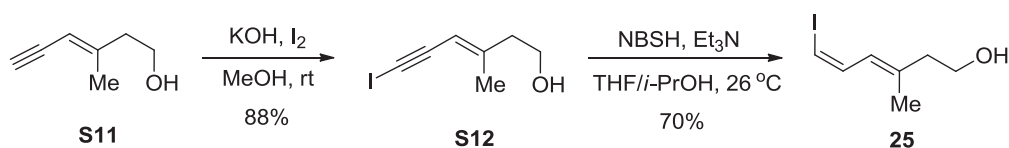

To a solution of **S11**<sup>6</sup> (220 mg, 2.0 mmol) in MeOH (5 mL) was added sequentially a solution of

6. M. S. Kwon, S. K. Woo, S. W. Na, E. Lee, *Angew. Chem.* **2008**, 120, 1757–1759; *Angew. Chem. Int. Ed.* **2008**, 47, 1733–1735.

KOH (281 mg, 5.0 mmol) in H<sub>2</sub>O (1 mL) and I<sub>2</sub> (661 mg, 2.6 mmol) at 0 °C. After stirring at room temperature for 3 h, the reaction was diluted with H<sub>2</sub>O (3 mL) and extracted with Et<sub>2</sub>O (3 × 5 mL). The combined organic layers were dried over anhydrous Na<sub>2</sub>SO<sub>4</sub>, filtered and concentrated under reduced pressure. The residue was purified by silica gel chromatography (gradient eluent: 0-10% of diethyl ether/petroleum ether) to afford **S12** (415 mg, 88% yield) as a yellow oil. <sup>1</sup>H NMR (400 MHz, CDCl<sub>3</sub>) δ 1.96 (s, 3H), 2.35 (t, 2H, *J* = 6.4 Hz), 3.72 (t, 2H, *J* = 6.4 Hz), 5.48 (s, 1H); <sup>13</sup>C NMR (100 MHz, CDCl<sub>3</sub>) δ 7.1, 19.3, 41.3, 60.2, 91.9, 107.6, 151.2; IR (neat) cm<sup>-1</sup> 3444brs, 2974s, 2933s, 1718s, 1381m, 1218s, 1172s, 1077s, 759s; HRMS (MALDI, *m/z*) calcd for C<sub>7</sub>H<sub>10</sub>IO (M+H)<sup>+</sup>: 236.9771, found 236.9773.

To a solution of **S12** (100 mg, 0.424 mmol) in THF/*i*-PrOH (1:1, 3 mL) were added Et<sub>3</sub>N (95 μL, 0.68 mmol) and *o*-nitrobenzenesulfonyl hydrazide (NBSH) (166 mg, 0.763 mmol) at room temperature. After stirring in dark at room temperature for 15 h, the reaction was diluted with H<sub>2</sub>O (2 mL) and sat aq NaCl (2 mL), and extracted with Et<sub>2</sub>O (2 × 5 mL). The combined organic layers were dried over anhydrous Na<sub>2</sub>SO<sub>4</sub>, filtered and concentrated under reduced pressure. The residue was purified by silica gel chromatography (gradient eluent: 0-10% of diethyl ether/petroleum ether) to afford **25** (71 mg, 70 % yield) as a colorless oil. <sup>1</sup>H NMR (400 MHz, CDCl<sub>3</sub>) δ 1.85 (s, 3H), 2.40 (t, 2H, *J* = 6.4 Hz), 3.77 (t, 2H, *J* = 6.4 Hz), 6.05 (d, 1H, *J* = 10.0 Hz), 6.23 (d, 1H, *J* = 7.6 Hz), 6.92 (dd, 1H, *J*<sub>1</sub> = 7.6 Hz, *J*<sub>2</sub> = 10.0 Hz); <sup>13</sup>C NMR (150 MHz, CDCl<sub>3</sub>) δ 17.9, 42.9, 60.4, 81.9, 127.4, 134.1, 140.8; IR (neat) cm<sup>-1</sup> 3447brs, 2953s, 2924s, 2855s, 1644m, 1461m, 1368m, 1285m, 1262m, 1030m, 800m; HRMS (MALDI, *m/z*) calcd for C<sub>7</sub>H<sub>11</sub>IONa (M+Na)<sup>+</sup>: 260.9747, found 260.9743.

### Synthesis of 23

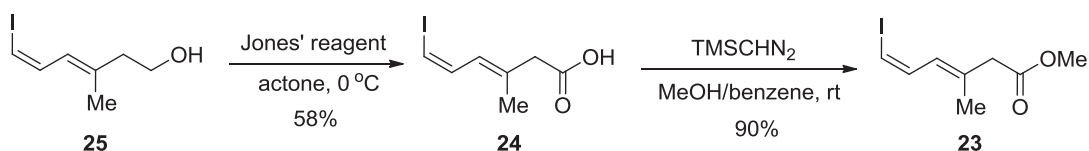

To a solution of **25** (70 mg, 0.294 mmol) in acetone (3 mL) was added freshly prepared Jones' reagent (2.23 M, 435 μL, 0.97 mmol) at 0 °C. The reaction was stirred for 20 min at 0 °C before quenching with *i*-PrOH (0.2 ml). The resulting mixture was diluted with H<sub>2</sub>O (1.5 mL) and

extracted with Et<sub>2</sub>O (3 × 3 mL). The combined organic layers were dried over anhydrous Na<sub>2</sub>SO<sub>4</sub>, filtered and concentrated under reduced pressure. The residue was purified by silica gel chromatography (gradient eluent: 0-8% of diethyl ether/petroleum ether) to afford acid **24** (43 mg, 58% yield) as a yellow oil. <sup>1</sup>H NMR (400 MHz, CDCl<sub>3</sub>) δ 1.90 (s, 3H), 3.18 (s, 2H), 6.10 (d, 1H, *J* = 10.0 Hz), 6.31 (d, 1H, *J* = 7.6 Hz), 6.91 (dd, 1H, *J*<sub>1</sub> = 8.0 Hz, *J*<sub>2</sub> = 10.0 Hz); <sup>13</sup>C NMR (150 MHz, CDCl<sub>3</sub>) δ 18.2, 44.7, 83.5, 129.5, 133.9, 135.7, 176.9; IR (neat) cm<sup>-1</sup> 3069m, 2922s, 2852m, 1707s, 1645m, 1412m, 1287s, 1238m, 1214m, 1167m, 1018w, 931m; HRMS (MALDI, *m/z*) calcd for C<sub>7</sub>H<sub>9</sub>IO<sub>2</sub>K (M+K)<sup>+</sup>: 290.9279, found 290.9280.

To a solution of **24** (42 mg, 0.167 mmol) in MeOH (330 μL) and benzene (1.19 mL) was added TMSCHN<sub>2</sub> (2.0 M in hexanes, 167 μL, 0.334 mmol) at 0 °C. After stirring for 10 min at room temperature, AcOH was added dropwise until yellow color dissipated to a colorless solution. This reaction was diluted with H<sub>2</sub>O (2.5 mL) and extracted with Et<sub>2</sub>O (3 × 4 mL). The combined organic layers were dried over anhydrous Na<sub>2</sub>SO<sub>4</sub>, filtered and concentrated under reduced pressure. The residue was purified by silica gel chromatography (gradient eluent: 0-1% of diethyl ether/petroleum ether) to afford ester **23** (40 mg, 90% yield) as a yellow oil. <sup>1</sup>H NMR (600 MHz, CDCl<sub>3</sub>) δ 1.88 (s, 3H), 3.15 (s, 2H), 3.71 (s, 3H), 6.08 (d, 1H, *J* = 10.2 Hz), 6.29 (d, 1H, *J* = 7.8 Hz), 6.91 (dd, 1H, *J*<sub>1</sub> = 7.8 Hz, *J*<sub>2</sub> = 9.6 Hz); <sup>13</sup>C NMR (150 MHz, CDCl<sub>3</sub>) δ 18.2, 45.0, 52.0, 83.1, 129.0, 134.0, 136.5, 171.2; IR (neat) cm<sup>-1</sup> 3067m, 2920s, 2849m, 1727s, 1643m, 1412m, 1287s, 1248m, 1166m, 1025m; HRMS (MALDI, *m/z*) calcd for C<sub>8</sub>H<sub>11</sub>IO<sub>2</sub>Na (M+Na)<sup>+</sup>: 288.9696, found 288.9698.

### Synthesis of 27

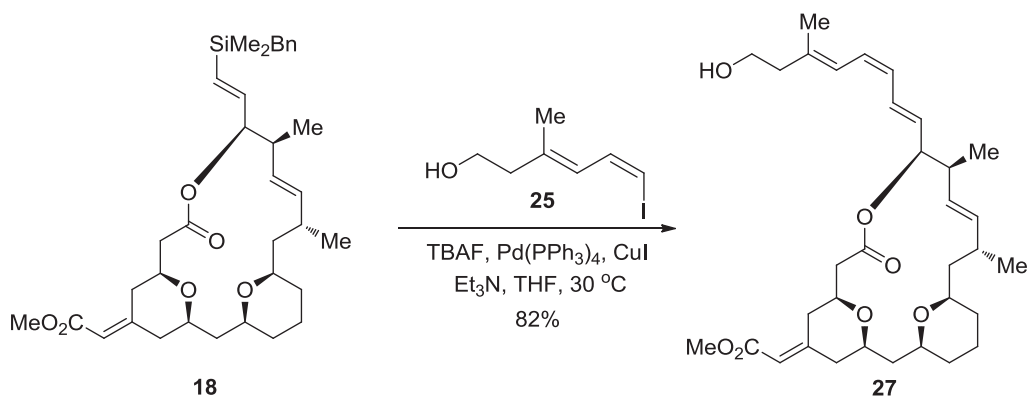

To a solution of **18** (25 mg, 0.042 mmol) in anhydrous THF (1 mL) was added TBAF (1.0 M in

THF, 126  $\mu$ L, 0.126 mmol) at 0  $^{\circ}$ C under Ar. The reaction was stirred at 0  $^{\circ}$ C for 20 min before the sequential addition of Pd(PPh<sub>3</sub>)<sub>4</sub> (5 mg, 0.0042 mmol), CuI (8 mg, 0.042 mmol), Et<sub>3</sub>N (17  $\mu$ L, 0.126 mmol) and **26** (15 mg, 0.063 mmol) in anhydrous THF (0.5 mL). The reaction was allowed to warm to 30  $^{\circ}$ C and stirred for 3 h. The solvent was removed under reduced pressure and the residue was purified by silica gel chromatography (gradient eluent: 0-30% of EtOAc/petroleum ether) to afford **27** (19 mg, 82% yield) as a colorless, viscous oil.  $[\alpha]_D^{20} = -69.1$  (c 0.25 in CHCl<sub>3</sub>); <sup>1</sup>H NMR (400 MHz, CDCl<sub>3</sub>)  $\delta$  0.94 (d, 3H,  $J = 6.4$  Hz), 1.06 (d, 3H,  $J = 6.8$  Hz), 1.07-1.28 (m, 3H), 1.37-1.62 (m, 4H), 1.67 (d, 1H,  $J = 4.4$  Hz), 1.73-1.80 (m, 2H), 1.81 (s, 3H), 1.94-2.04 (m, 2H), 2.12 (dm, 1H,  $J = 13.2$  Hz), 2.20-2.28 (m, 1H), 2.33-2.41 (m, 3H), 2.48-2.61 (m, 3H), 3.17-3.25 (m, 2H), 3.30 (dd, 1H,  $J_1 = 9.2$  Hz,  $J_2 = 10.0$  Hz), 3.70 (s, 3H), 3.73-3.82 (m, 3H), 3.87 (dm, 1H,  $J = 14.0$  Hz), 5.08 (dd, 1H,  $J_1 = 9.6$  Hz,  $J_2 = 15.2$  Hz), 5.26 (dm, 1H,  $J = 6.8$  Hz), 5.53 (dd, 1H,  $J_1 = 9.6$  Hz,  $J_2 = 15.2$  Hz), 5.66 (dd, 1H,  $J_1 = 6.8$  Hz,  $J_2 = 15.2$  Hz), 5.70 (s, 1H), 5.93 (dd, 1H,  $J_1 = 10.8$  Hz,  $J_2 = 11.2$  Hz), 6.19 (t, 1H,  $J = 11.2$  Hz), 6.37 (dm, 1H,  $J = 11.6$  Hz), 6.69 (dd, 1H,  $J_1 = 11.2$  Hz,  $J_2 = 14.8$  Hz); <sup>13</sup>C NMR (100 MHz, CDCl<sub>3</sub>)  $\delta$  14.4, 16.3, 21.8, 23.9, 31.6, 32.5, 33.0, 34.8, 41.6, 42.2, 42.5, 43.1, 43.4, 44.1, 51.1, 60.4, 74.2, 74.9, 75.3, 76.0, 78.7, 115.0, 122.8, 125.7, 127.1, 127.6, 131.0, 132.5, 135.4, 136.5, 156.8, 166.8, 170.7; IR (neat) cm<sup>-1</sup> 3434brm, 2956s, 2858s, 1723s, 1654m, 1441m, 1373m, 1242s, 1156s, 1094s, 979m, 863m, 801m; HRMS (MALDI,  $m/z$ ) calcd for C<sub>33</sub>H<sub>48</sub>O<sub>7</sub>Na (M+Na)<sup>+</sup>: 579.3292, found 579.3296.

### Synthesis of (-)-Exiguolide (1)

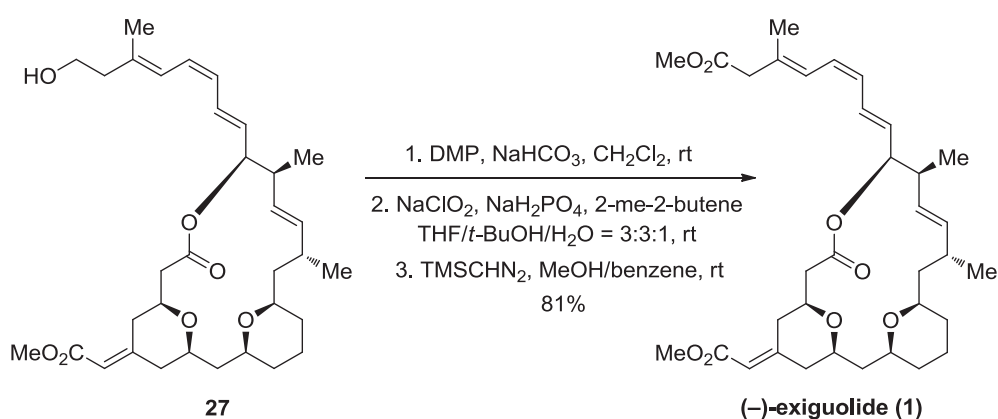

To a mixture of alcohol **27** (10 mg, 0.018 mmol) and NaHCO<sub>3</sub> (15 mg, 0.18 mmol) in CH<sub>2</sub>Cl<sub>2</sub> (1.0 mL) was added Dess-Martin periodinane (DMP) (16 mg, 0.036 mmol) at 0  $^{\circ}$ C under Ar. The

reaction was warmed to room temperature over 1 h before quenching with sat aq  $\text{Na}_2\text{S}_2\text{O}_3$  (0.3 mL) and extraction with  $\text{CH}_2\text{Cl}_2$  ( $3 \times 2$  mL). The combined organic layers were washed with sat aq  $\text{NaCl}$ , dried over anhydrous  $\text{Na}_2\text{SO}_4$ , filtered and concentrated under reduced pressure to give the crude aldehyde. This intermediate was used for the next step without any further purification.

To a solution of the above aldehyde, 2-methylbut-2-ene (100  $\mu\text{L}$ ) and  $\text{NaH}_2\text{PO}_4$  (7.6 mg, 0.063 mmol) in  $\text{THF}/t\text{-BuOH}/\text{H}_2\text{O}$  (3:3:1, 0.7 mL) was added  $\text{NaClO}_2$  (5.7 mg, 0.063 mmol) at 0  $^\circ\text{C}$ . The reaction mixture was warmed to room temperature over 1 h before quenching with sat aq  $\text{Na}_2\text{S}_2\text{O}_3$  (0.5 mL) and extraction with  $\text{EtOAc}$  ( $3 \times 1$  mL). The combined organic layers were dried over anhydrous  $\text{Na}_2\text{SO}_4$ , filtered and concentrated under reduced pressure to give the crude acid. This intermediate was used for the next step without any further purification.

To a solution of the above acid in  $\text{MeOH}$  (100  $\mu\text{L}$ ) and benzene (0.4 mL) was added  $\text{TMSCHN}_2$  (2.0 M in hexanes, 18  $\mu\text{L}$ , 0.036 mmol) at 0  $^\circ\text{C}$ . After stirring for 10 min at room temperature, the reaction was quenched with  $\text{AcOH}$  (5  $\mu\text{L}$ )/ $\text{H}_2\text{O}$  (0.5 mL) and extracted with  $\text{EtOAc}$  ( $3 \times 1$  mL). The combined organic layers were dried over anhydrous  $\text{Na}_2\text{SO}_4$ , filtered and concentrated under reduced pressure. The residue was purified by silica gel chromatography (gradient eluent: 0-12% of  $\text{EtOAc}$ /petroleum ether) to afford (–)-exiguolide (**1**) (8.4 mg, 81% yield) as a viscous oil.  $[\alpha]_{20}^{\text{D}} = -84.6$  (c 0.09 in  $\text{CHCl}_3$ );  $^1\text{H}$  NMR (400 MHz,  $\text{CDCl}_3$ )  $\delta$  0.94 (d, 3H,  $J = 6.4$  Hz), 1.05 (d, 3H,  $J = 7.2$  Hz), 1.07-1.28 (m, 3H), 1.37-1.62 (m, 5H), 1.75-1.81 (m, 2H), 1.85 (s, 3H), 1.97 (dd, 1H,  $J_1 = 12.8$  Hz,  $J_2 = 13.6$  Hz), 2.12 (dm, 1H,  $J = 13.2$  Hz), 2.23 (dd, 1H,  $J_1 = 11.2$  Hz,  $J_2 = 12.8$  Hz), 2.34 (dq, 1H,  $J_1 = 7.2$  Hz,  $J_2 = 10.0$  Hz), 2.48-2.58 (m, 3H), 3.13 (s, 2H), 3.18-3.21 (m, 2H), 3.30 (dd, 1H,  $J_1 = 9.2$  Hz,  $J_2 = 9.6$  Hz), 3.70 (s, 3H), 3.70 (s, 3H), 3.79 (m, 1H), 3.87 (dm, 1H,  $J = 14.0$  Hz), 5.07 (dd, 1H,  $J_1 = 10.0$  Hz,  $J_2 = 15.2$  Hz), 5.26 (dm, 1H,  $J = 7.2$  Hz), 5.52 (dd, 1H,  $J_1 = 9.6$  Hz,  $J_2 = 14.8$  Hz), 5.66 (dd, 1H,  $J_1 = 6.8$  Hz,  $J_2 = 15.2$  Hz), 5.70 (s, 1H), 5.97 (dd, 1H,  $J_1 = 10.8$  Hz,  $J_2 = 11.2$  Hz), 6.19 (dd, 1H,  $J_1 = J_2 = 11.2$  Hz), 6.38 (dm, 1H,  $J = 11.2$  Hz), 6.67 (dd, 1H,  $J_1 = 11.2$  Hz,  $J_2 = 14.8$  Hz);  $^{13}\text{C}$  NMR (100 MHz,  $\text{CDCl}_3$ )  $\delta$  14.4, 16.8, 21.8, 23.9, 31.6, 32.4, 33.0, 34.7, 41.6, 42.1, 42.4, 43.1, 44.1, 45.4, 51.1, 51.9, 74.1, 74.9, 75.3, 76.0, 78.6, 114.9, 124.1, 125.5, 127.6, 128.0, 131.3, 132.5, 135.4, 156.8, 166.8, 170.7, 171.8; IR (neat)  $\text{cm}^{-1}$  3341m, 2950s, 2920s, 2842s, 1731m, 1650m, 1430m, 1367m, 1235m, 1150m, 1088m, 970m, 852m; HRMS (MALDI,  $m/z$ ) calcd for  $\text{C}_{34}\text{H}_{48}\text{O}_8\text{Na}$  ( $\text{M}+\text{Na}$ ) $^+$ : 607.3241, found 607.3246.

### 3. Comparison of $^{13}\text{C}$ NMR Spectral Data of Isolated and Synthetic (-)-Exiguolide

| <b><math>^{13}\text{C}</math> NMR of Isolated<br/>(-)-Exiguolide</b> | <b><math>^{13}\text{C}</math> NMR of Synthetic<br/>(-)-Exiguolide</b> |
|----------------------------------------------------------------------|-----------------------------------------------------------------------|
| 171.8                                                                | 171.8                                                                 |
| 170.7                                                                | 170.7                                                                 |
| 166.8                                                                | 166.8                                                                 |
| 156.7                                                                | 156.8                                                                 |
| 135.5                                                                | 135.4                                                                 |
| 132.5                                                                | 132.5                                                                 |
| 131.4                                                                | 131.3                                                                 |
| 128.0                                                                | 128.0                                                                 |
| 127.6                                                                | 127.6                                                                 |
| 125.5                                                                | 125.5                                                                 |
| 124.1                                                                | 124.1                                                                 |
| 115.0                                                                | 114.9                                                                 |
| 78.6                                                                 | 78.6                                                                  |
| 76.0                                                                 | 76.0                                                                  |
| 75.4                                                                 | 75.3                                                                  |
| 74.9                                                                 | 74.9                                                                  |
| 74.2                                                                 | 74.1                                                                  |
| 51.9                                                                 | 51.9                                                                  |
| 51.0                                                                 | 51.1                                                                  |
| 45.4                                                                 | 45.4                                                                  |
| 44.1                                                                 | 44.1                                                                  |
| 43.1                                                                 | 43.1                                                                  |
| 42.5                                                                 | 42.4                                                                  |
| 42.1                                                                 | 42.1                                                                  |
| 41.6                                                                 | 41.6                                                                  |
| 34.8                                                                 | 34.7                                                                  |
| 33.1                                                                 | 33.0                                                                  |
| 32.5                                                                 | 32.4                                                                  |
| 31.6                                                                 | 31.6                                                                  |
| 23.9                                                                 | 23.9                                                                  |
| 21.8                                                                 | 21.8                                                                  |
| 16.8                                                                 | 16.8                                                                  |
| 14.4                                                                 | 14.4                                                                  |

| <b><i><sup>1</sup>H NMR of Isolated (–)-Exiguolide</i></b> | <b><i><sup>1</sup>H NMR of Synthetic (–)-Exiguolide</i></b> |
|------------------------------------------------------------|-------------------------------------------------------------|
| 6.67 (dd, $J = 15.3, 11.6$ Hz, 1H)                         | 6.67 (dd, $J_1 = 11.2$ Hz, $J_2 = 14.8$ Hz, 1H)             |
| 6.38 (br d, $J = 11.6$ Hz, 1H)                             | 6.38 (dm, $J = 11.2$ Hz, 1H)                                |
| 6.19 (dd, $J = 11.6, 11.0$ Hz, 1H)                         | 6.19 (dd, $J_1 = J_2 = 11.2$ Hz, 1H)                        |
| 5.97 (dd, $J = 11.6, 11.0$ Hz, 1H)                         | 5.97 (dd, $J_1 = 10.8$ Hz, $J_2 = 11.2$ Hz, 1H)             |
| 5.70 (s, 1H)                                               | 5.70 (s, 1H)                                                |
| 5.66 (dd, $J = 15.3, 7.3$ Hz, 1H)                          | 5.66 (dd, $J_1 = 6.8$ Hz, $J_2 = 15.2$ Hz, 1H)              |
| 5.52 (dd, $J = 15.3, 9.8$ Hz, 1H)                          | 5.52 (dd, $J_1 = 9.6$ Hz, $J_2 = 14.8$ Hz, 1H)              |
| 5.26 (br d, $J = 7.3$ Hz, 1H)                              | 5.26 (dm, $J = 7.2$ Hz, 1H)                                 |
| 5.08 (dd, $J = 15.3, 9.8$ Hz, 1H)                          | 5.07 (dd, $J_1 = 10.0$ Hz, $J_2 = 15.2$ Hz, 1H)             |
| 3.87 (br d, $J = 13.4$ Hz, 1H)                             | 3.87 (dm, $J = 14.0$ Hz, 1H)                                |
| 3.79 (dddd, $J = 12.8, 11.0, 4.3, 2.4$ Hz, 1H)             | 3.79 (m, 1H)                                                |
| 3.69 (s, 3H)                                               | 3.70 (s, 3H)                                                |
| 3.70 (s, 3H)                                               | 3.70 (s, 3H)                                                |
| 3.30 (br dd, $J = 11.0, 8.5$ Hz, 1H)                       | 3.30 (dd, $J_1 = 9.2$ Hz, $J_2 = 9.6$ Hz, 1H)               |
| 3.21 (br t, $J = 11.0$ , 1H)                               | 3.18-3.21 (m, 2H)                                           |
| 3.19 (br dd, $J = 11.3, 9.2$ Hz, 1H)                       |                                                             |
| 3.13 (s, 2H)                                               |                                                             |
| 2.57 (dd, $J = 14.0, 11.0$ Hz, 1H)                         | 2.48-2.58 (m, 3H)                                           |
| 2.55 (dd, $J = 14.0, 2.4$ Hz, 1H)                          |                                                             |
| 2.53 (m, 1H)                                               |                                                             |
| 2.34 (br dq, $J = 9.8, 7.3$ Hz, 1H)                        | 2.34 (dq, $J_1 = 7.2$ Hz, $J_2 = 10.0$ Hz, 1H)              |
| 2.23 (br dd, $J = 12.8, 11.3$ Hz, 1H)                      | 2.23 (dd, $J_1 = 11.2$ Hz, $J_2 = 12.8$ Hz, 1H)             |
| 2.12 (br d, $J = 12.8$ Hz, 1H)                             | 2.12 (dm, $J = 13.2$ Hz, 1H)                                |
| 1.97 (dd, $J = 13.4, 12.8$ Hz, 1H)                         | 1.97 (dd, $J_1 = 12.8$ Hz, $J_2 = 13.6$ Hz, 1H)             |
| 1.85 (s, 3H)                                               | 1.85 (s, 3H)                                                |
| 1.78 (br dd, $J = 13.4, 9.2$ Hz, 1H)                       | 1.75-1.81 (m, 2H)                                           |
| 1.77 (br d, $J = 12.8$ Hz, 1H)                             |                                                             |
| 1.62 (br d, $J = 12.8$ Hz, 1H)                             |                                                             |
| 1.56 (br dd, $J = 13.4, 8.5$ Hz, 1H)                       | 1.37-1.62 (m, 5H)                                           |
| 1.51 (m, 1H)                                               |                                                             |
| 1.47 (ddd, $J = 14.0, 11.0, 3.1$ Hz, 1H)                   |                                                             |
| 1.41 (br d, $J = 12.8$ Hz, 1H)                             |                                                             |
| 1.21 (br dddd, $J = 12.8, 11.0, 11.0, 3.7$ Hz, 1H)         |                                                             |
| 1.12 (br ddd, $J = 12.8, 11.0, 11.0$ Hz, 1H)               | 1.07-1.28 (m, 3H)                                           |
| 1.09 (br dd, $J = 14.0, 12.2$ Hz, 1H)                      |                                                             |
| 1.05 (d, $J = 7.3$ Hz, 3H)                                 |                                                             |
| 0.94 (d, $J = 6.7$ Hz, 3H)                                 | 0.94 (d, $J = 6.4$ Hz, 3H)                                  |

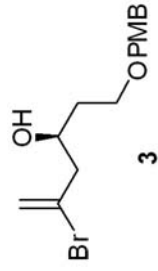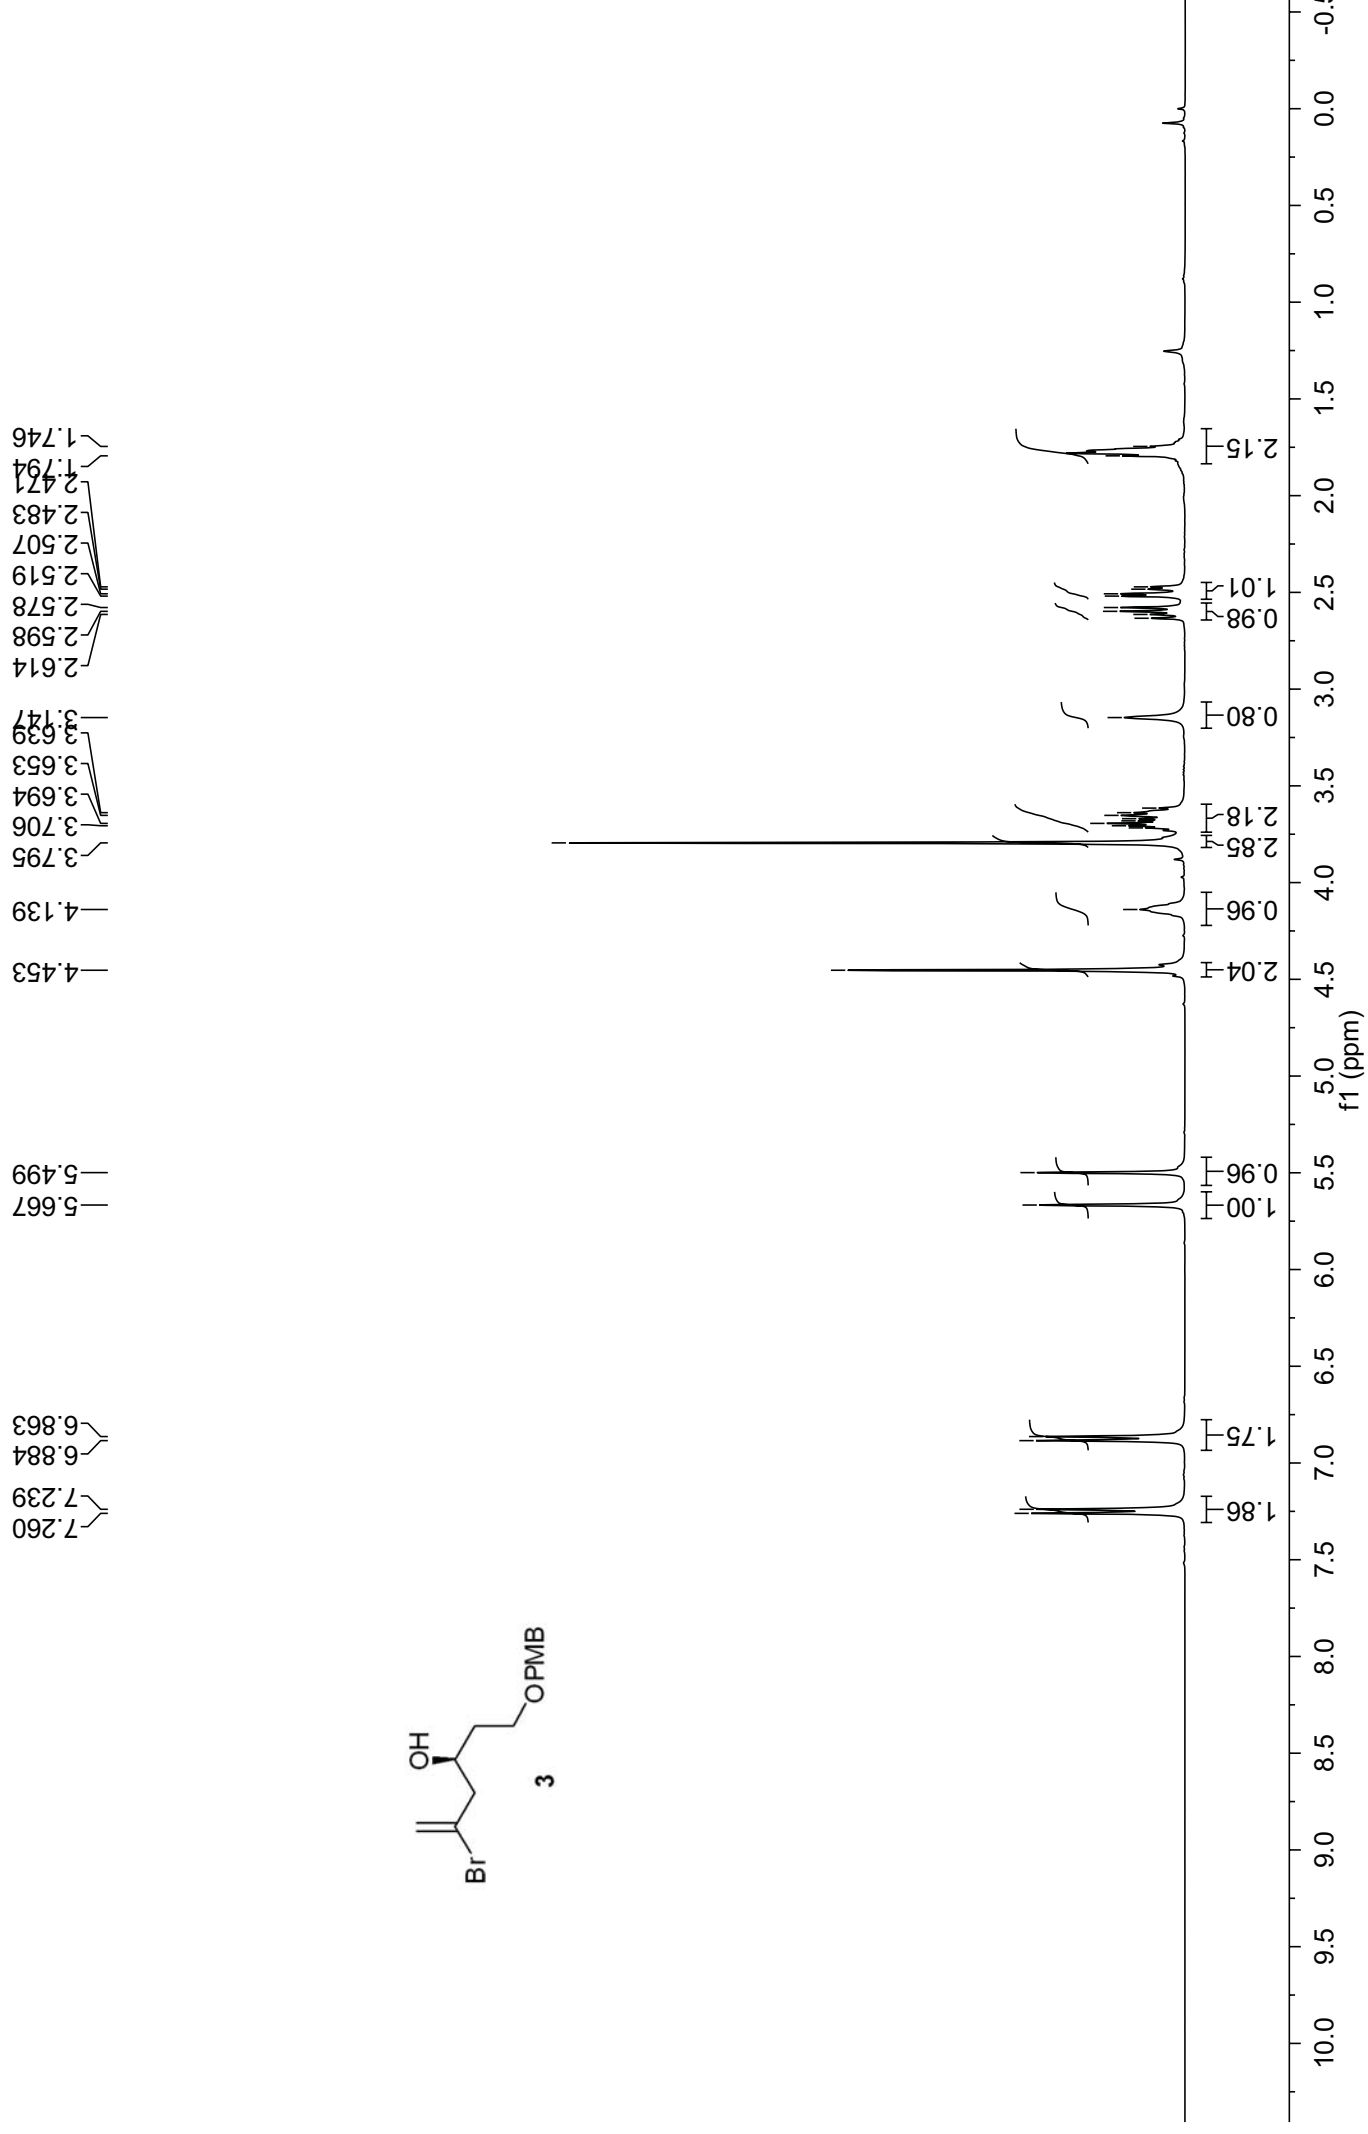

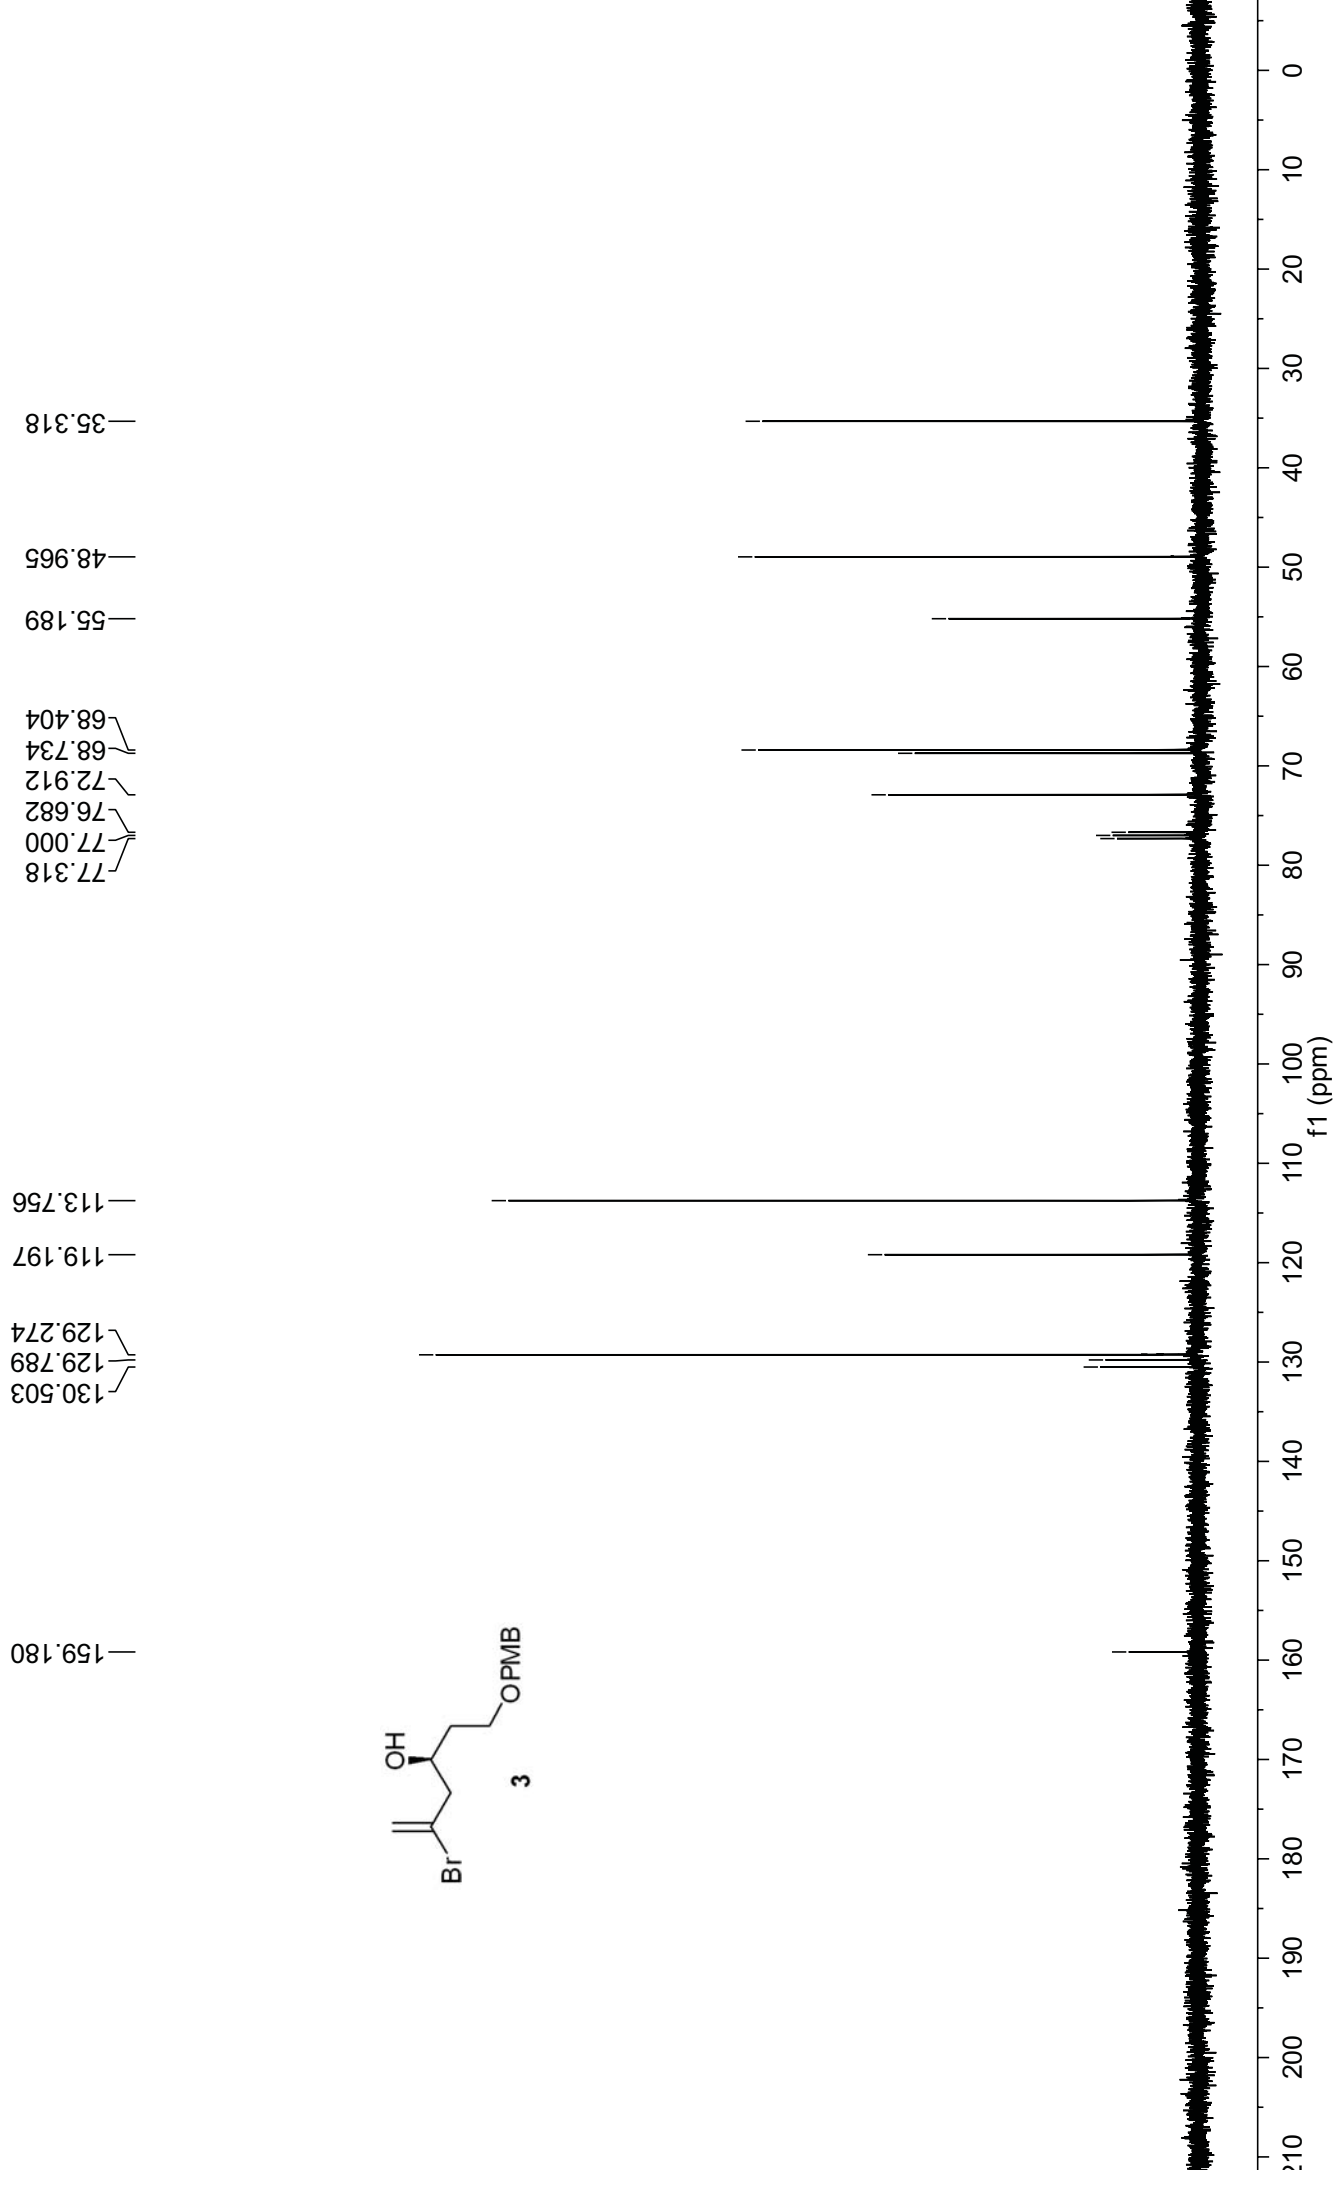



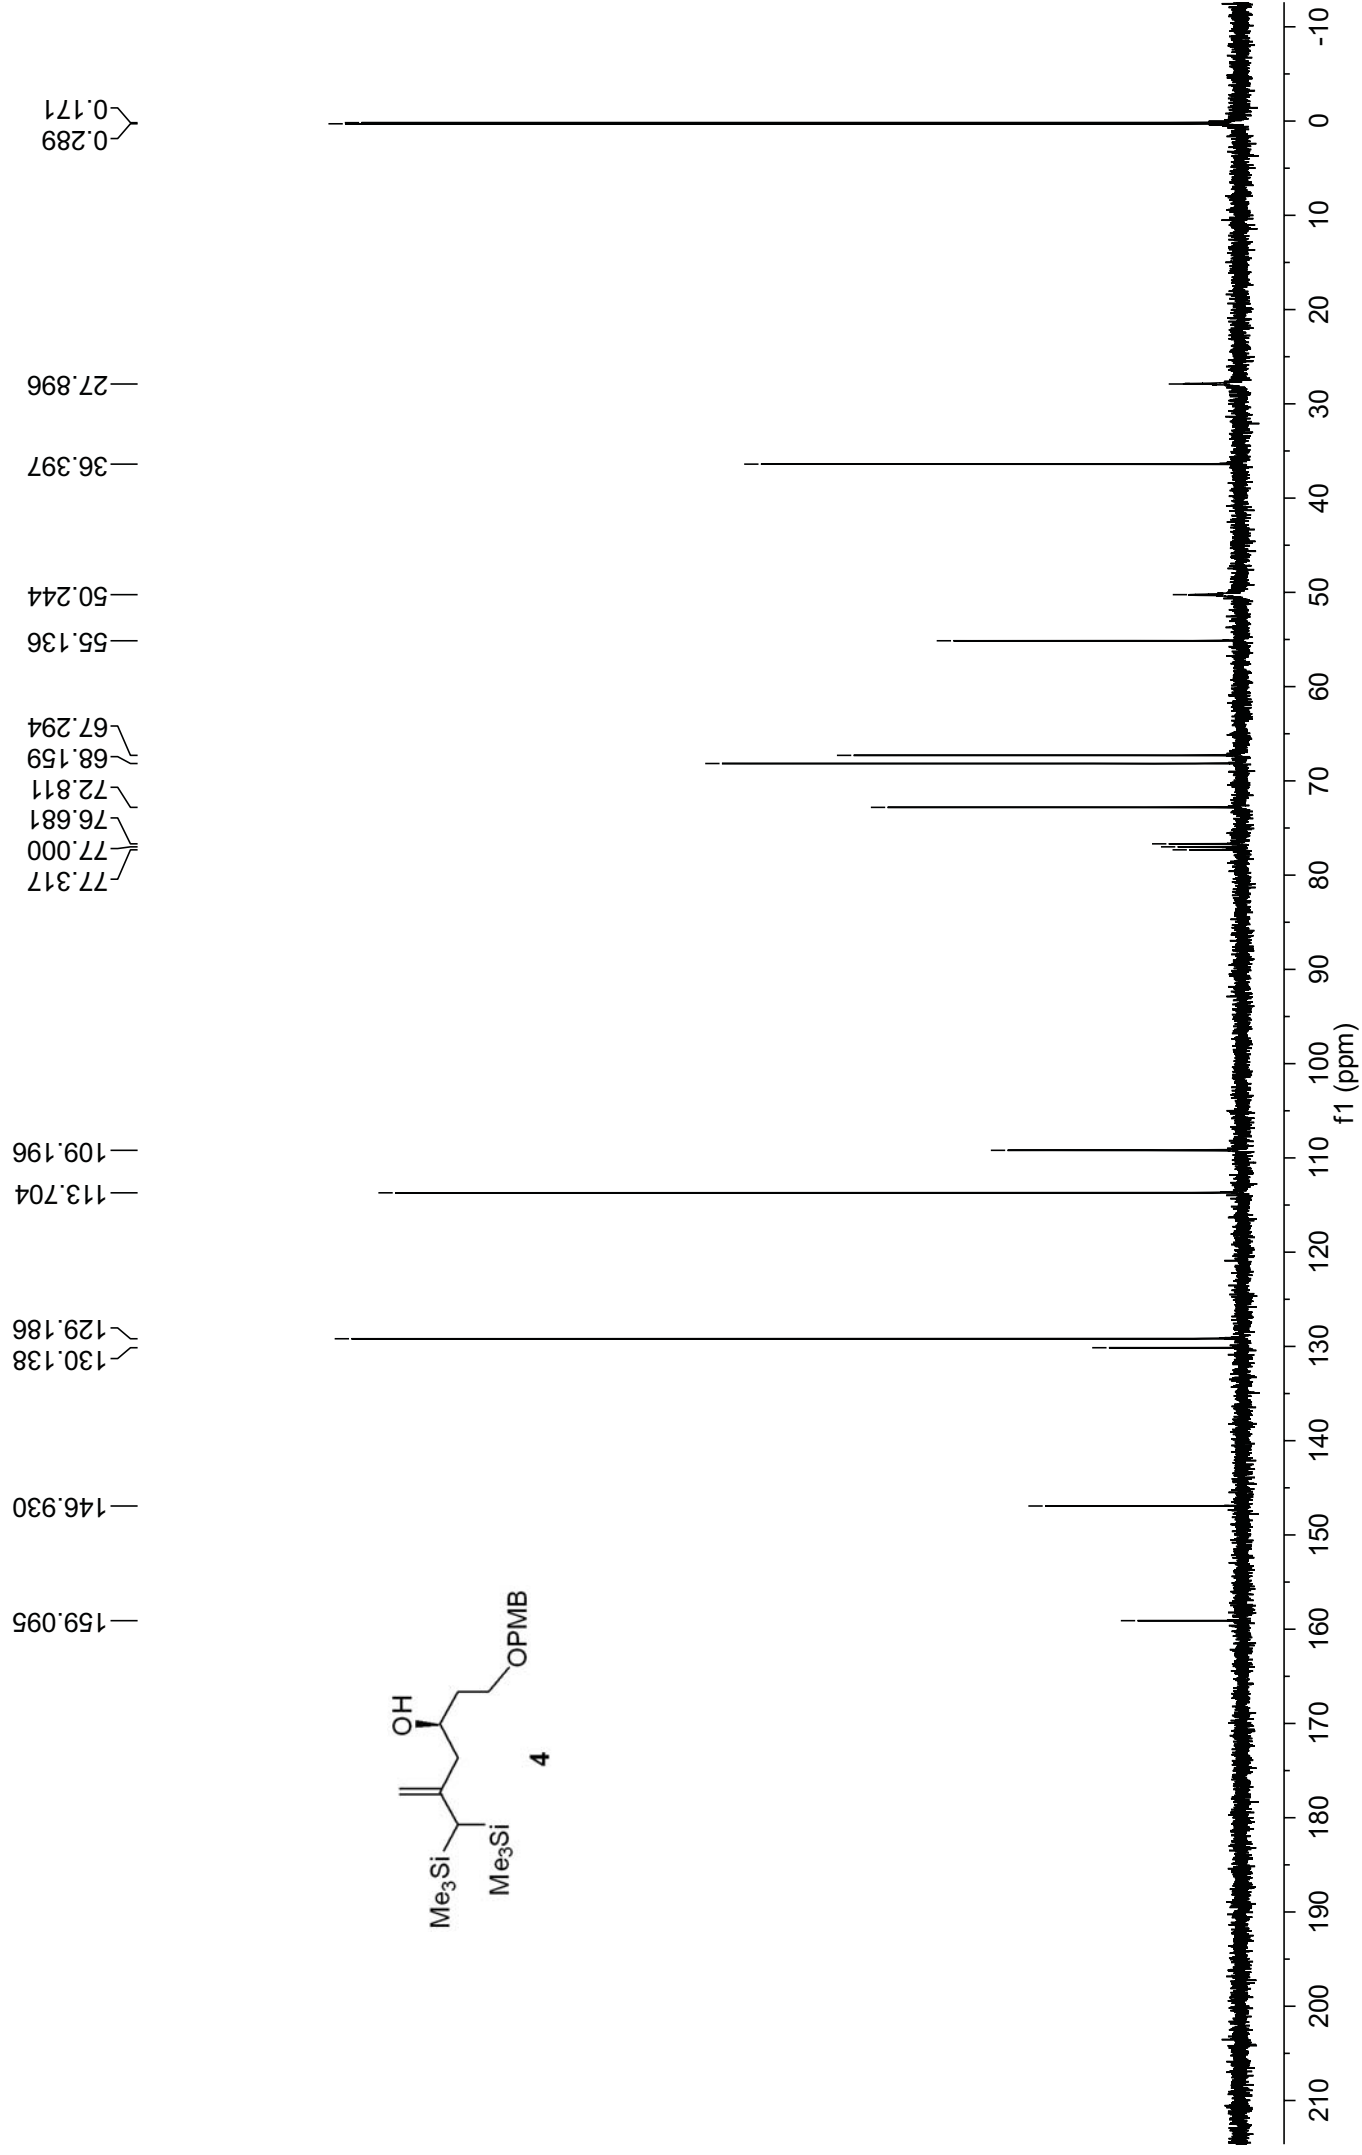

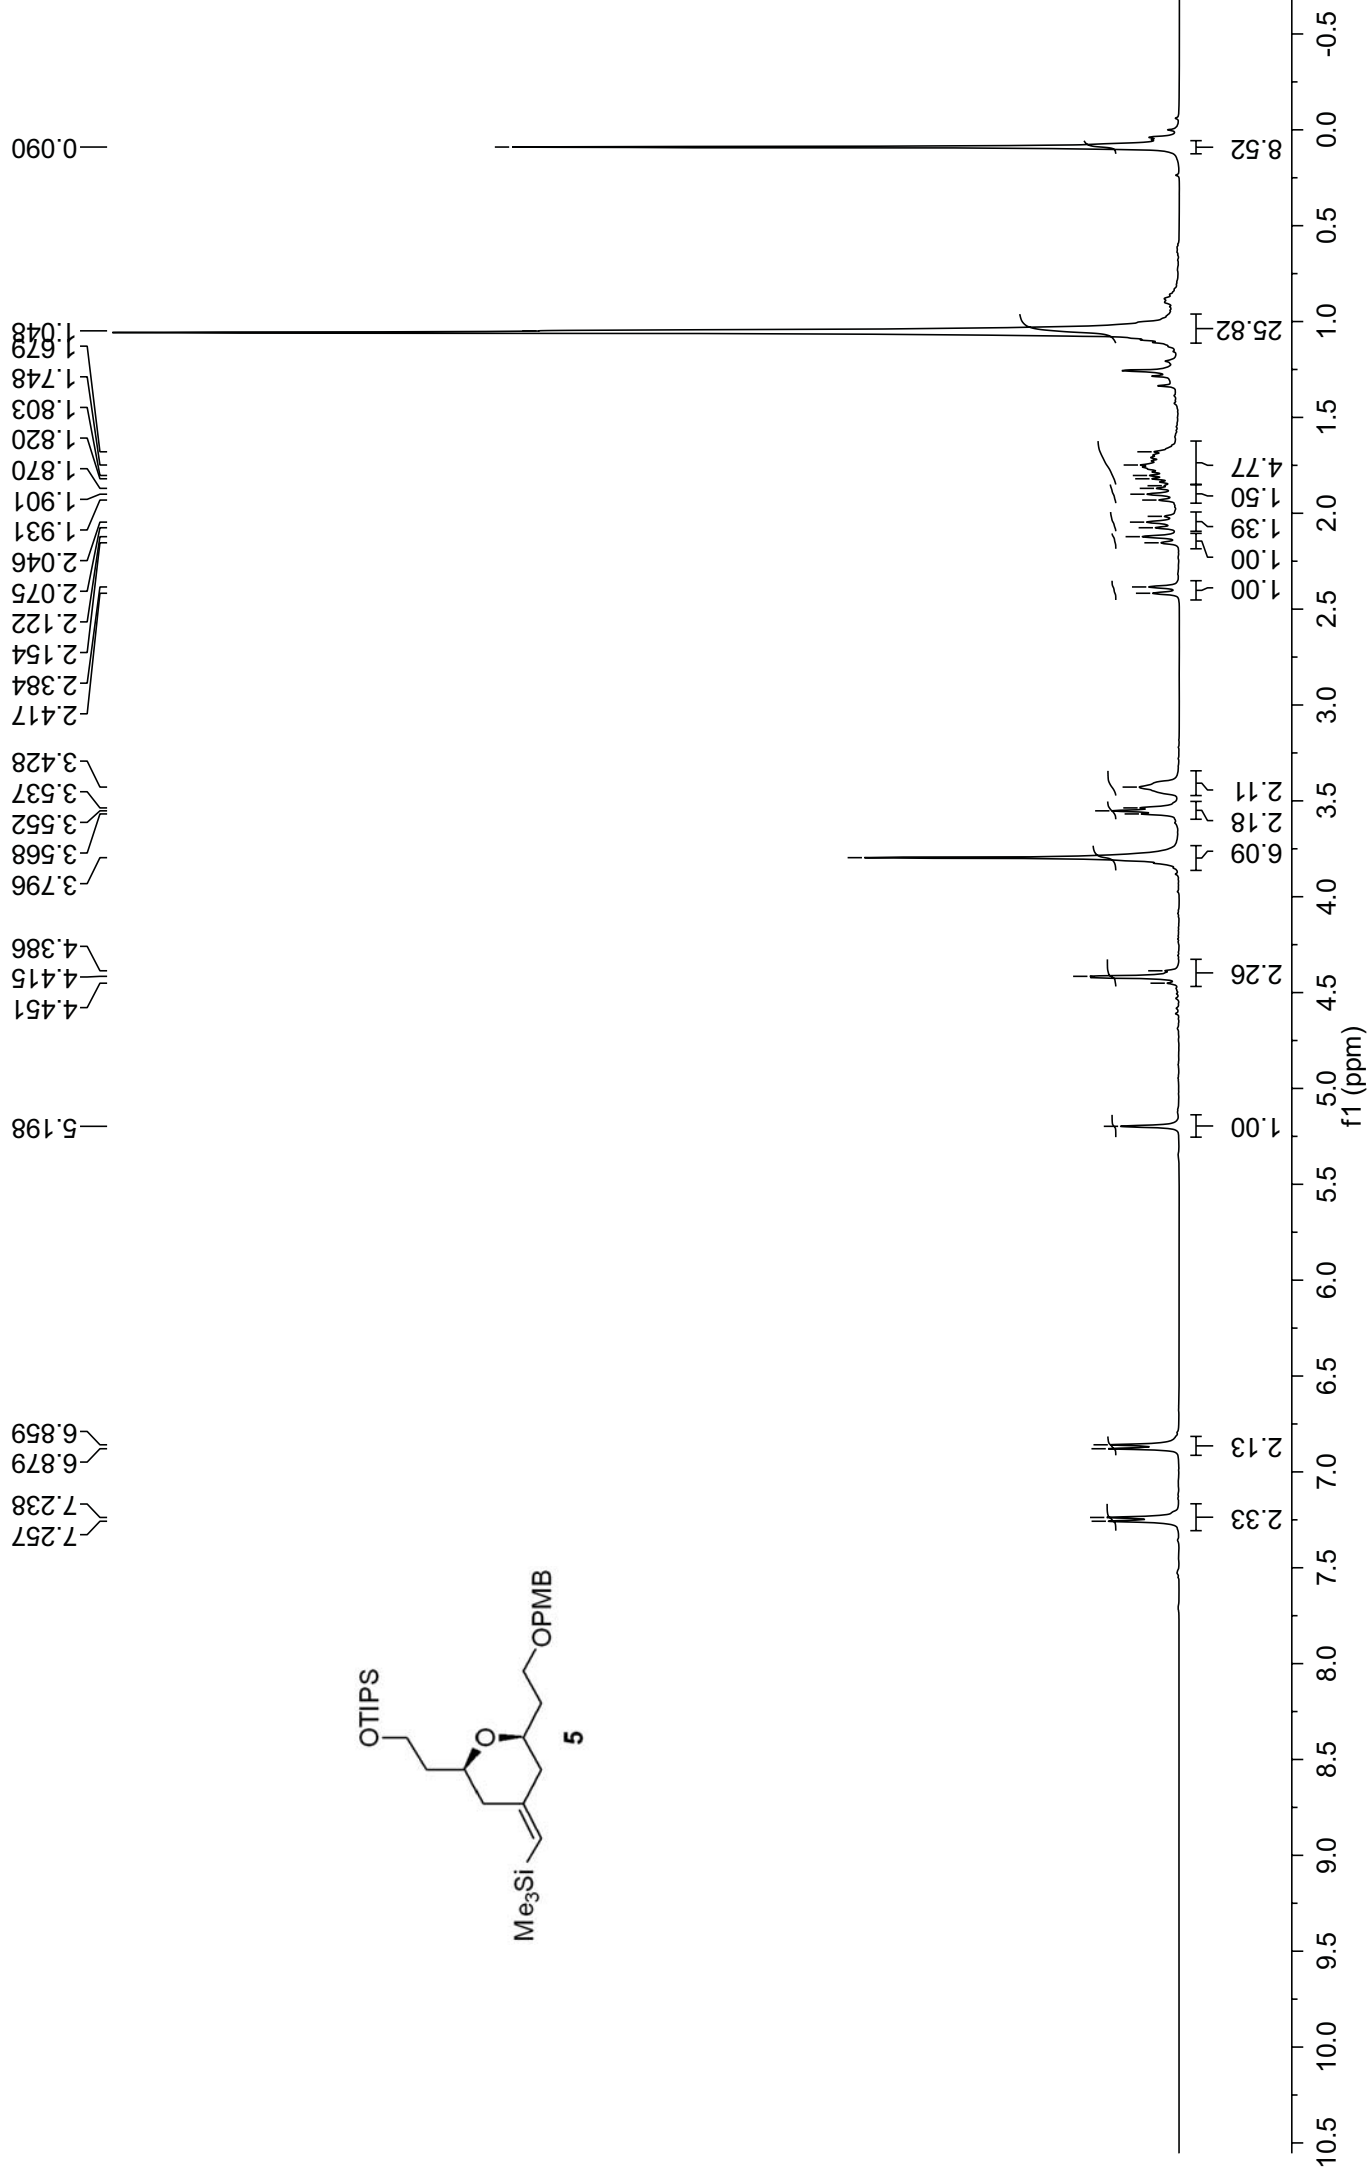

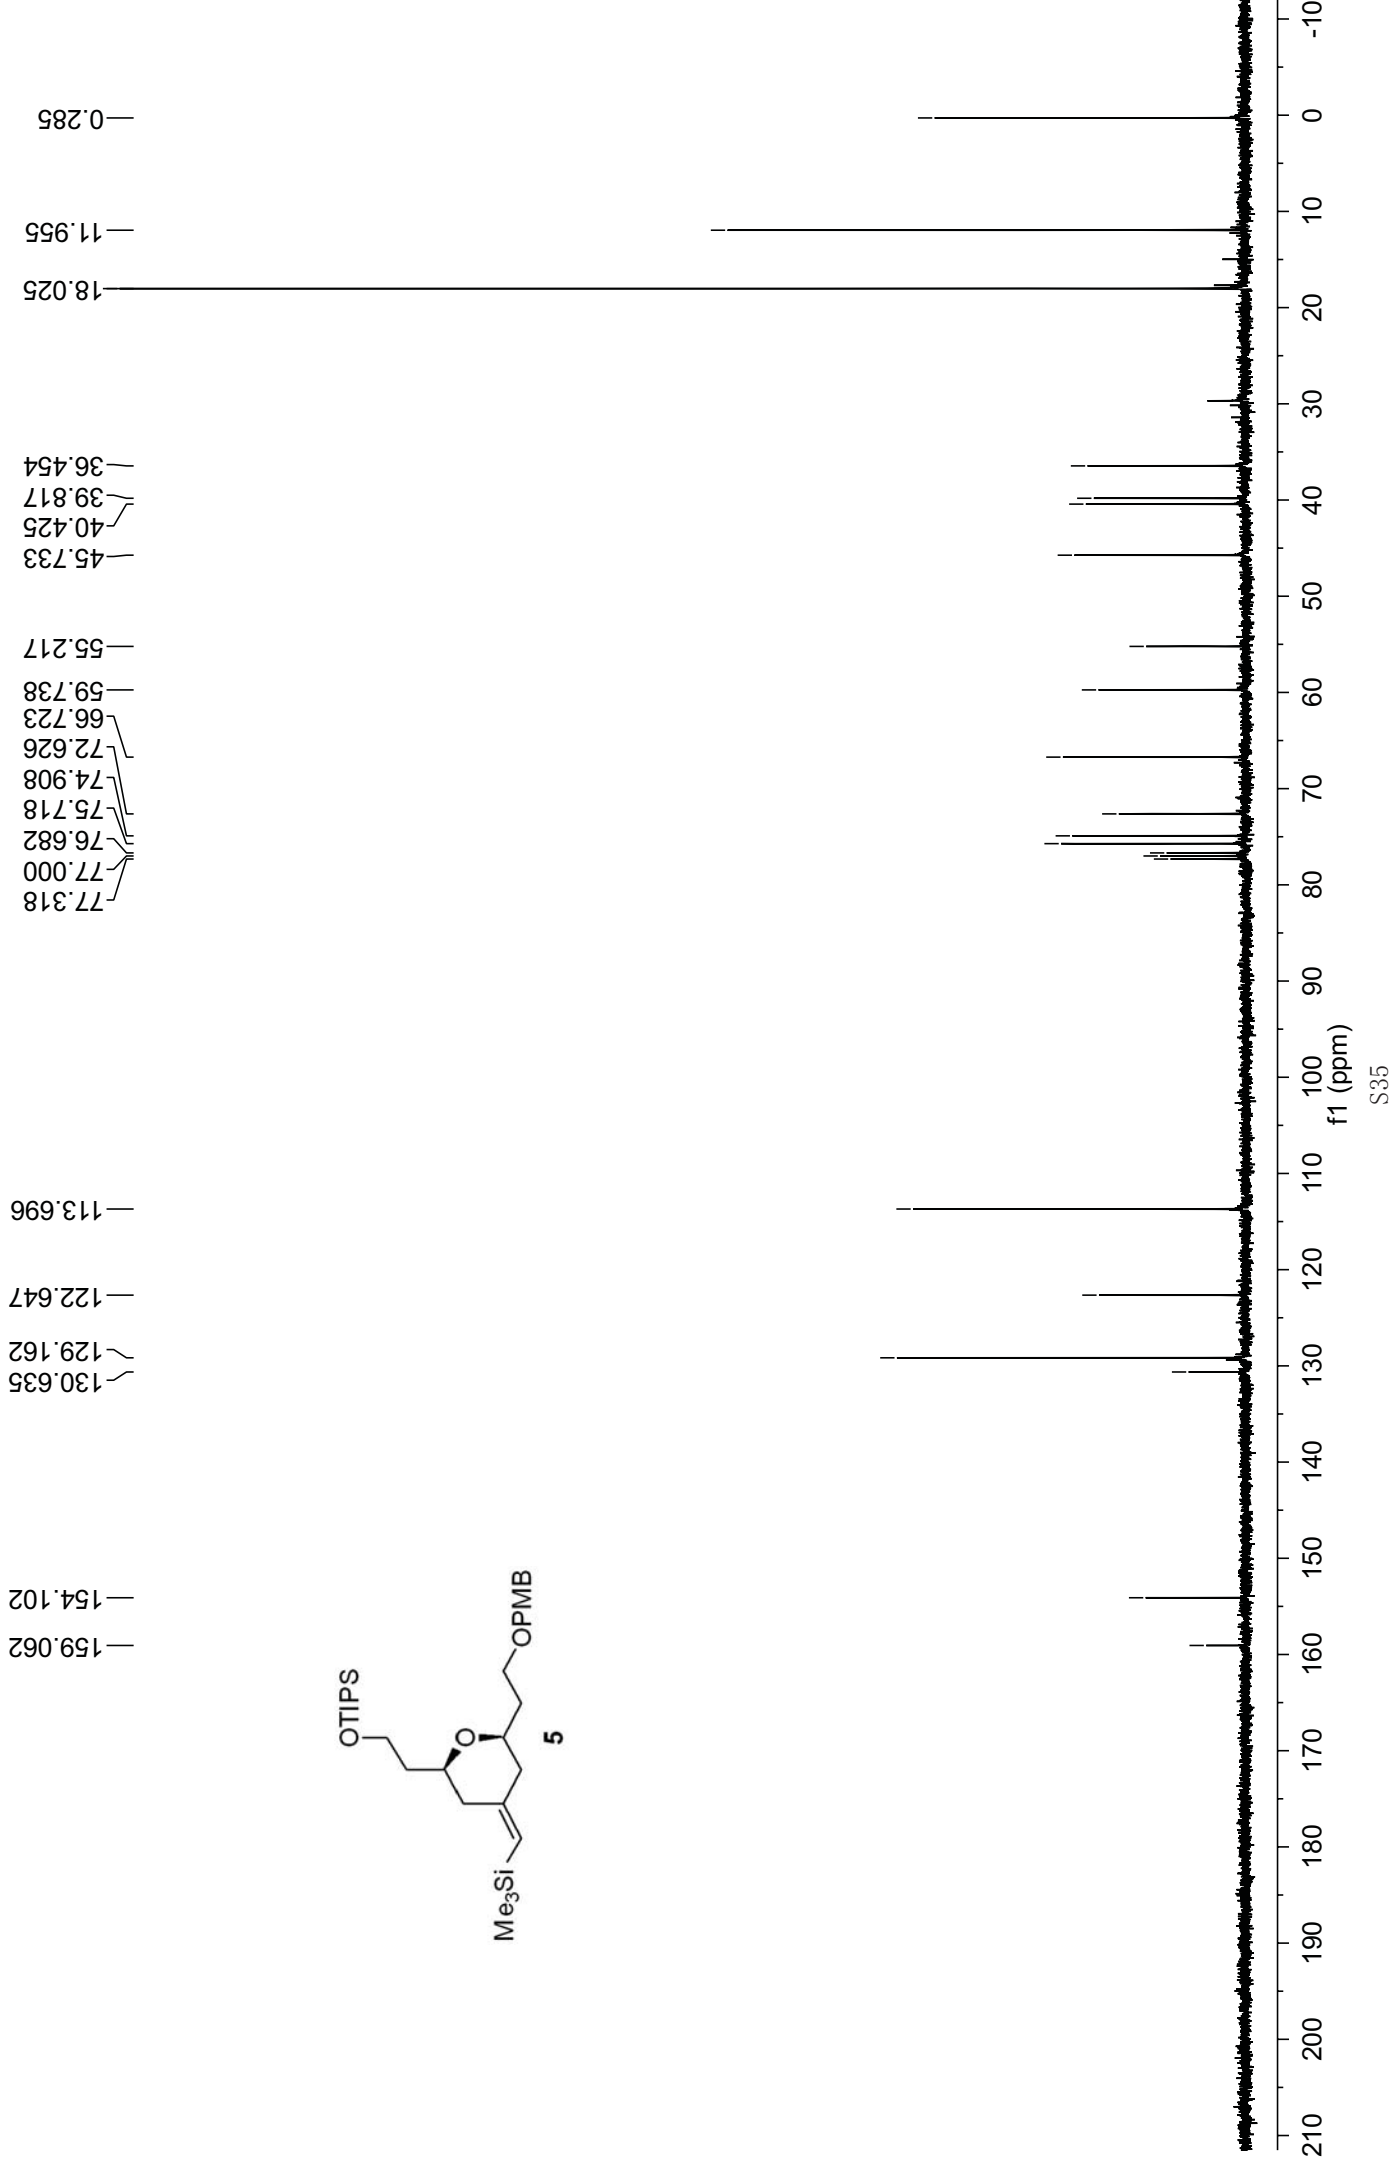

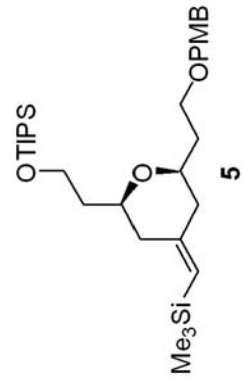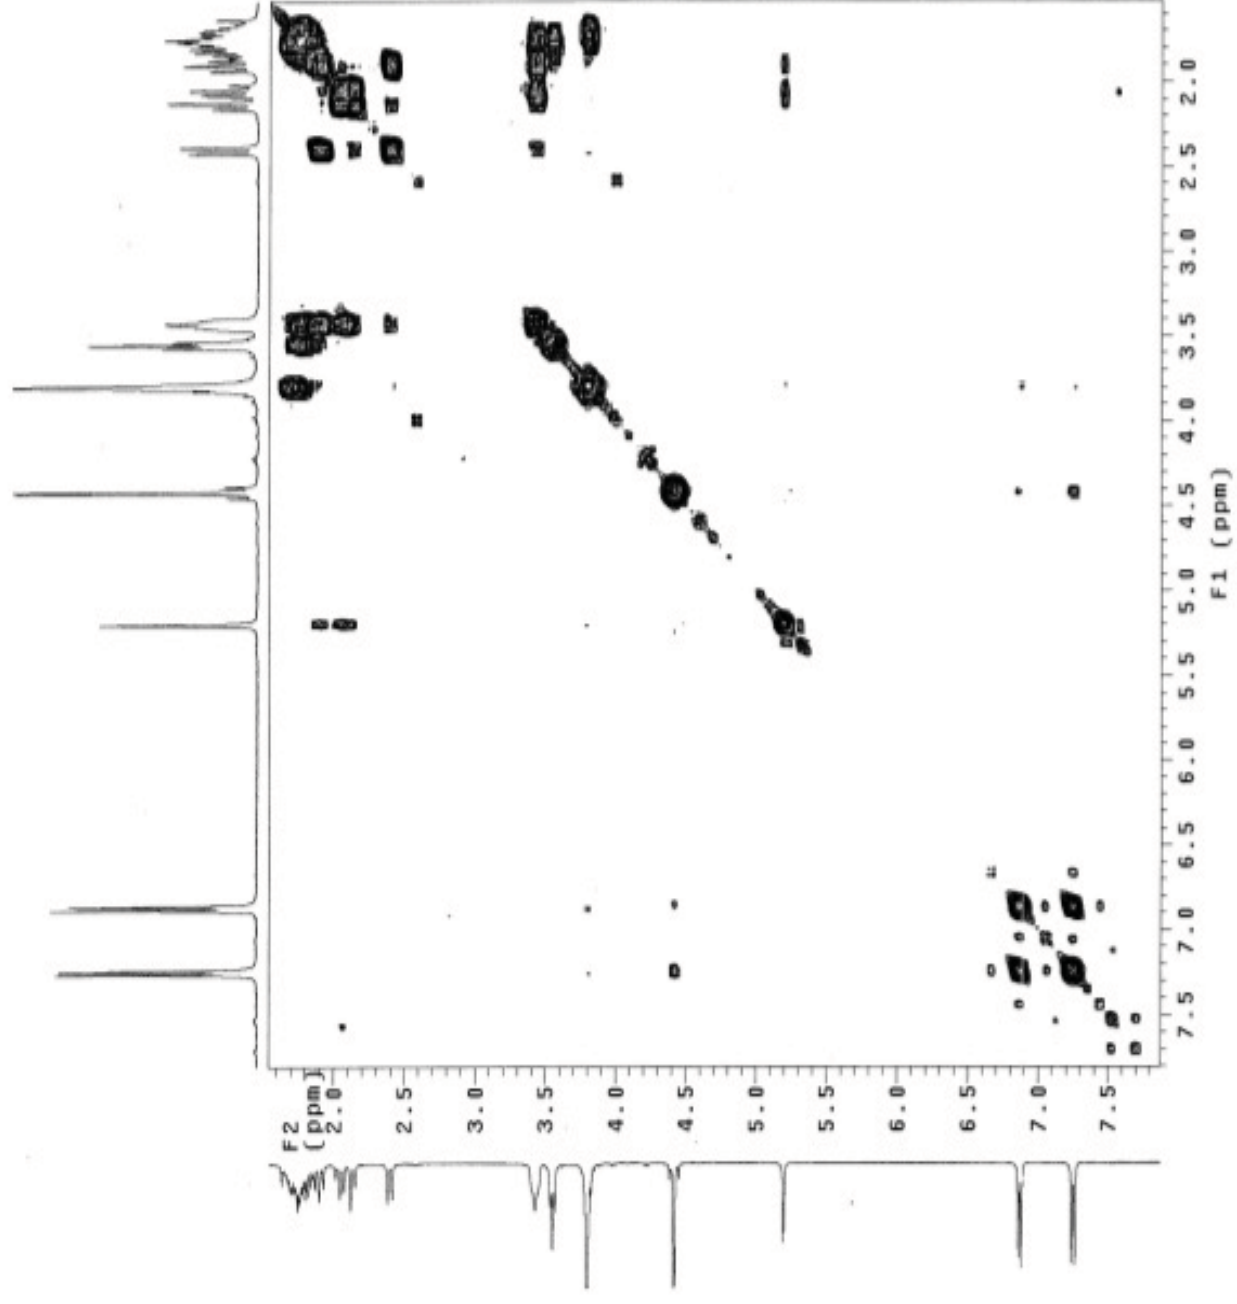

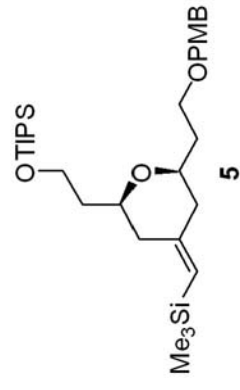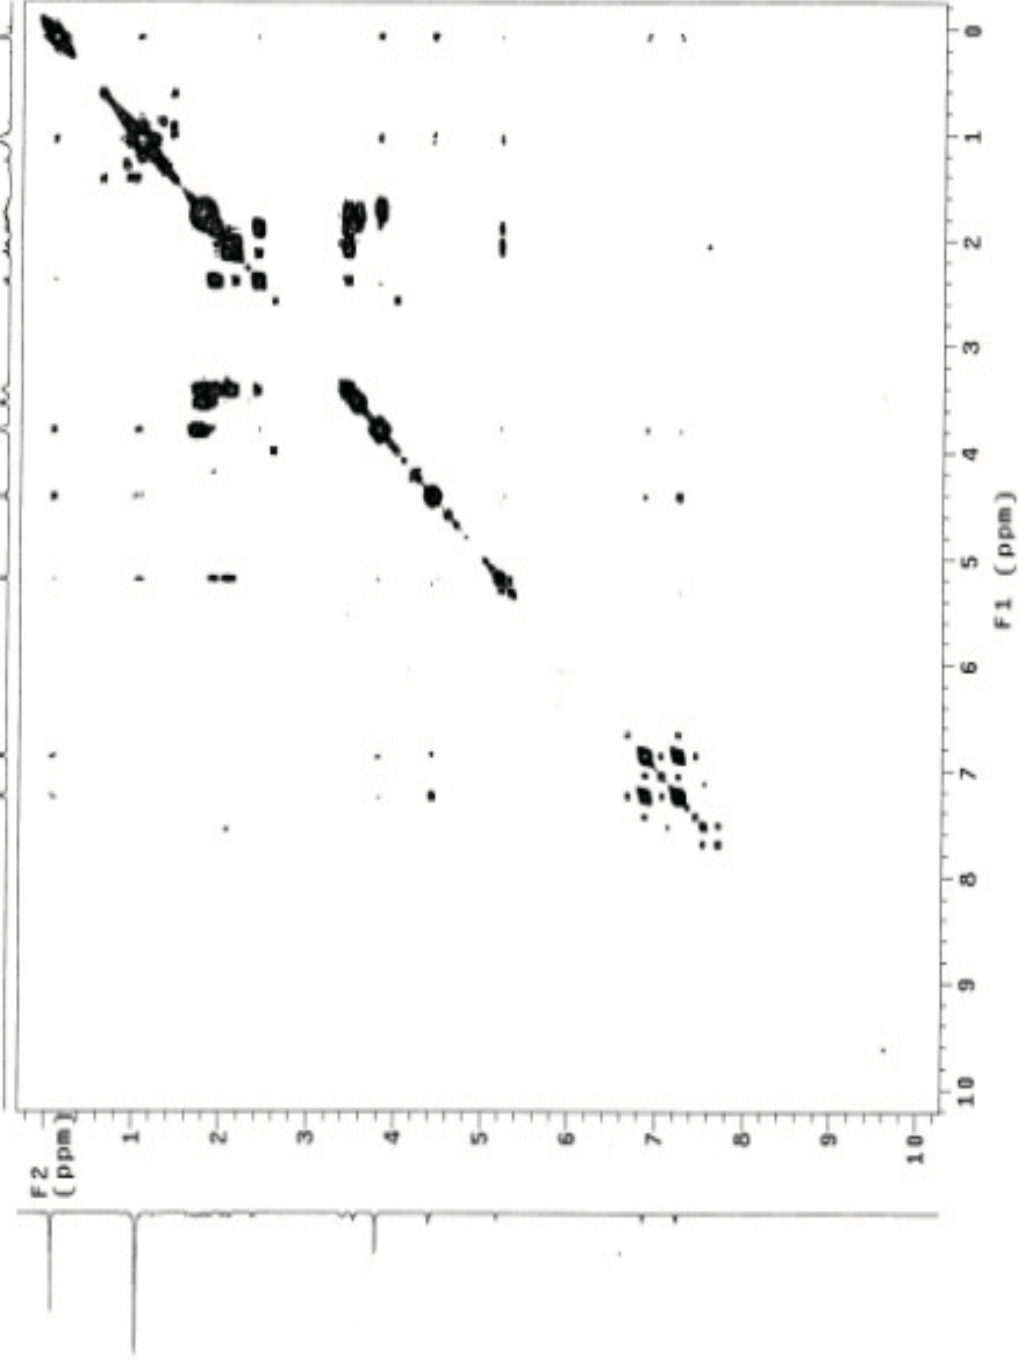

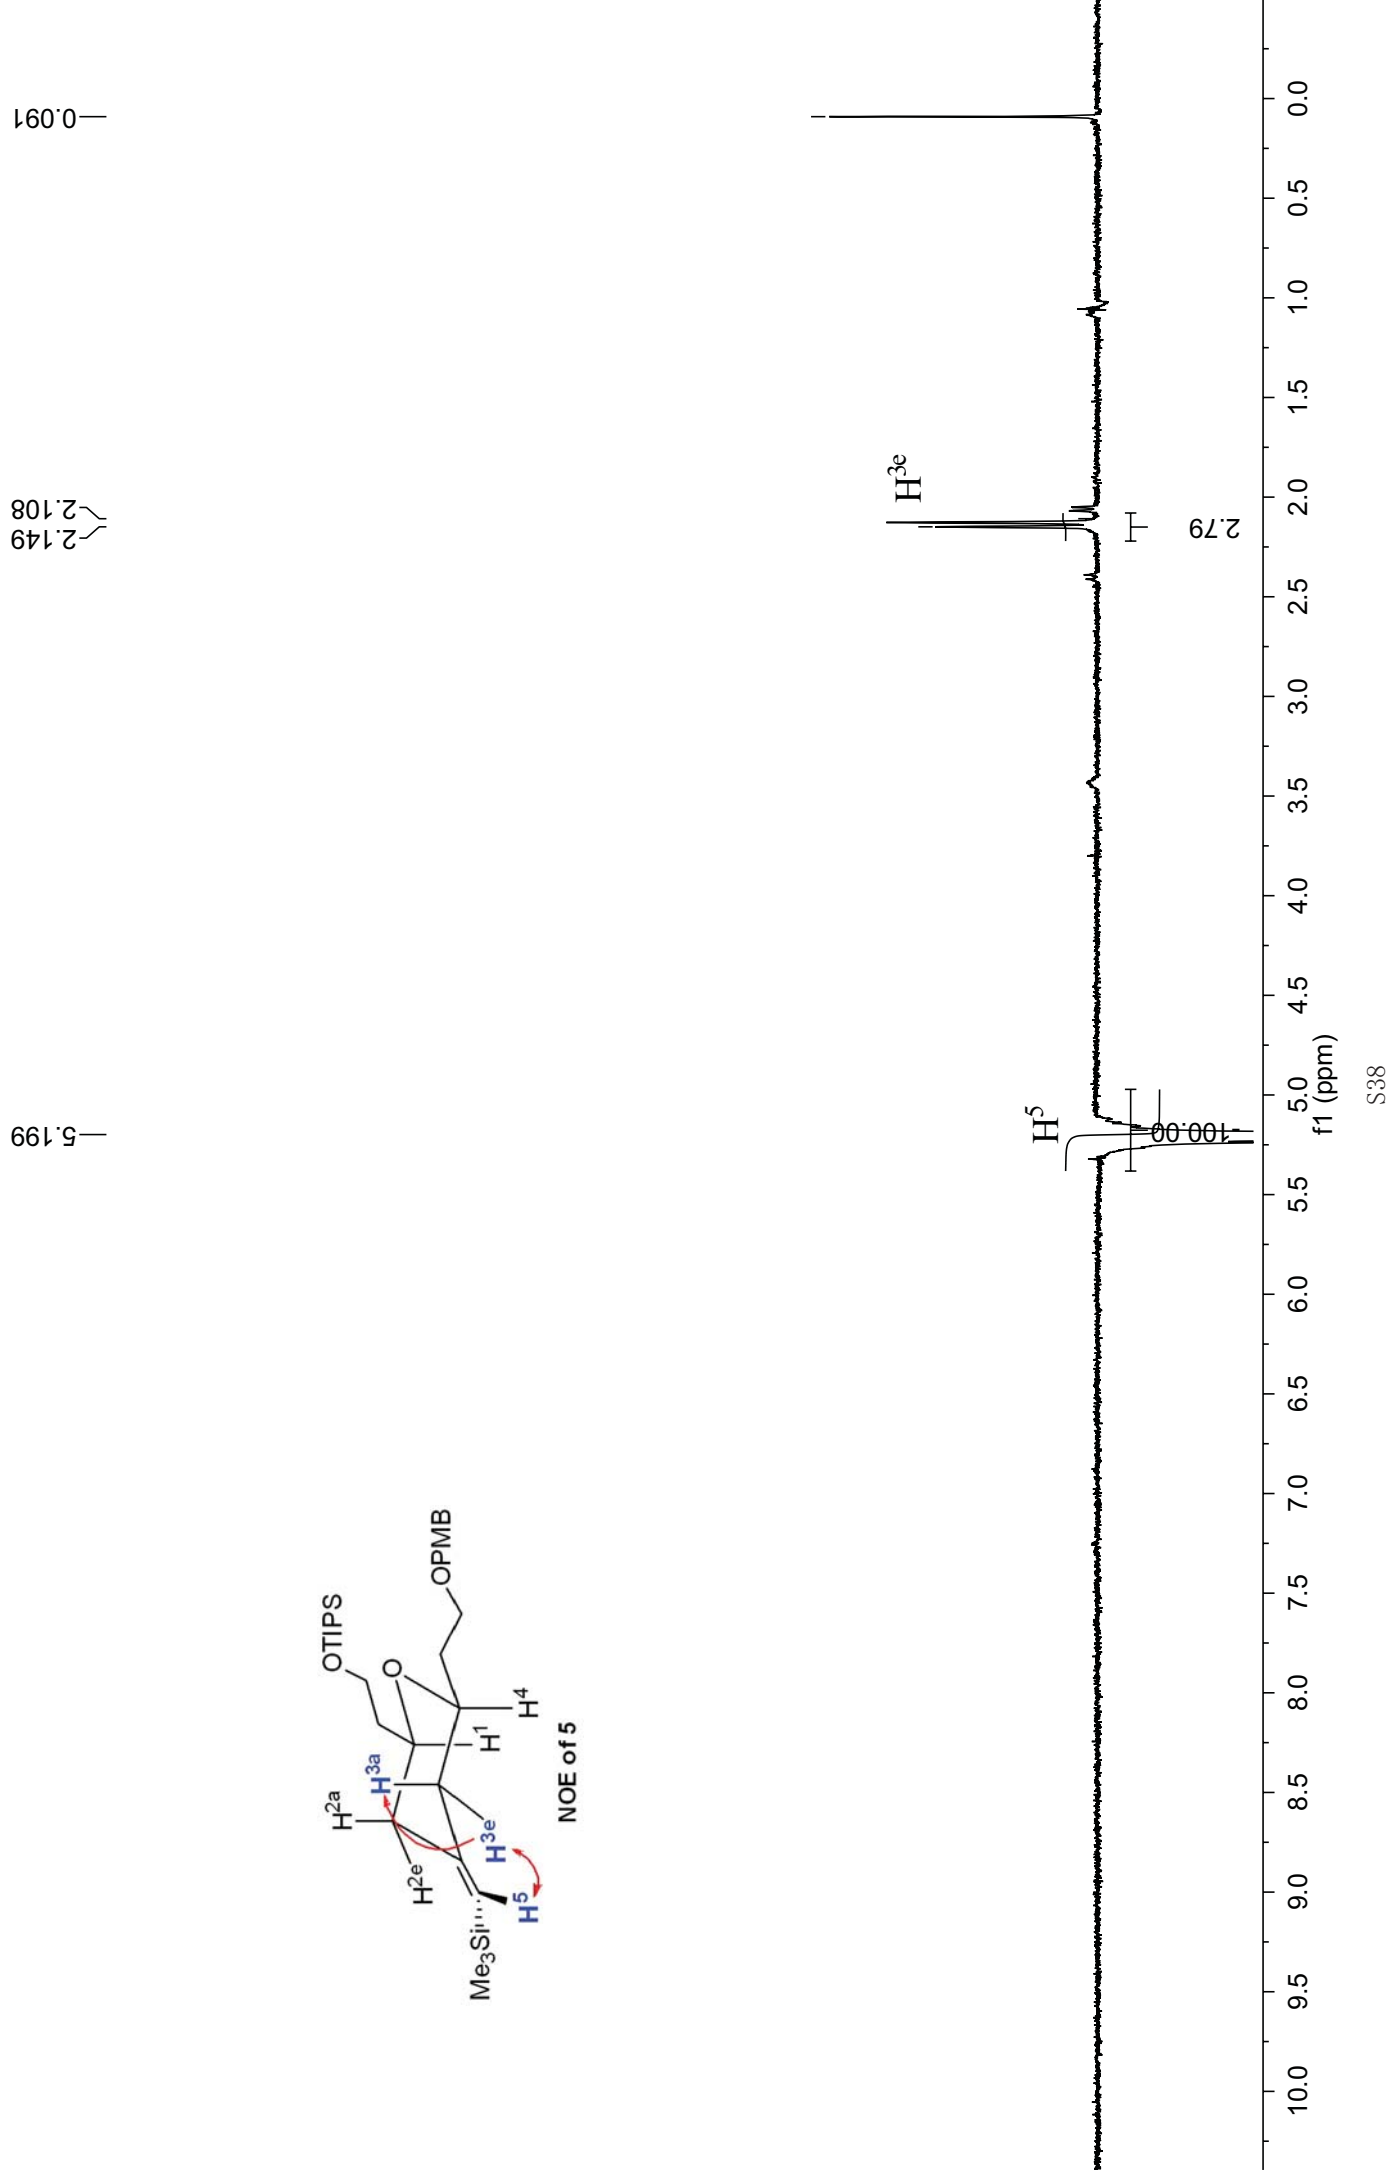

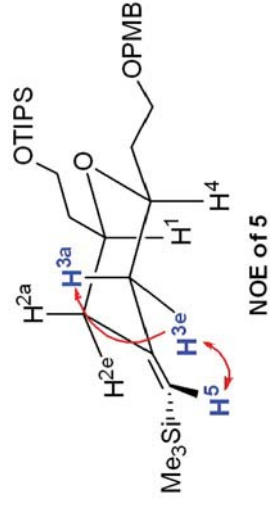

2.149  
2.127  
2.047  
2.028

5.199

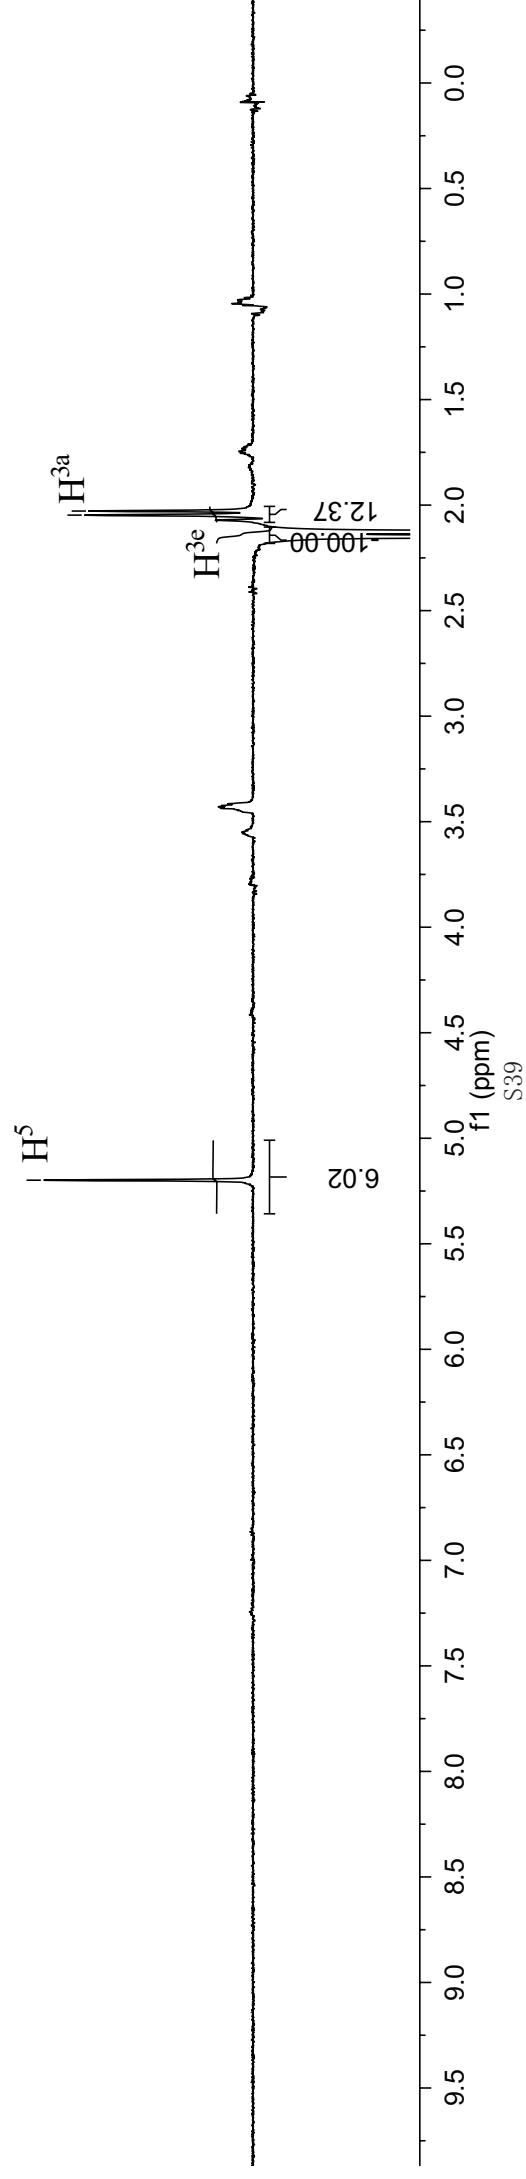

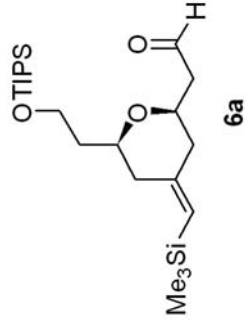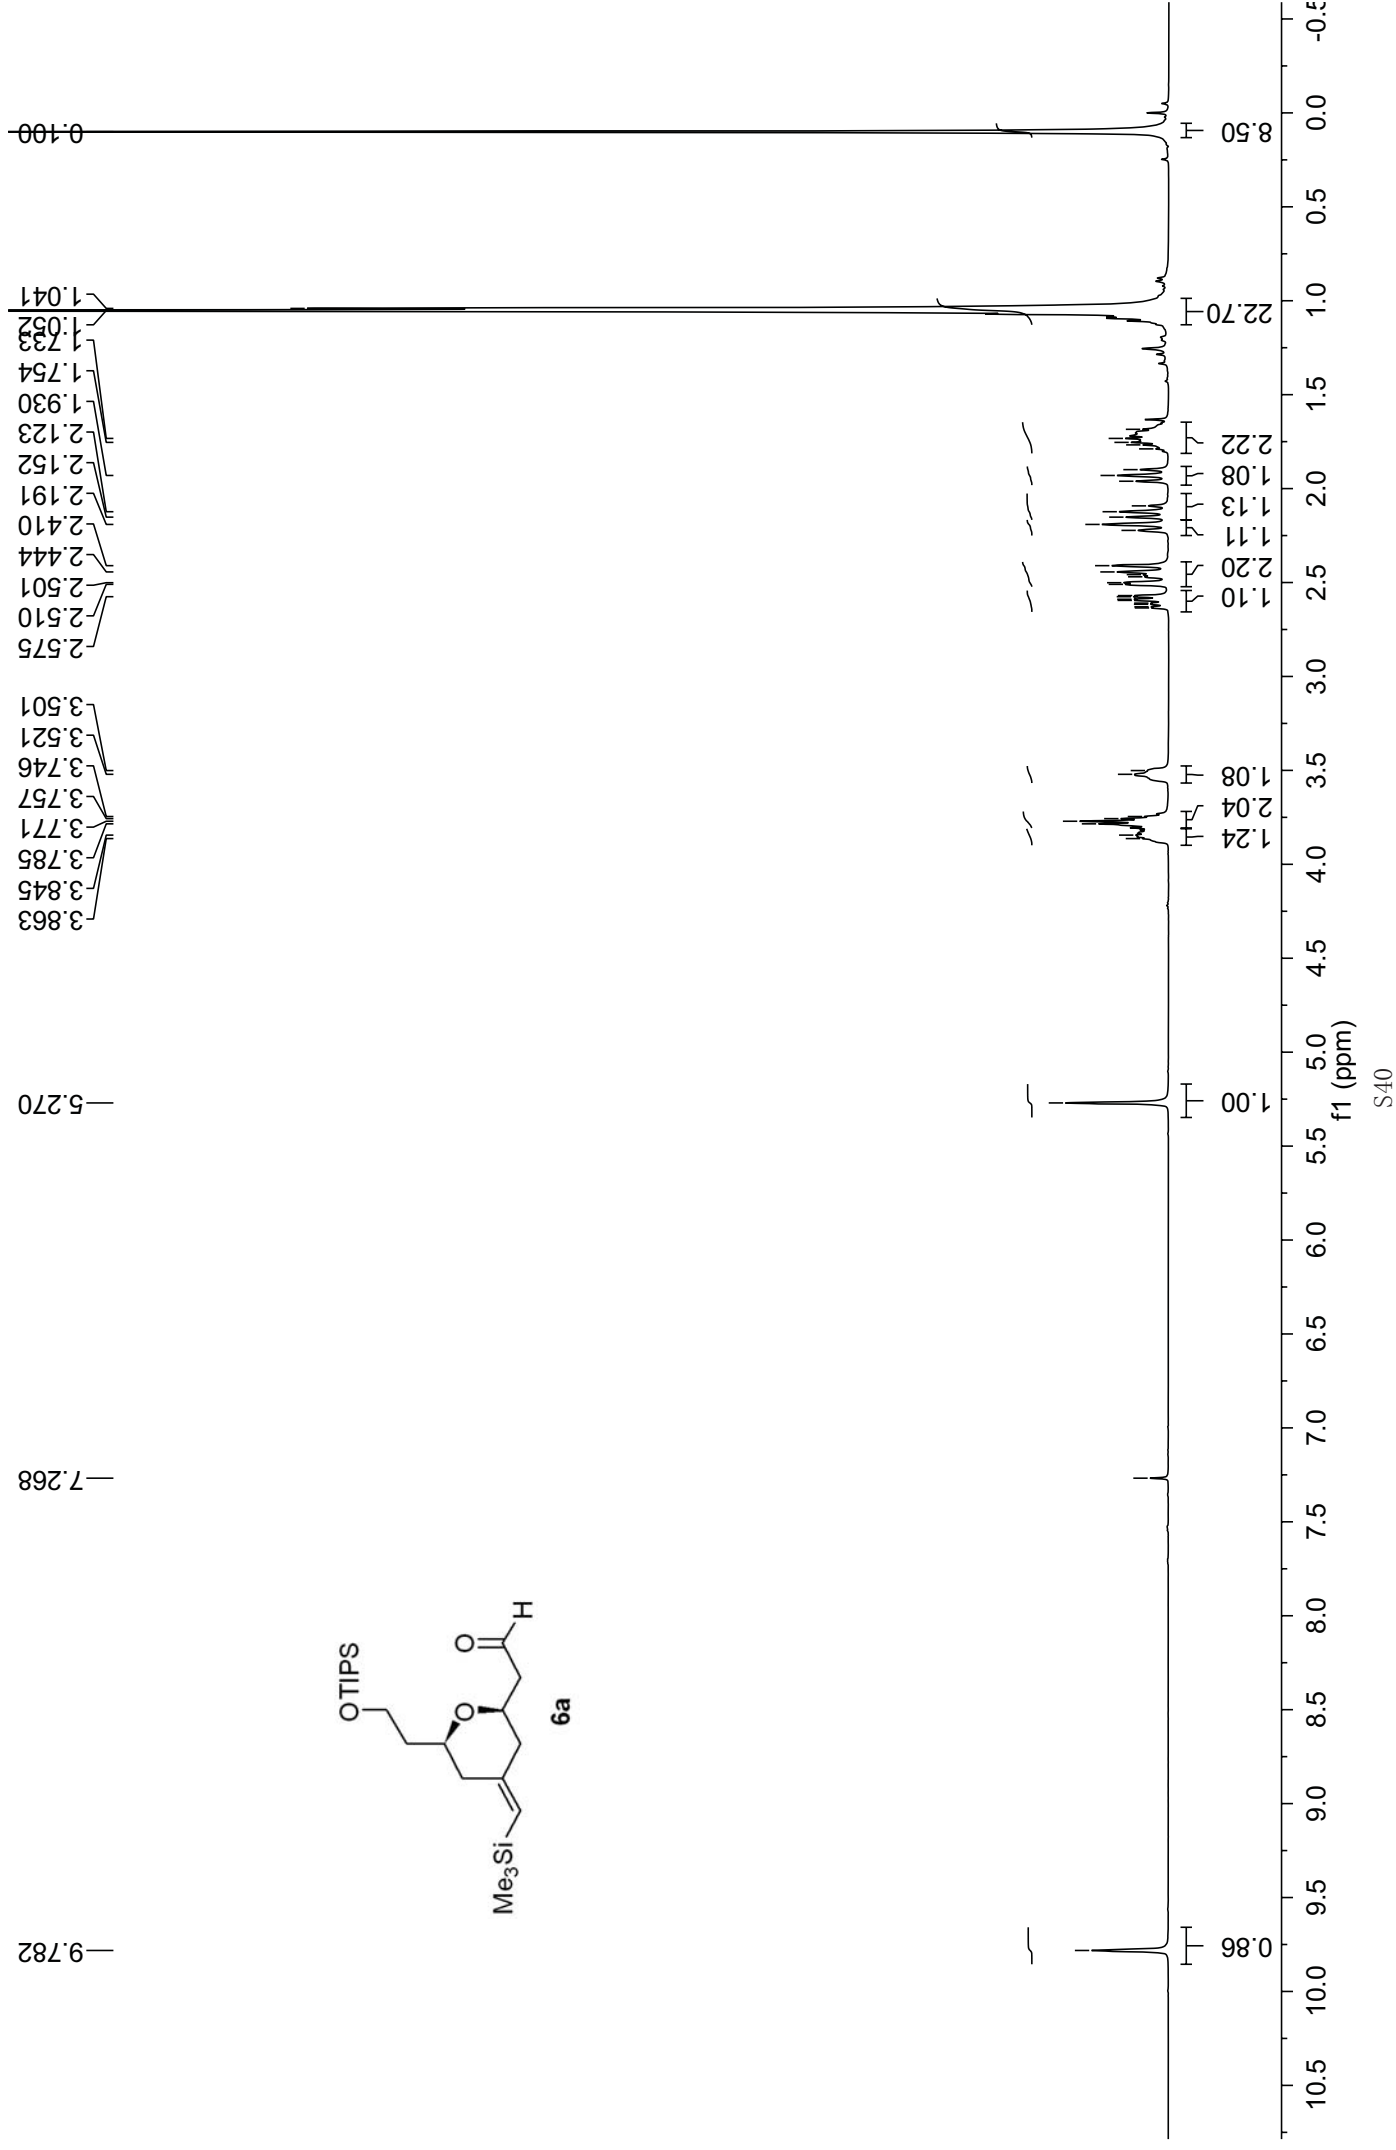

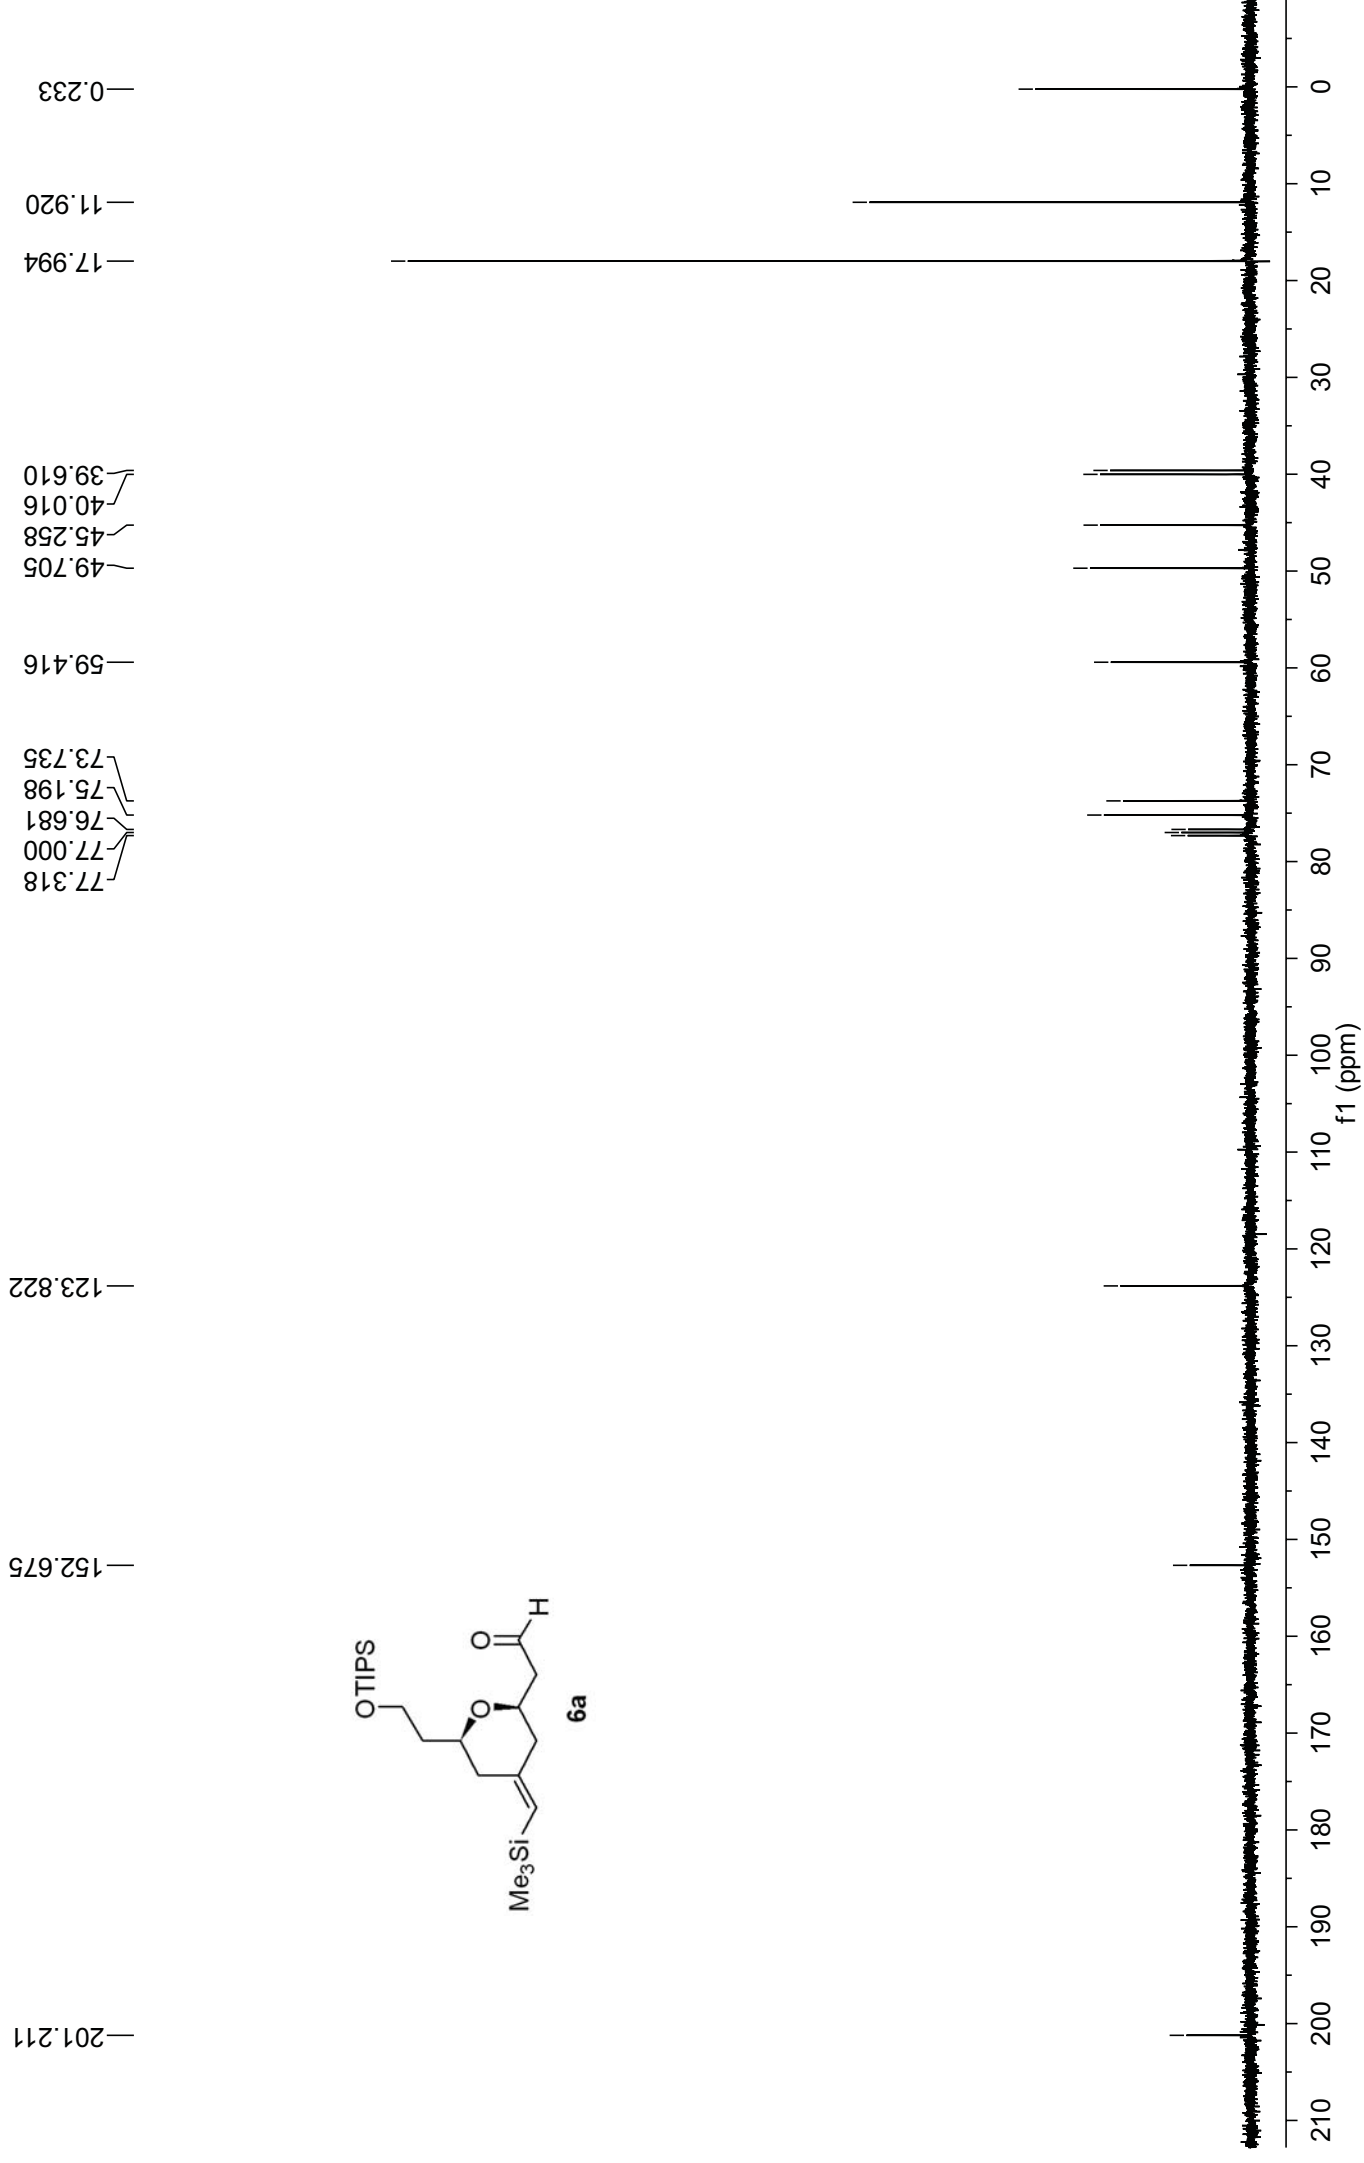

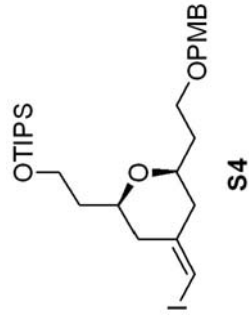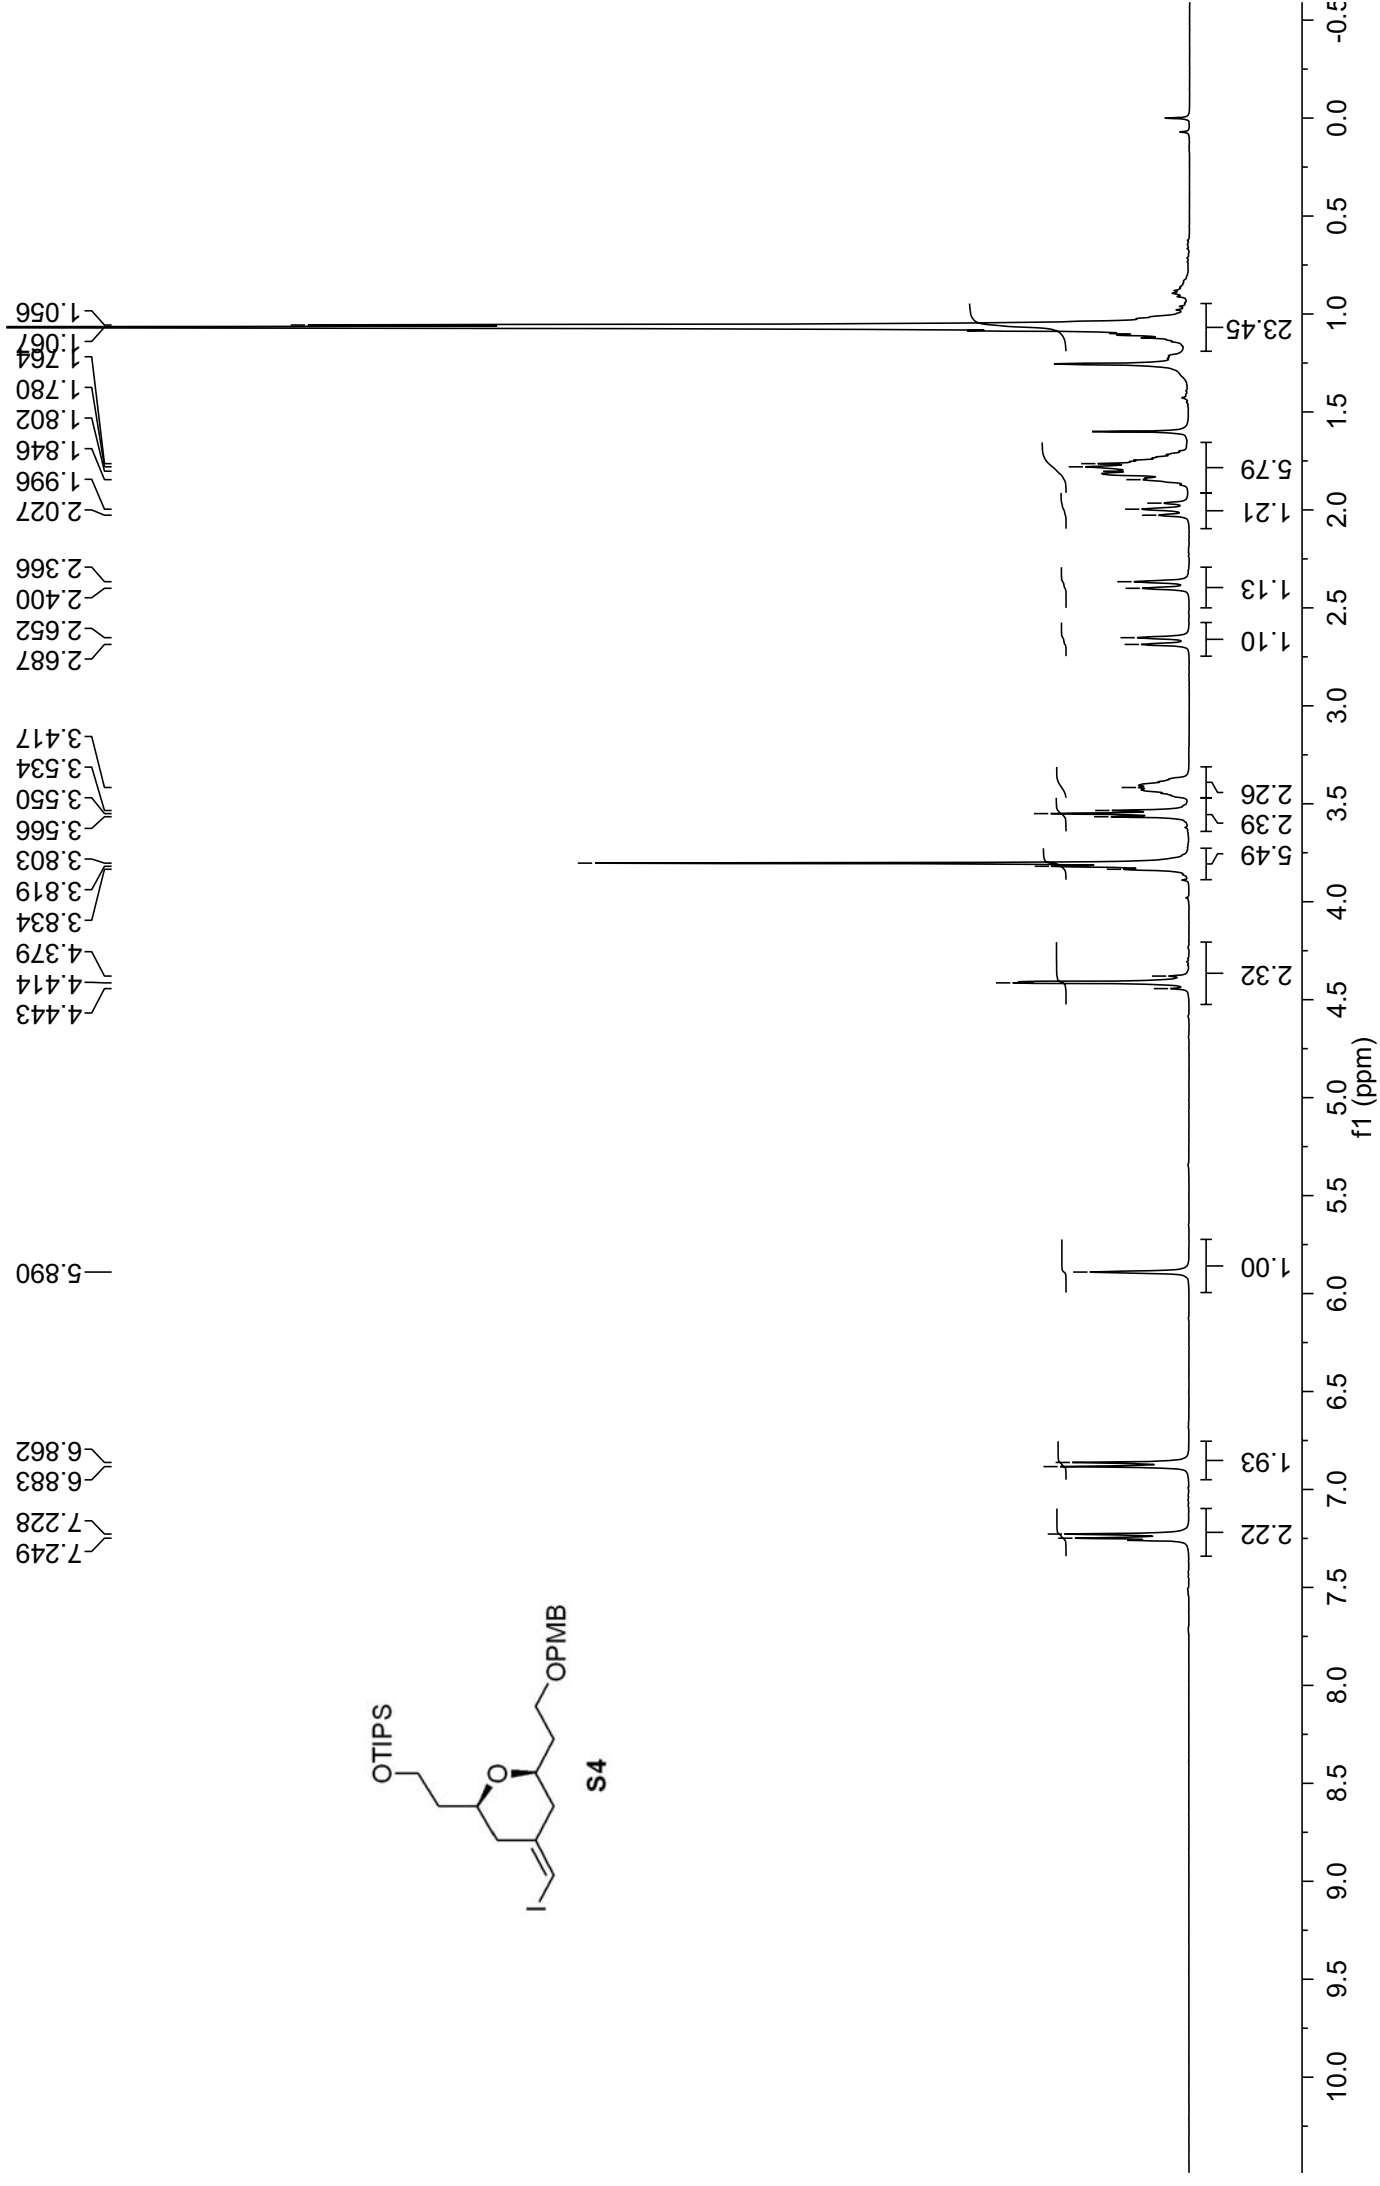

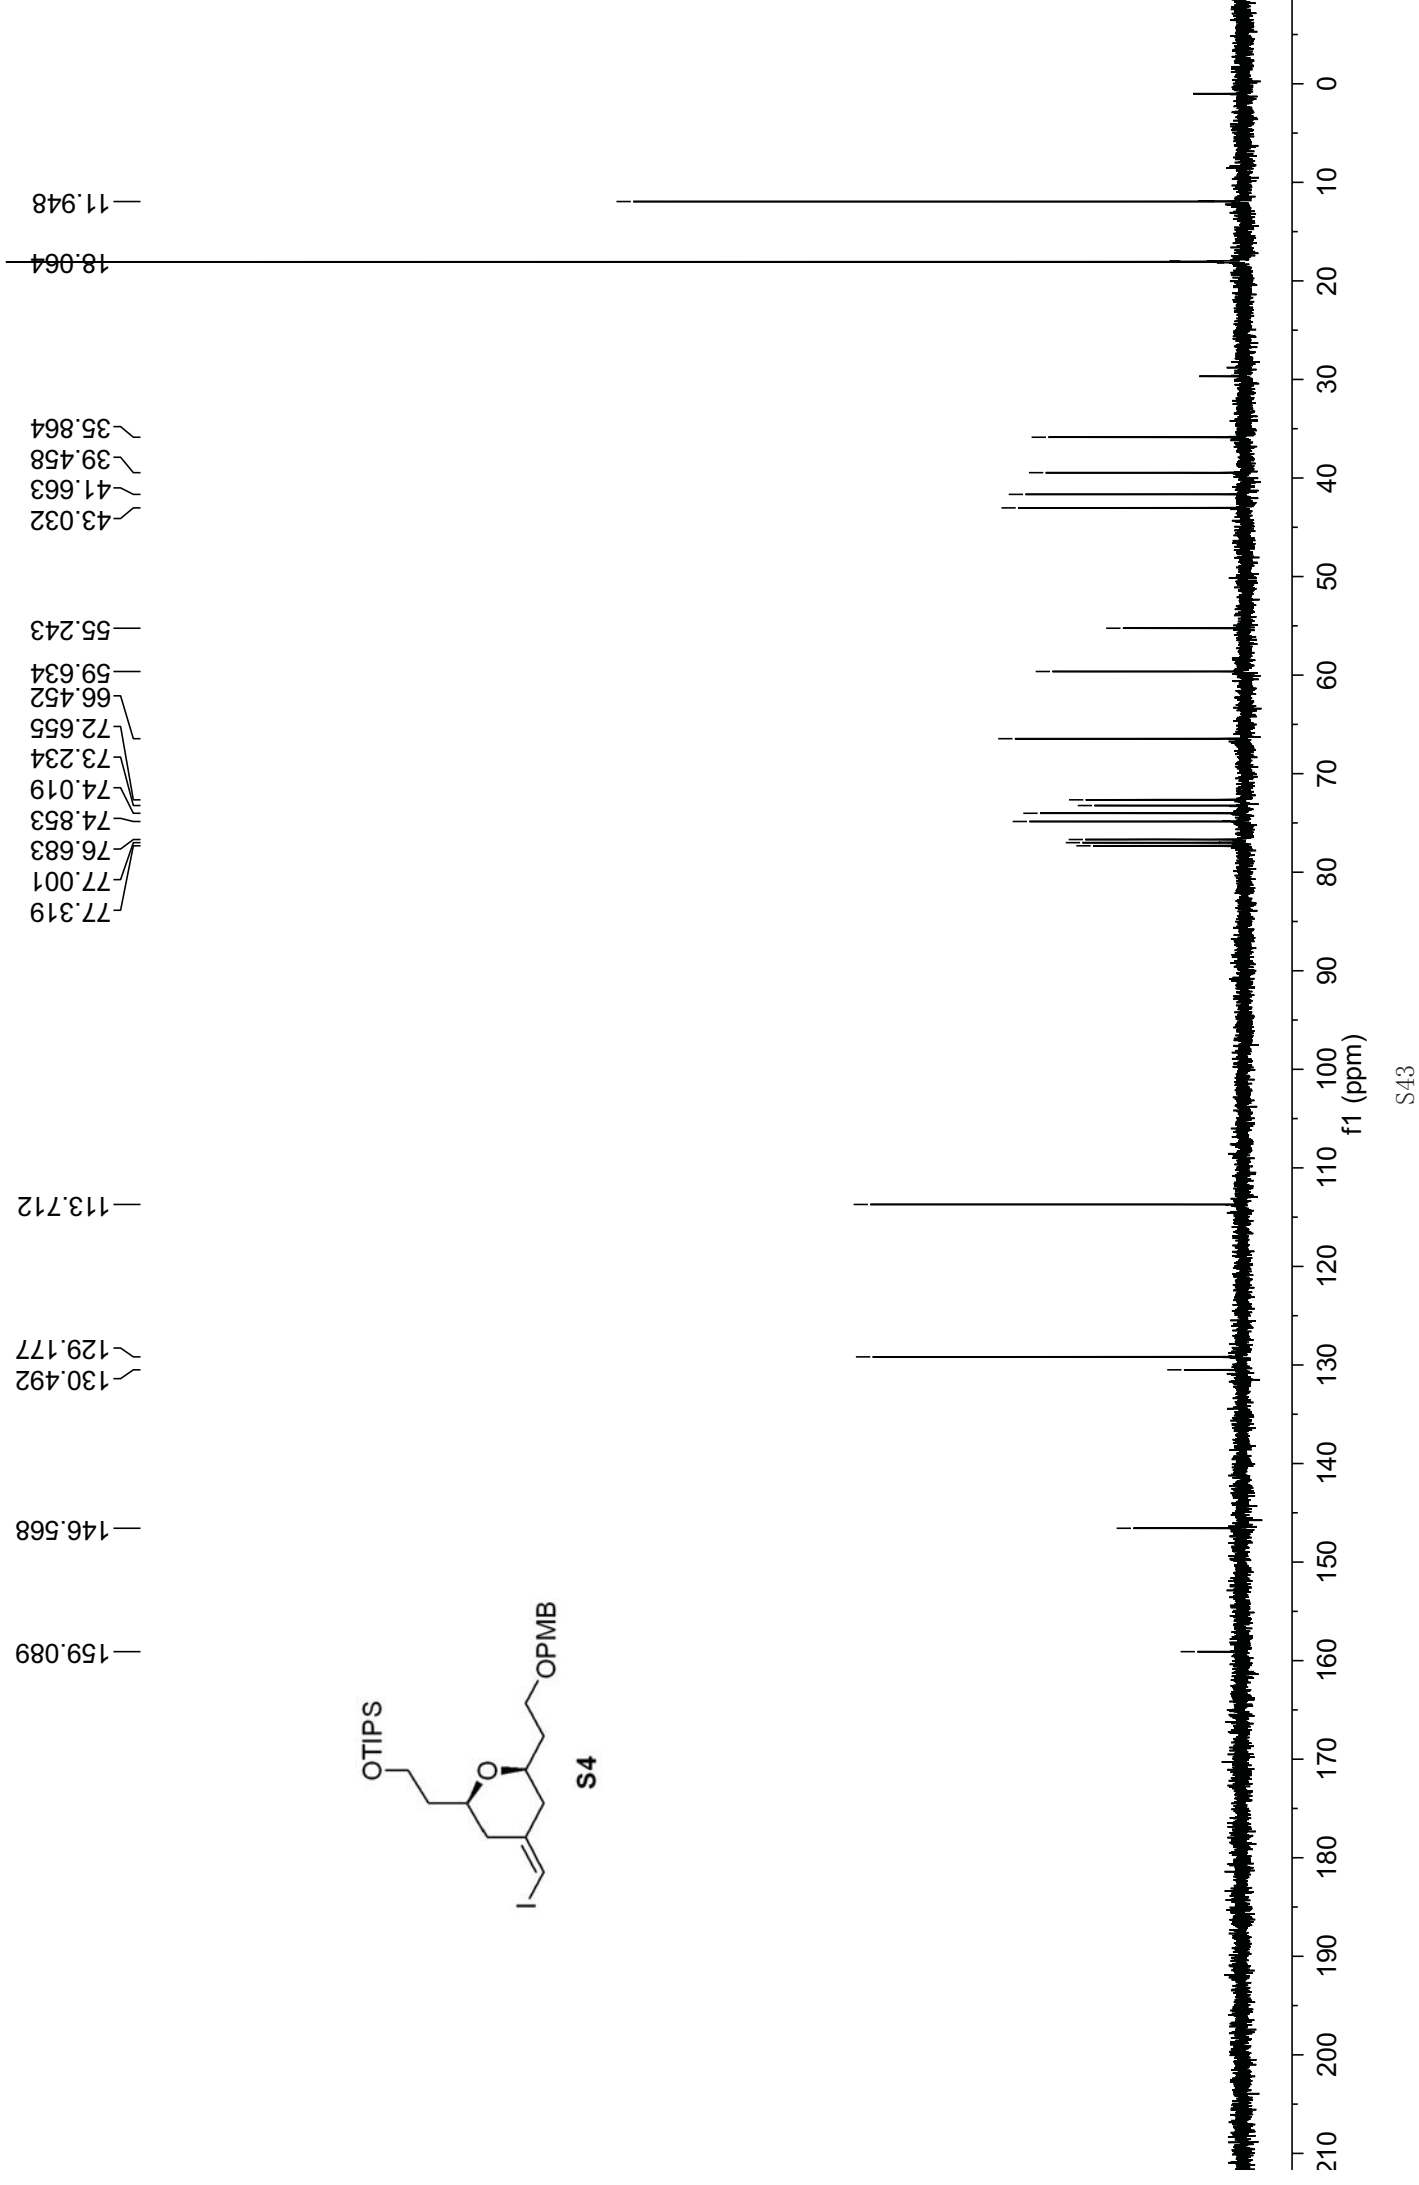

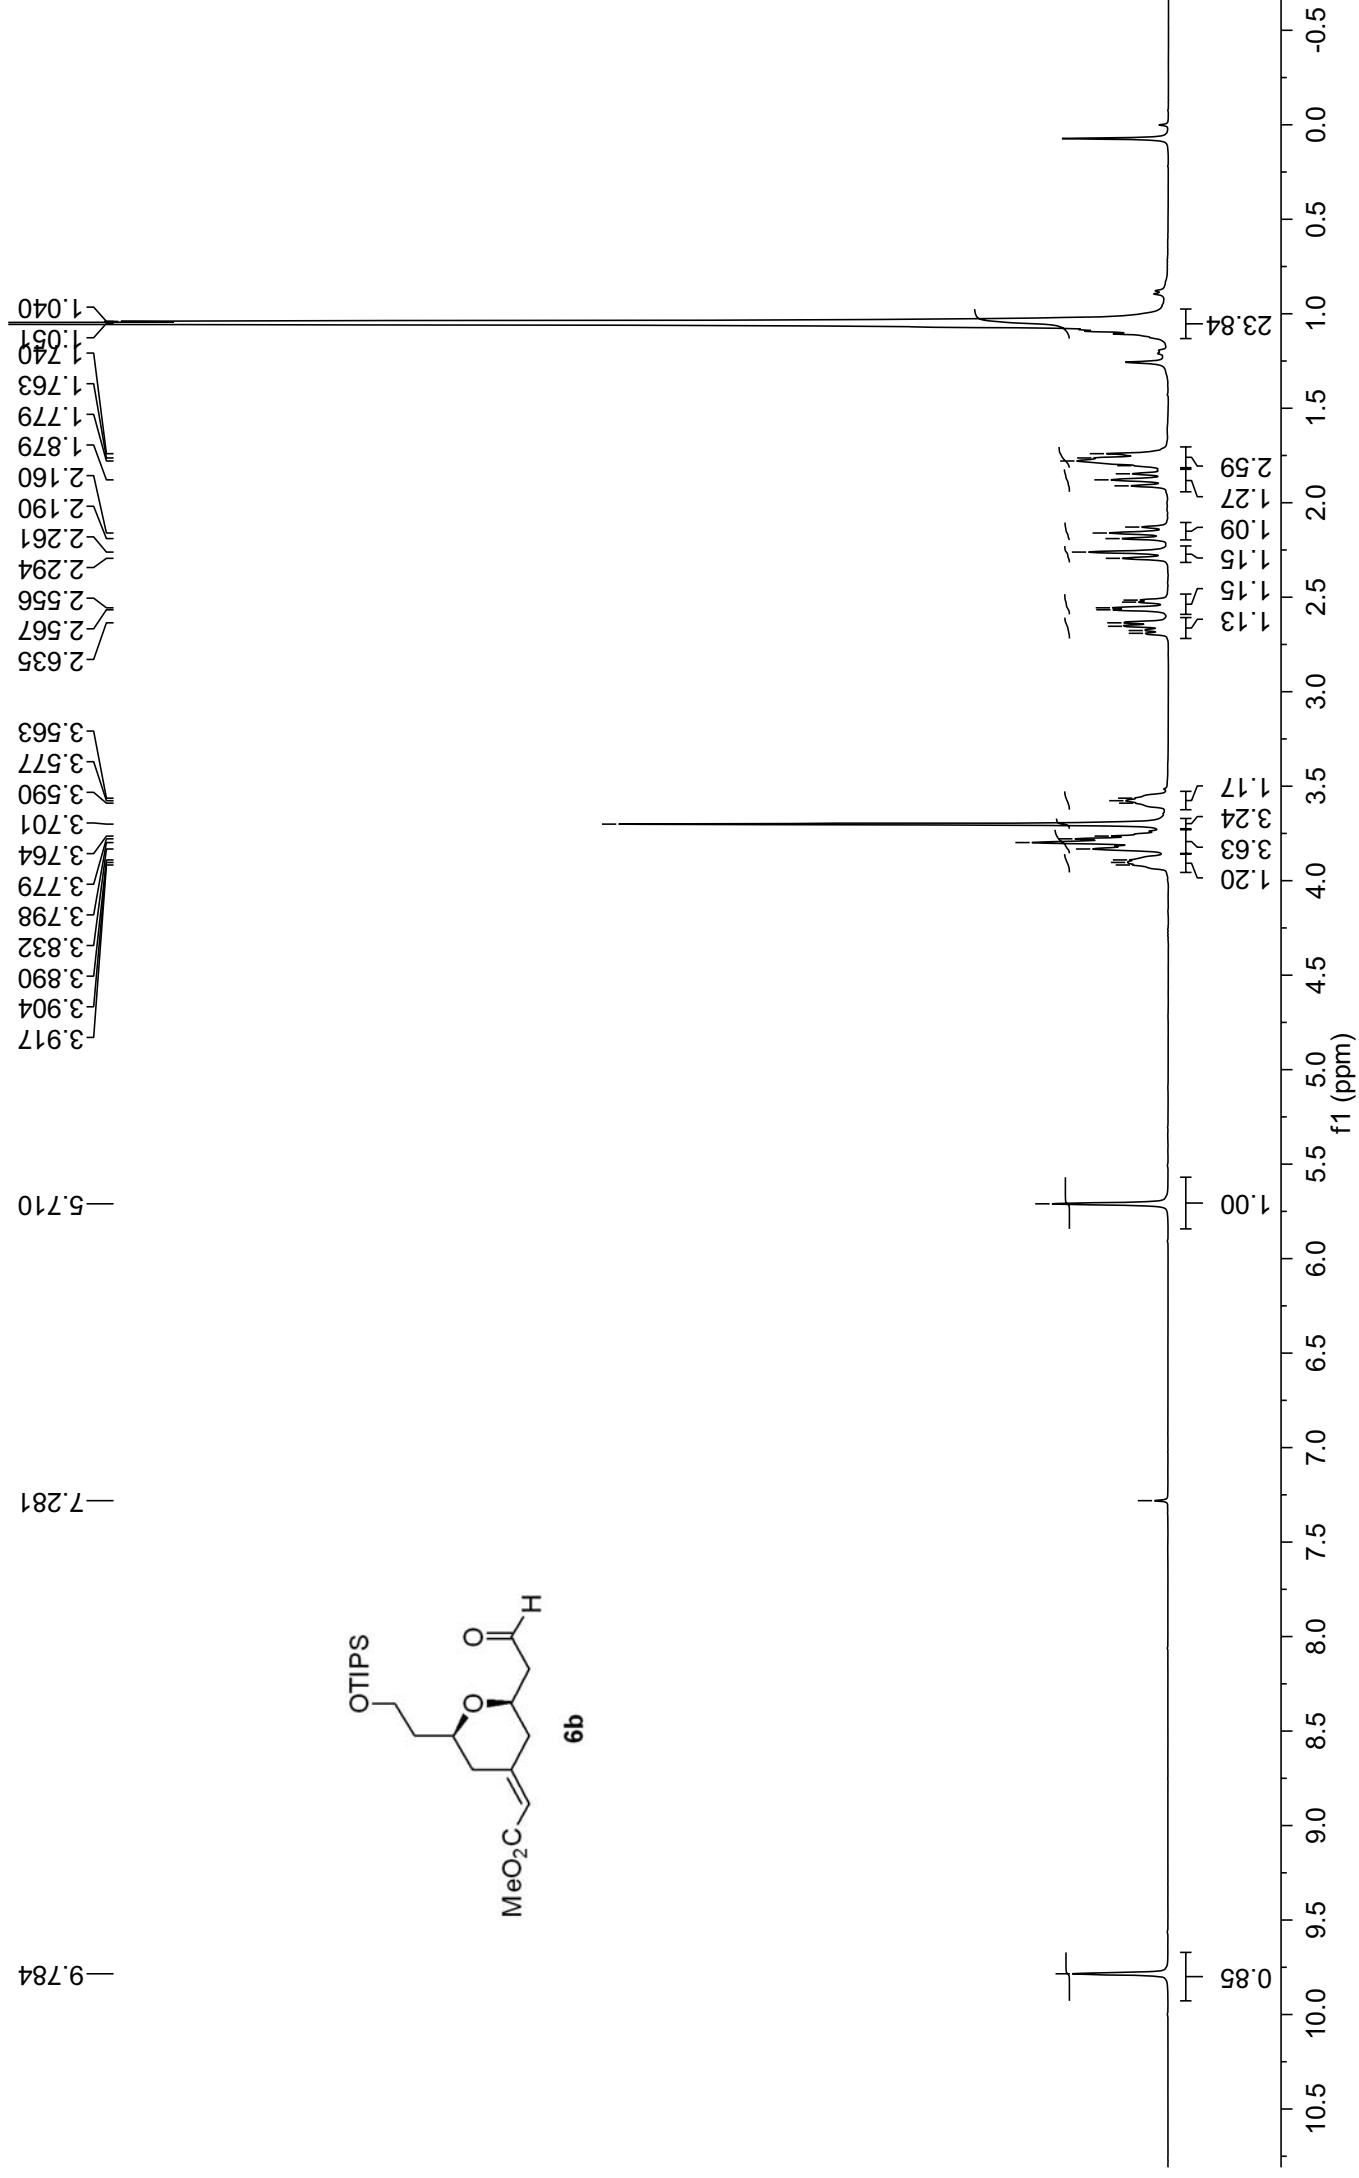

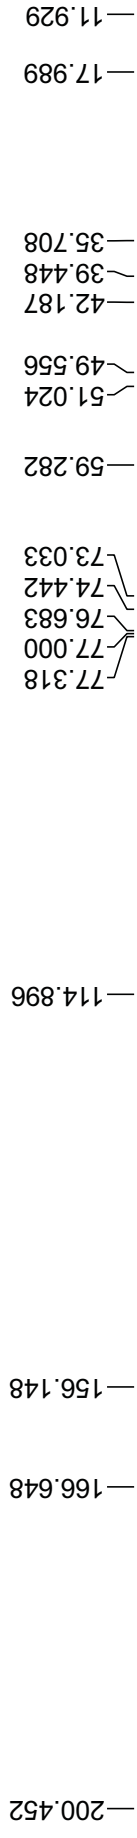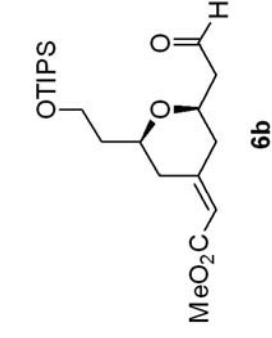

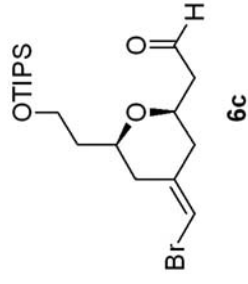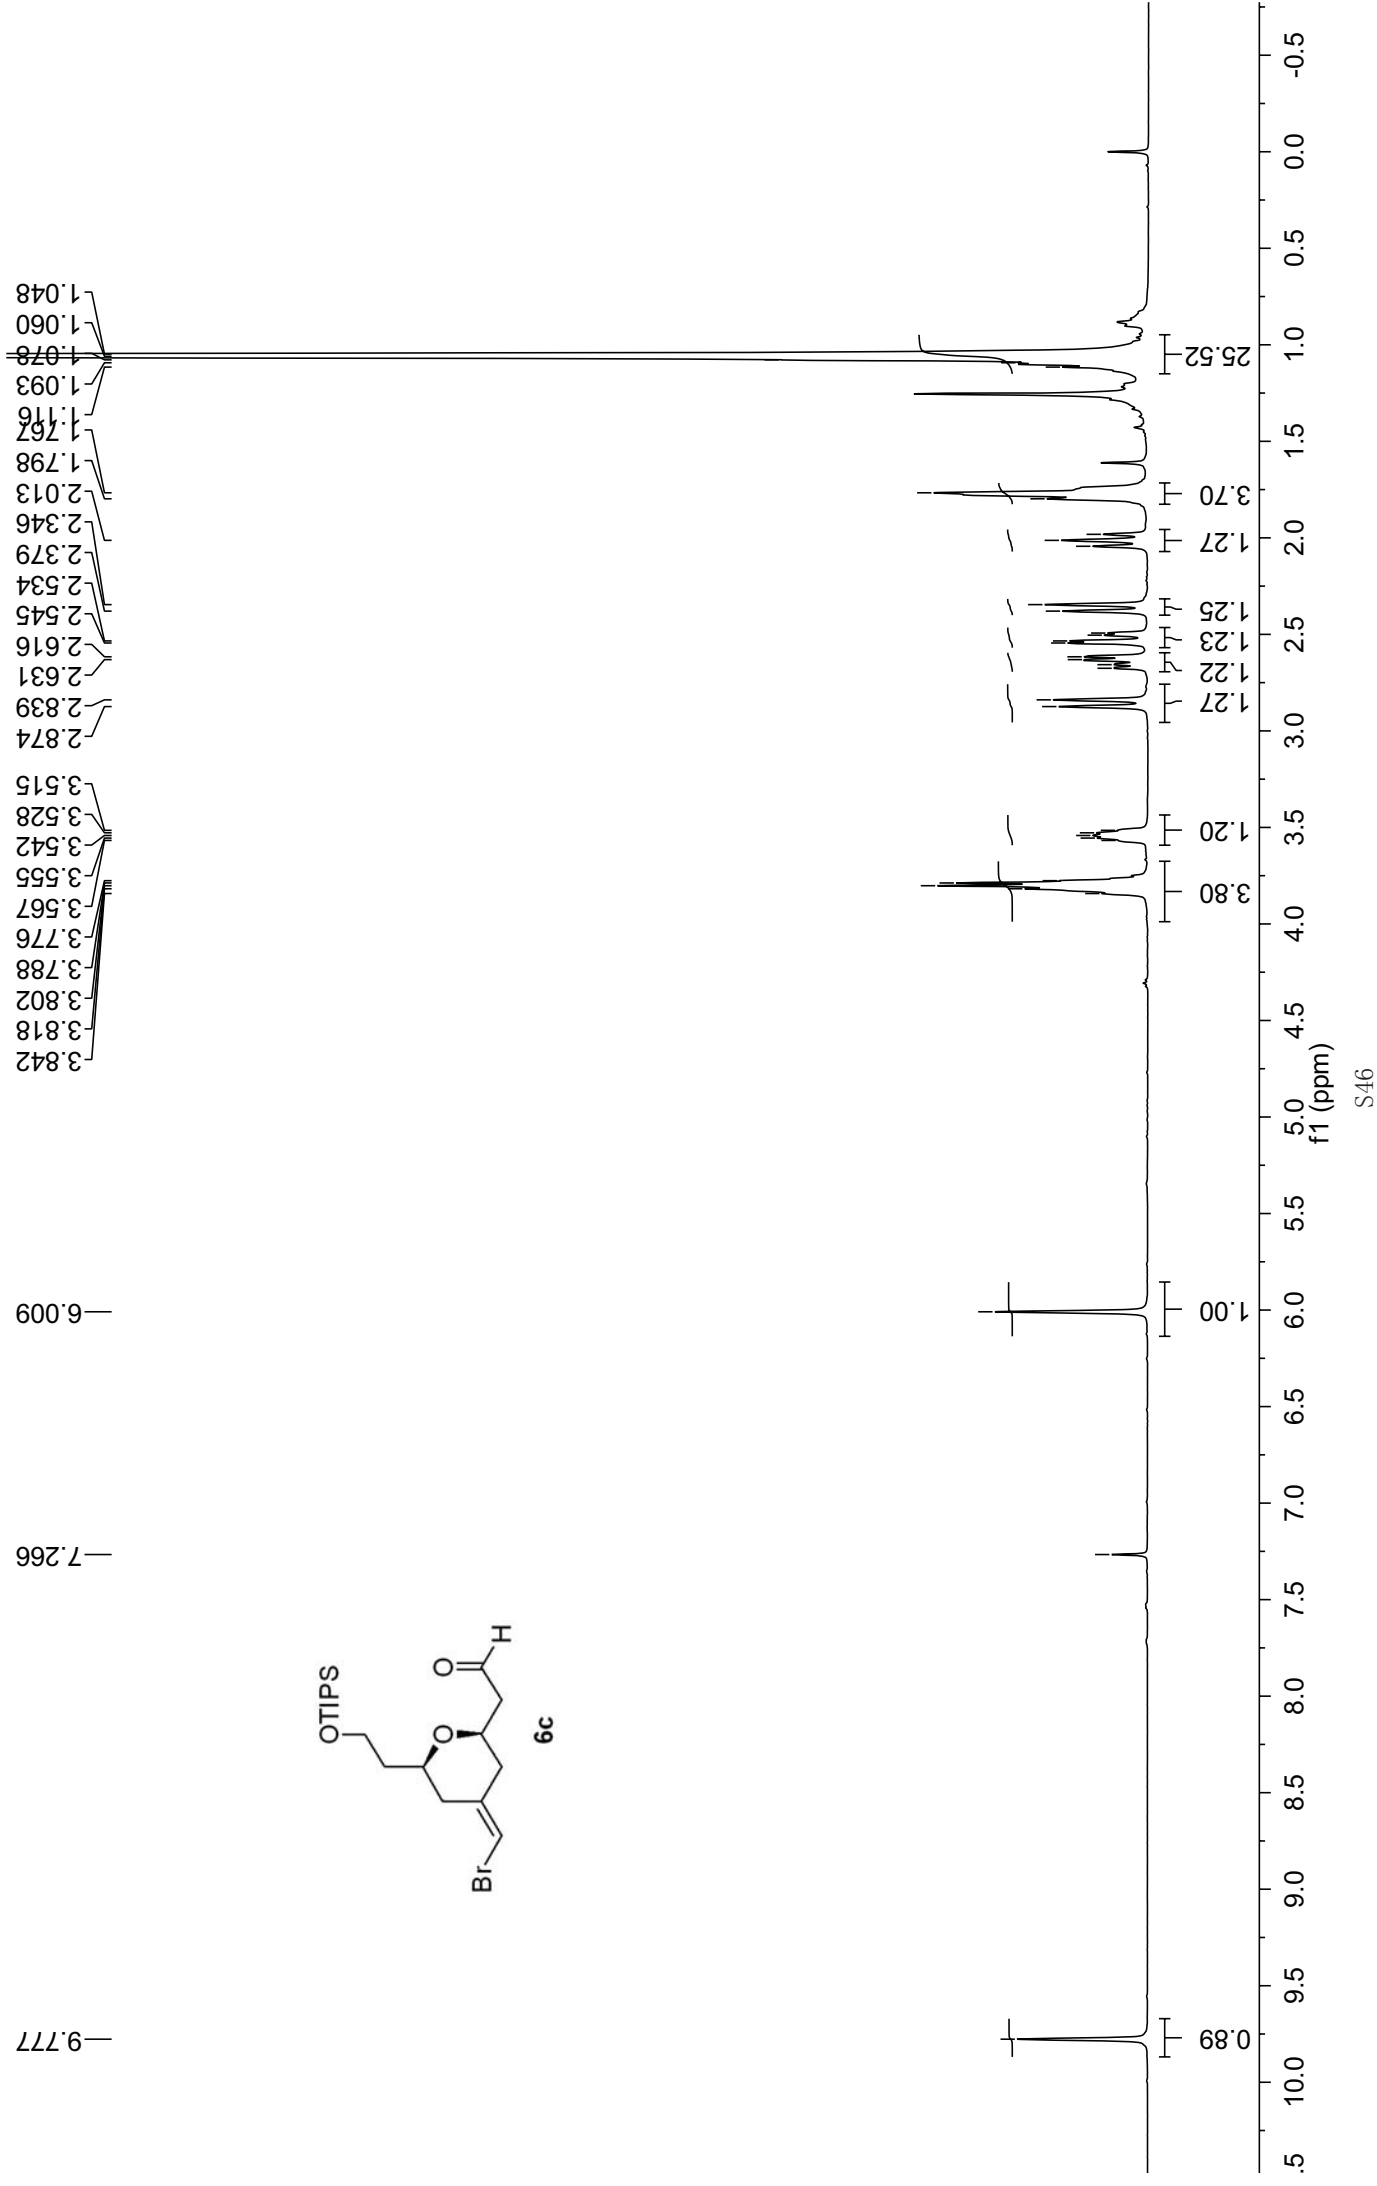

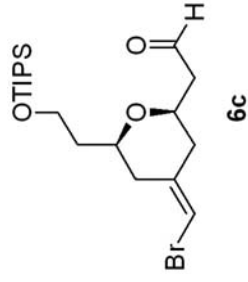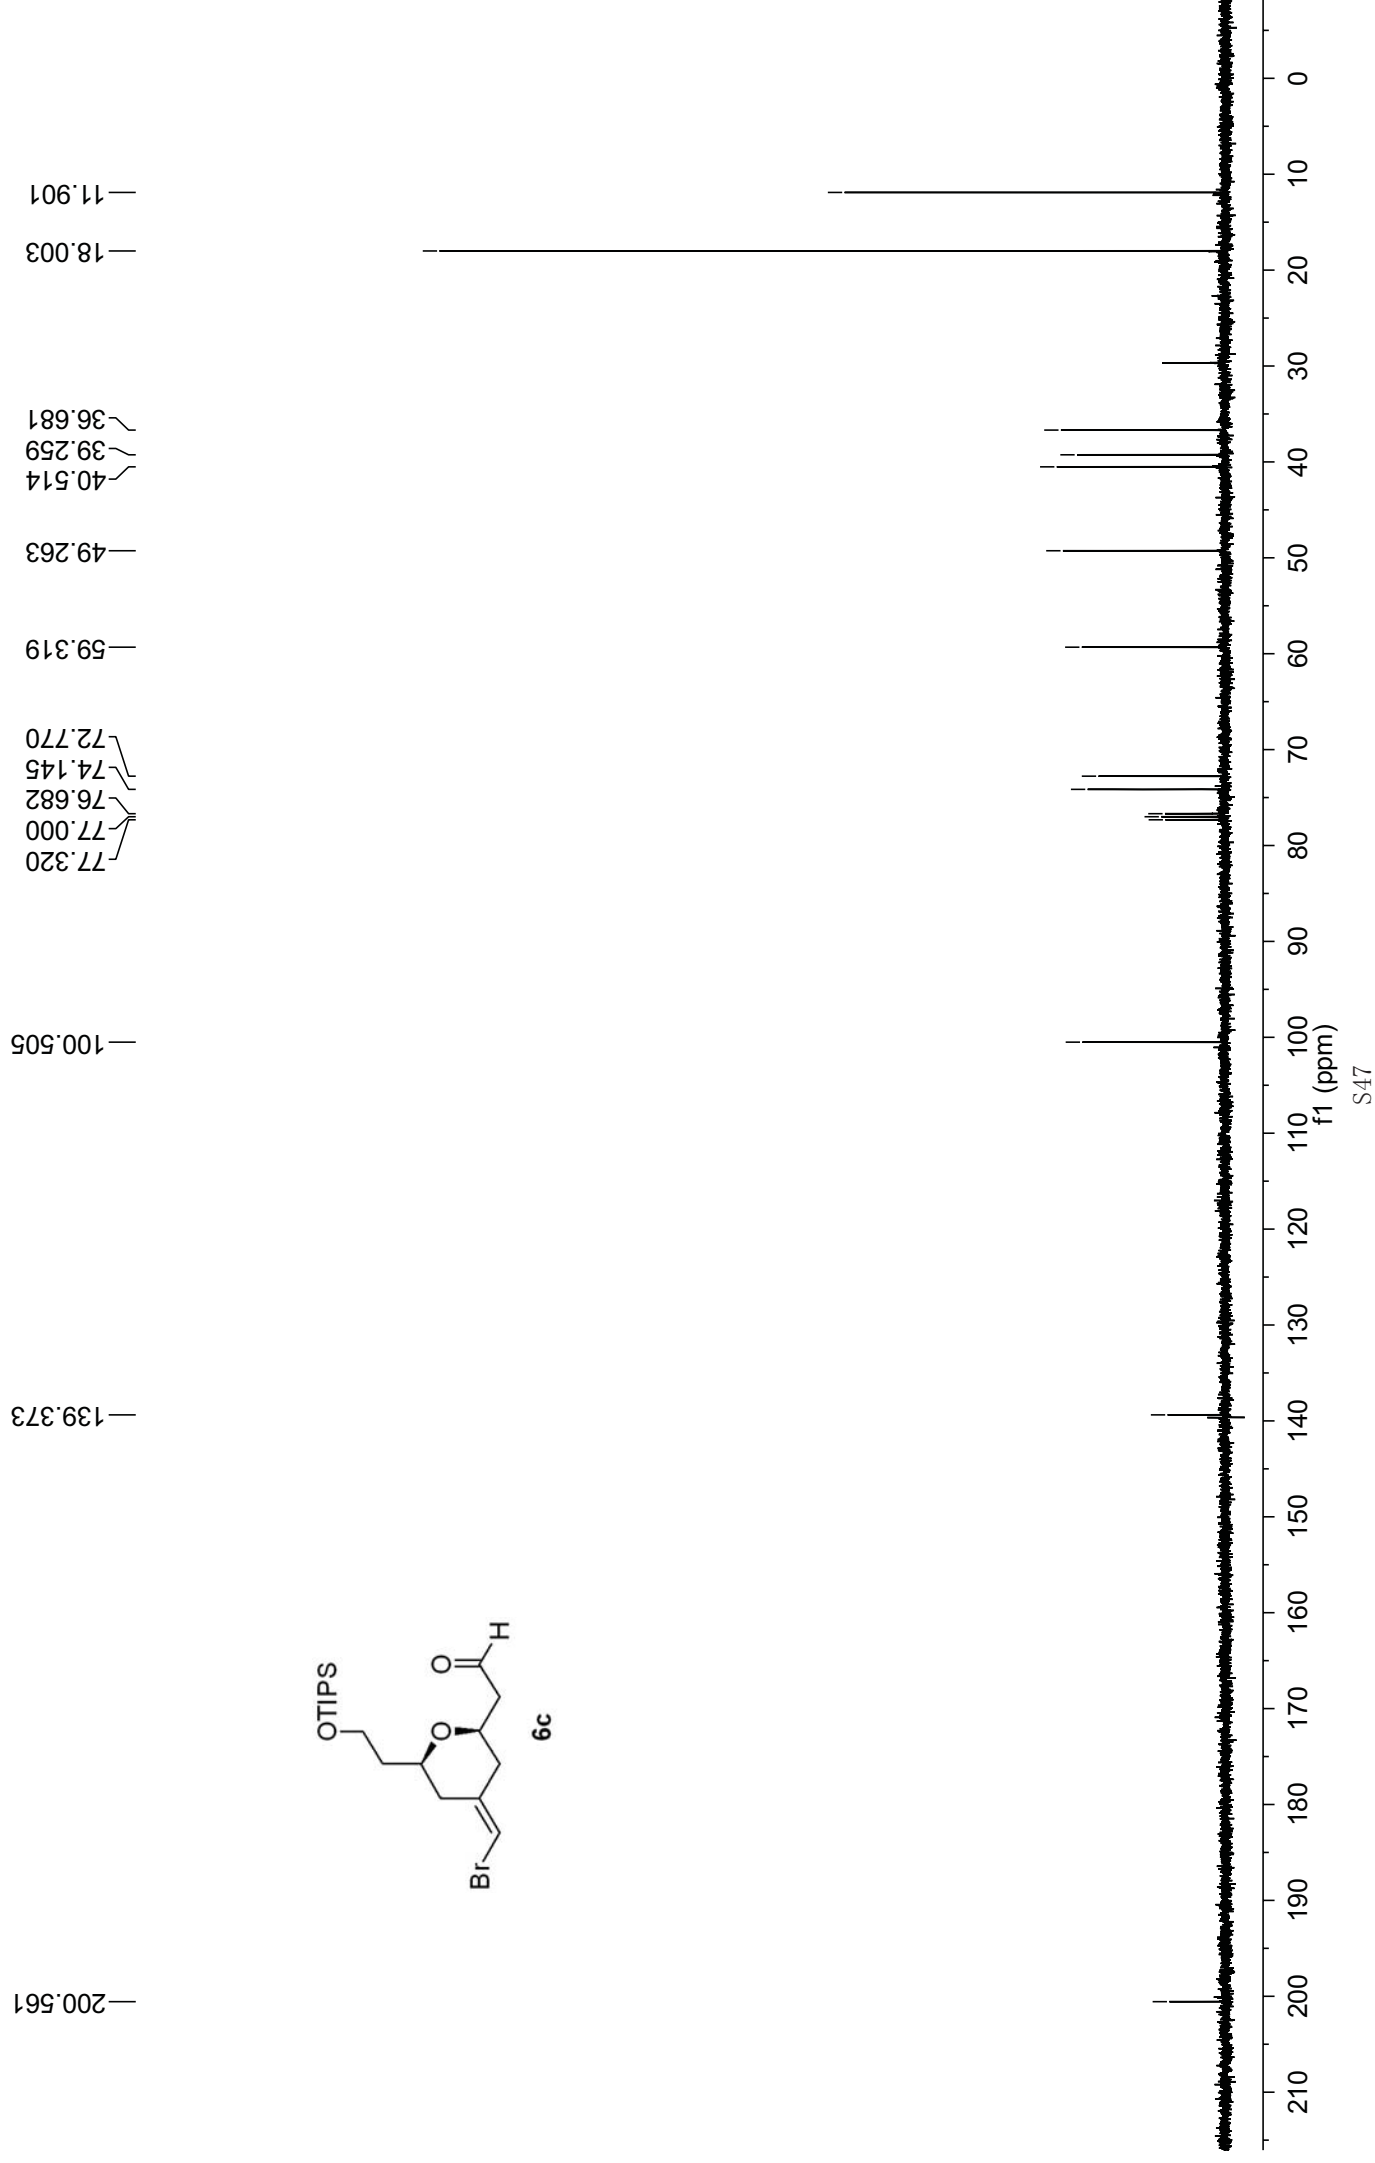

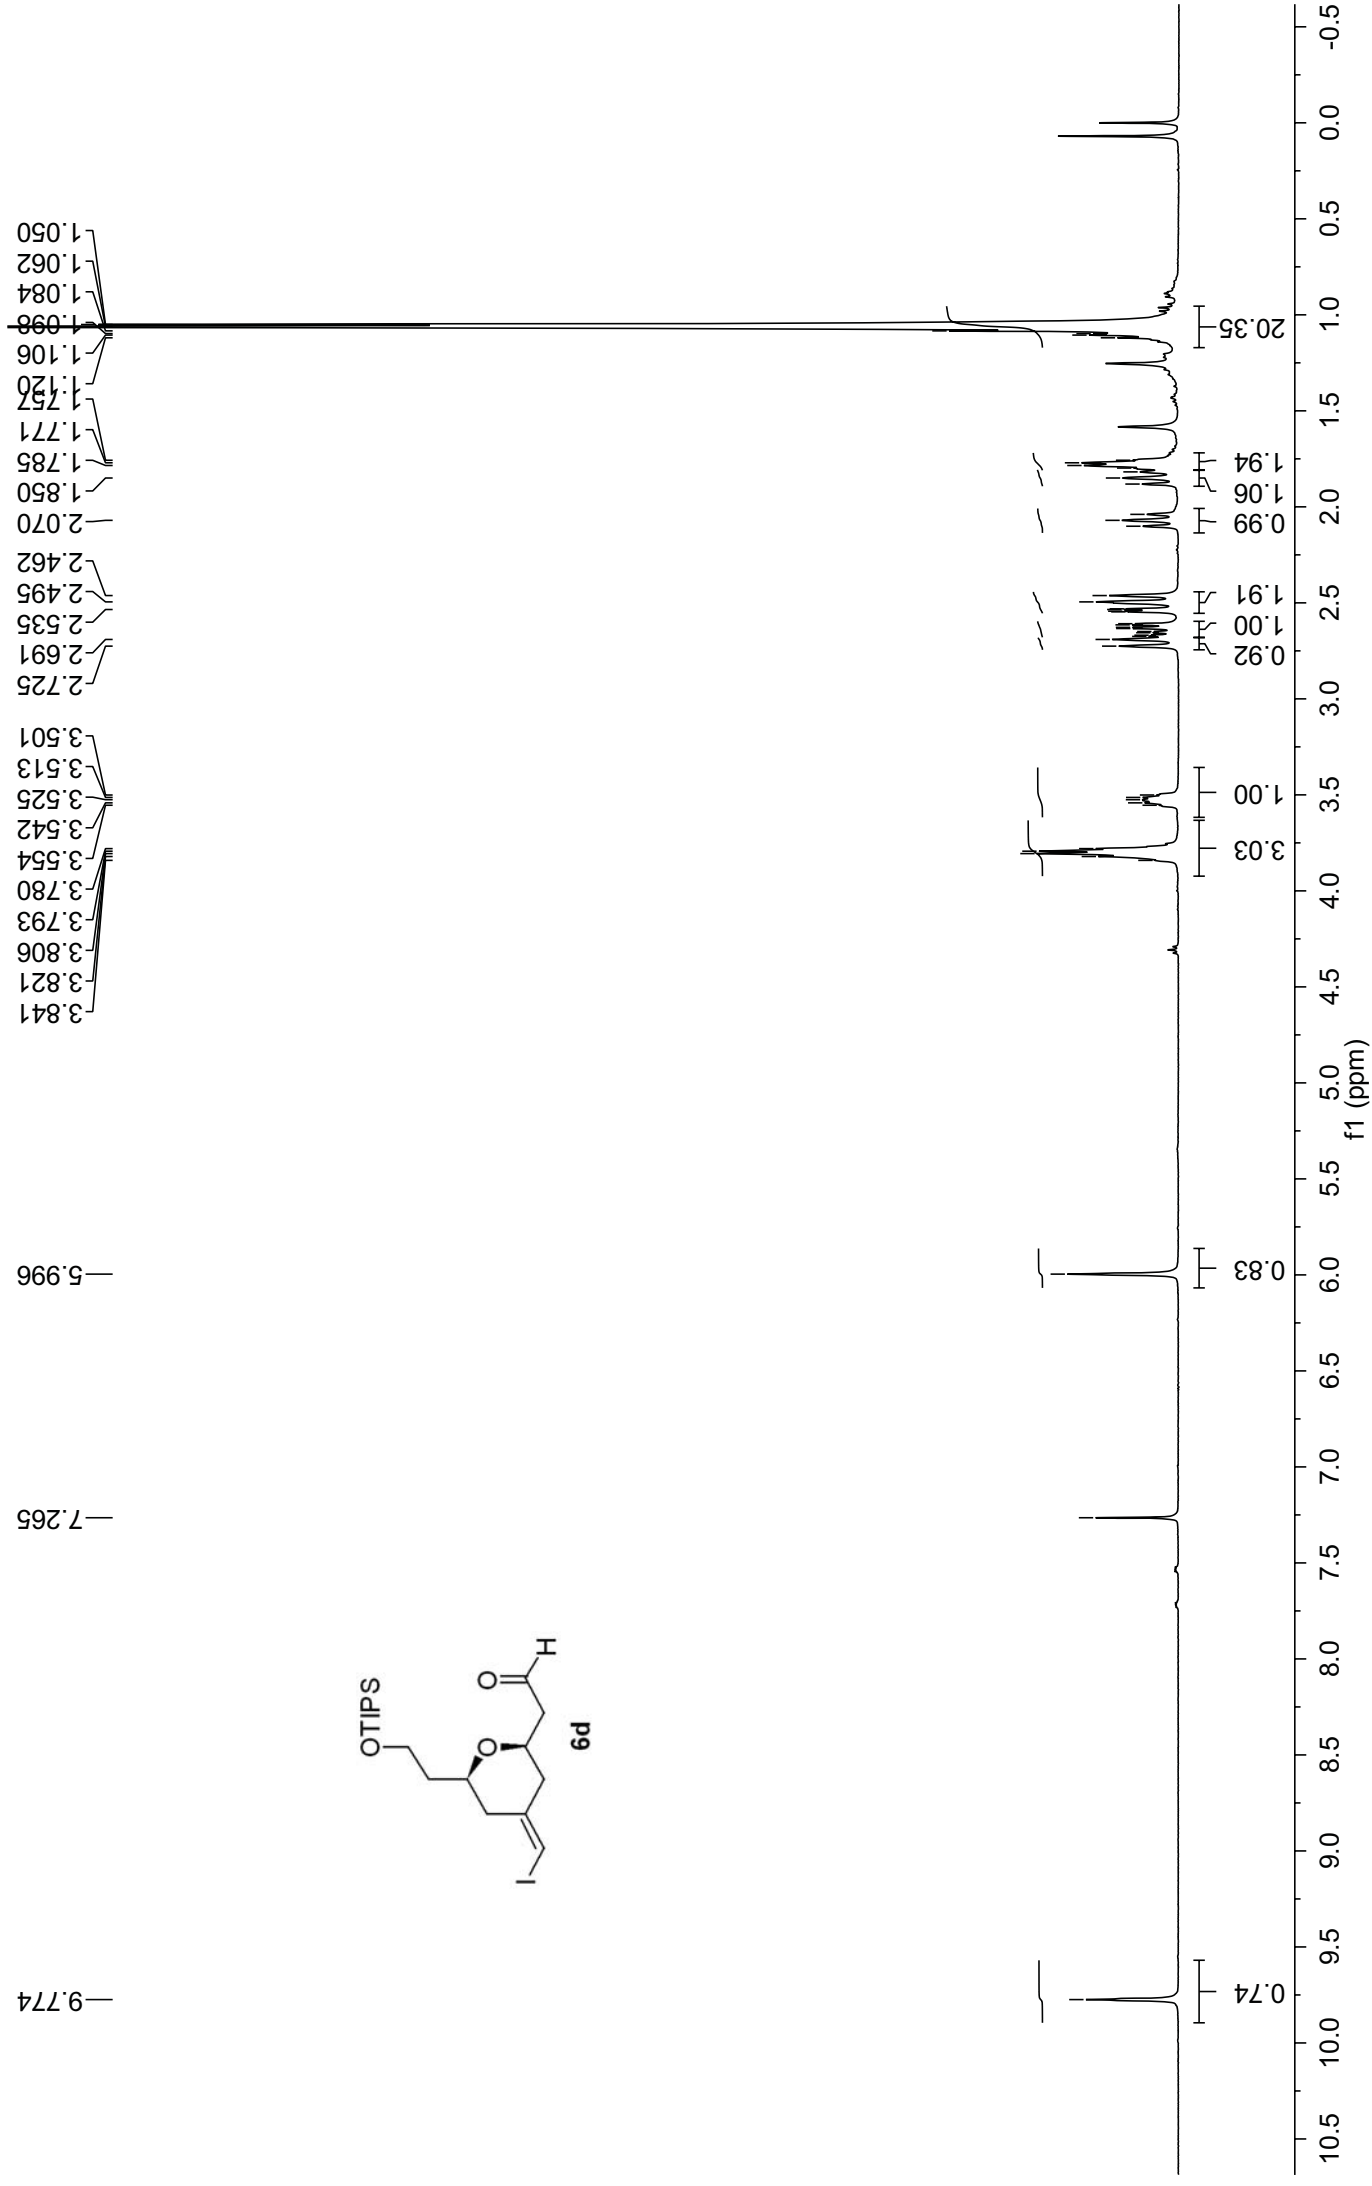

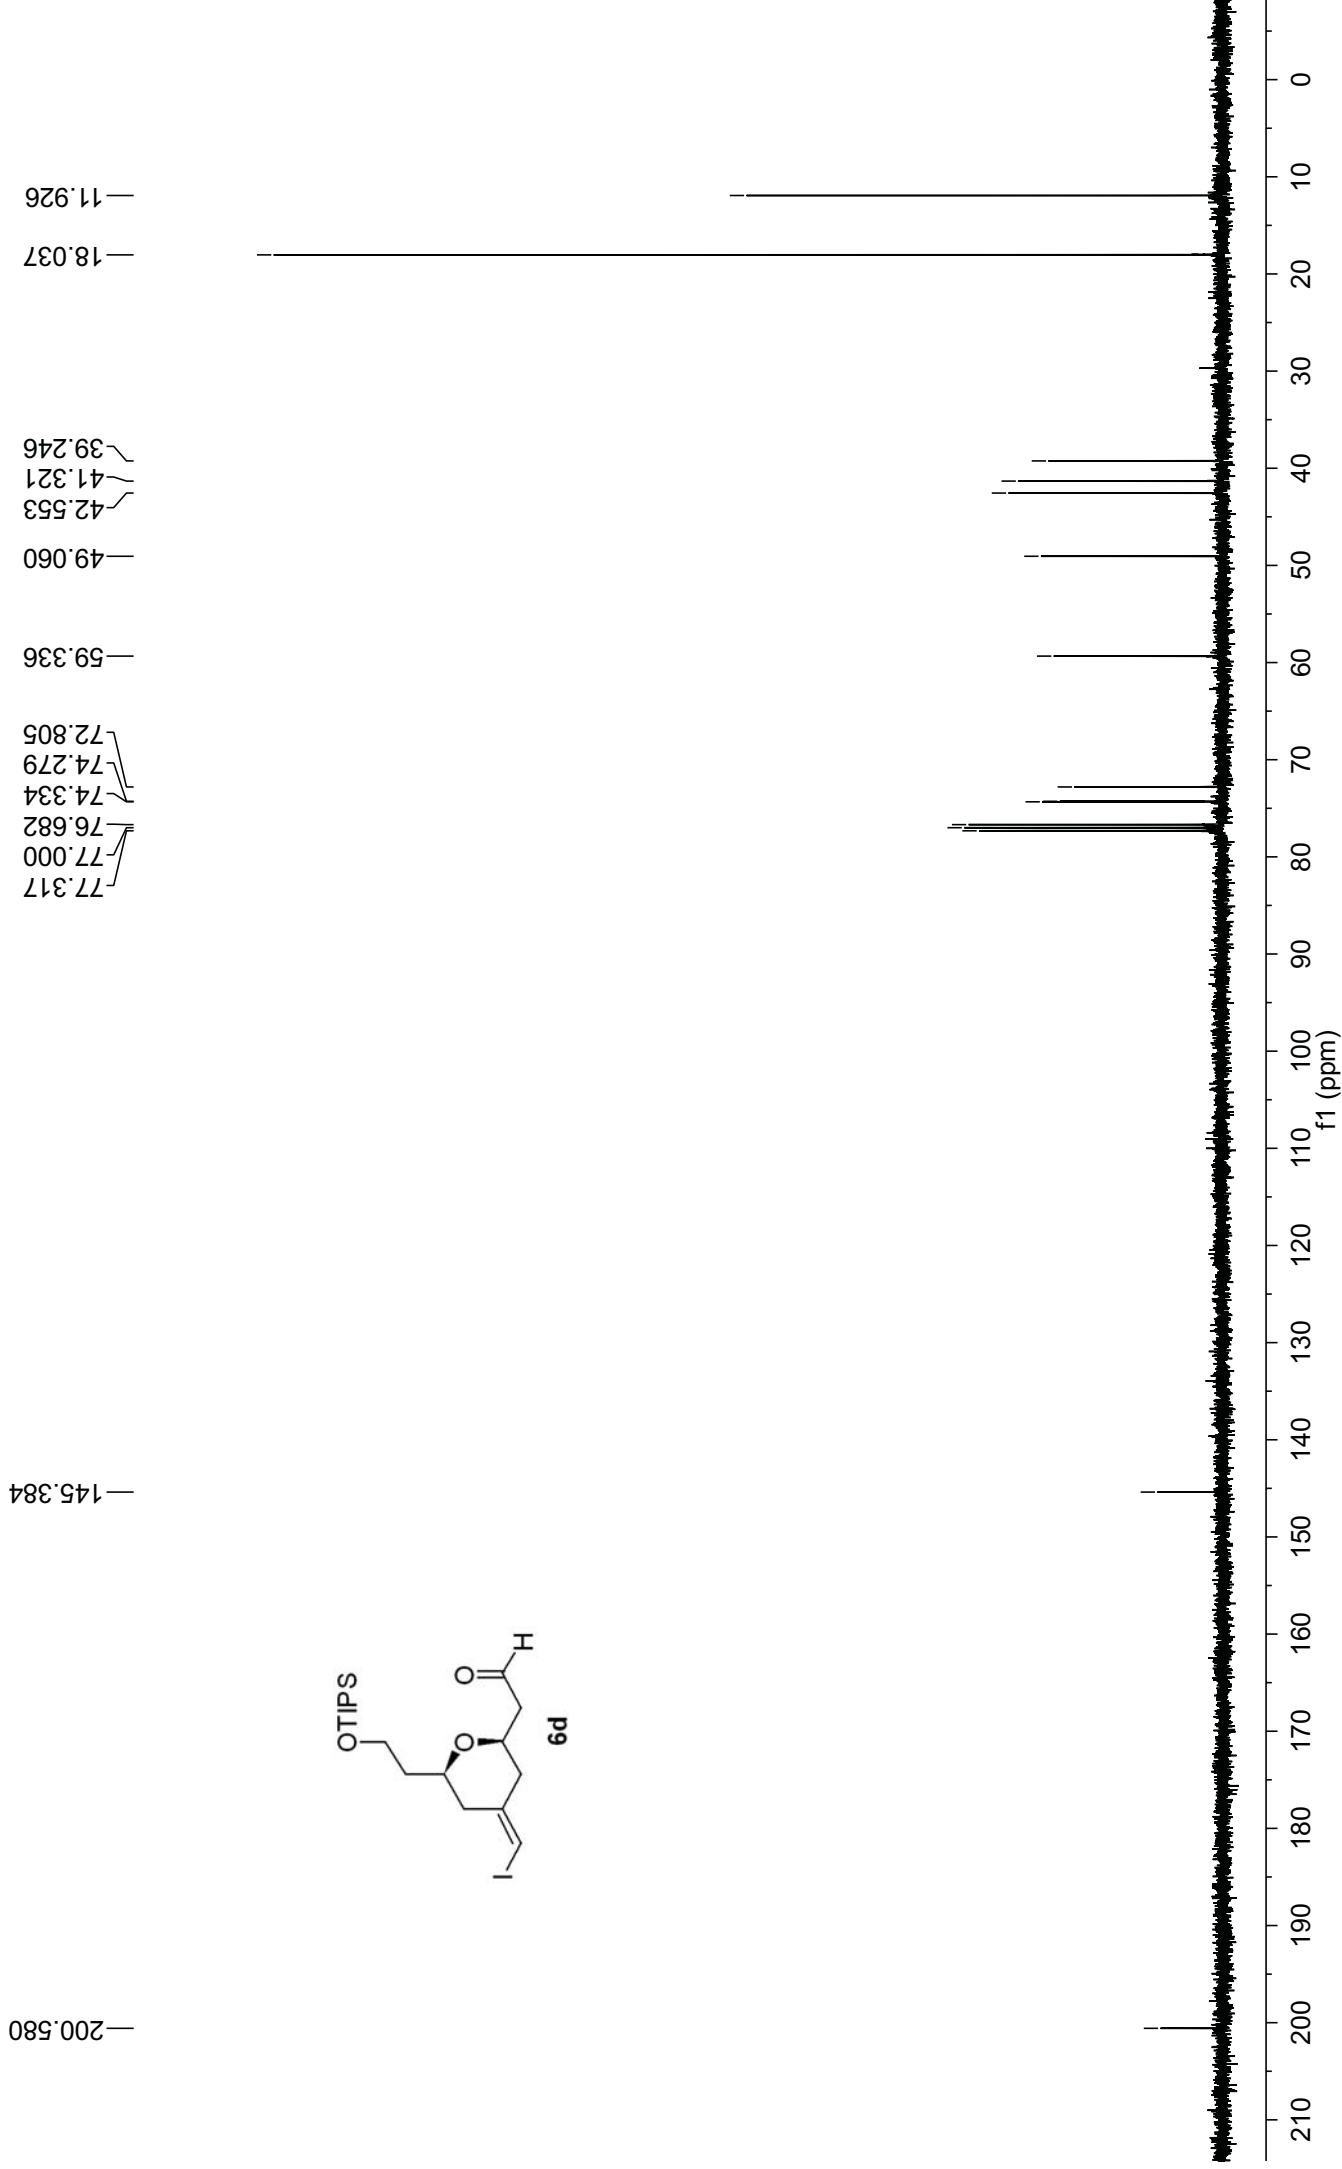

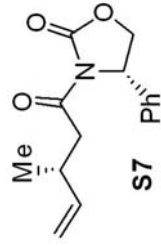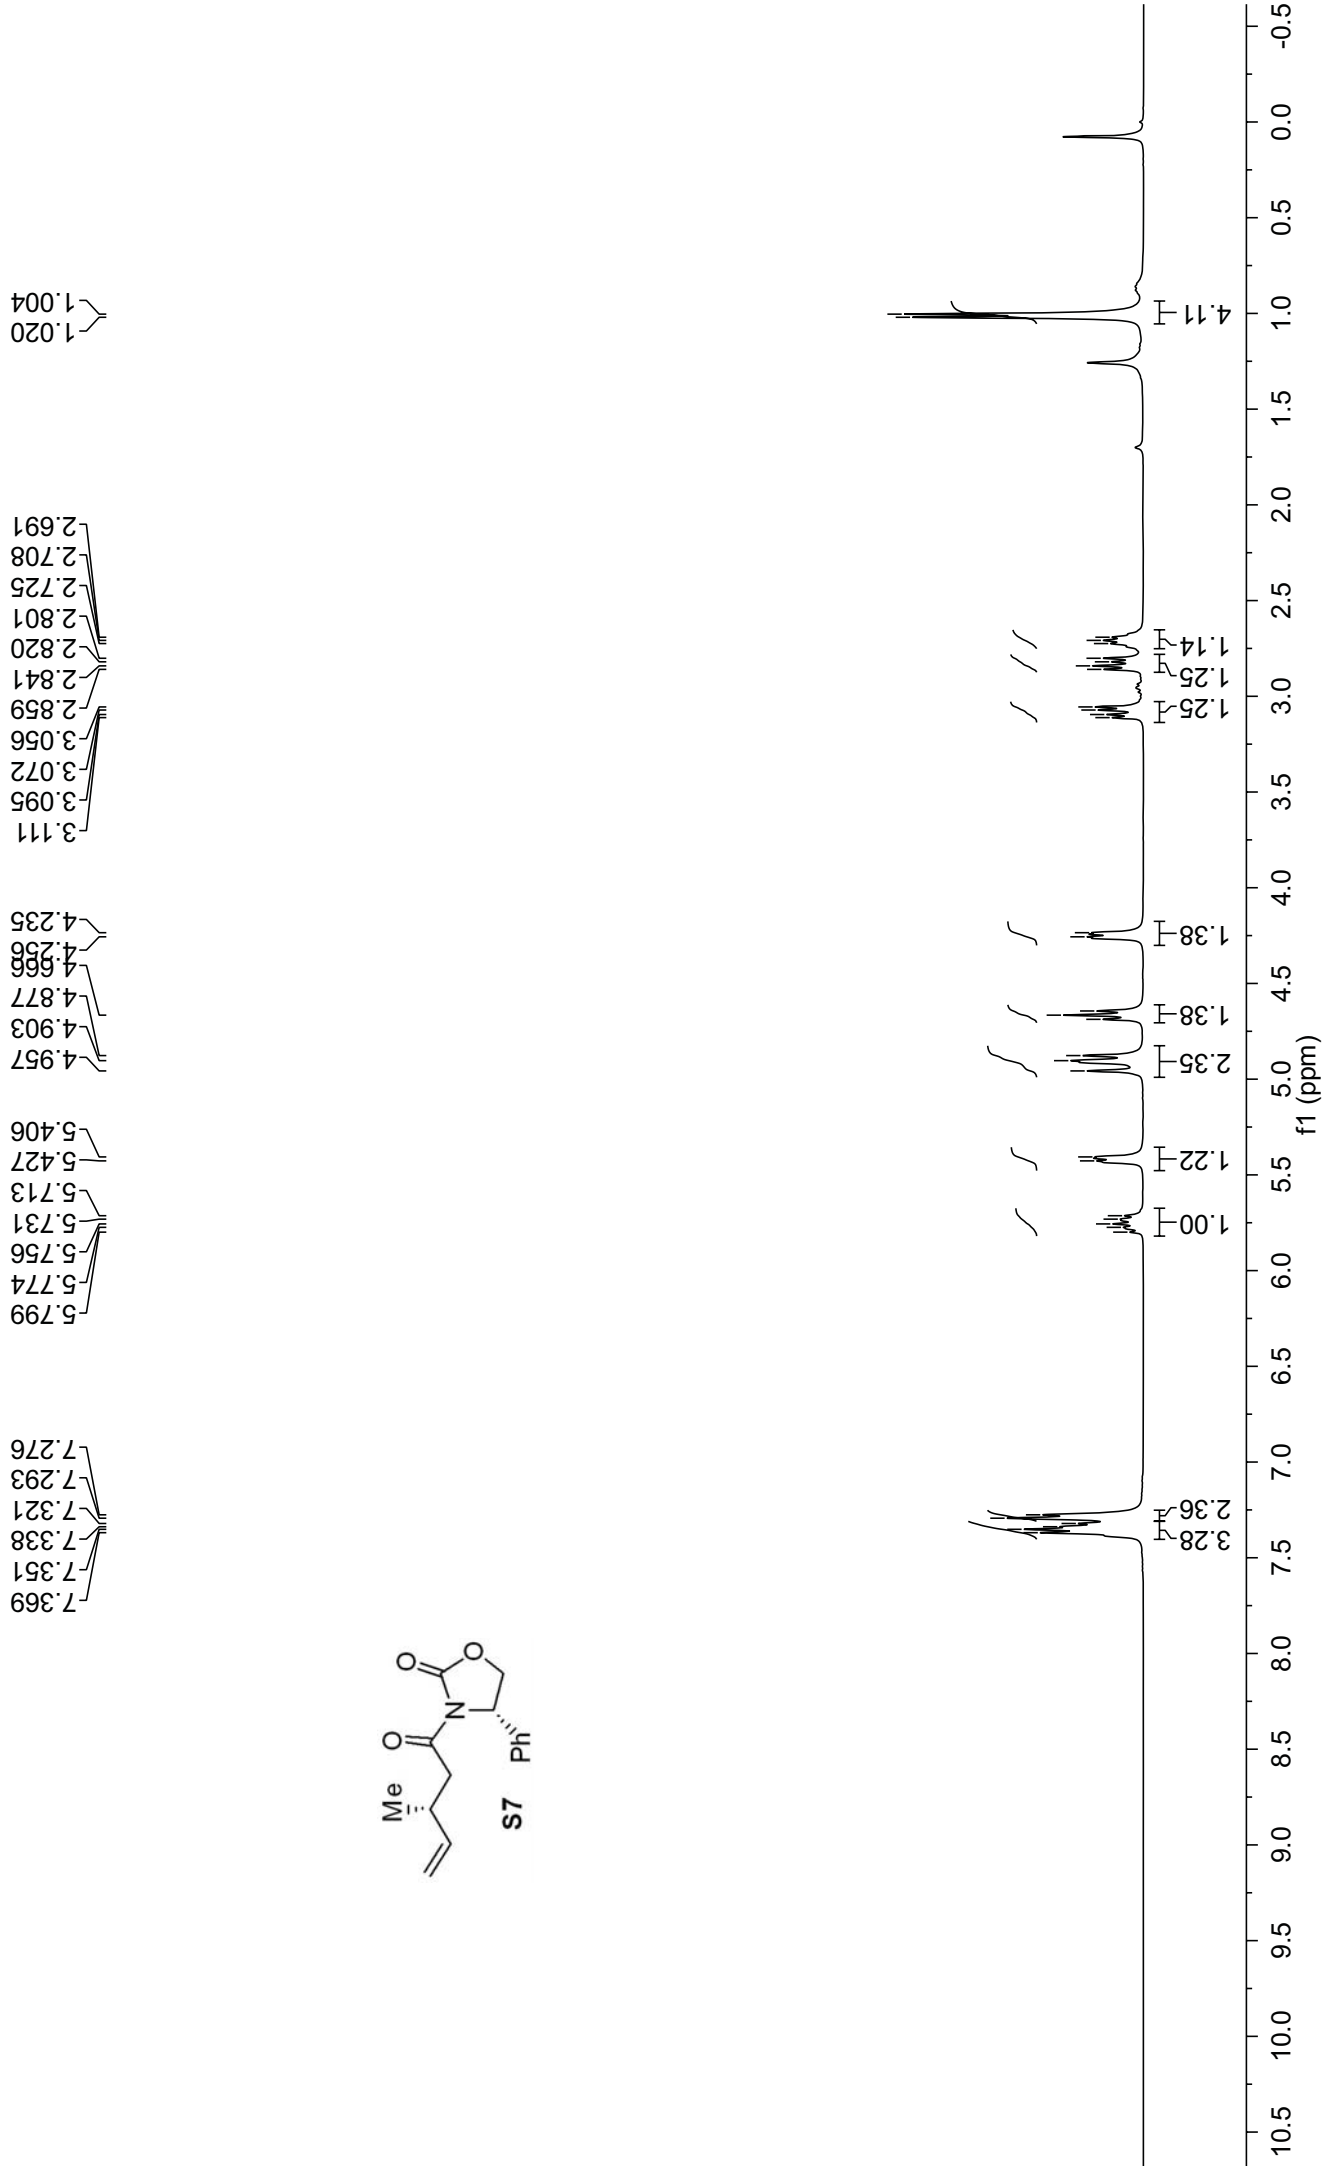

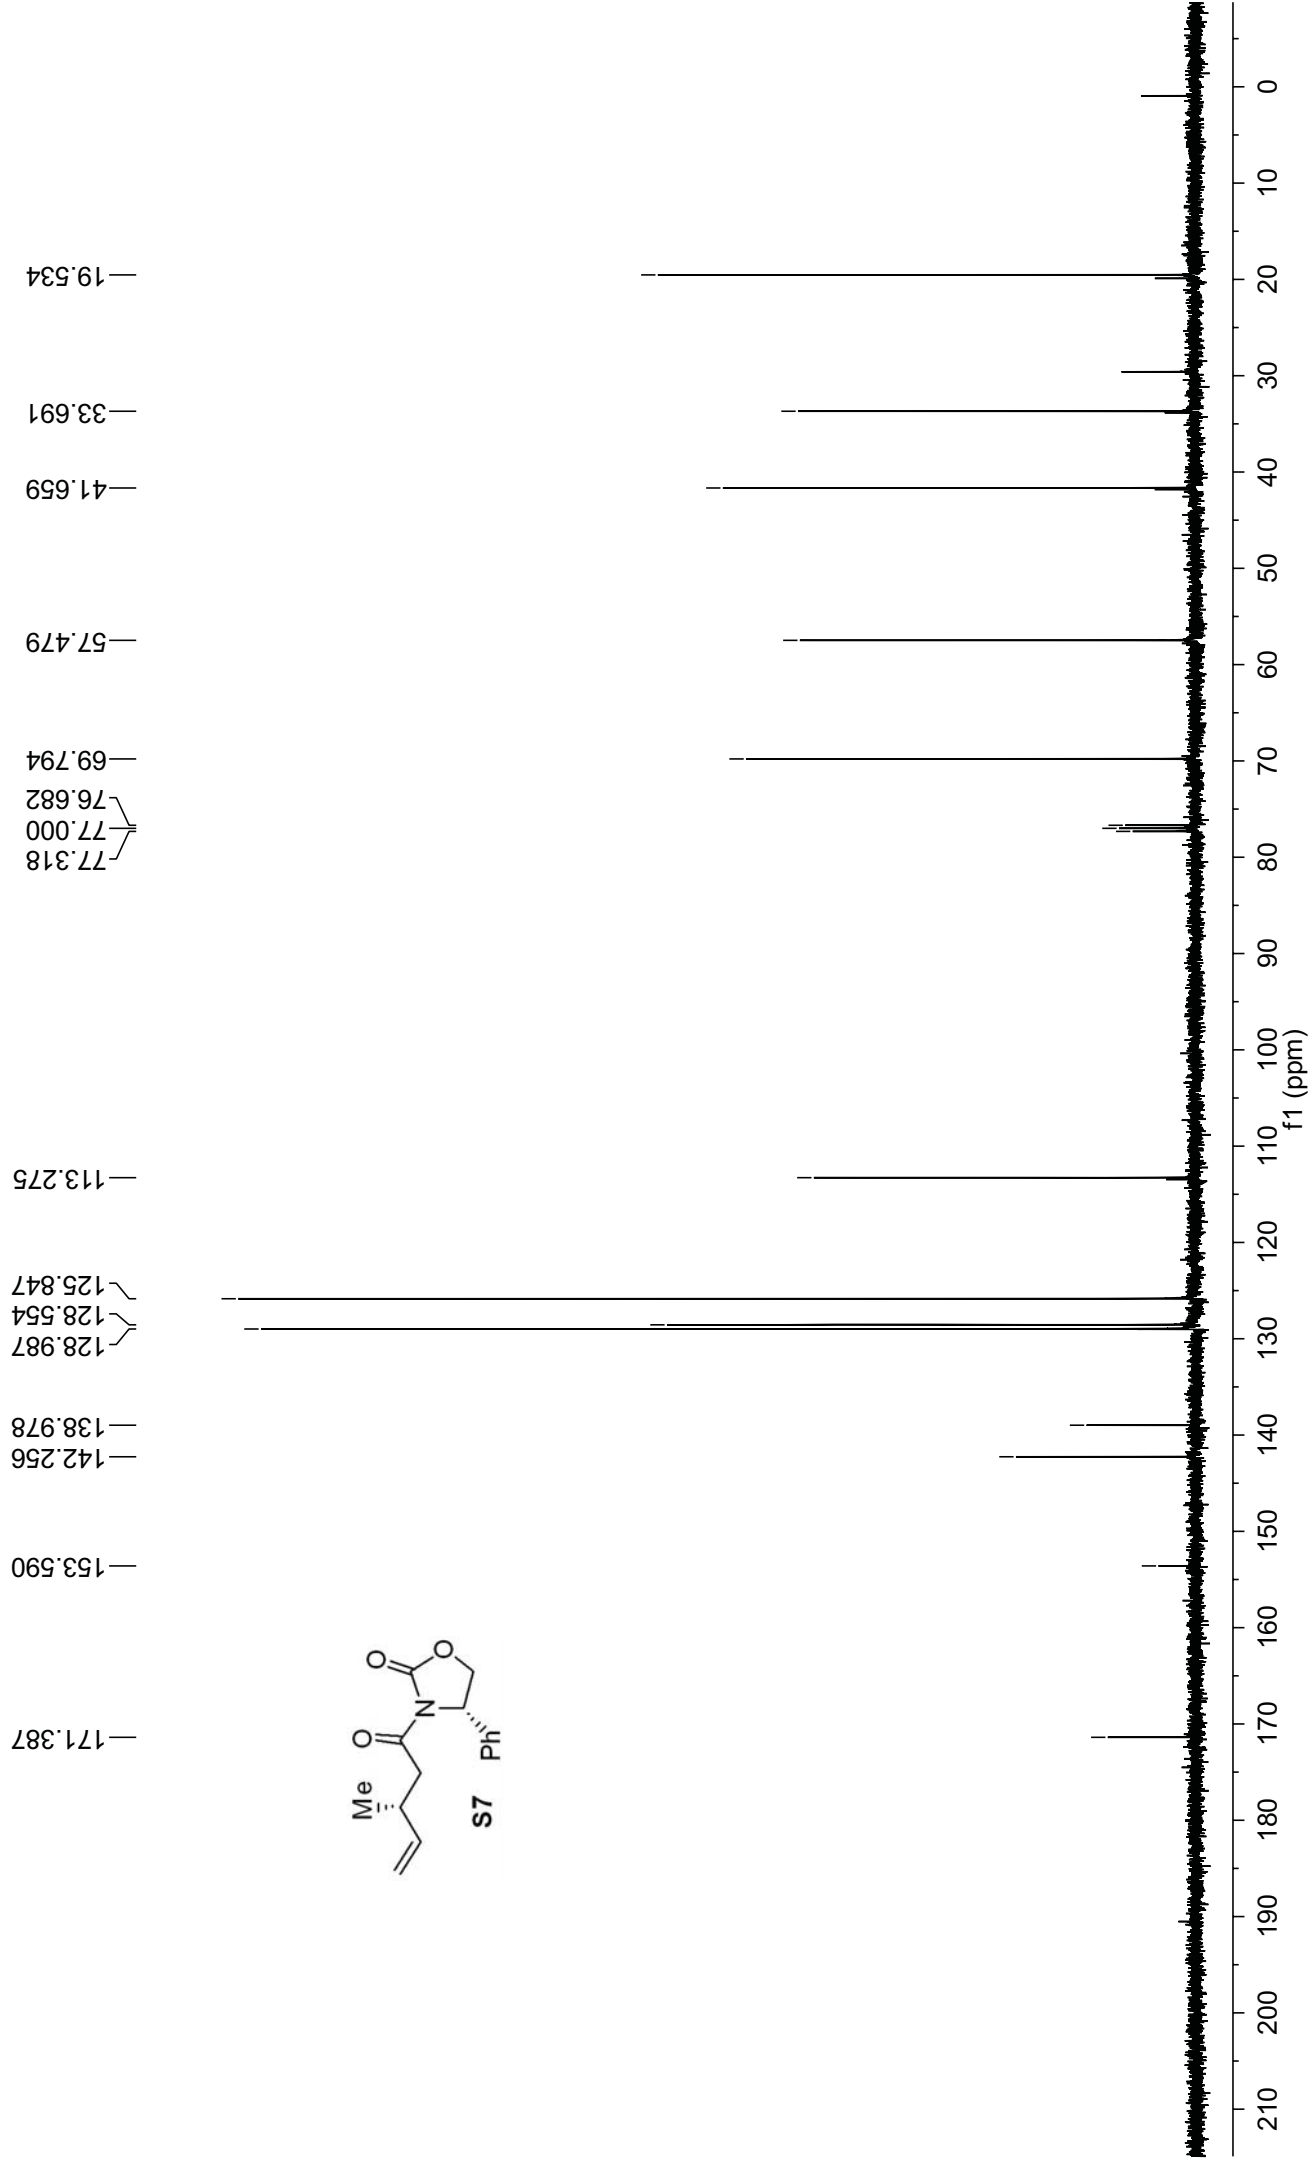

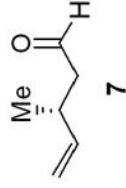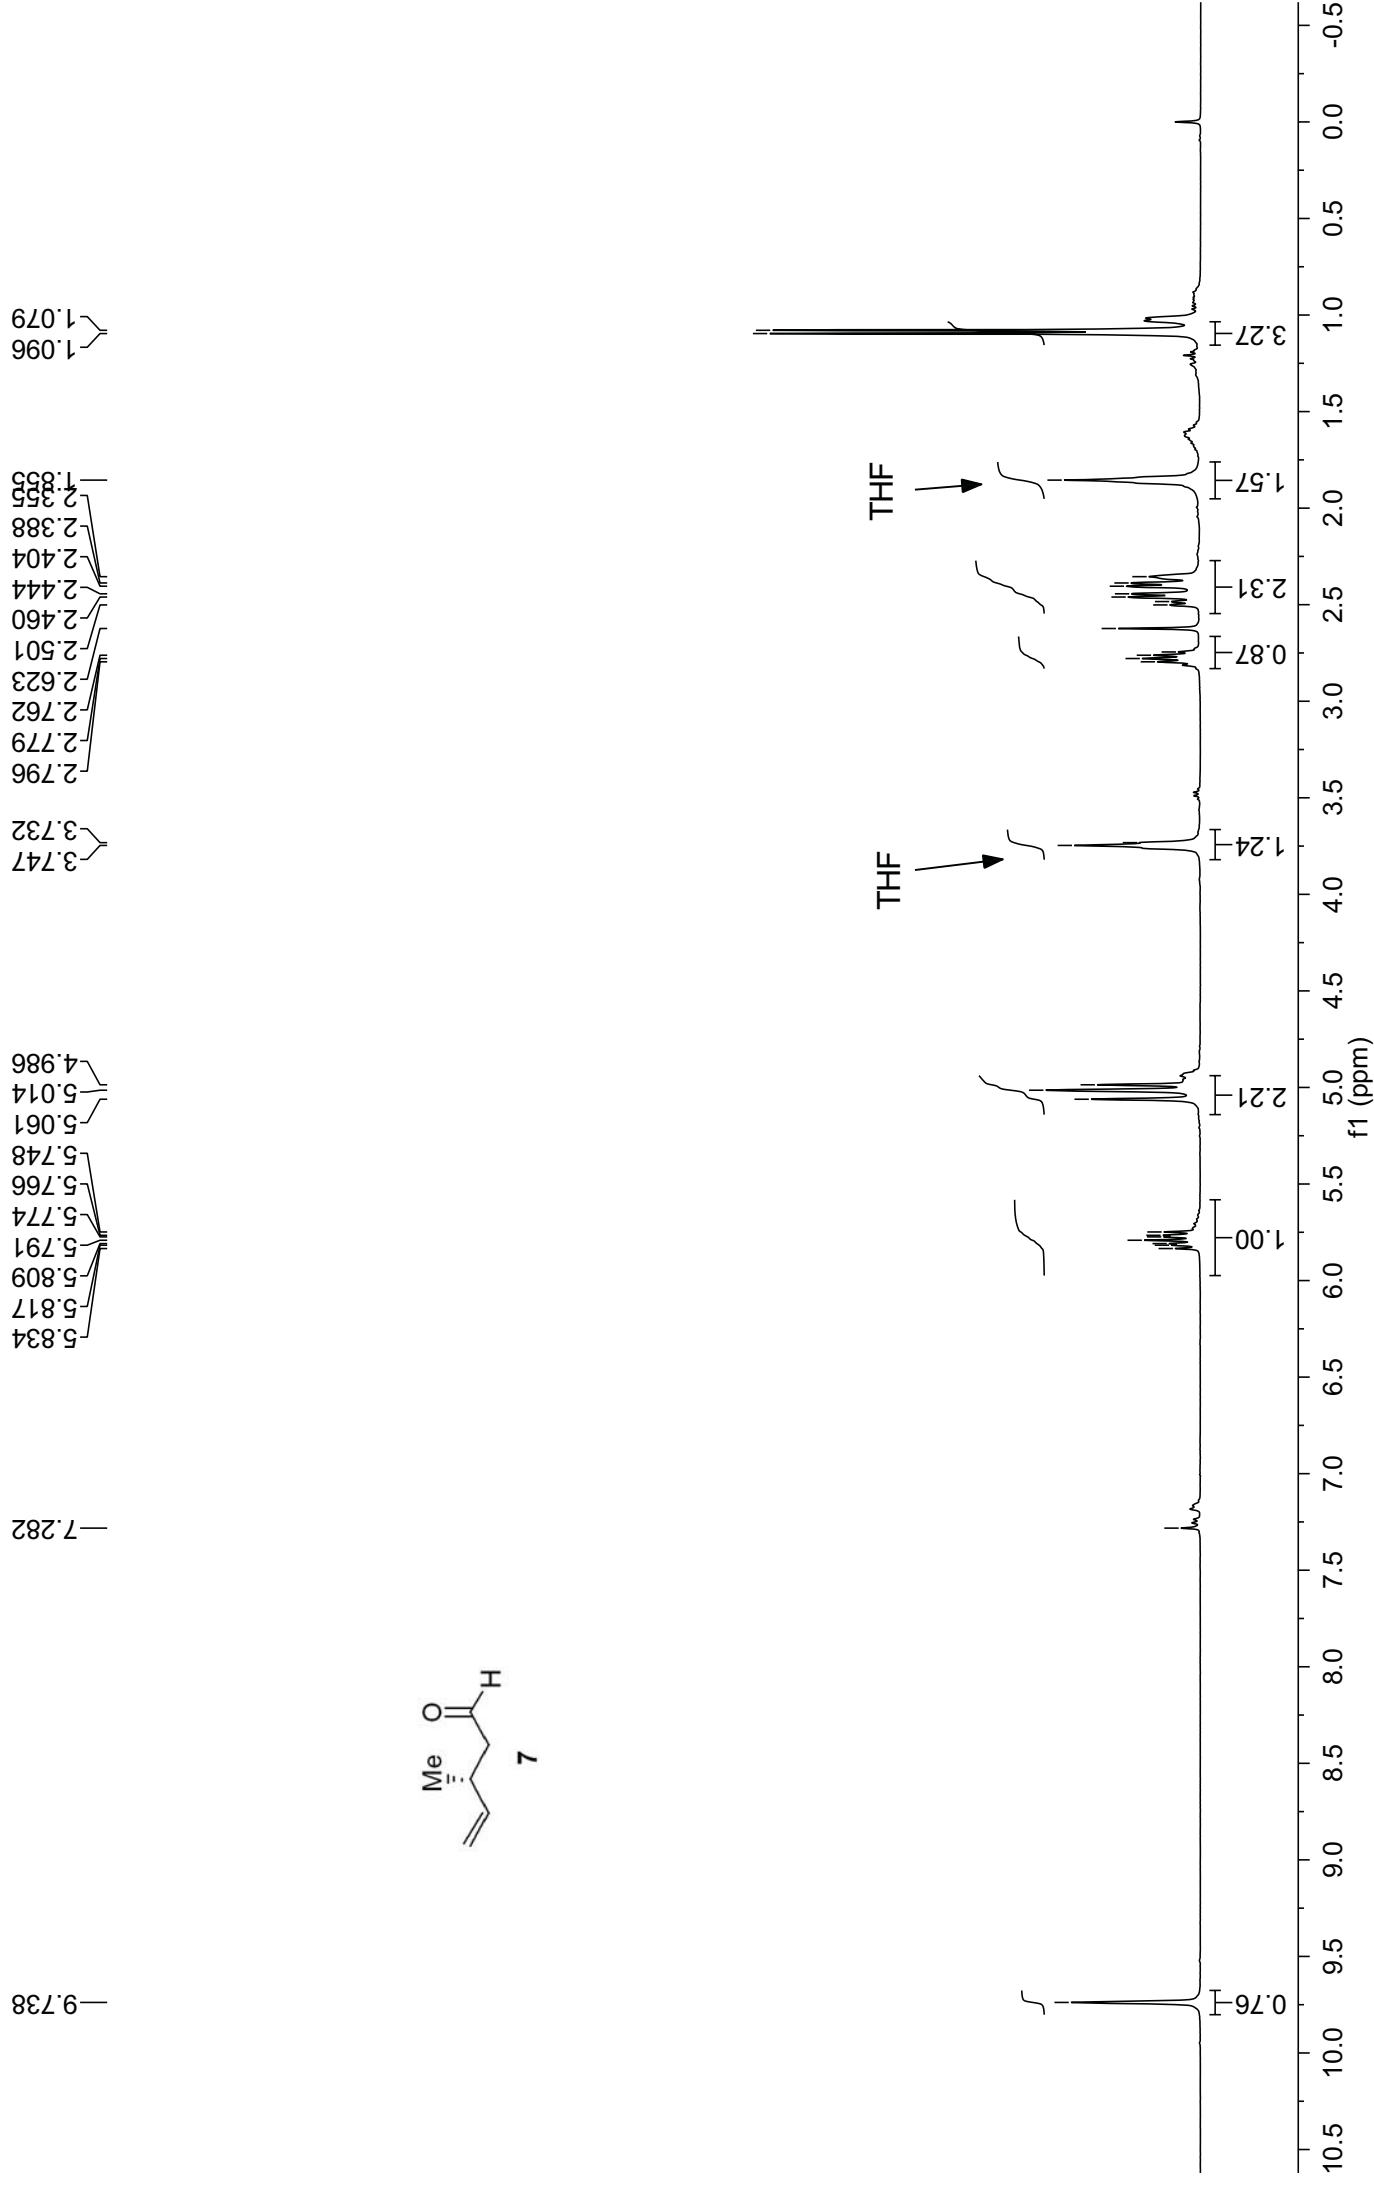

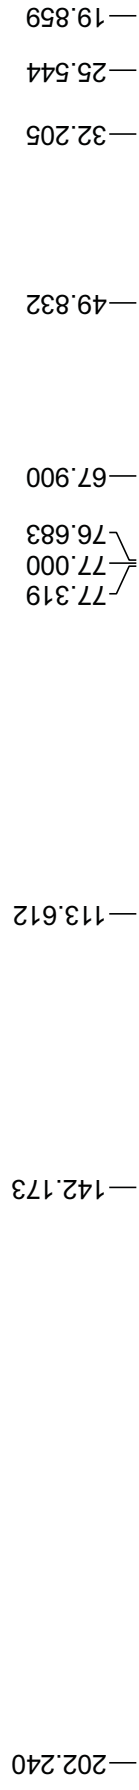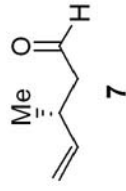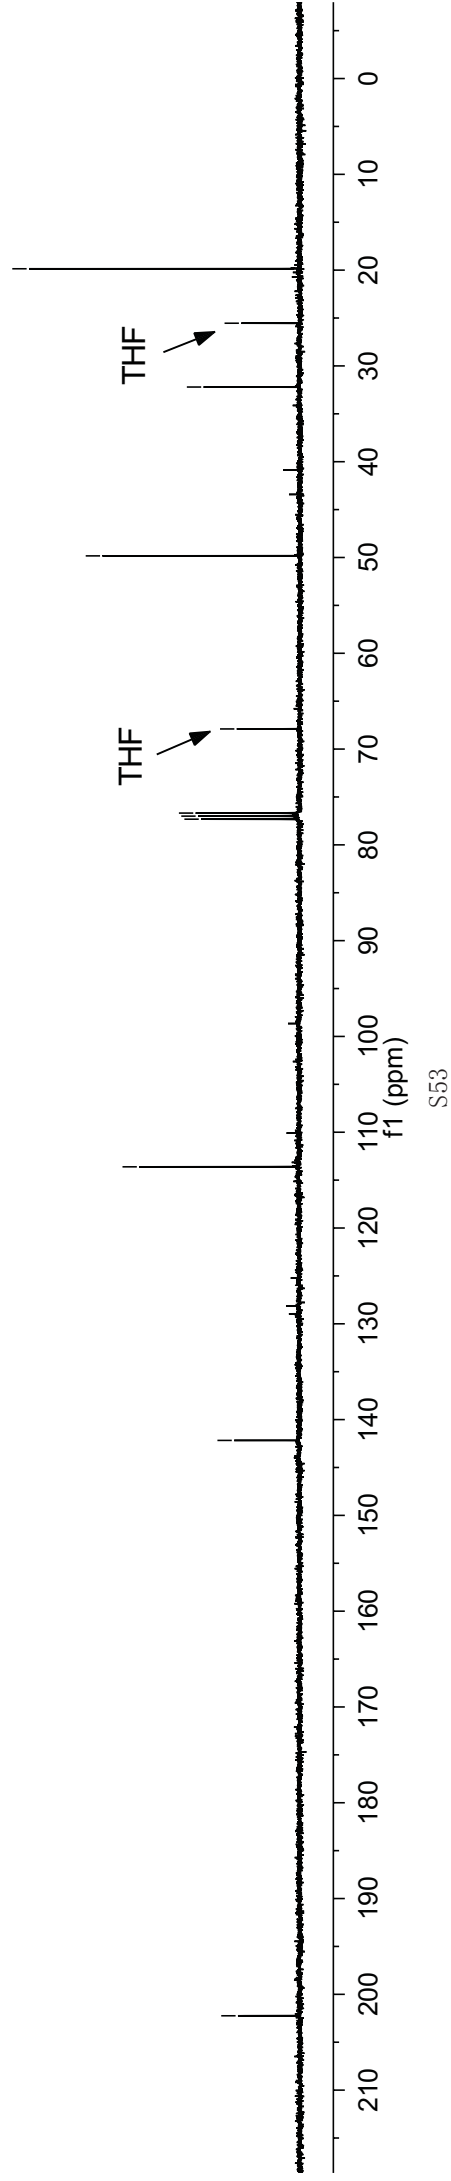

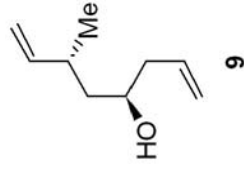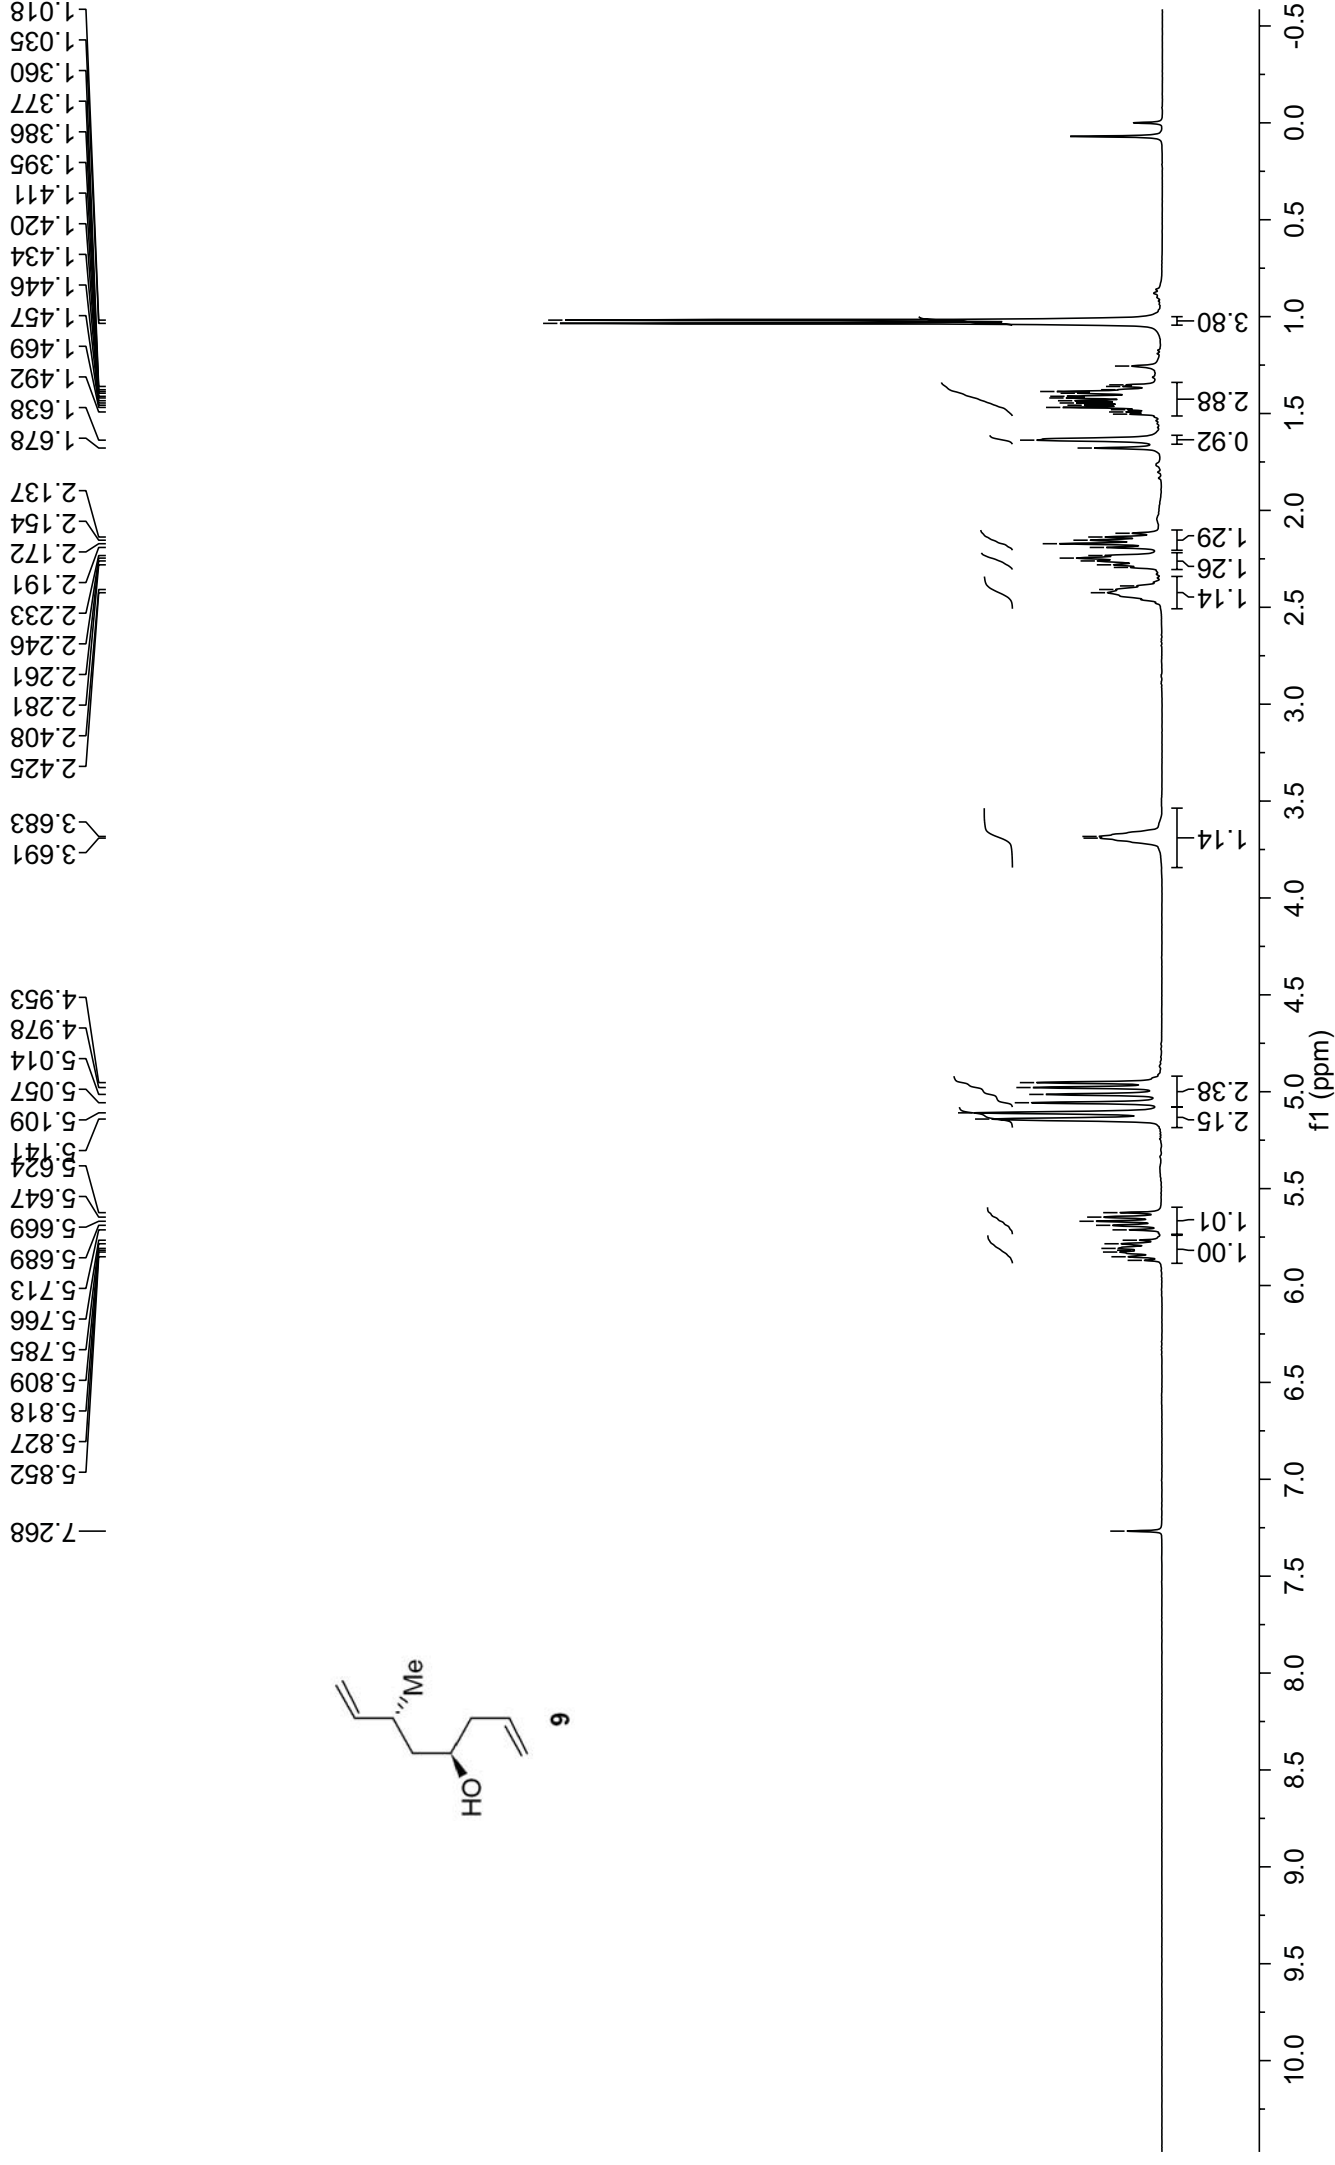

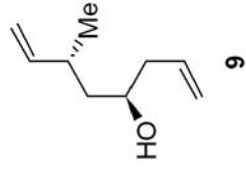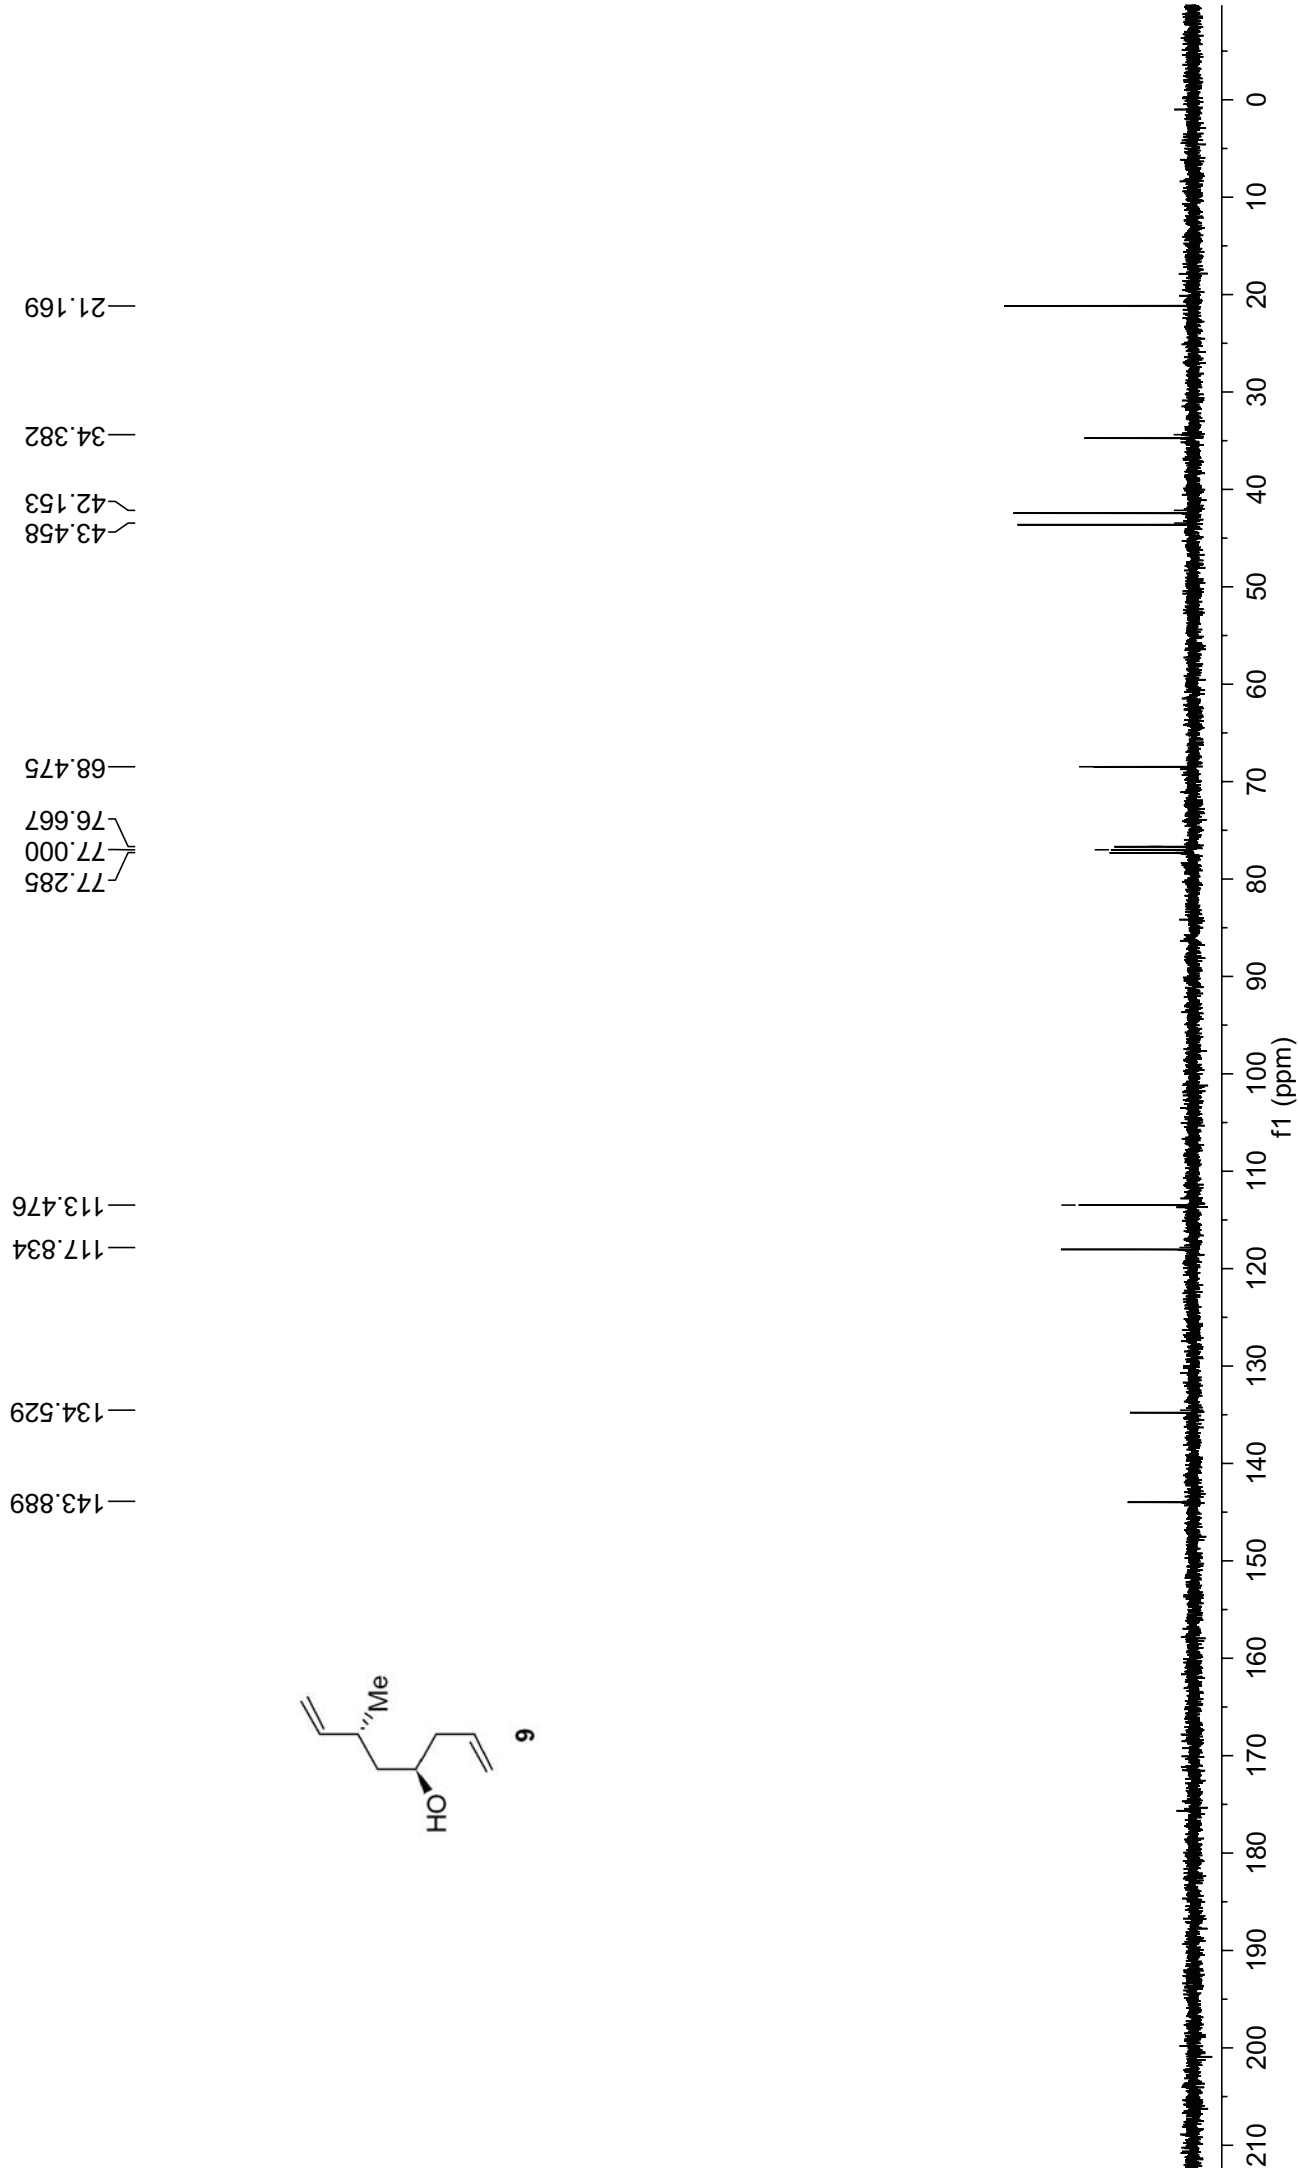

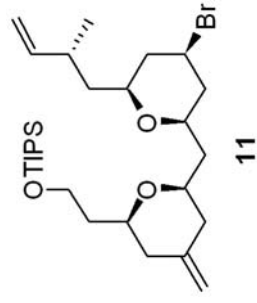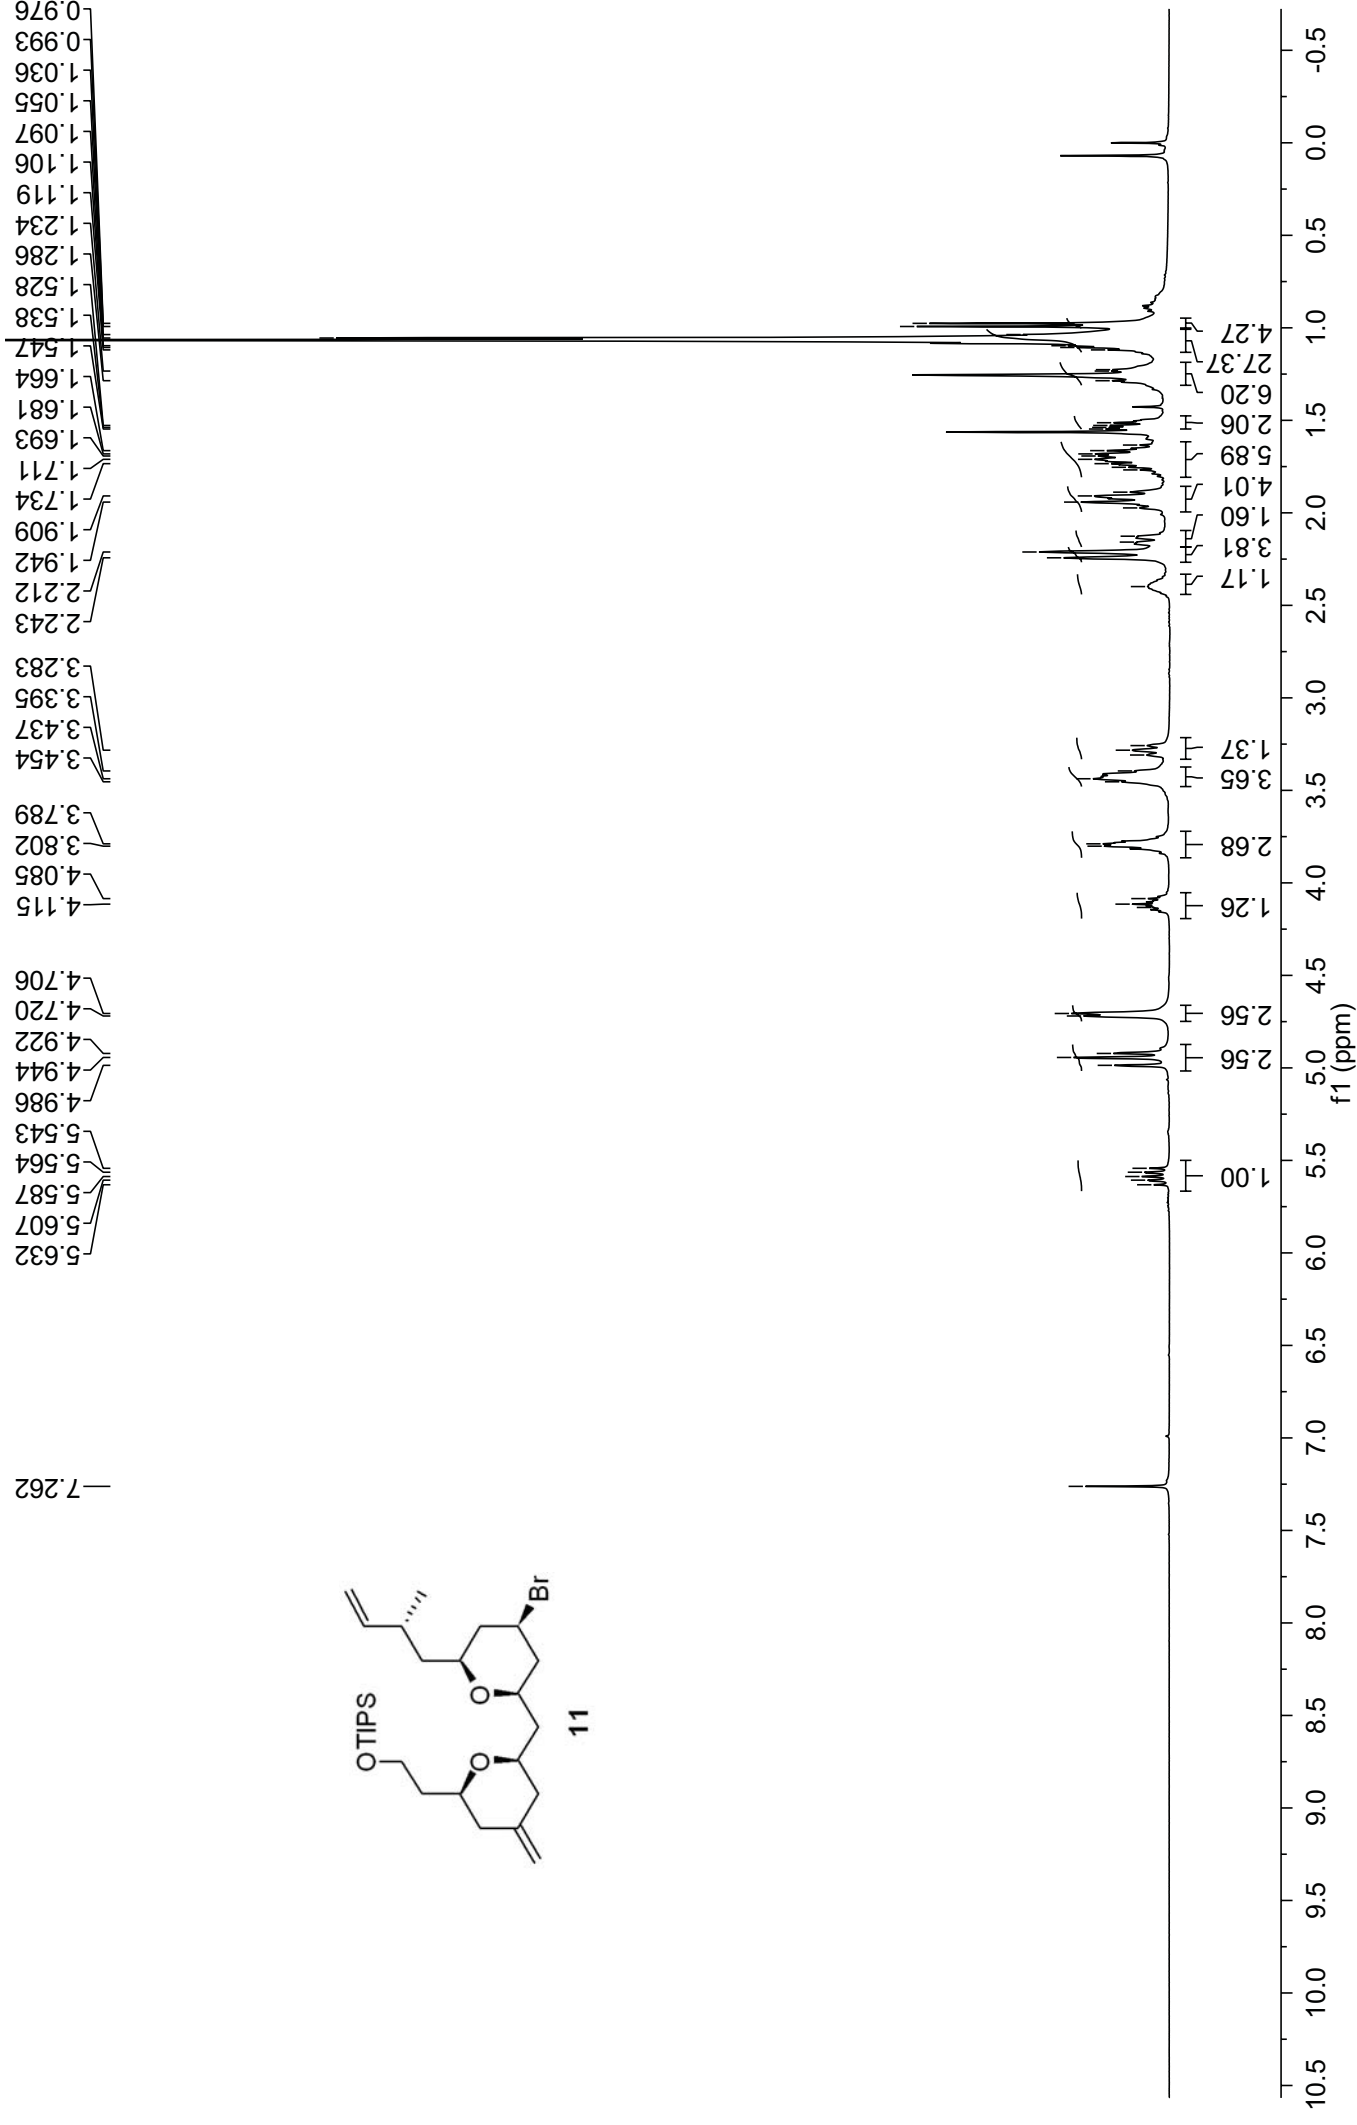



144.584  
143.730  
113.635  
108.539  
77.318  
77.000  
76.682  
75.320  
75.269  
74.546  
73.915  
59.806  
46.862  
43.762  
43.259  
42.678  
42.190  
40.970  
40.422  
39.541  
34.397  
21.133  
18.049  
11.978

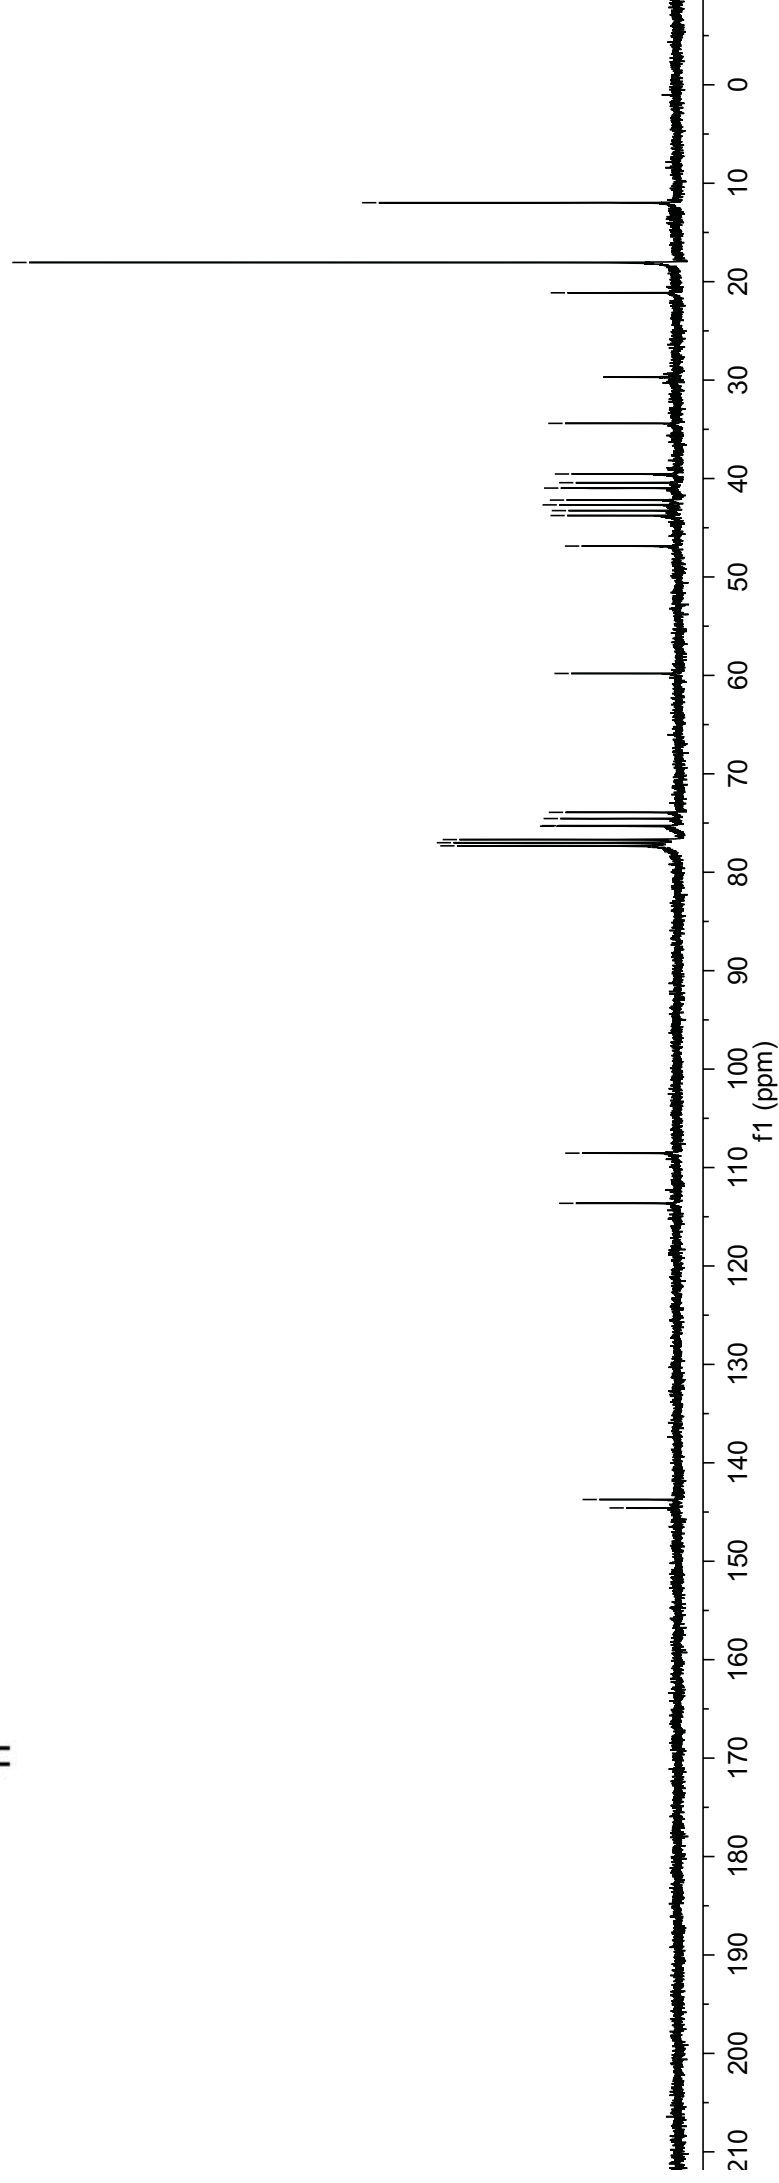

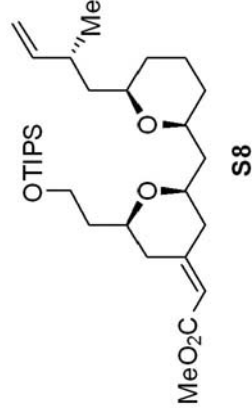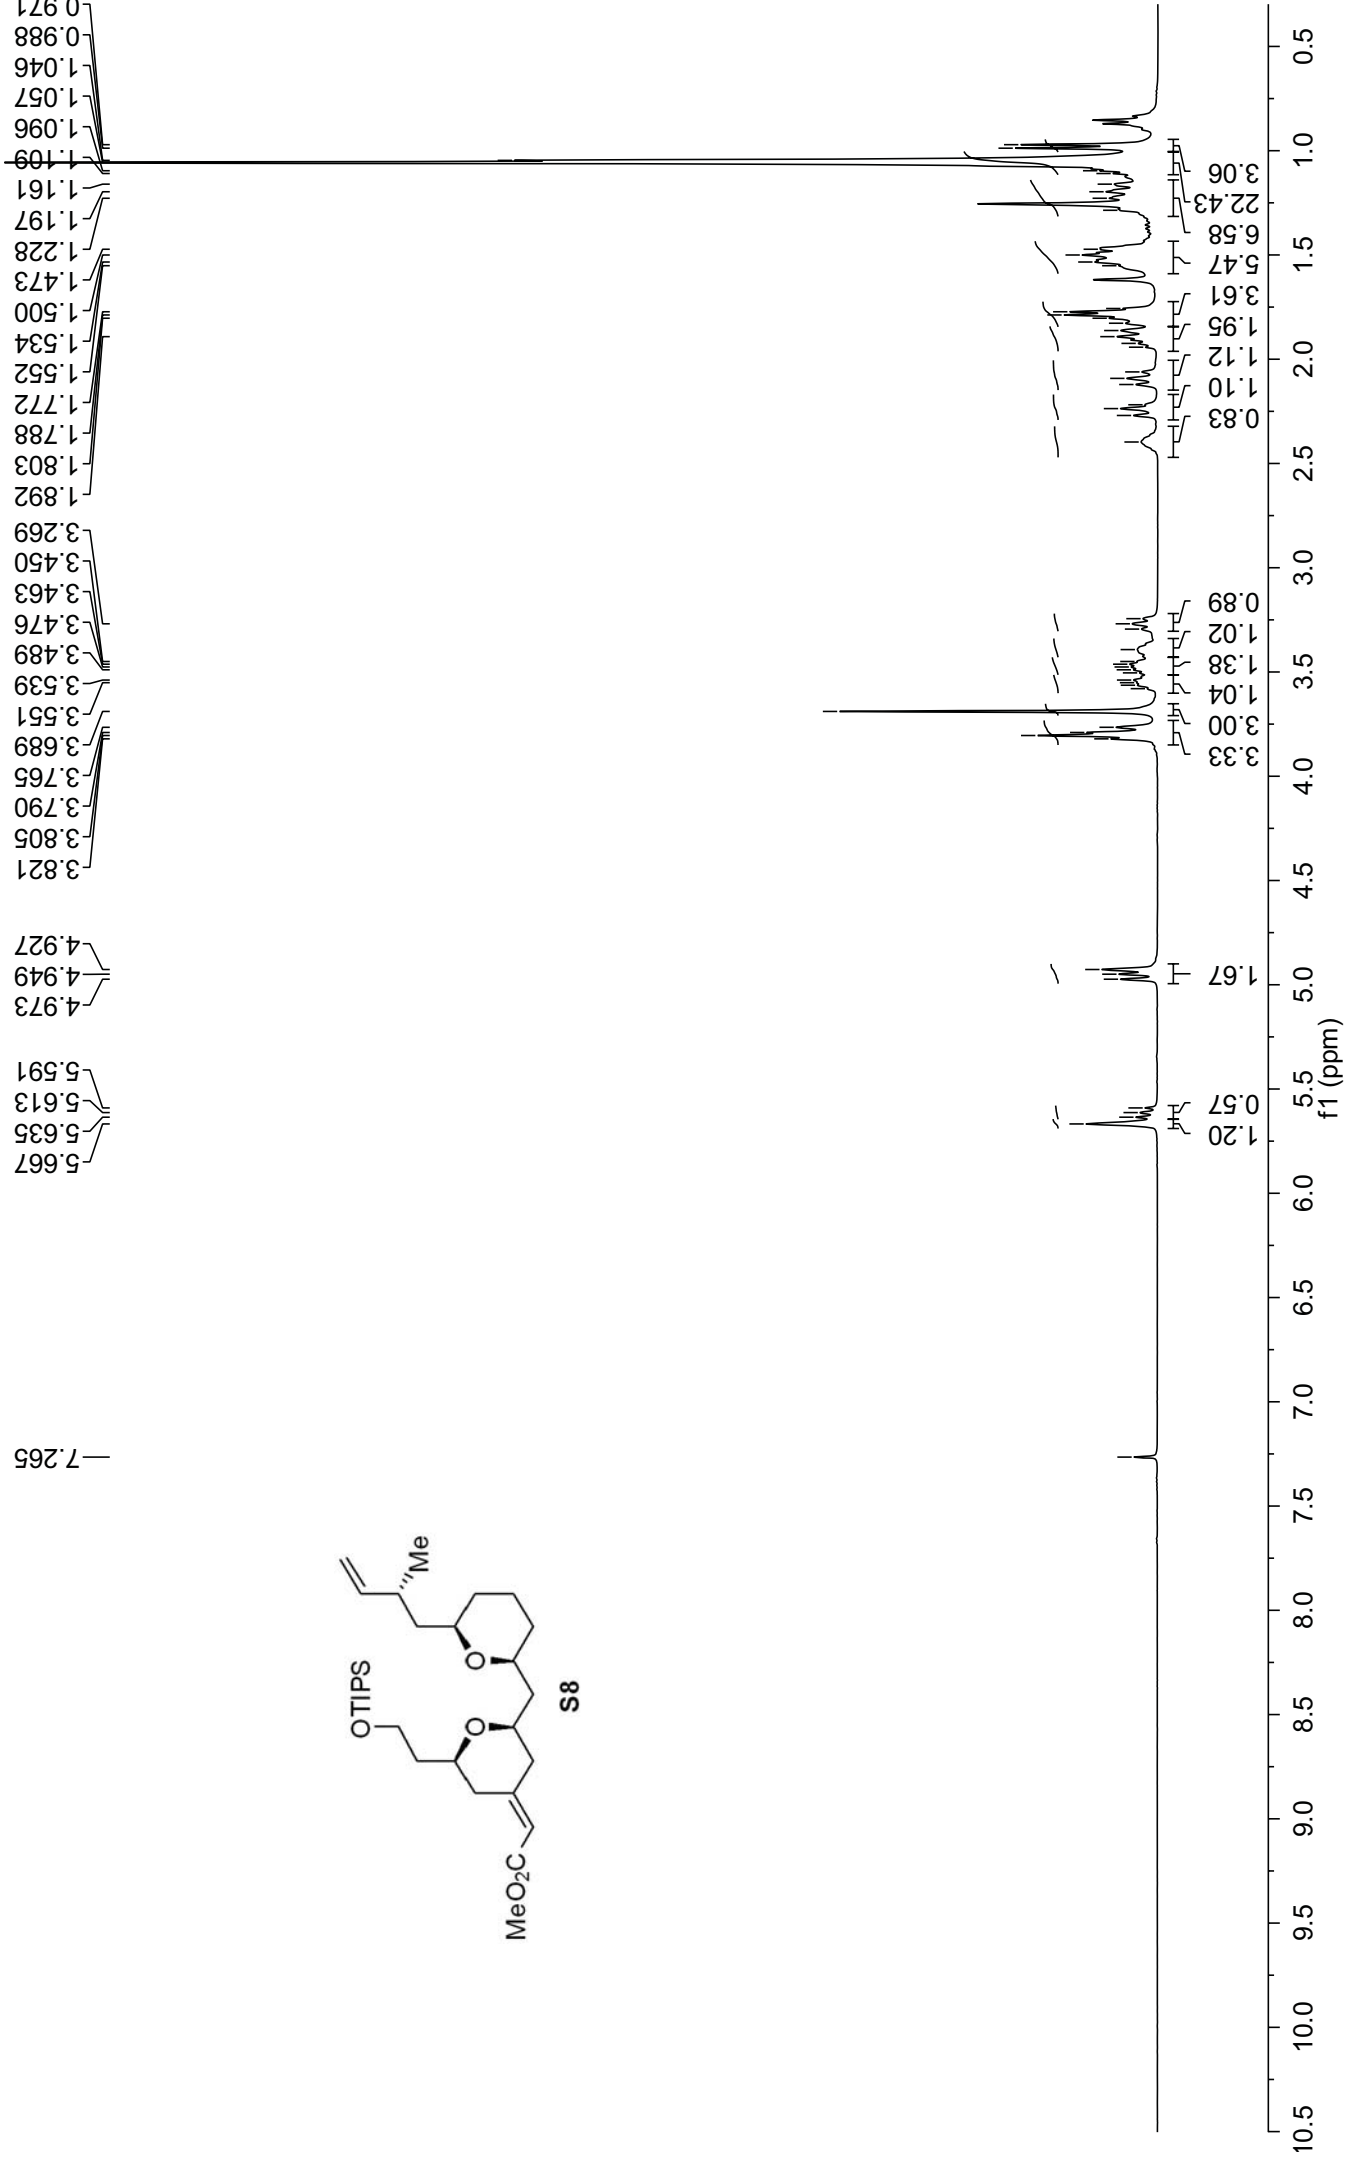

—166.909  
—157.992  
—144.289

~114.076  
~113.087

—59.734  
~73.860  
~74.234  
~74.587  
~75.486  
~76.682  
~77.000  
~77.318

—50.933  
~43.445  
~42.838  
~42.355  
~39.700  
~36.184  
~34.274  
~32.020  
~31.598  
~23.675  
~21.151  
~18.030  
~11.970

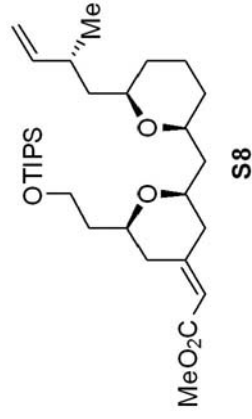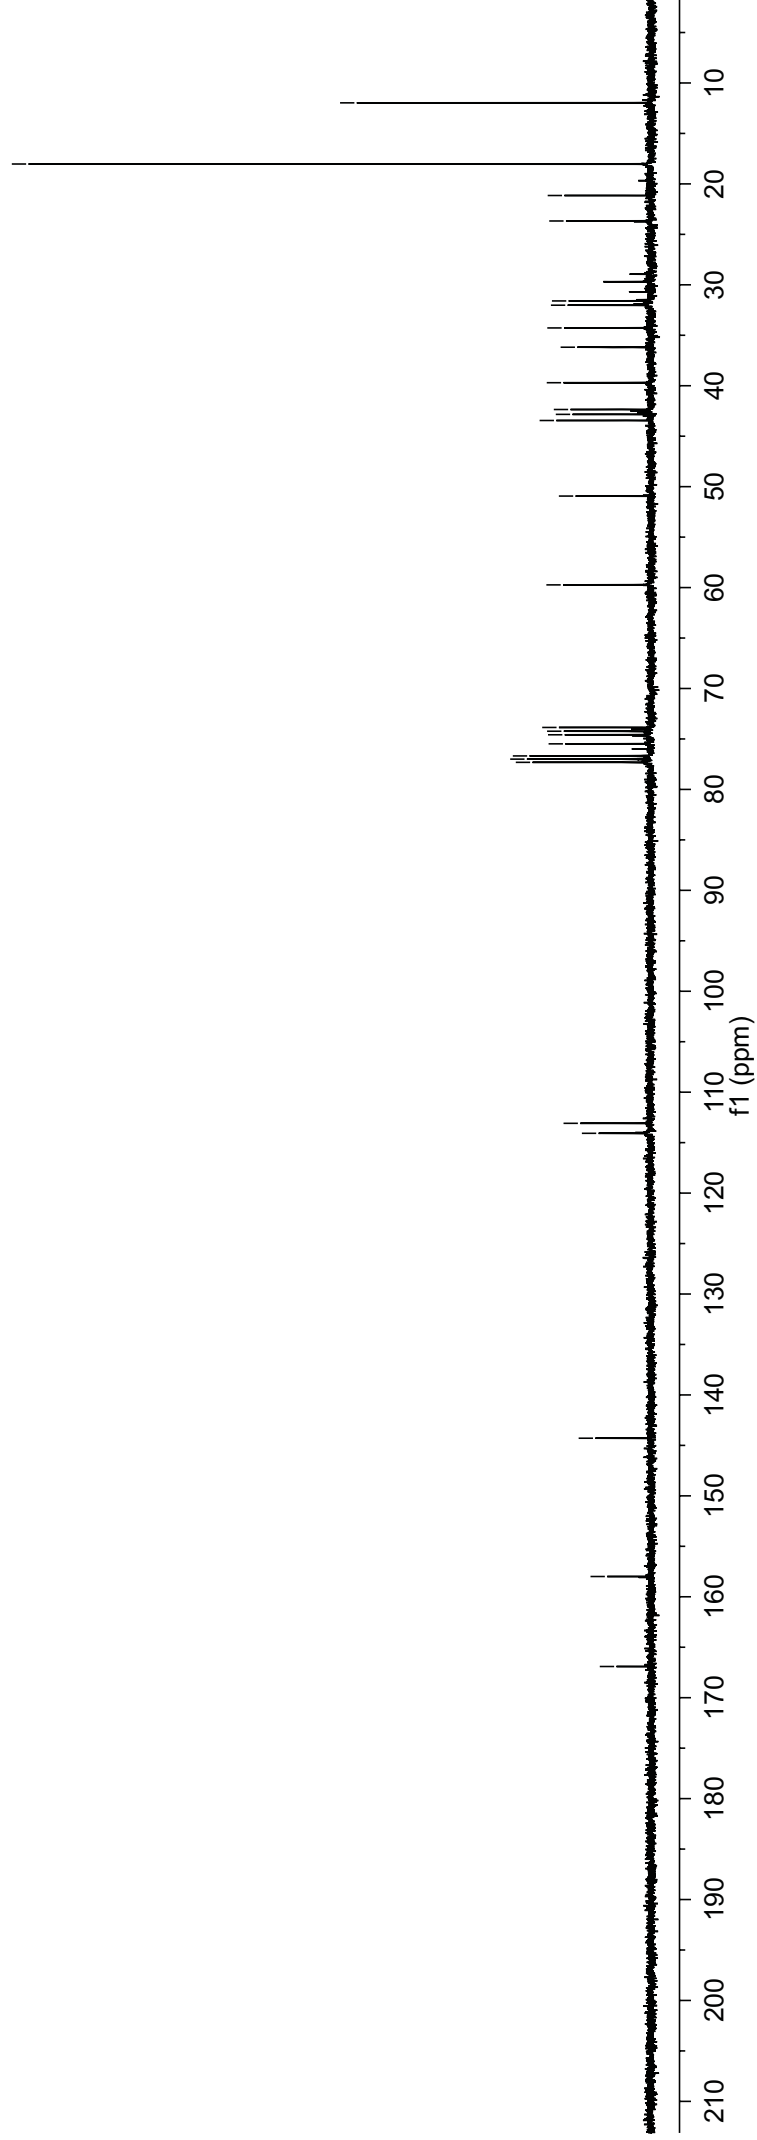

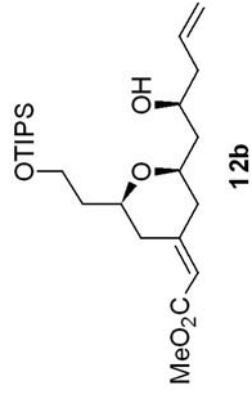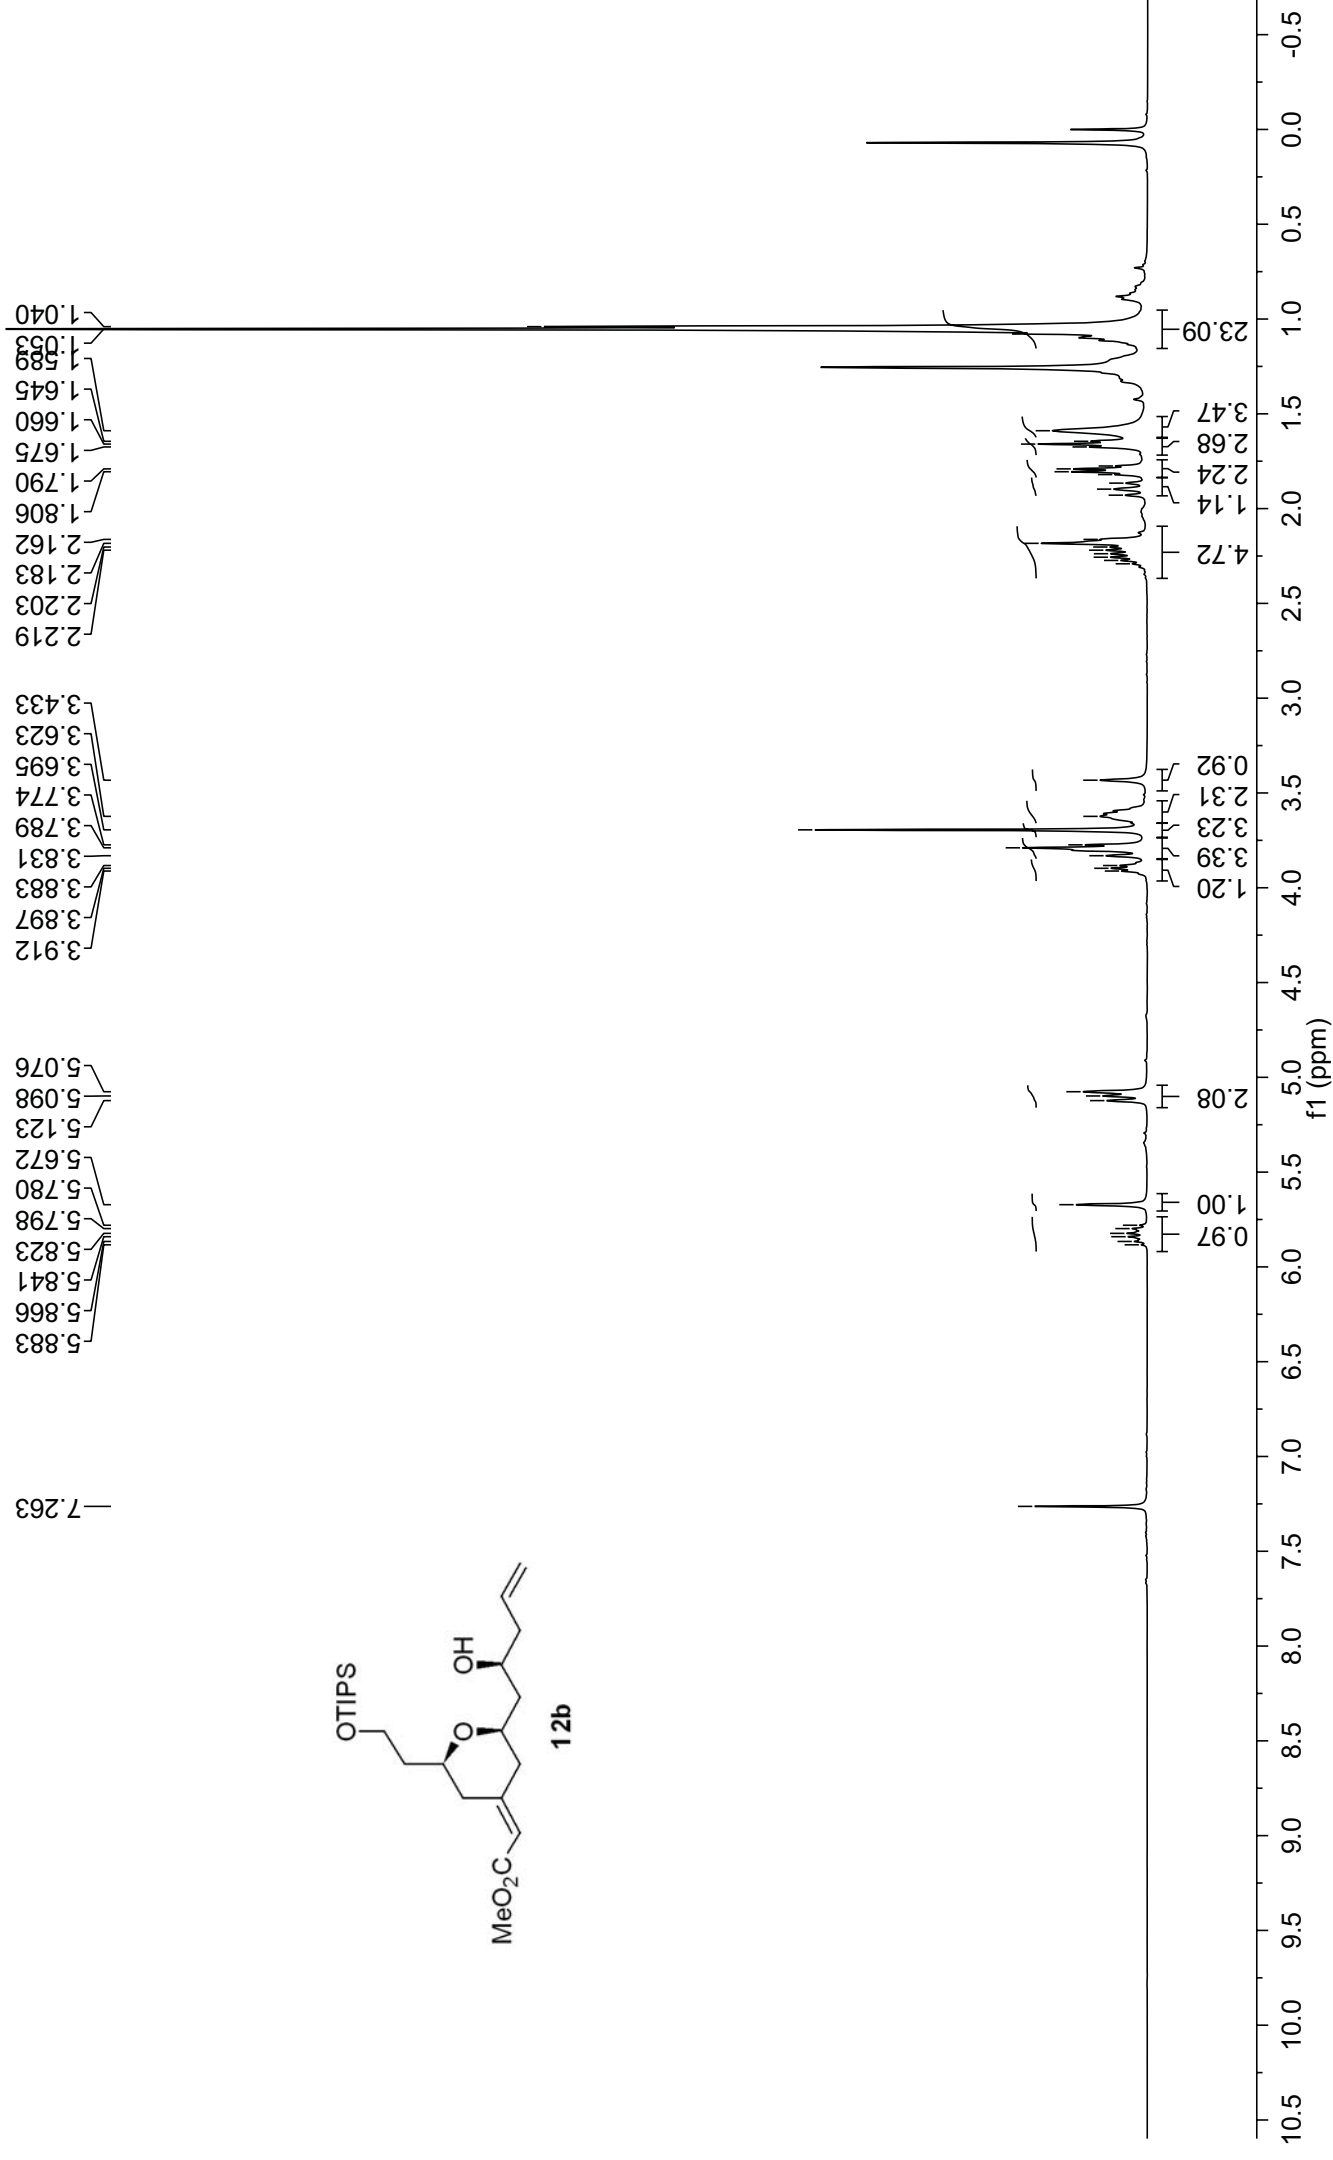

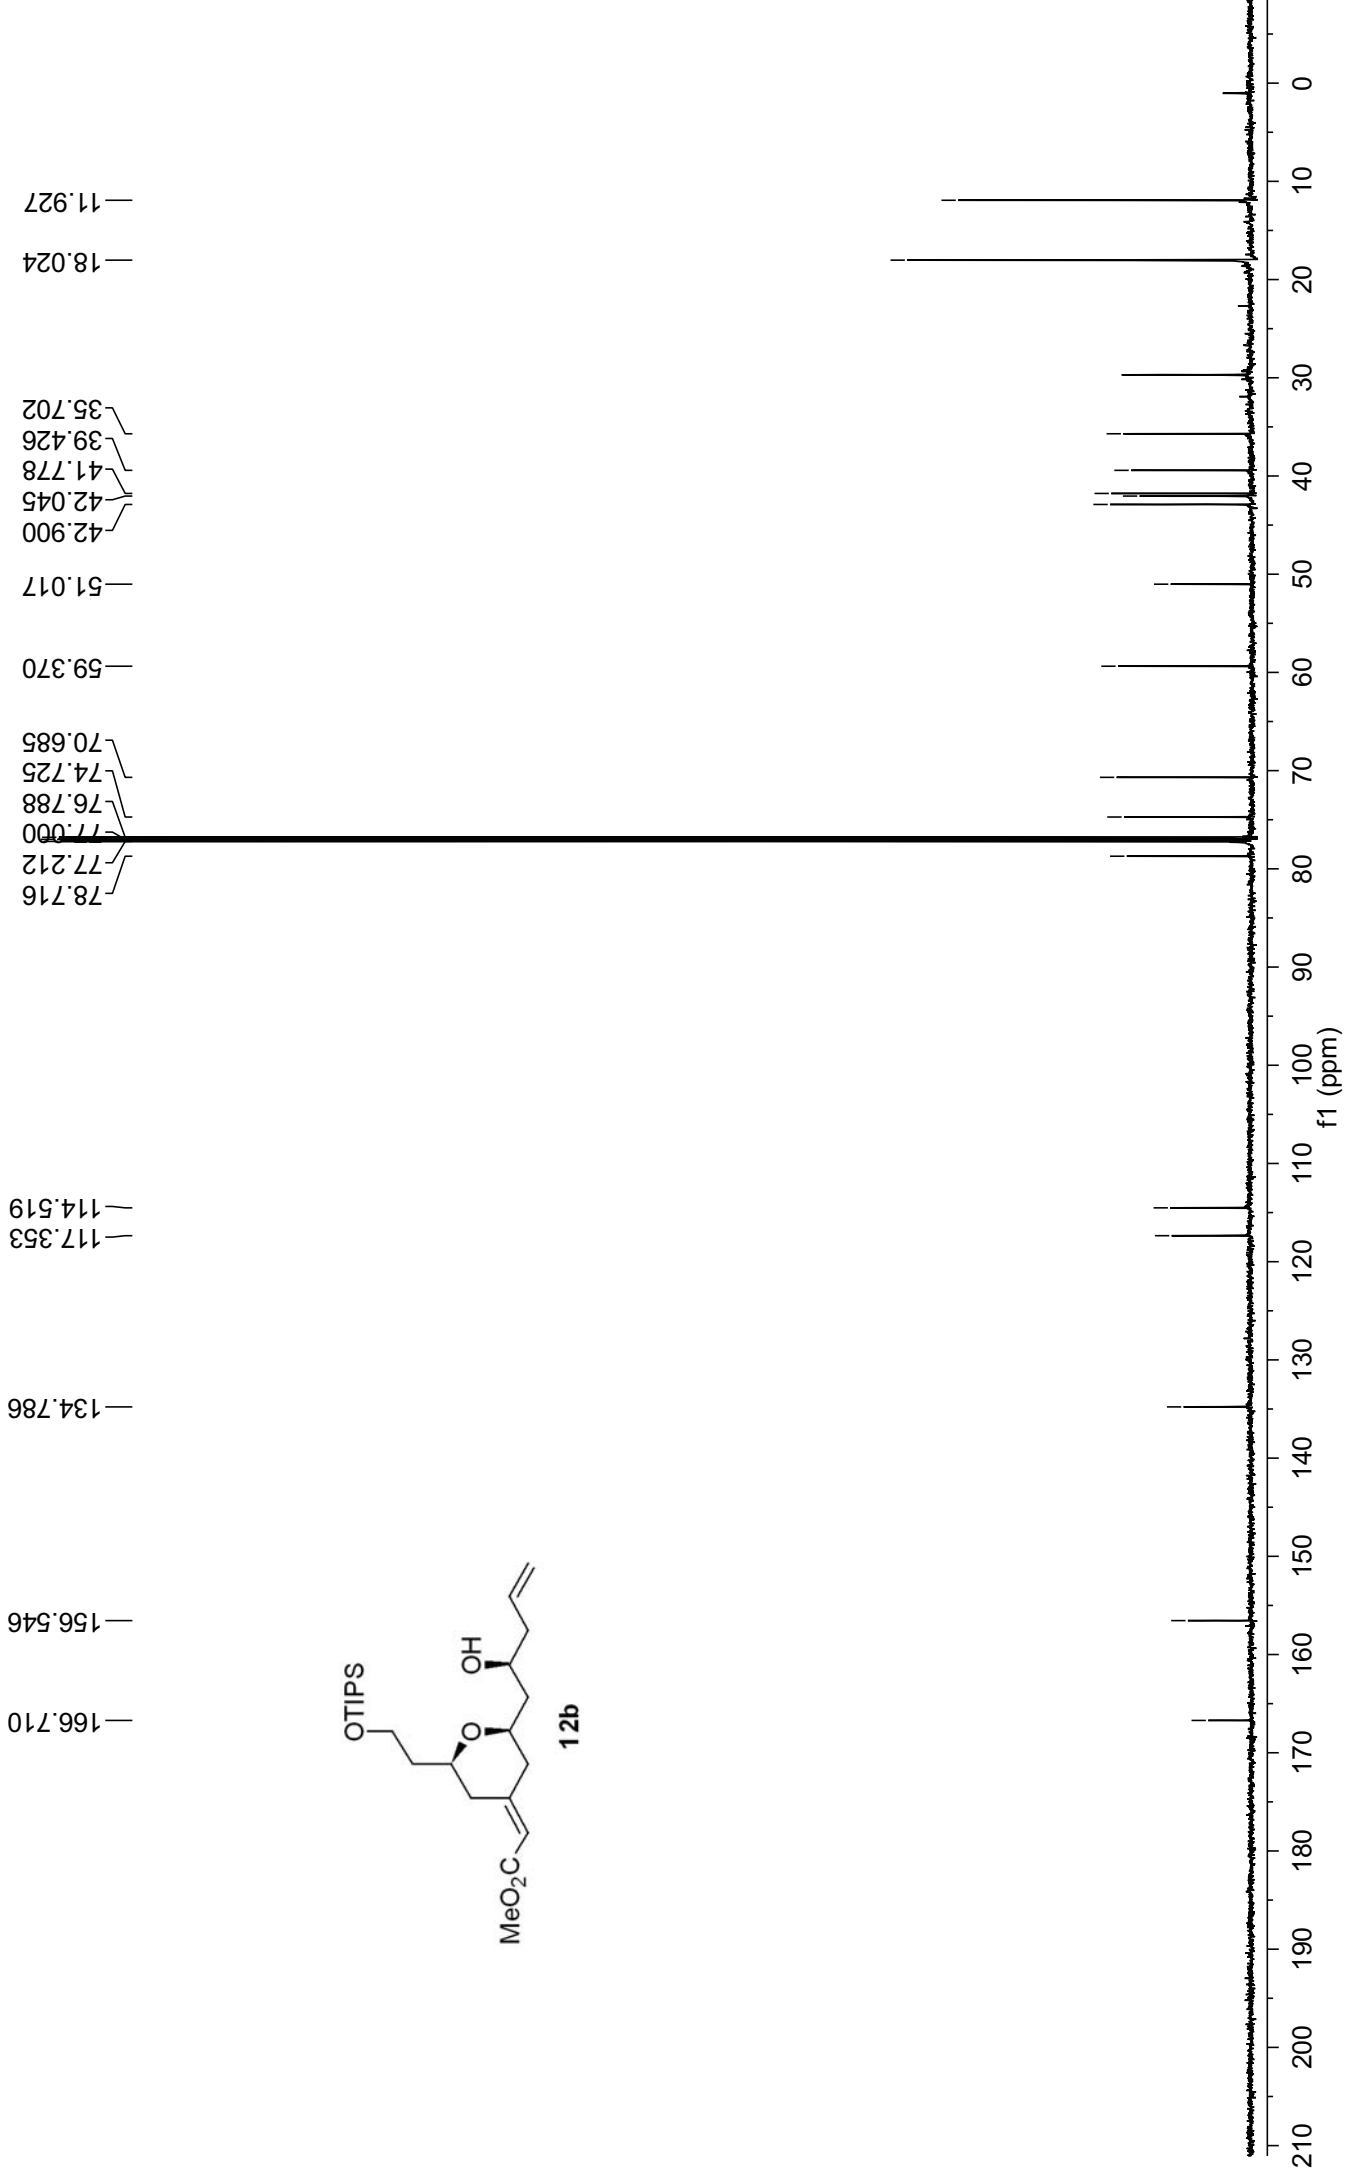

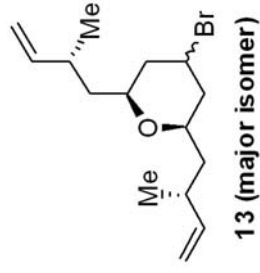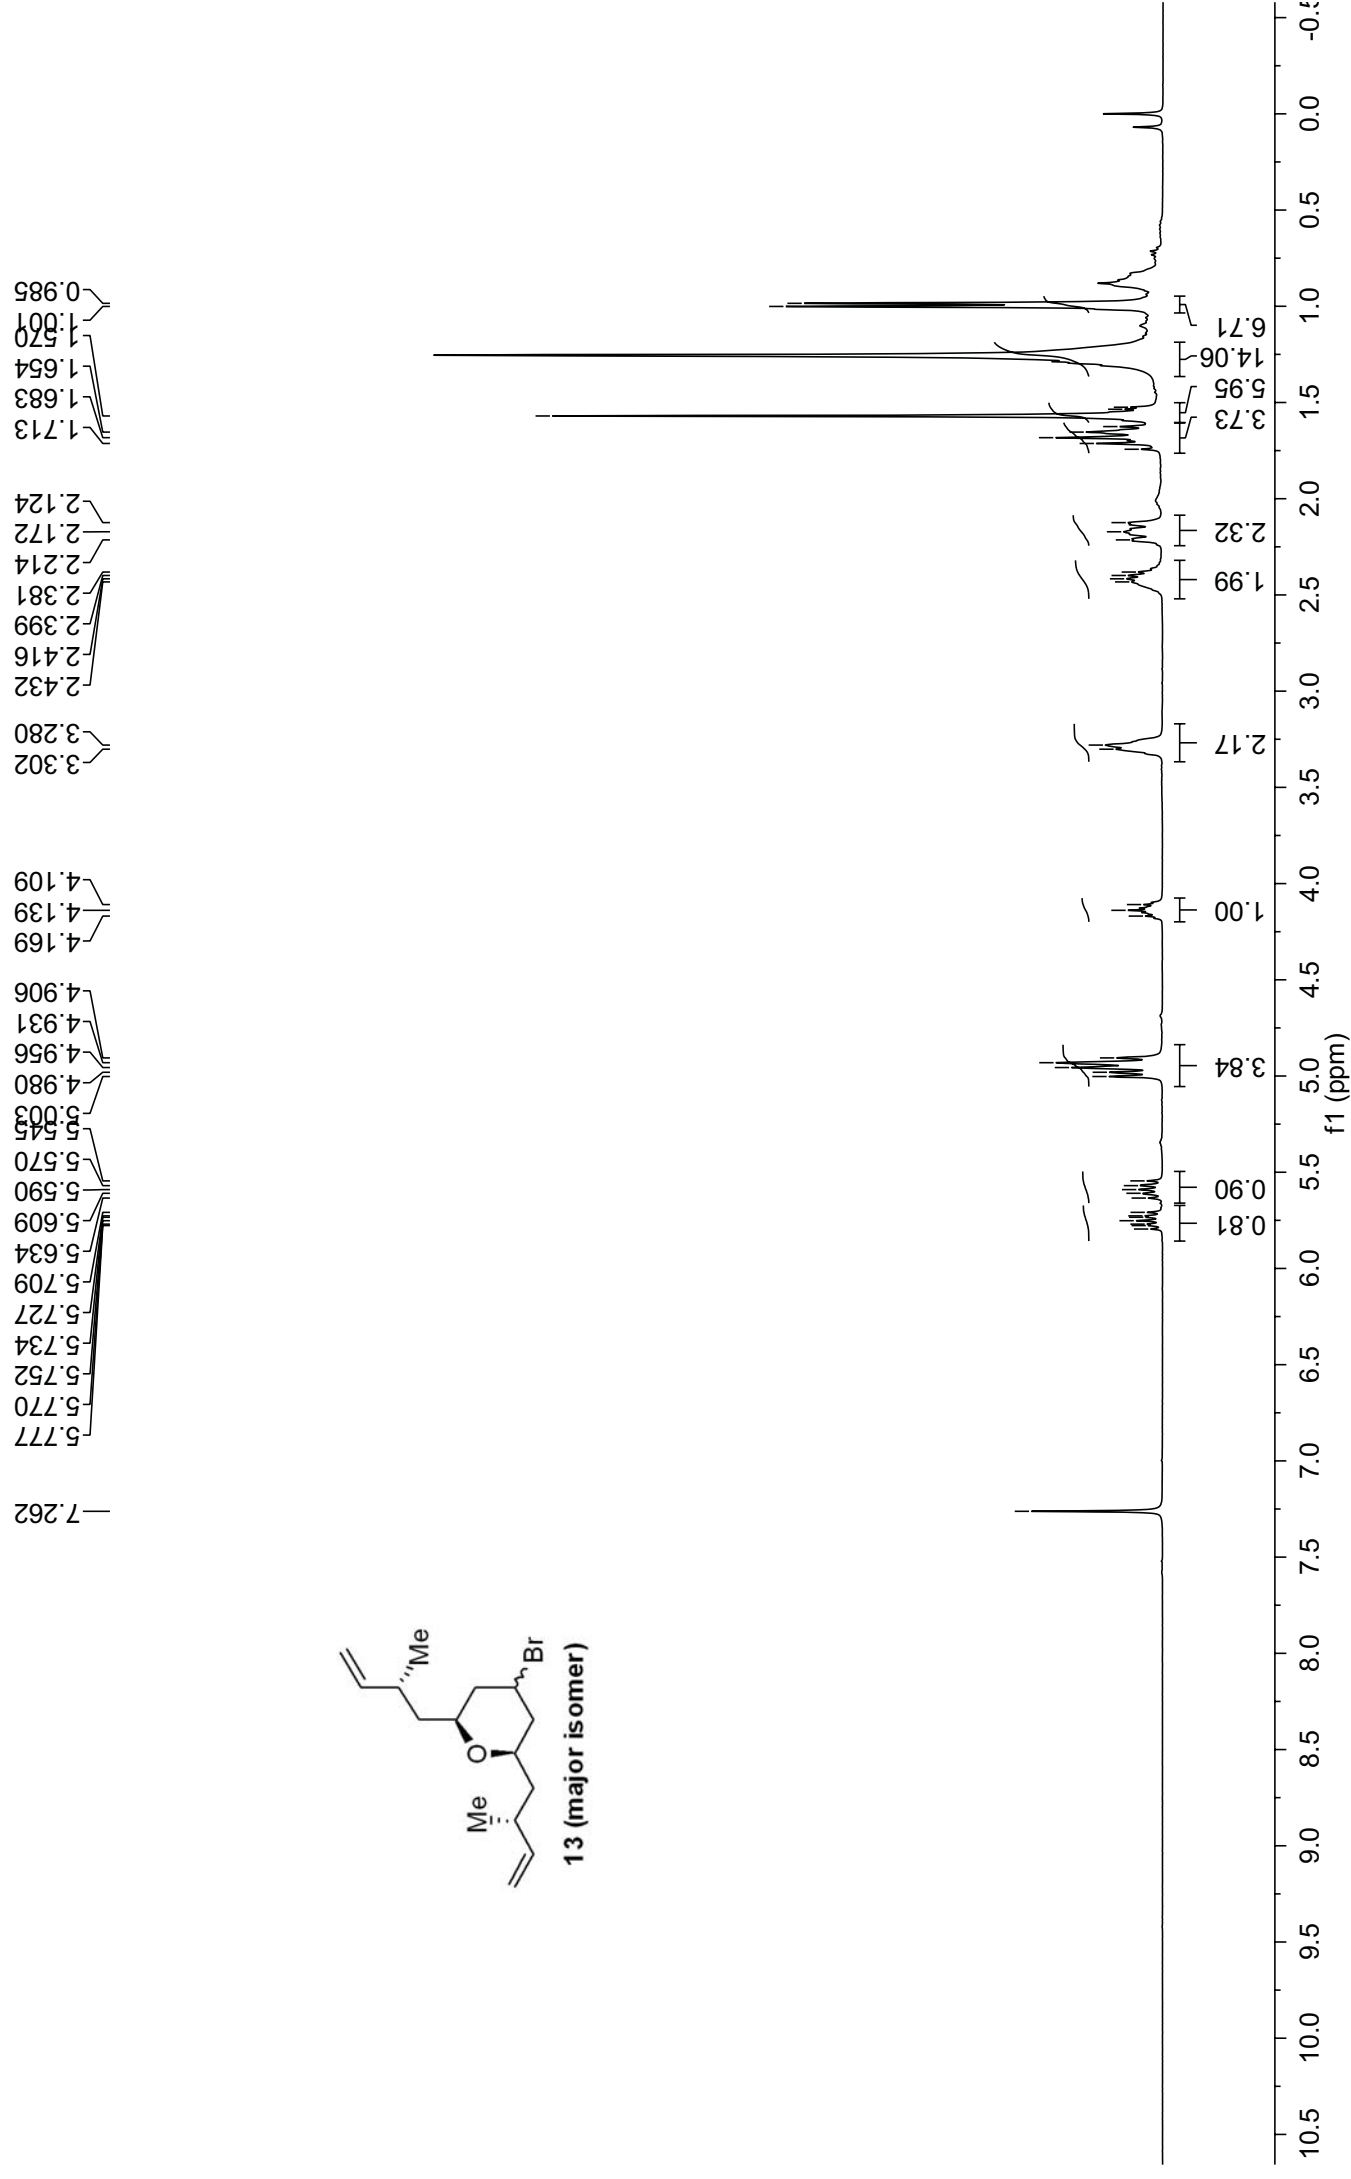

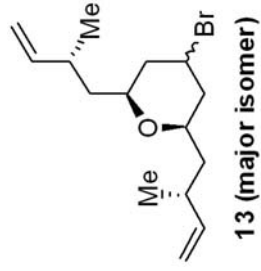

|         |         |         |         |        |        |        |        |        |        |        |        |        |        |        |        |        |        |
|---------|---------|---------|---------|--------|--------|--------|--------|--------|--------|--------|--------|--------|--------|--------|--------|--------|--------|
| 144.352 | 143.749 | 113.590 | 112.409 | 77.211 | 77.000 | 76.788 | 75.311 | 75.021 | 47.059 | 43.817 | 43.653 | 42.696 | 42.343 | 34.419 | 33.424 | 21.140 | 19.148 |
|---------|---------|---------|---------|--------|--------|--------|--------|--------|--------|--------|--------|--------|--------|--------|--------|--------|--------|

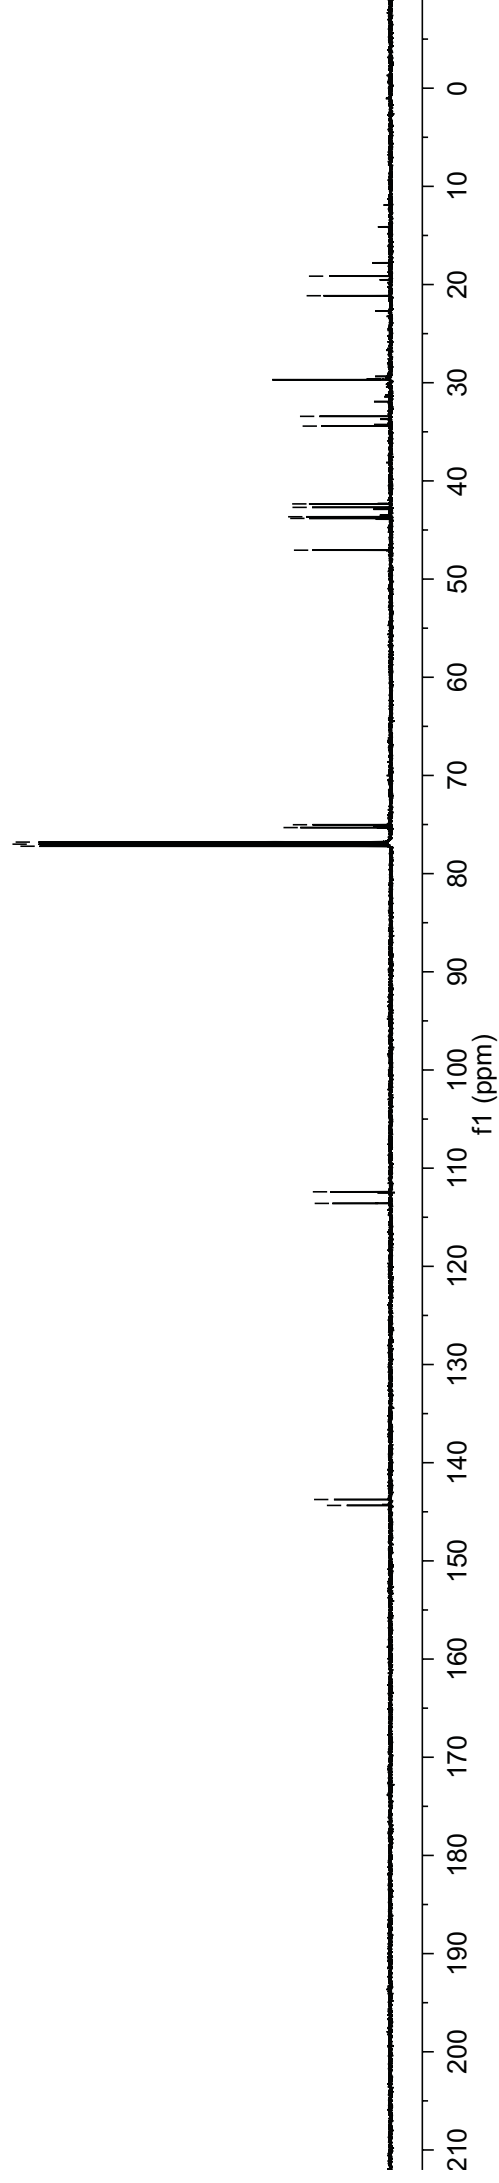

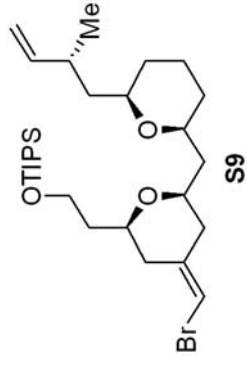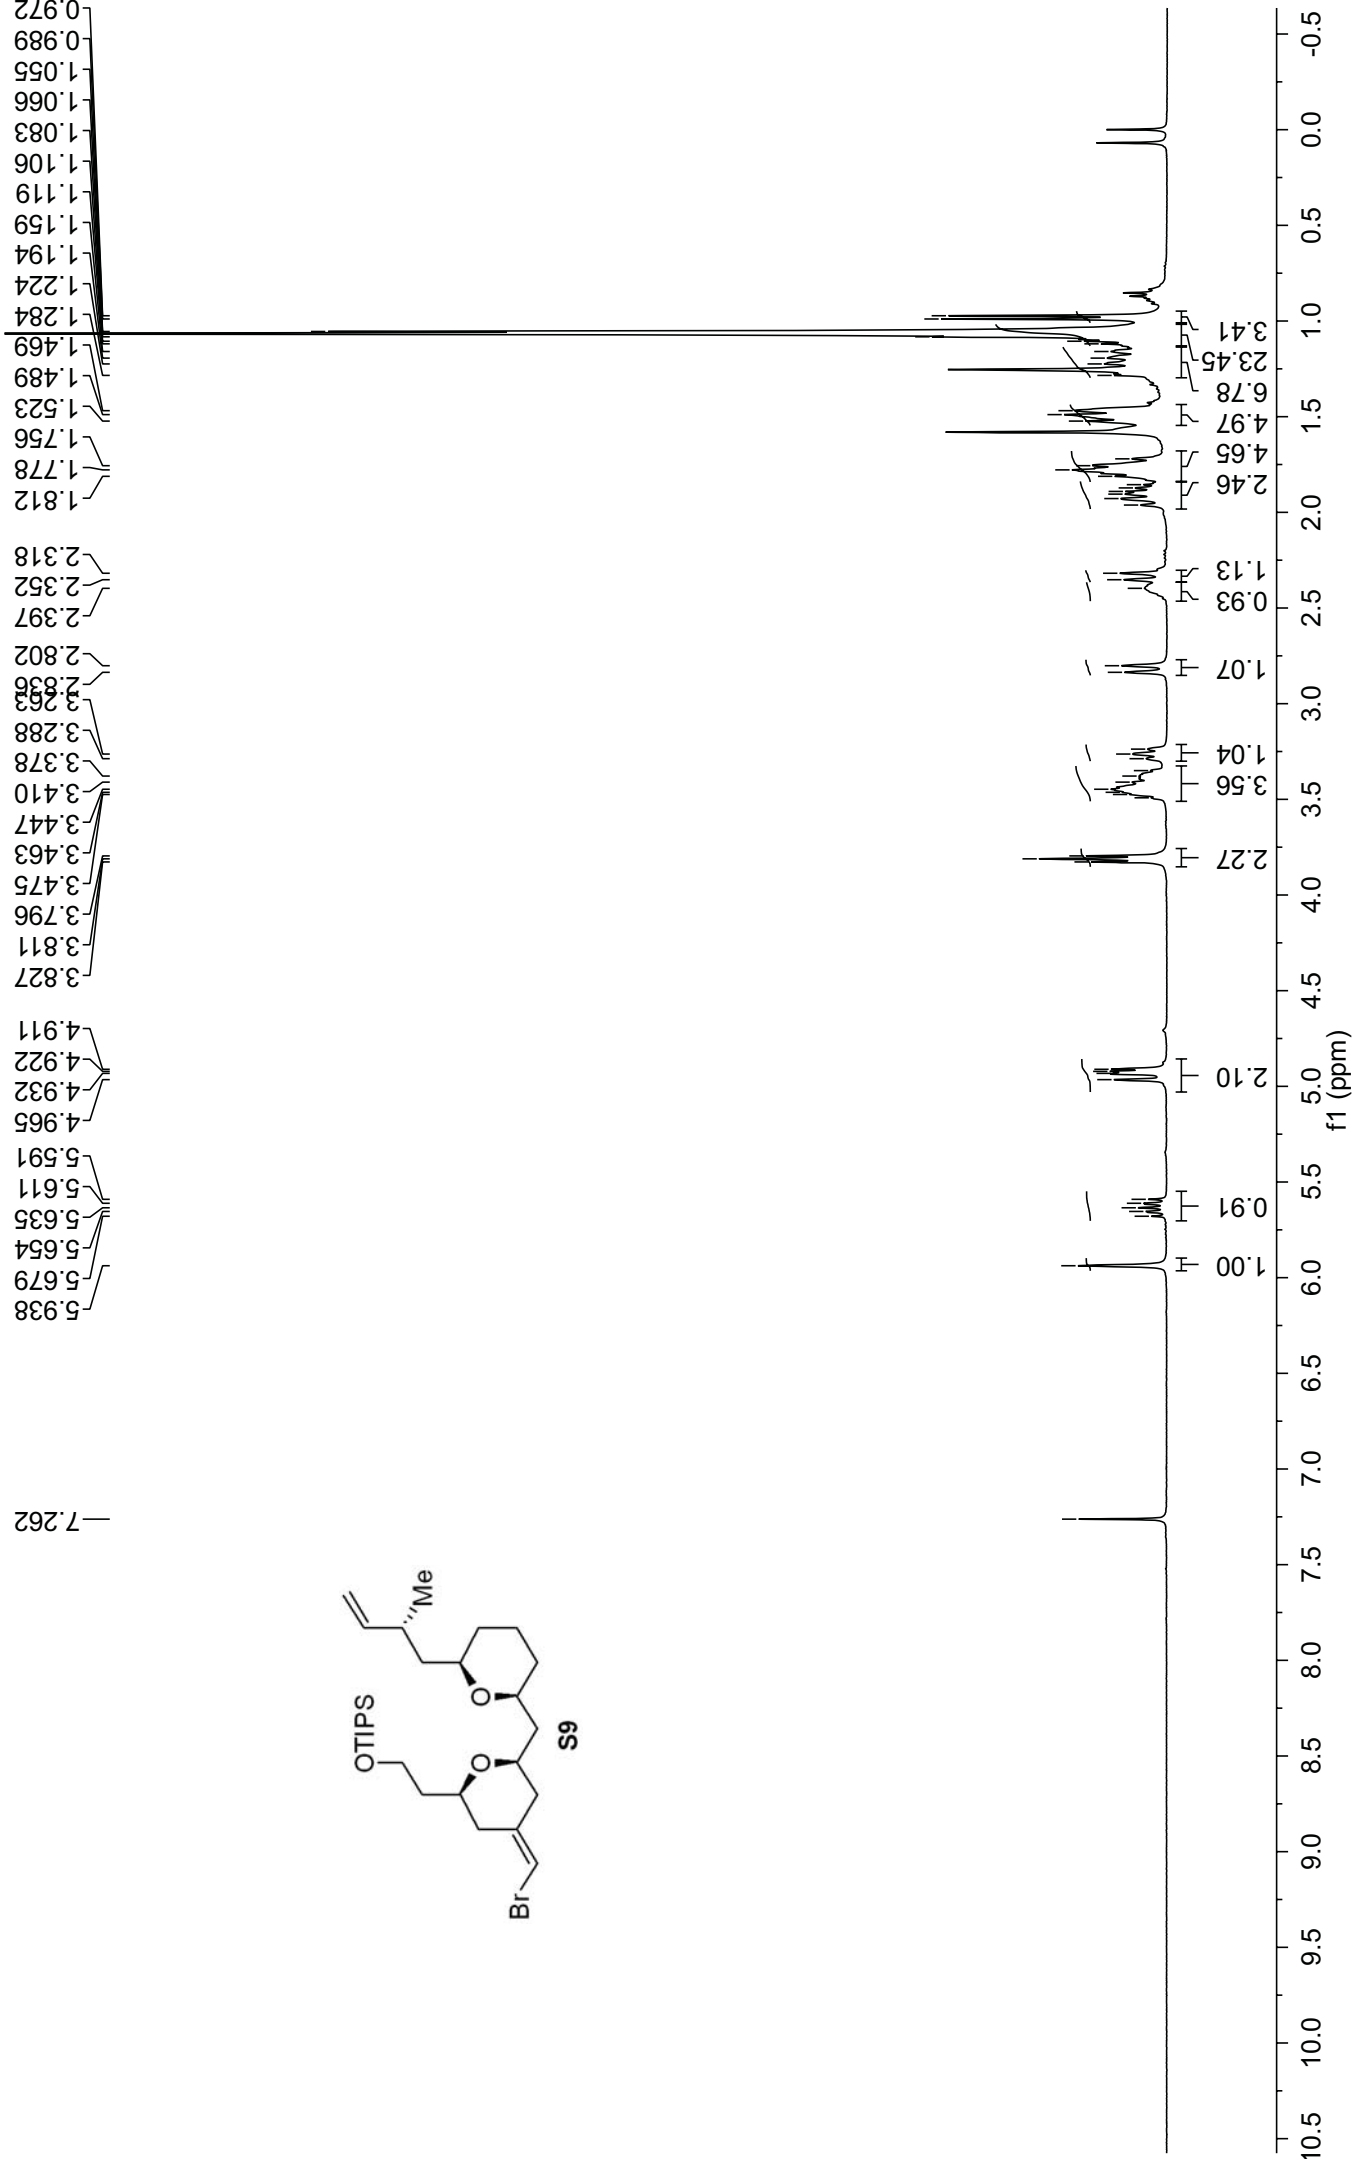

11.974  
 18.046  
 21.102  
 23.680  
 31.608  
 32.019  
 34.263  
 37.124  
 39.539  
 40.528  
 42.504  
 43.442  
 59.791  
 73.931  
 73.962  
 74.376  
 75.484  
 76.788  
 77.000  
 77.212  
 99.404  
 113.022  
 140.688  
 144.334

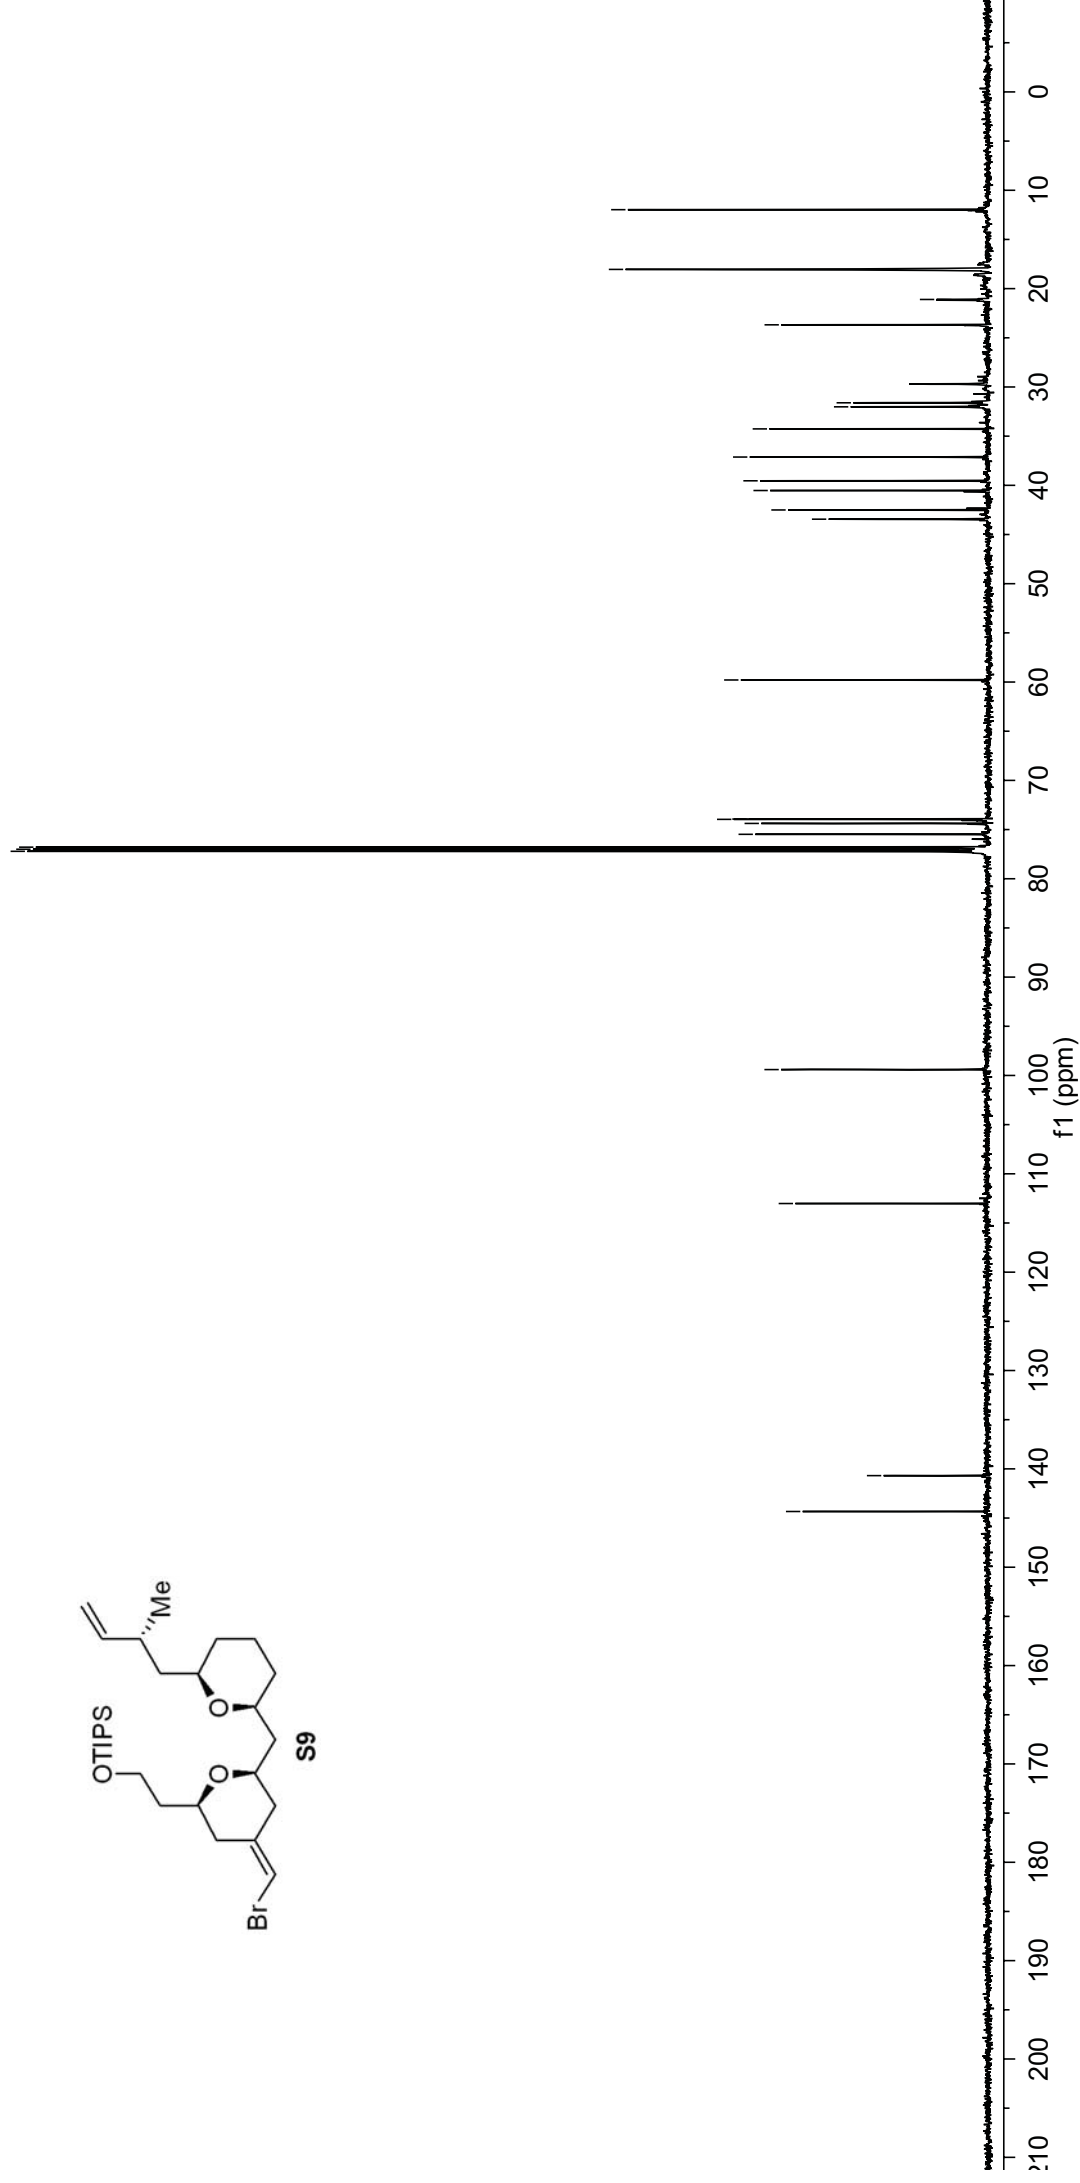

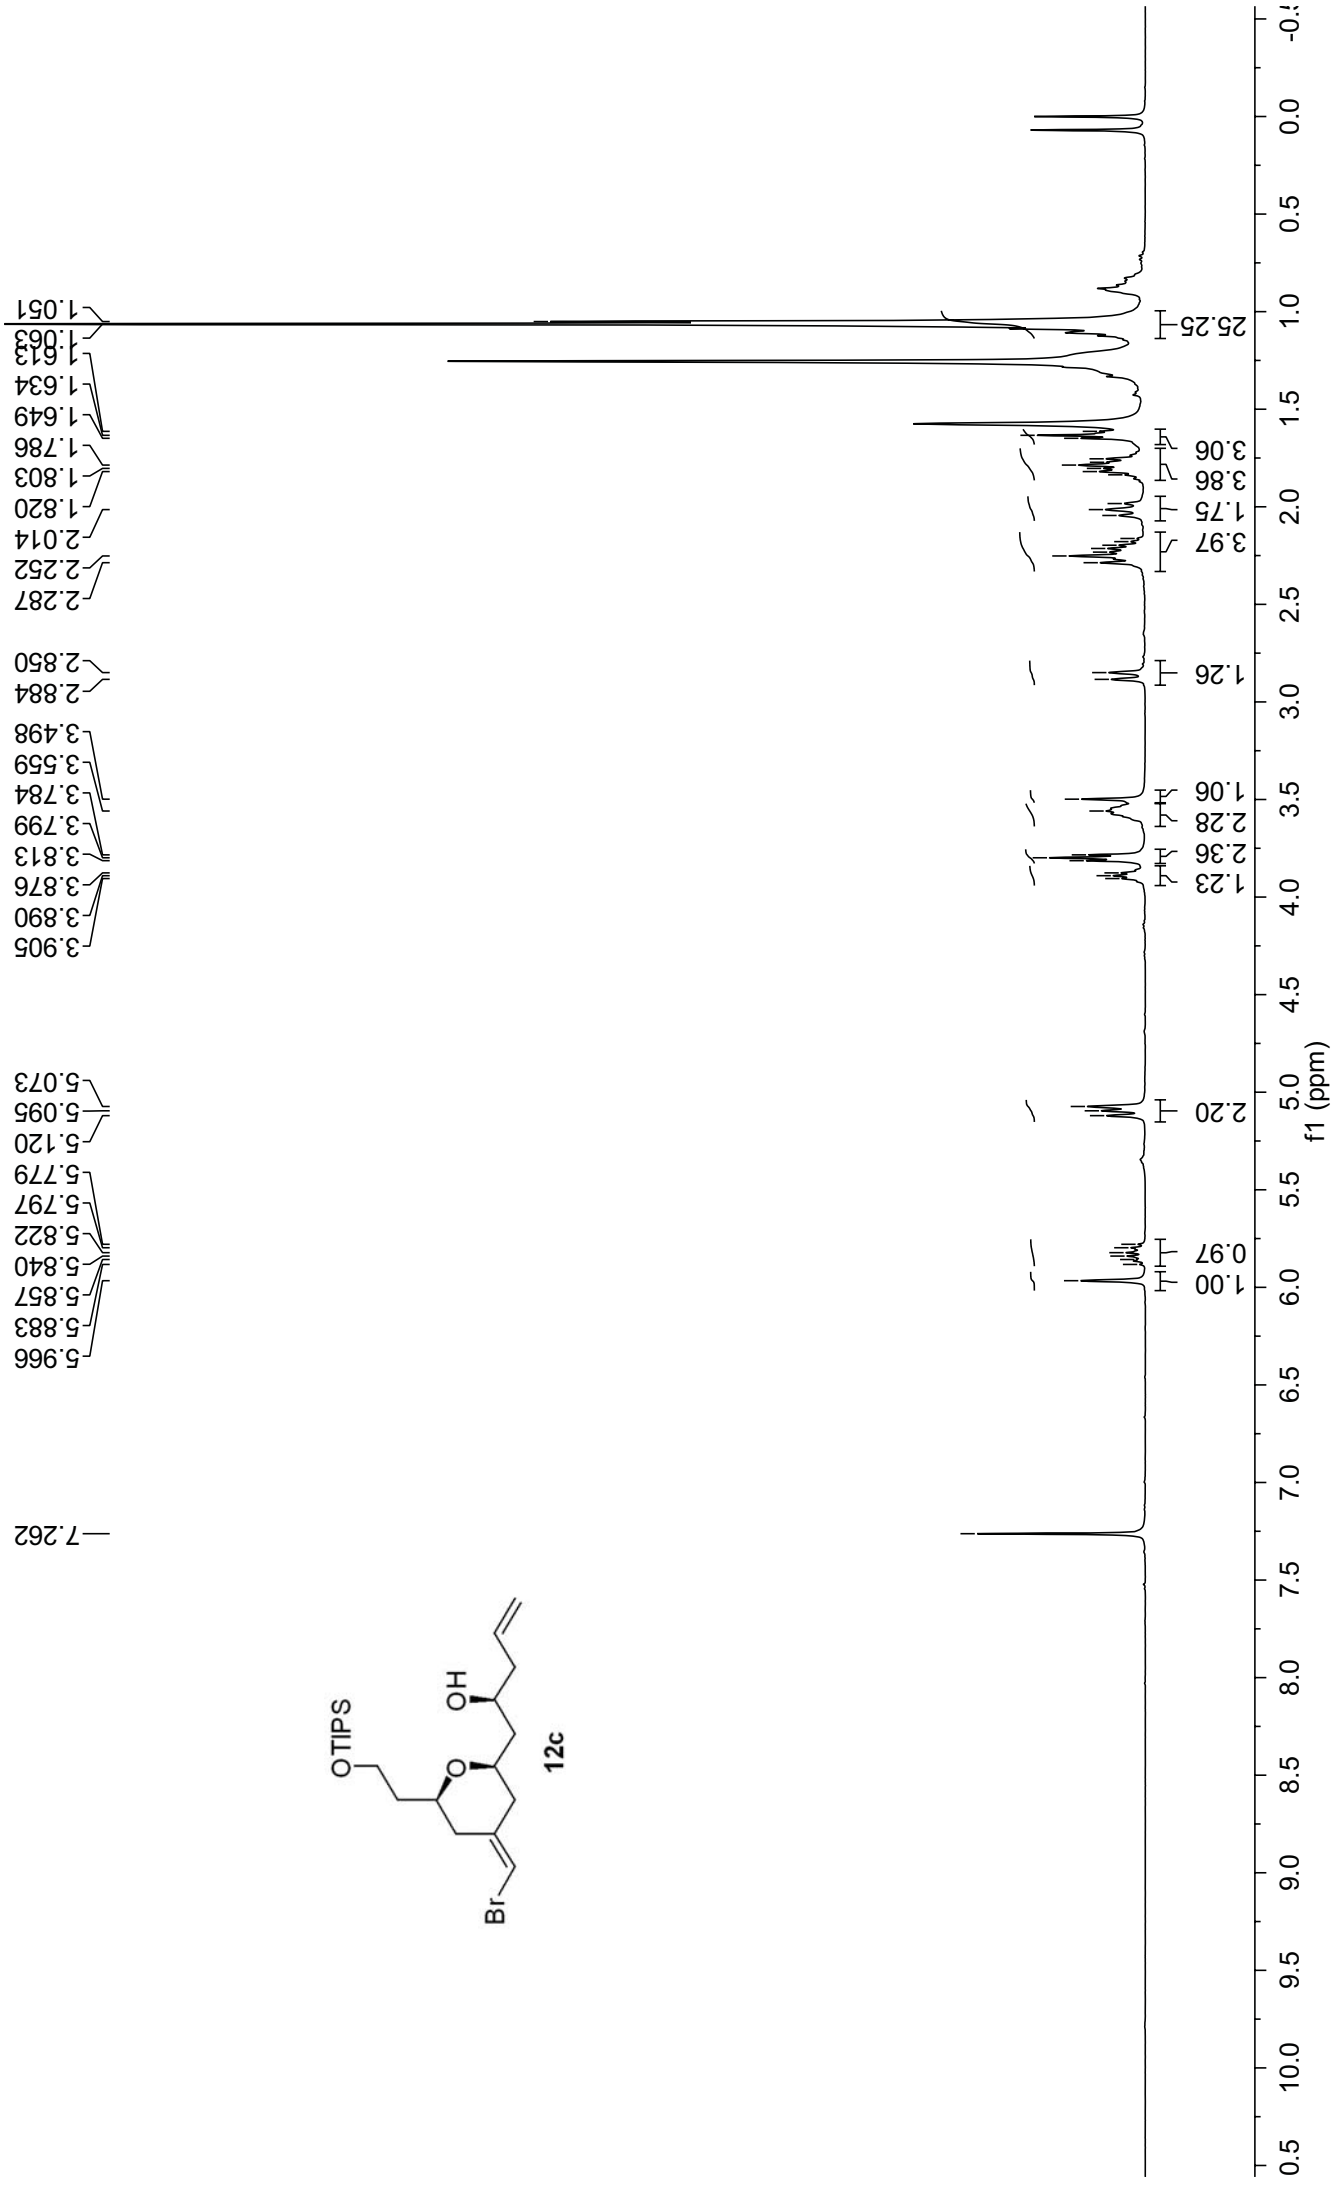

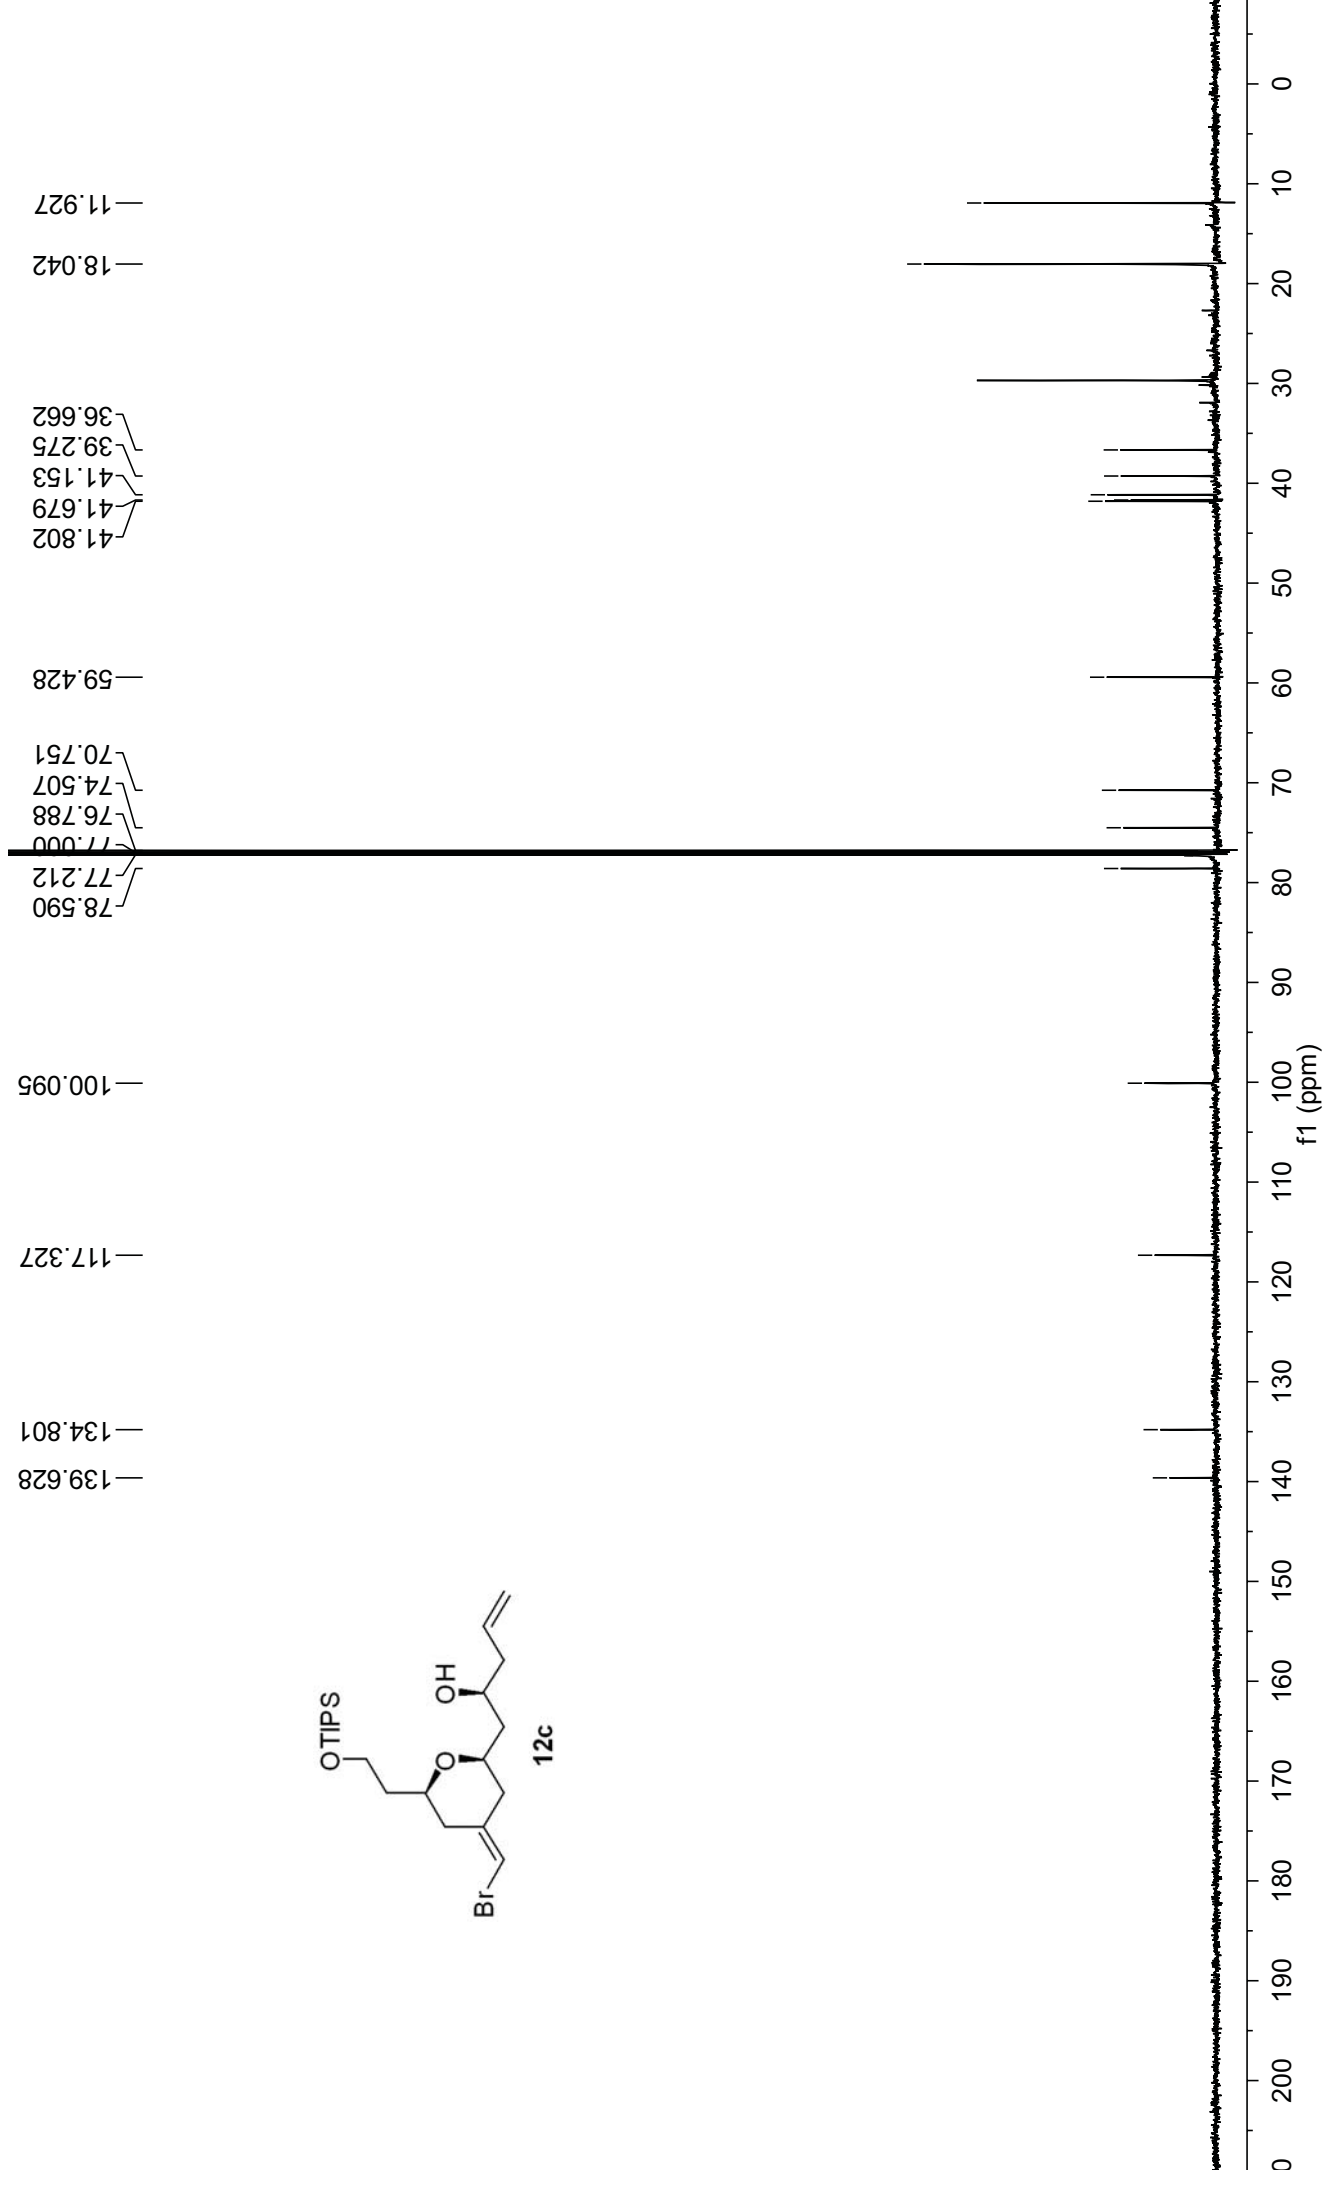

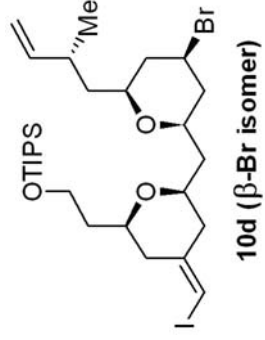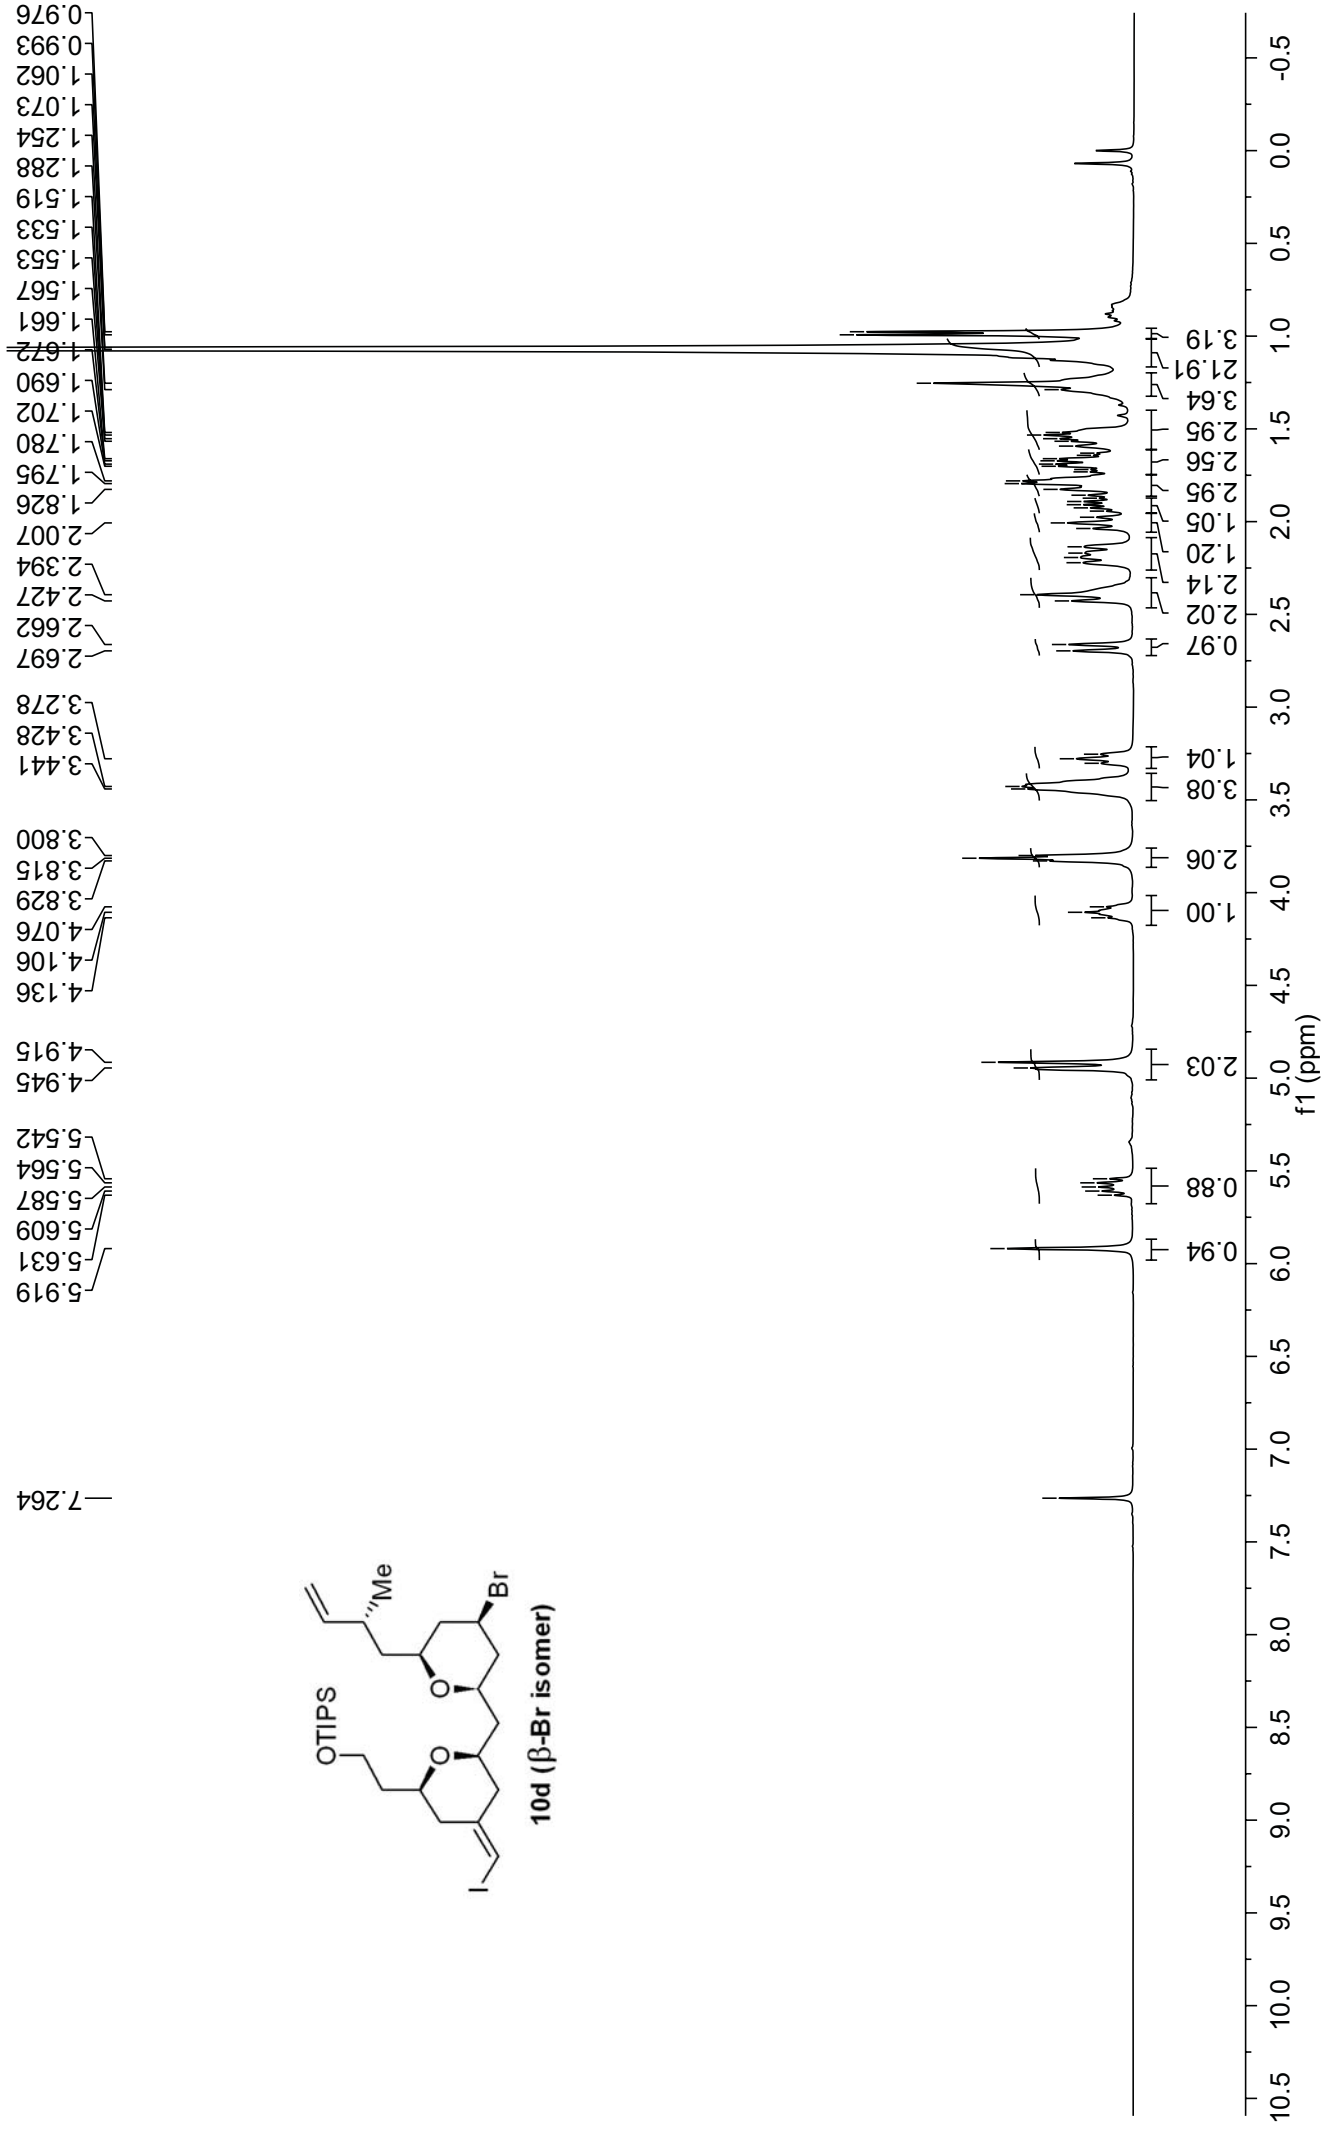

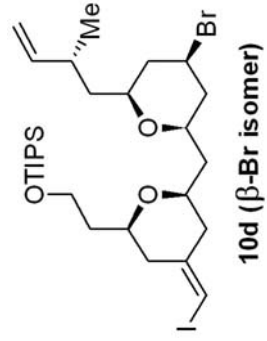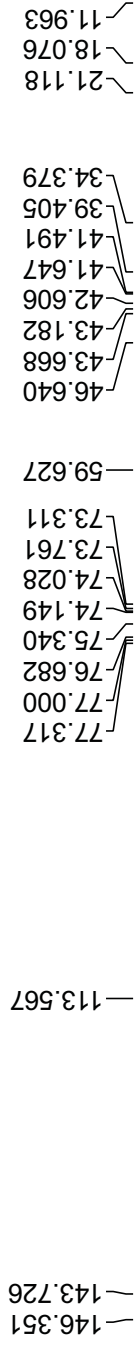

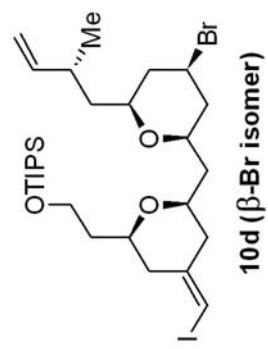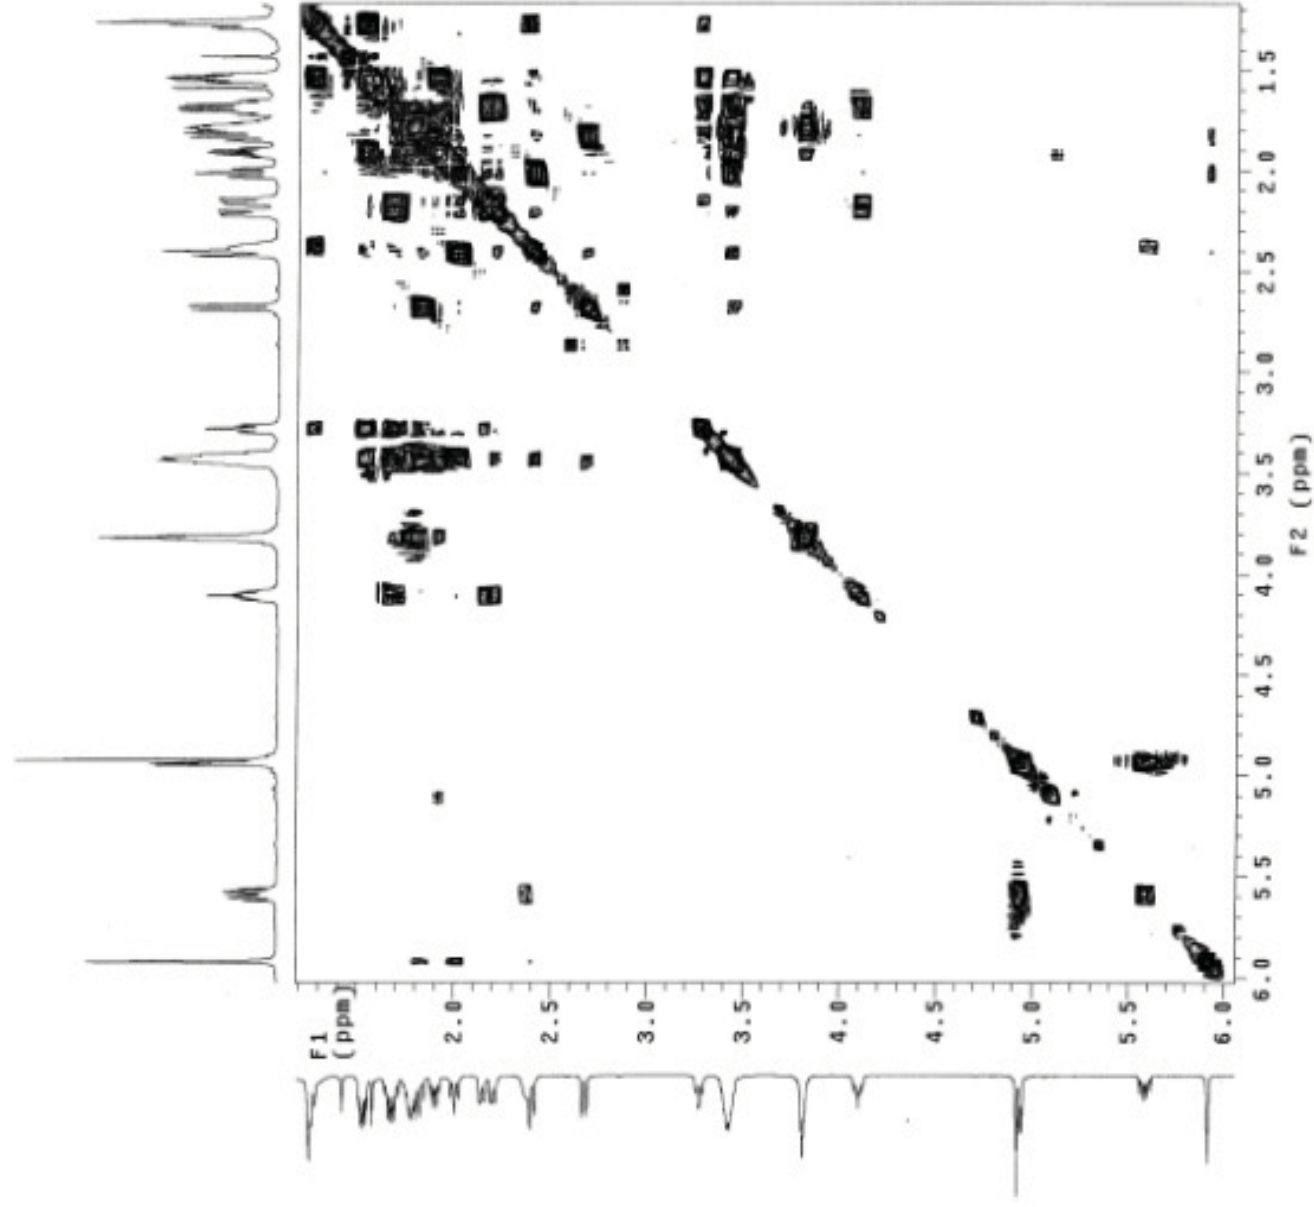

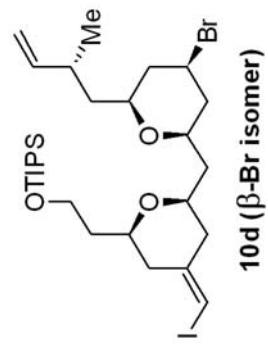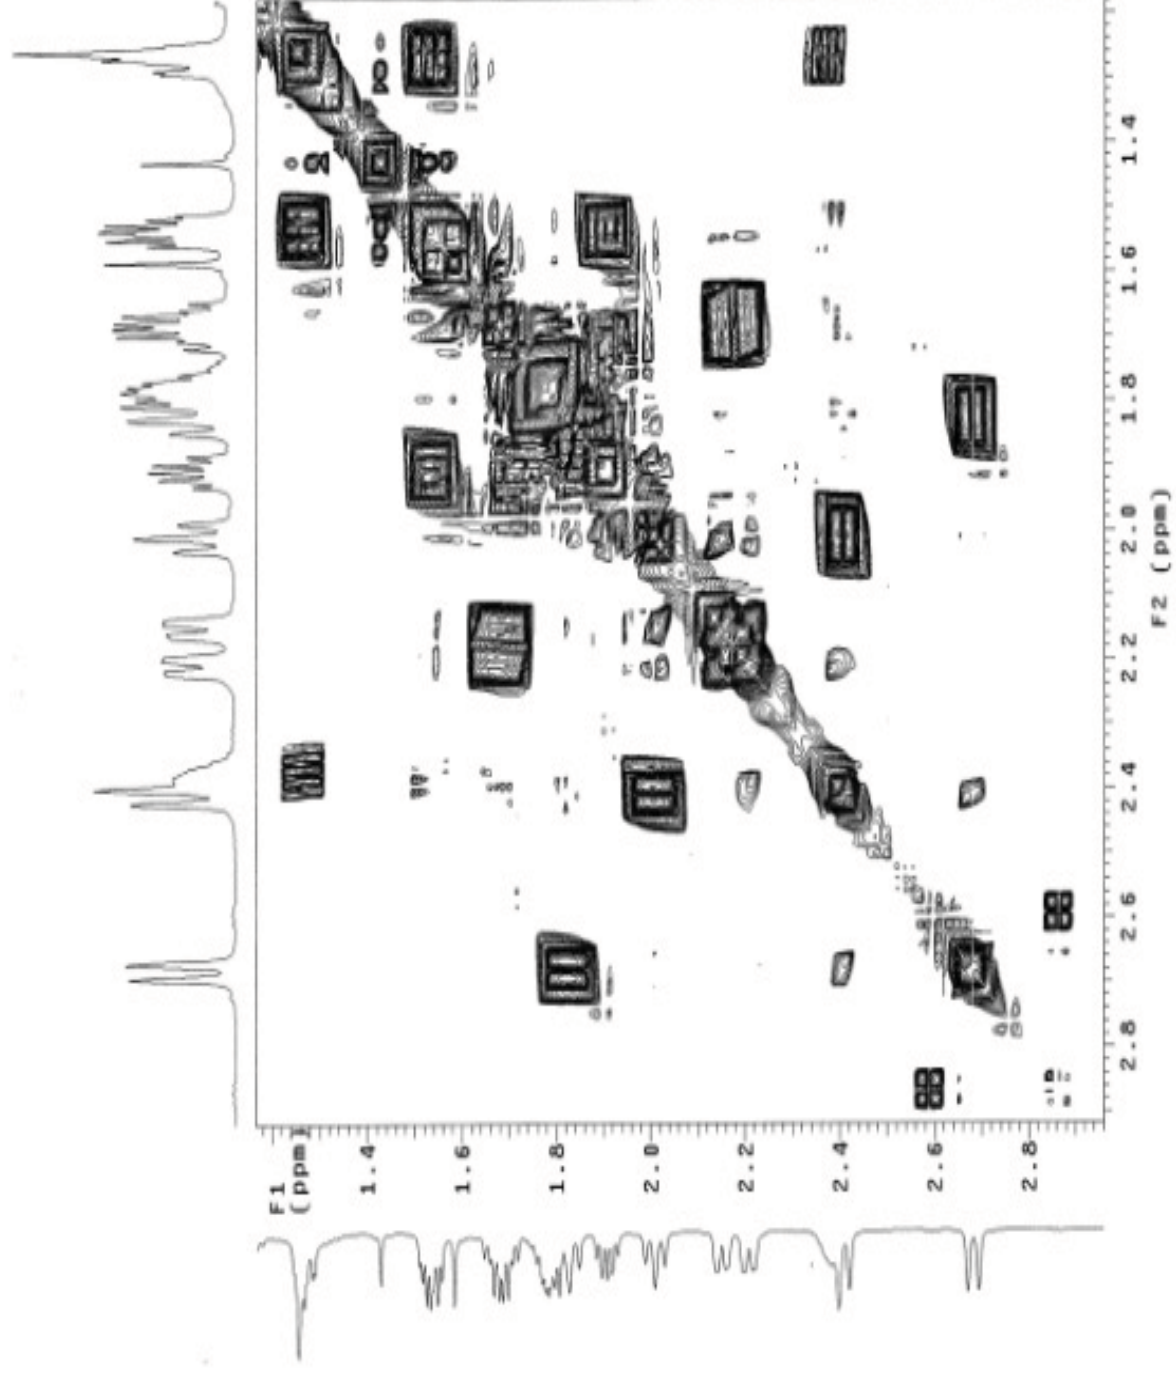

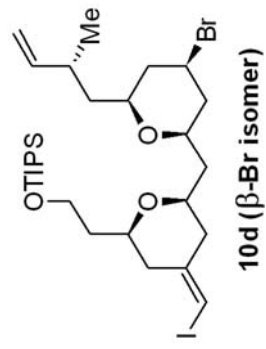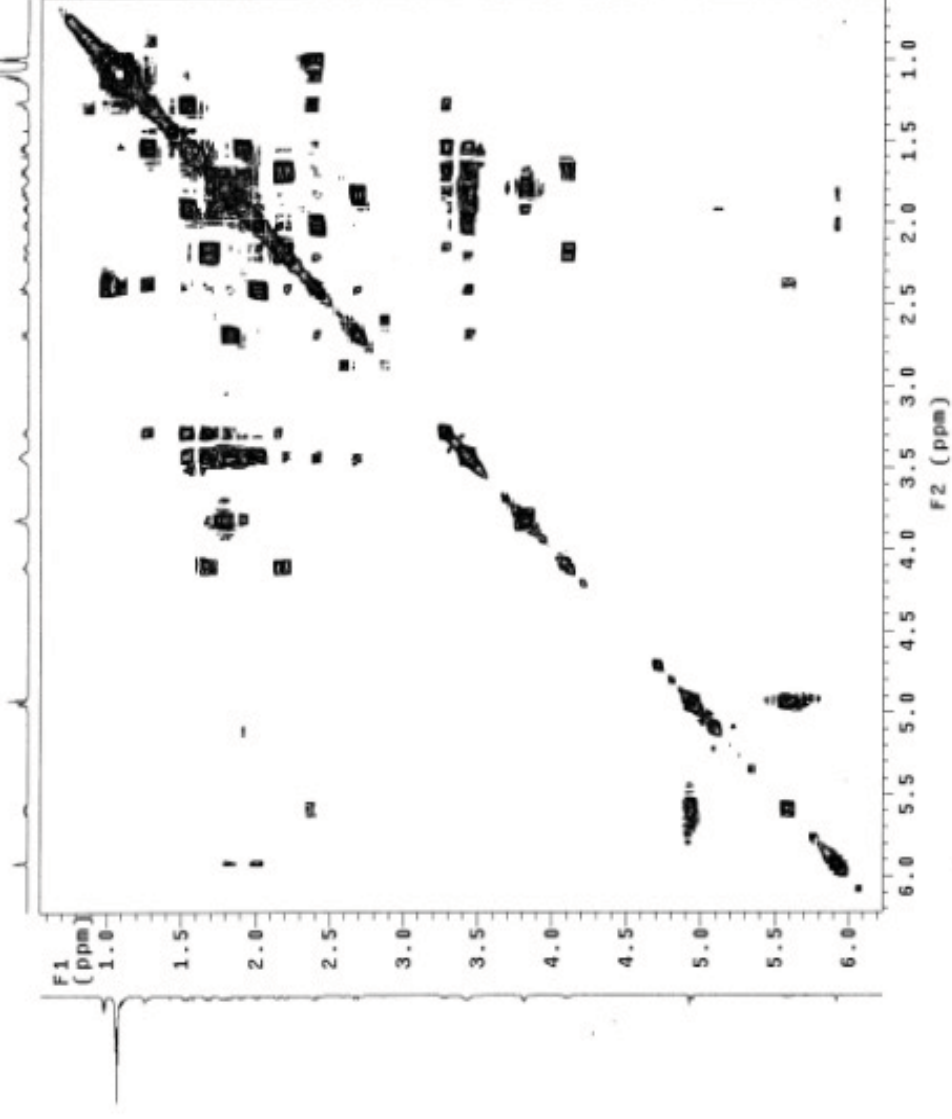

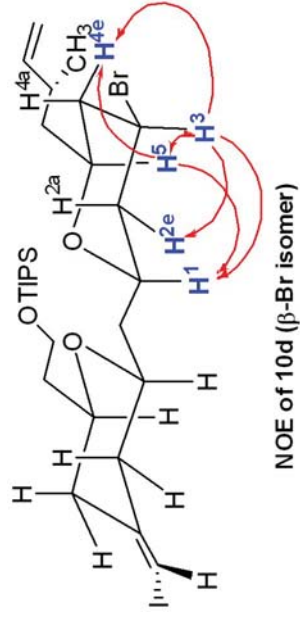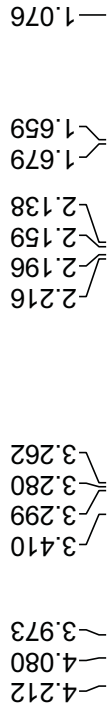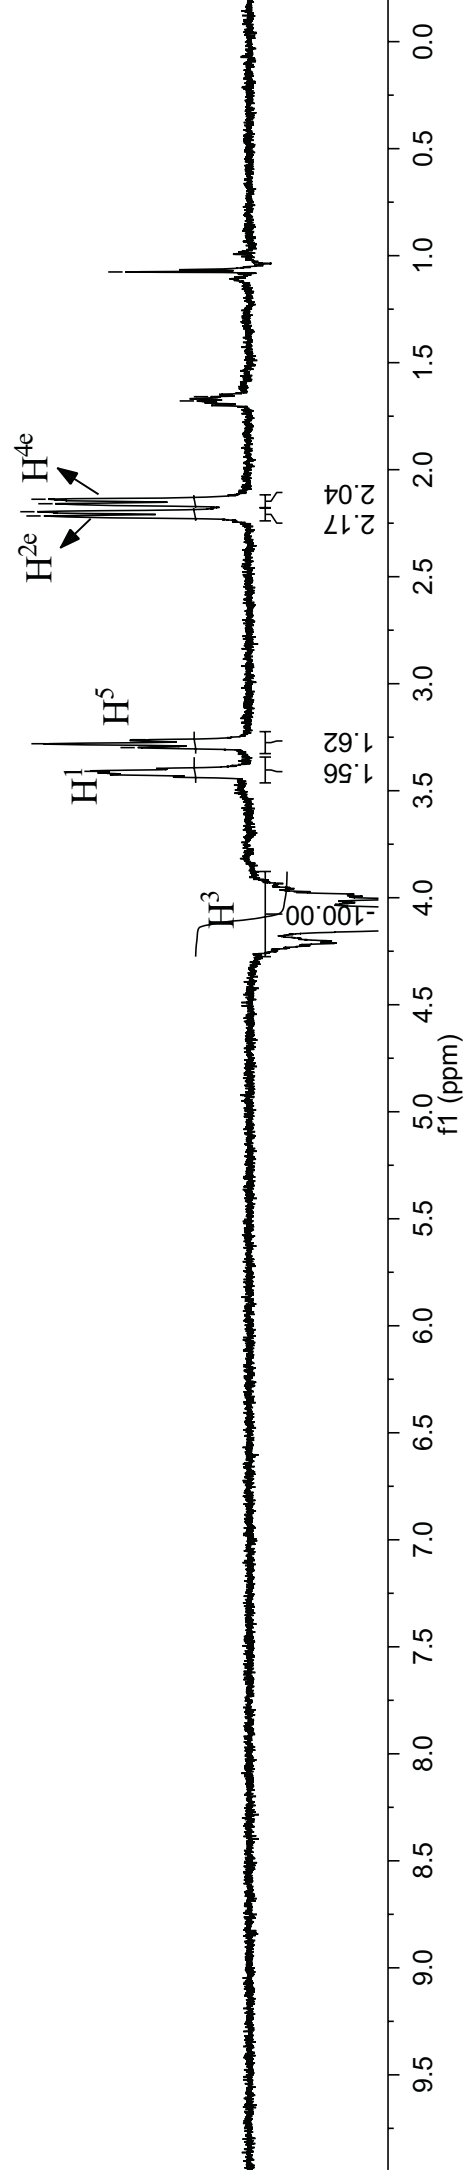

4.126  
4.111  
4.091

3.419  
3.293  
3.276

2.171  
2.154

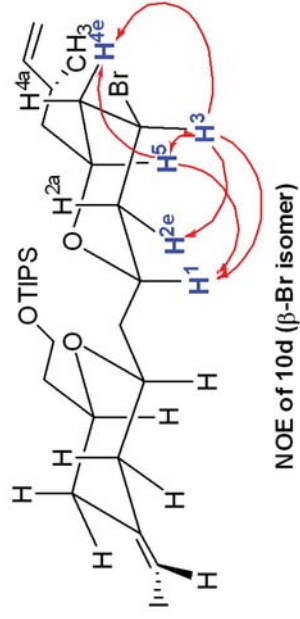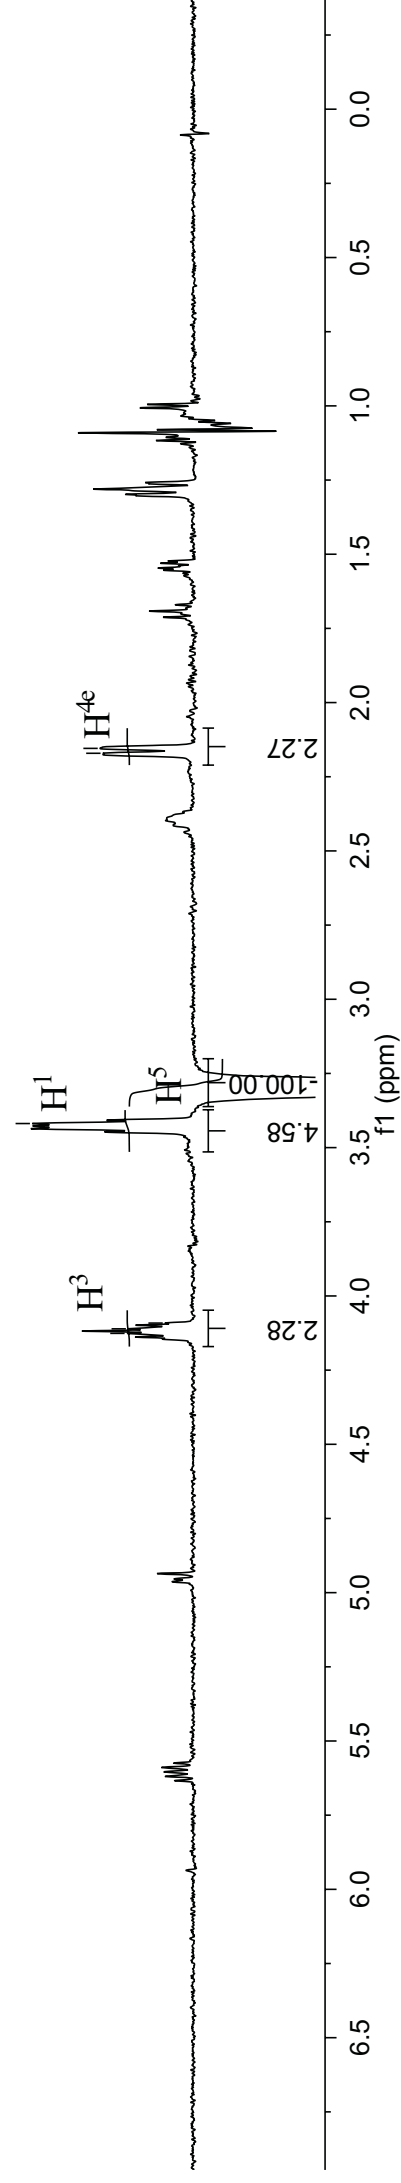

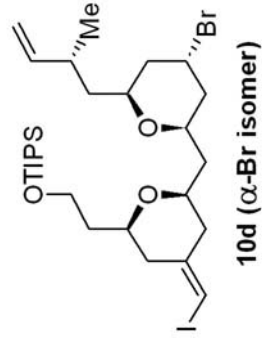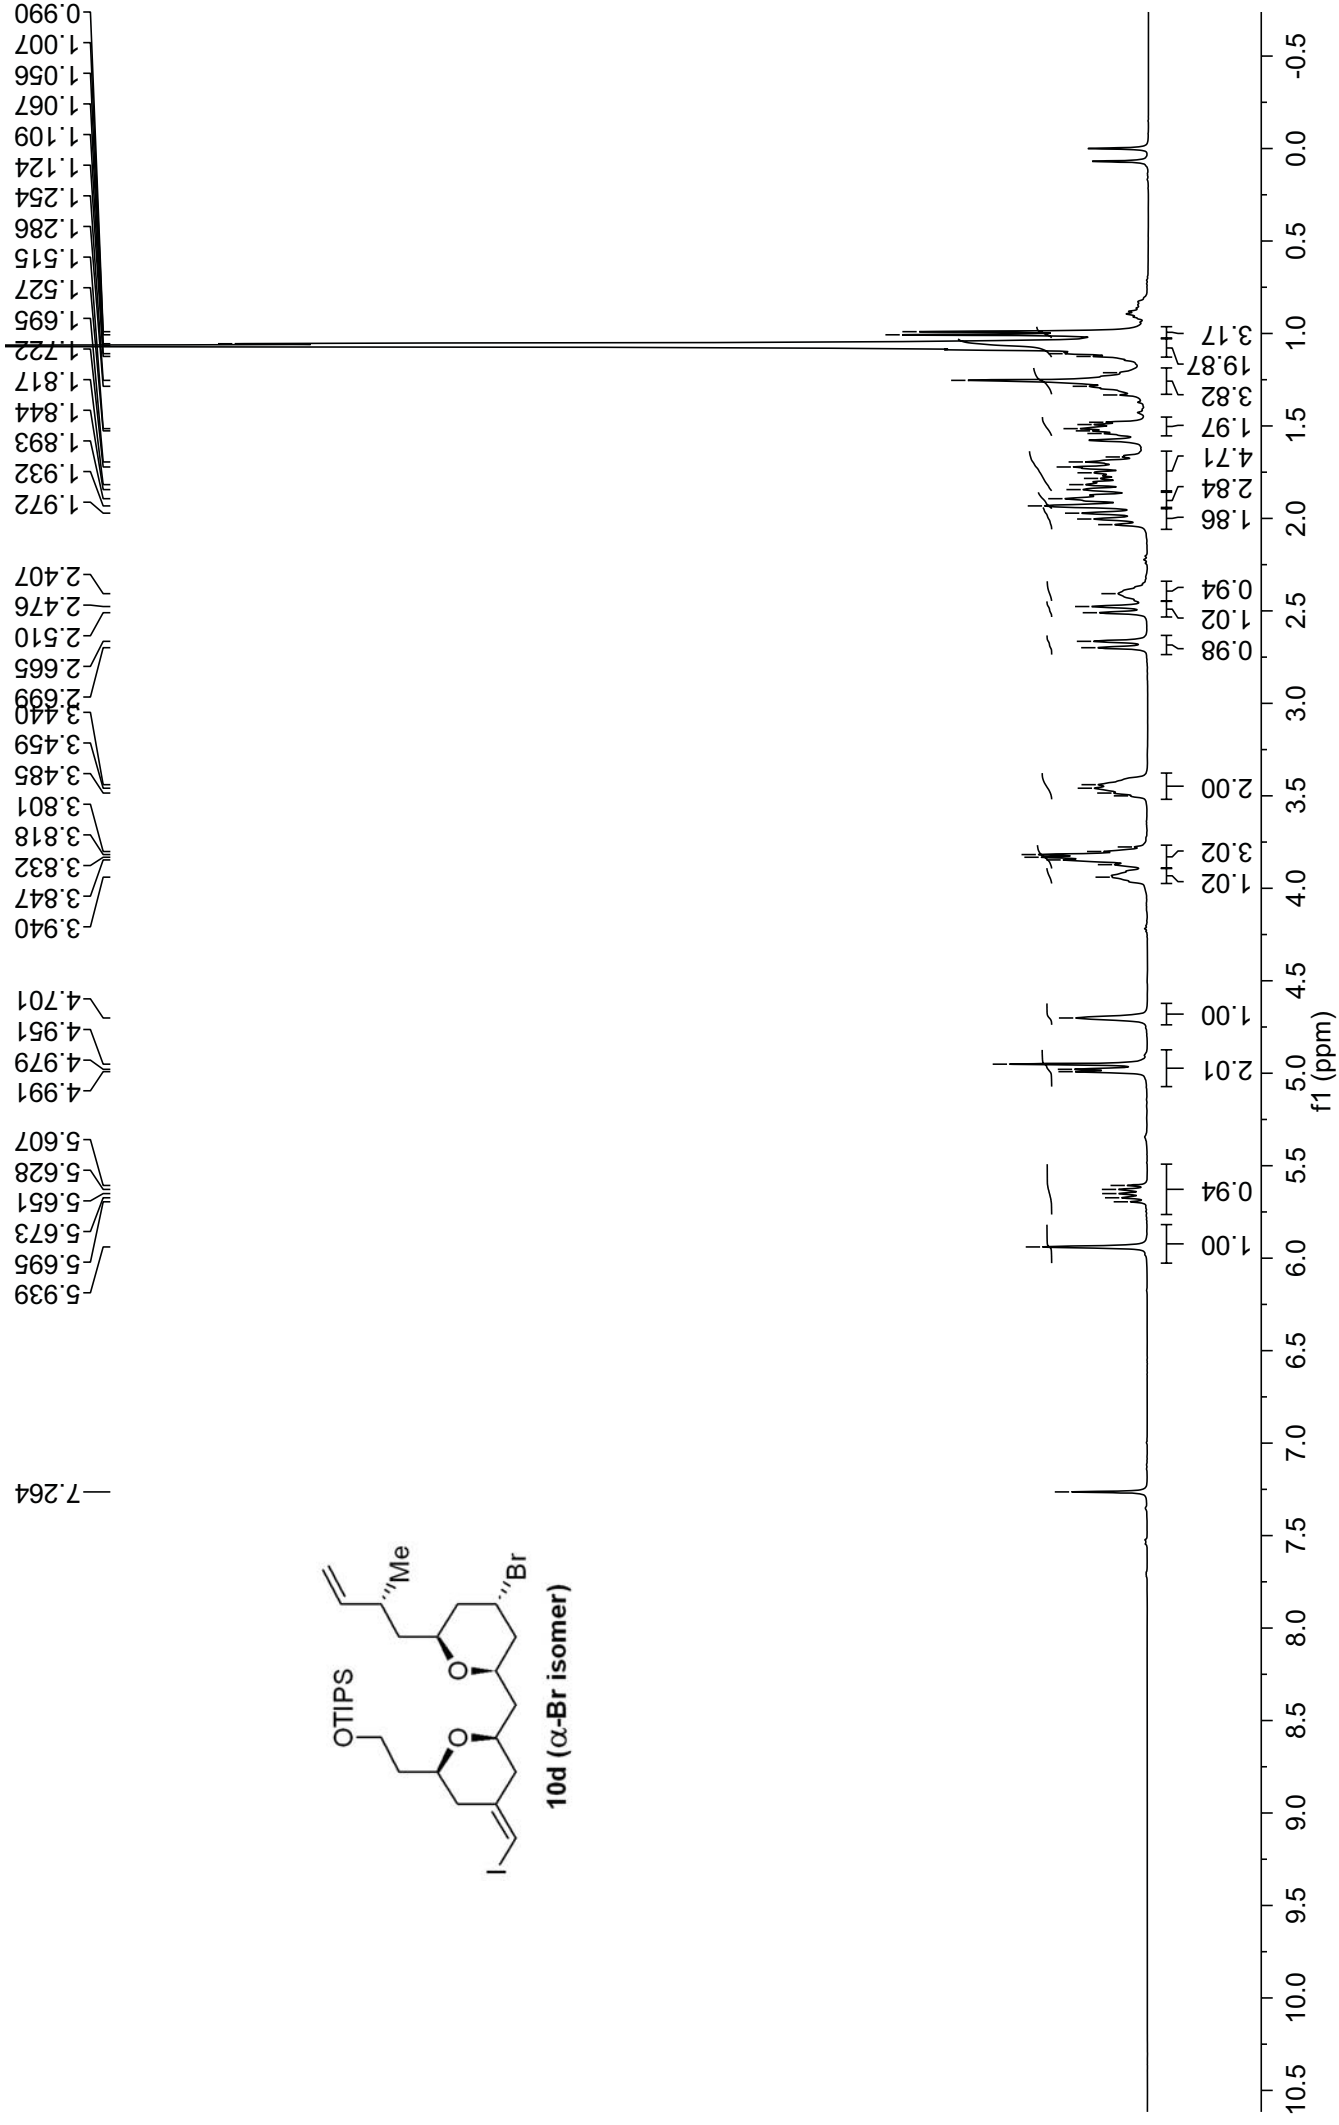

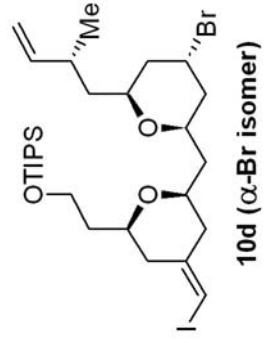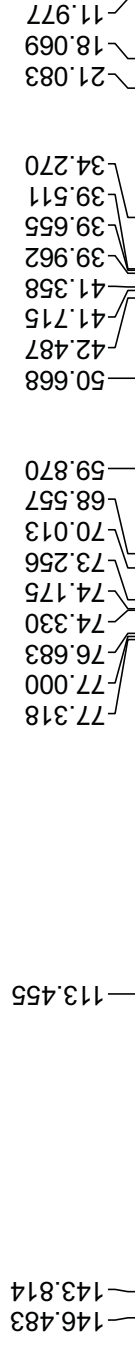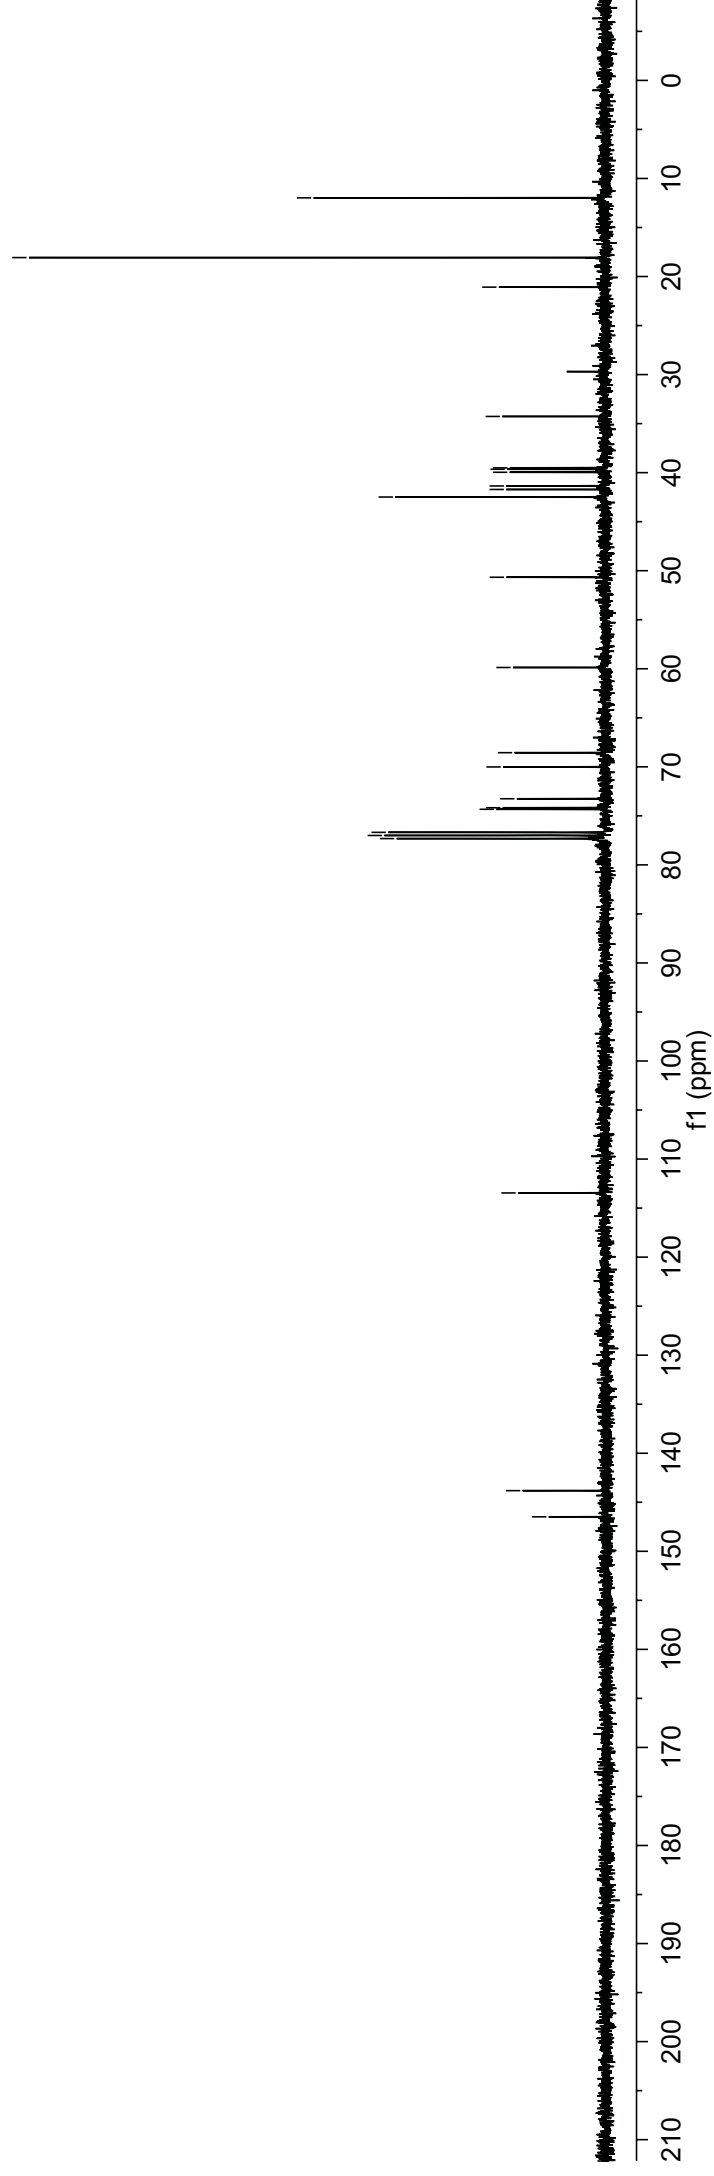

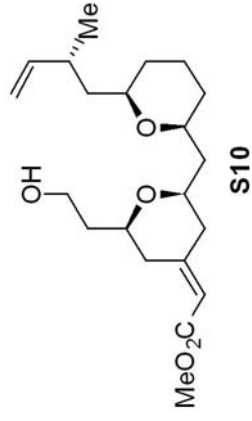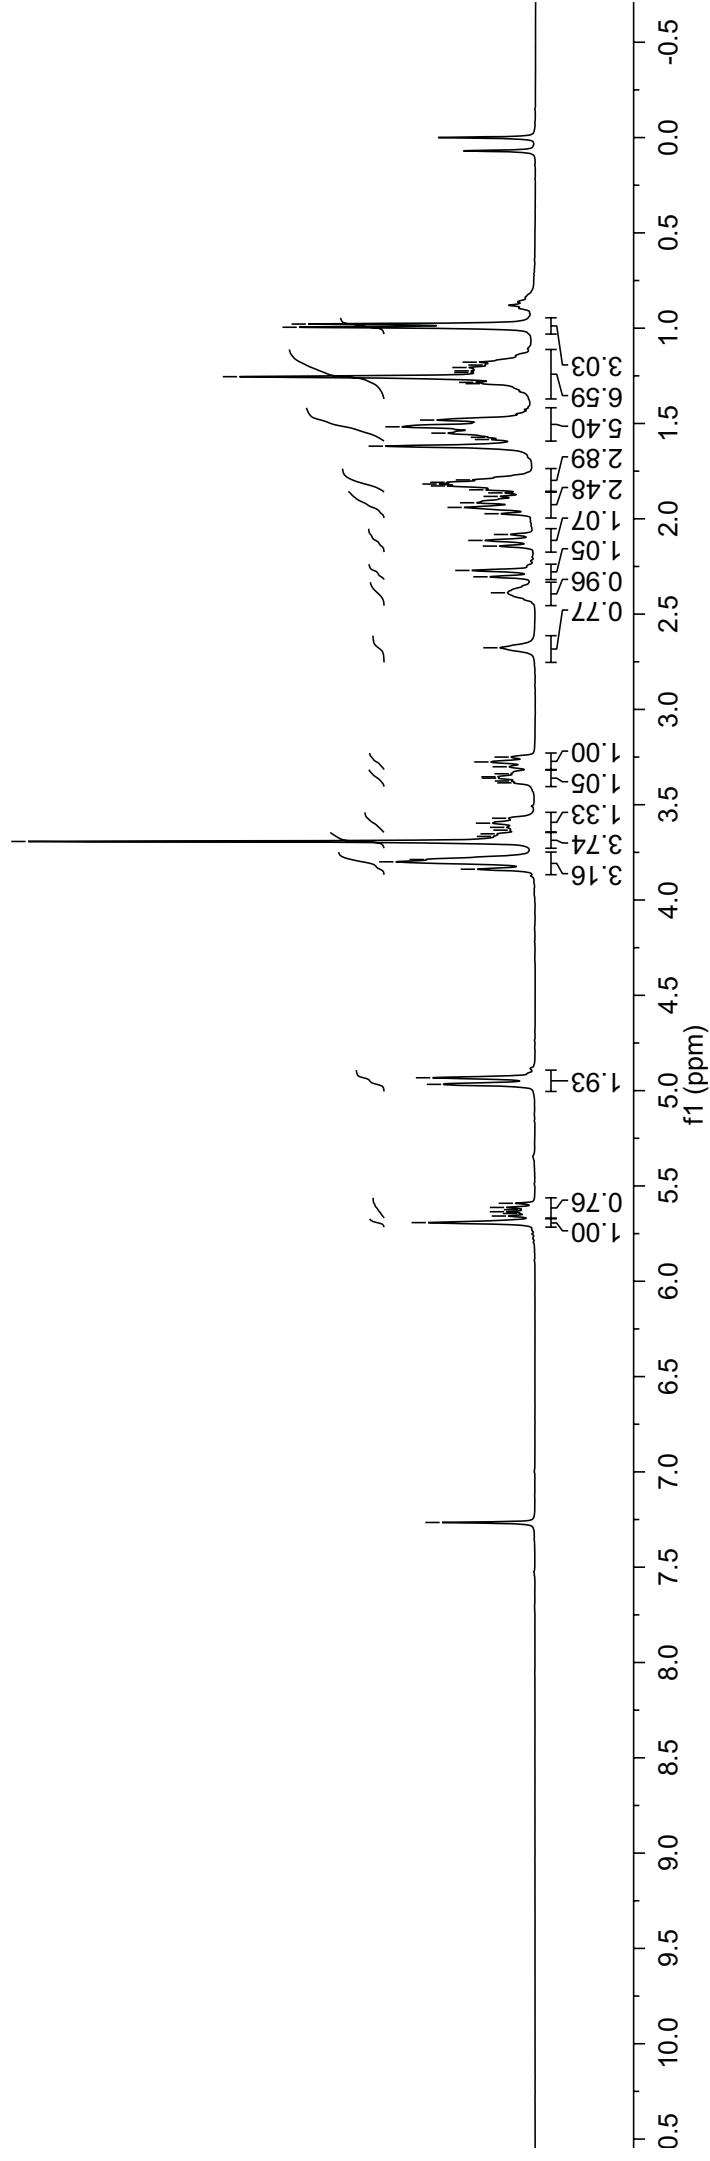

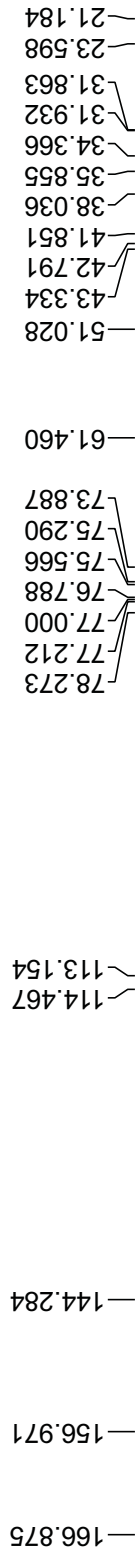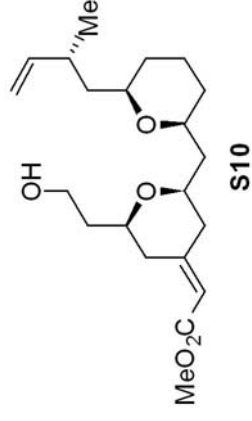

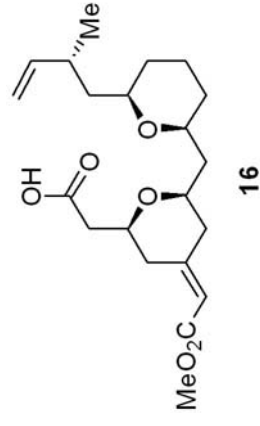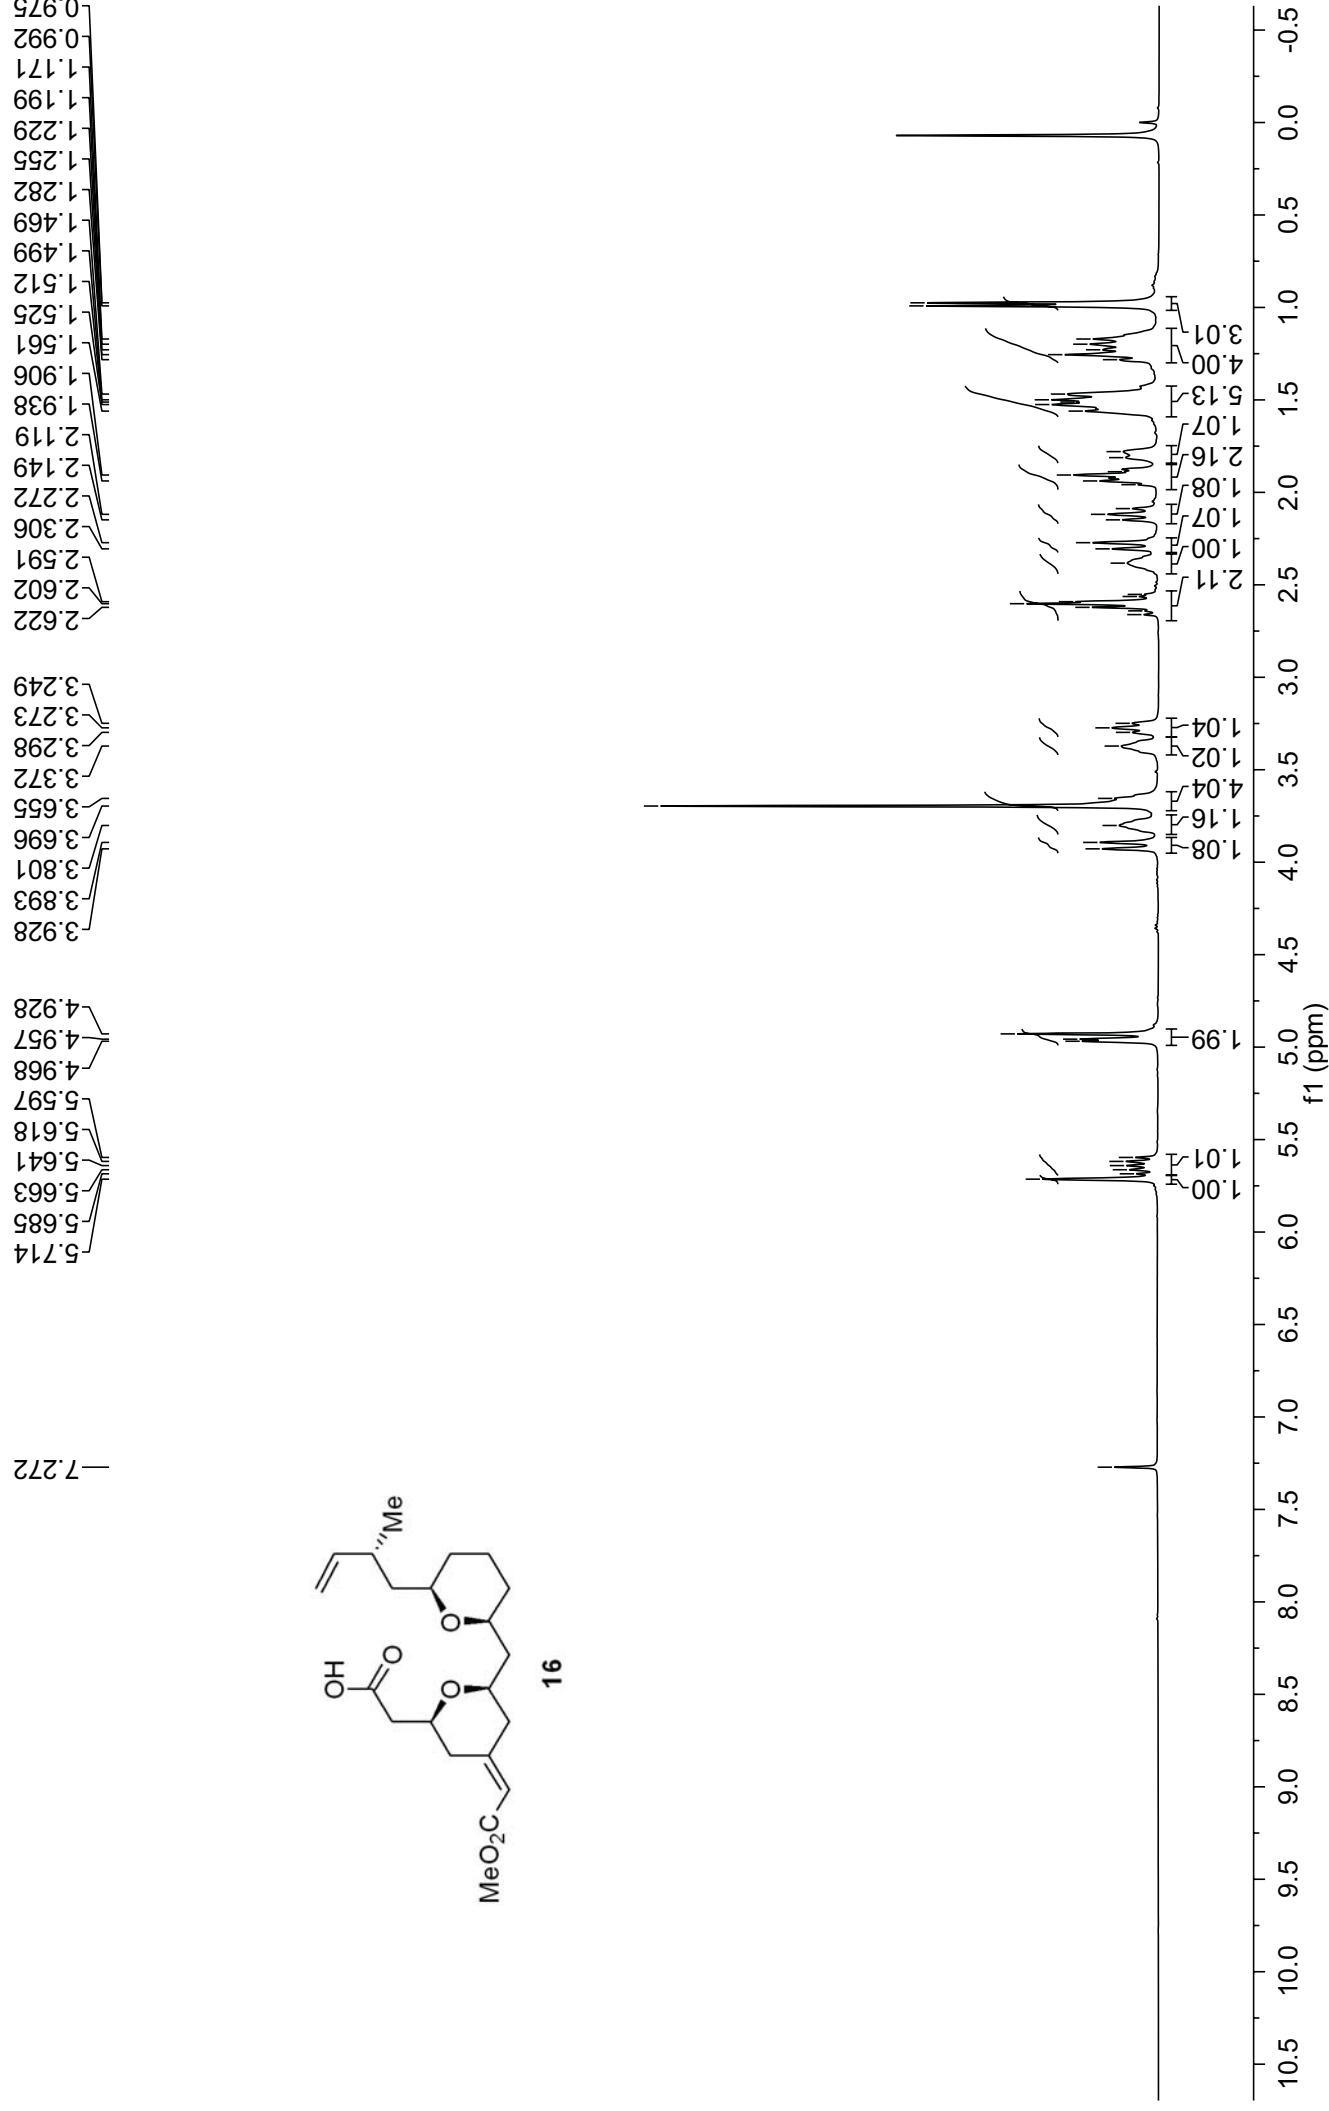

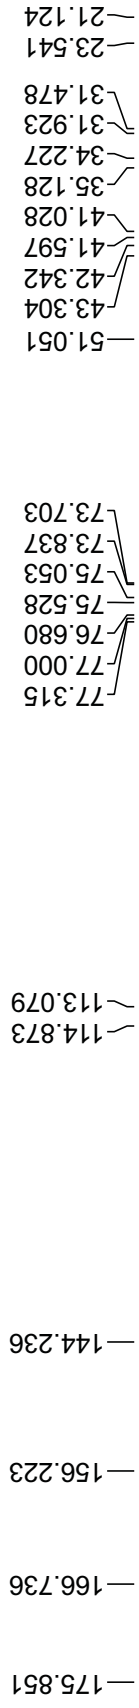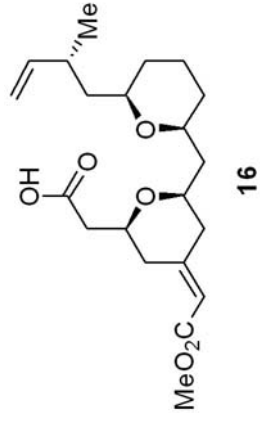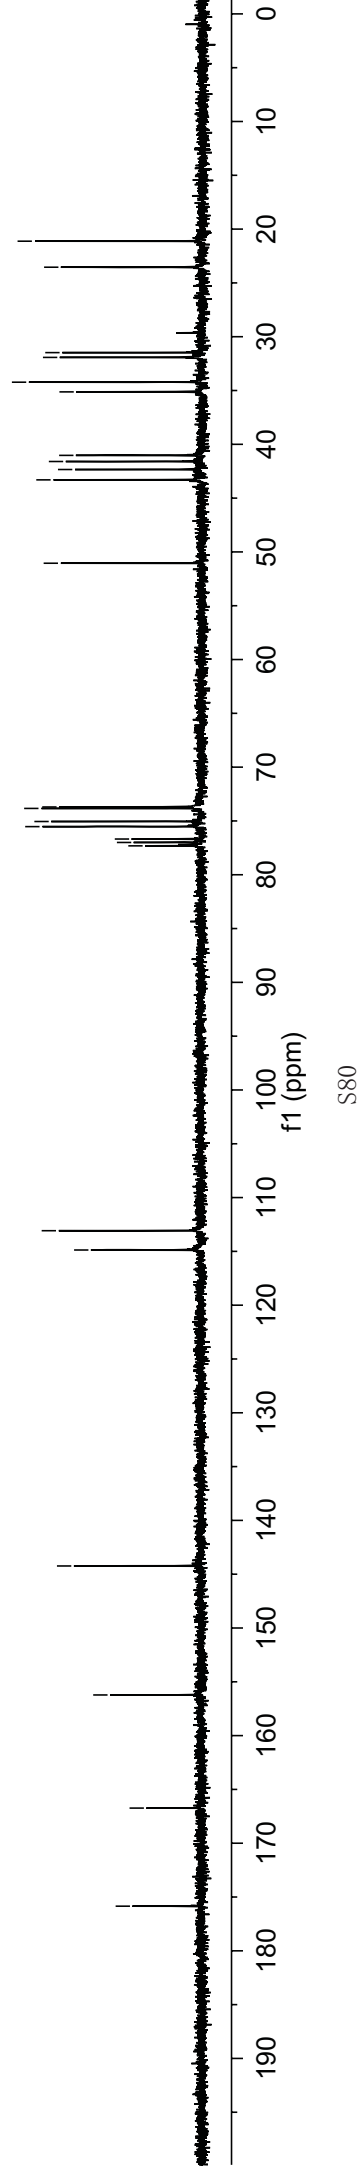

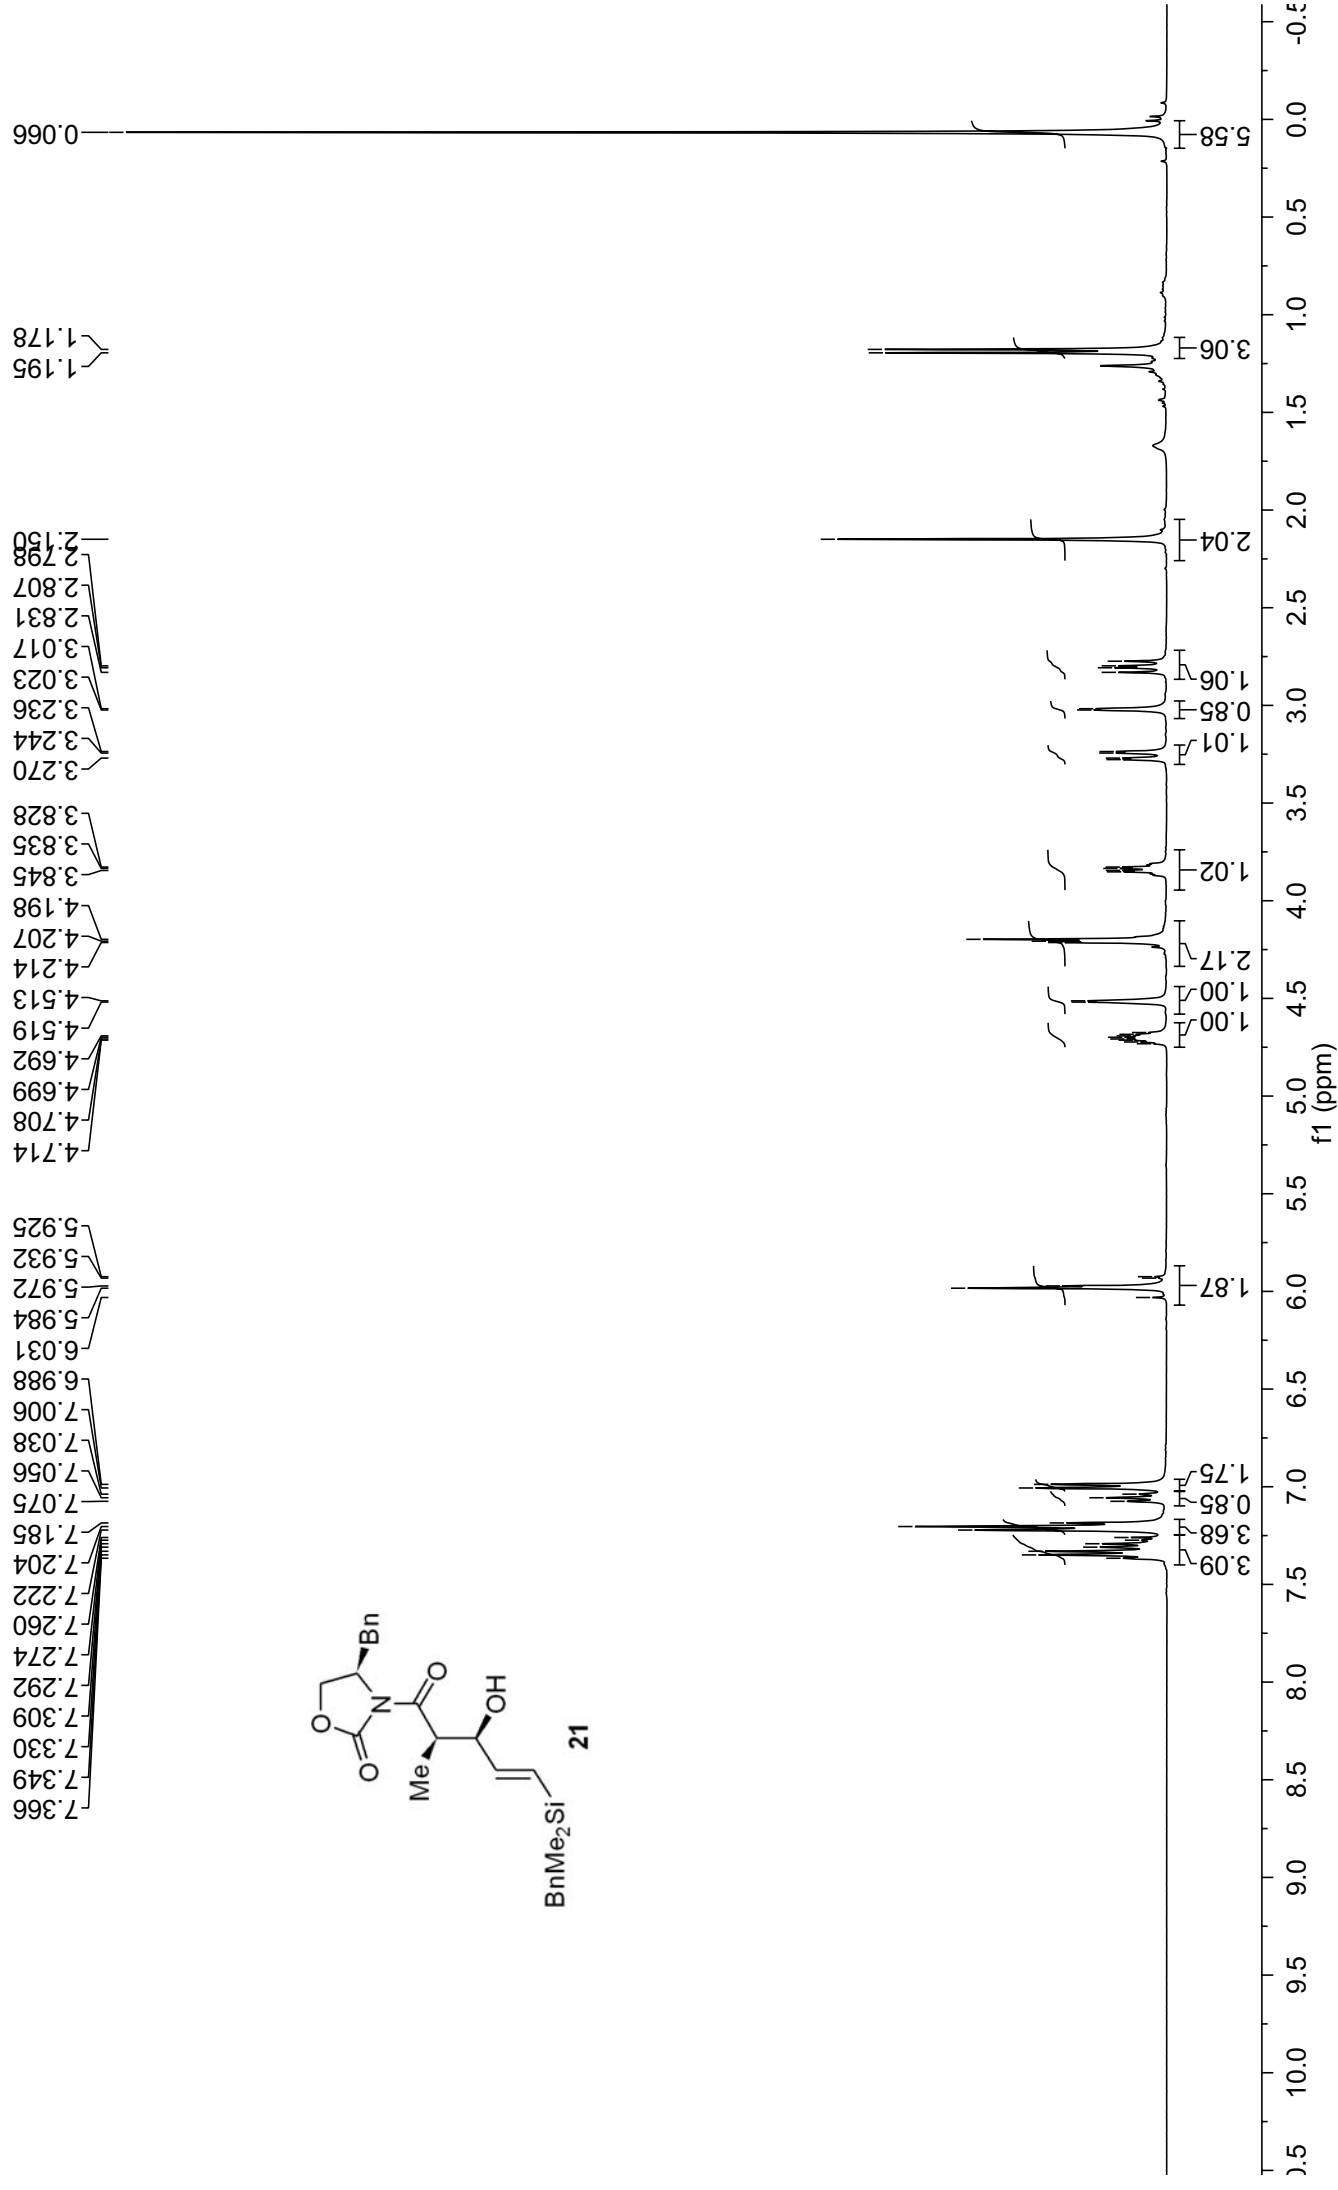

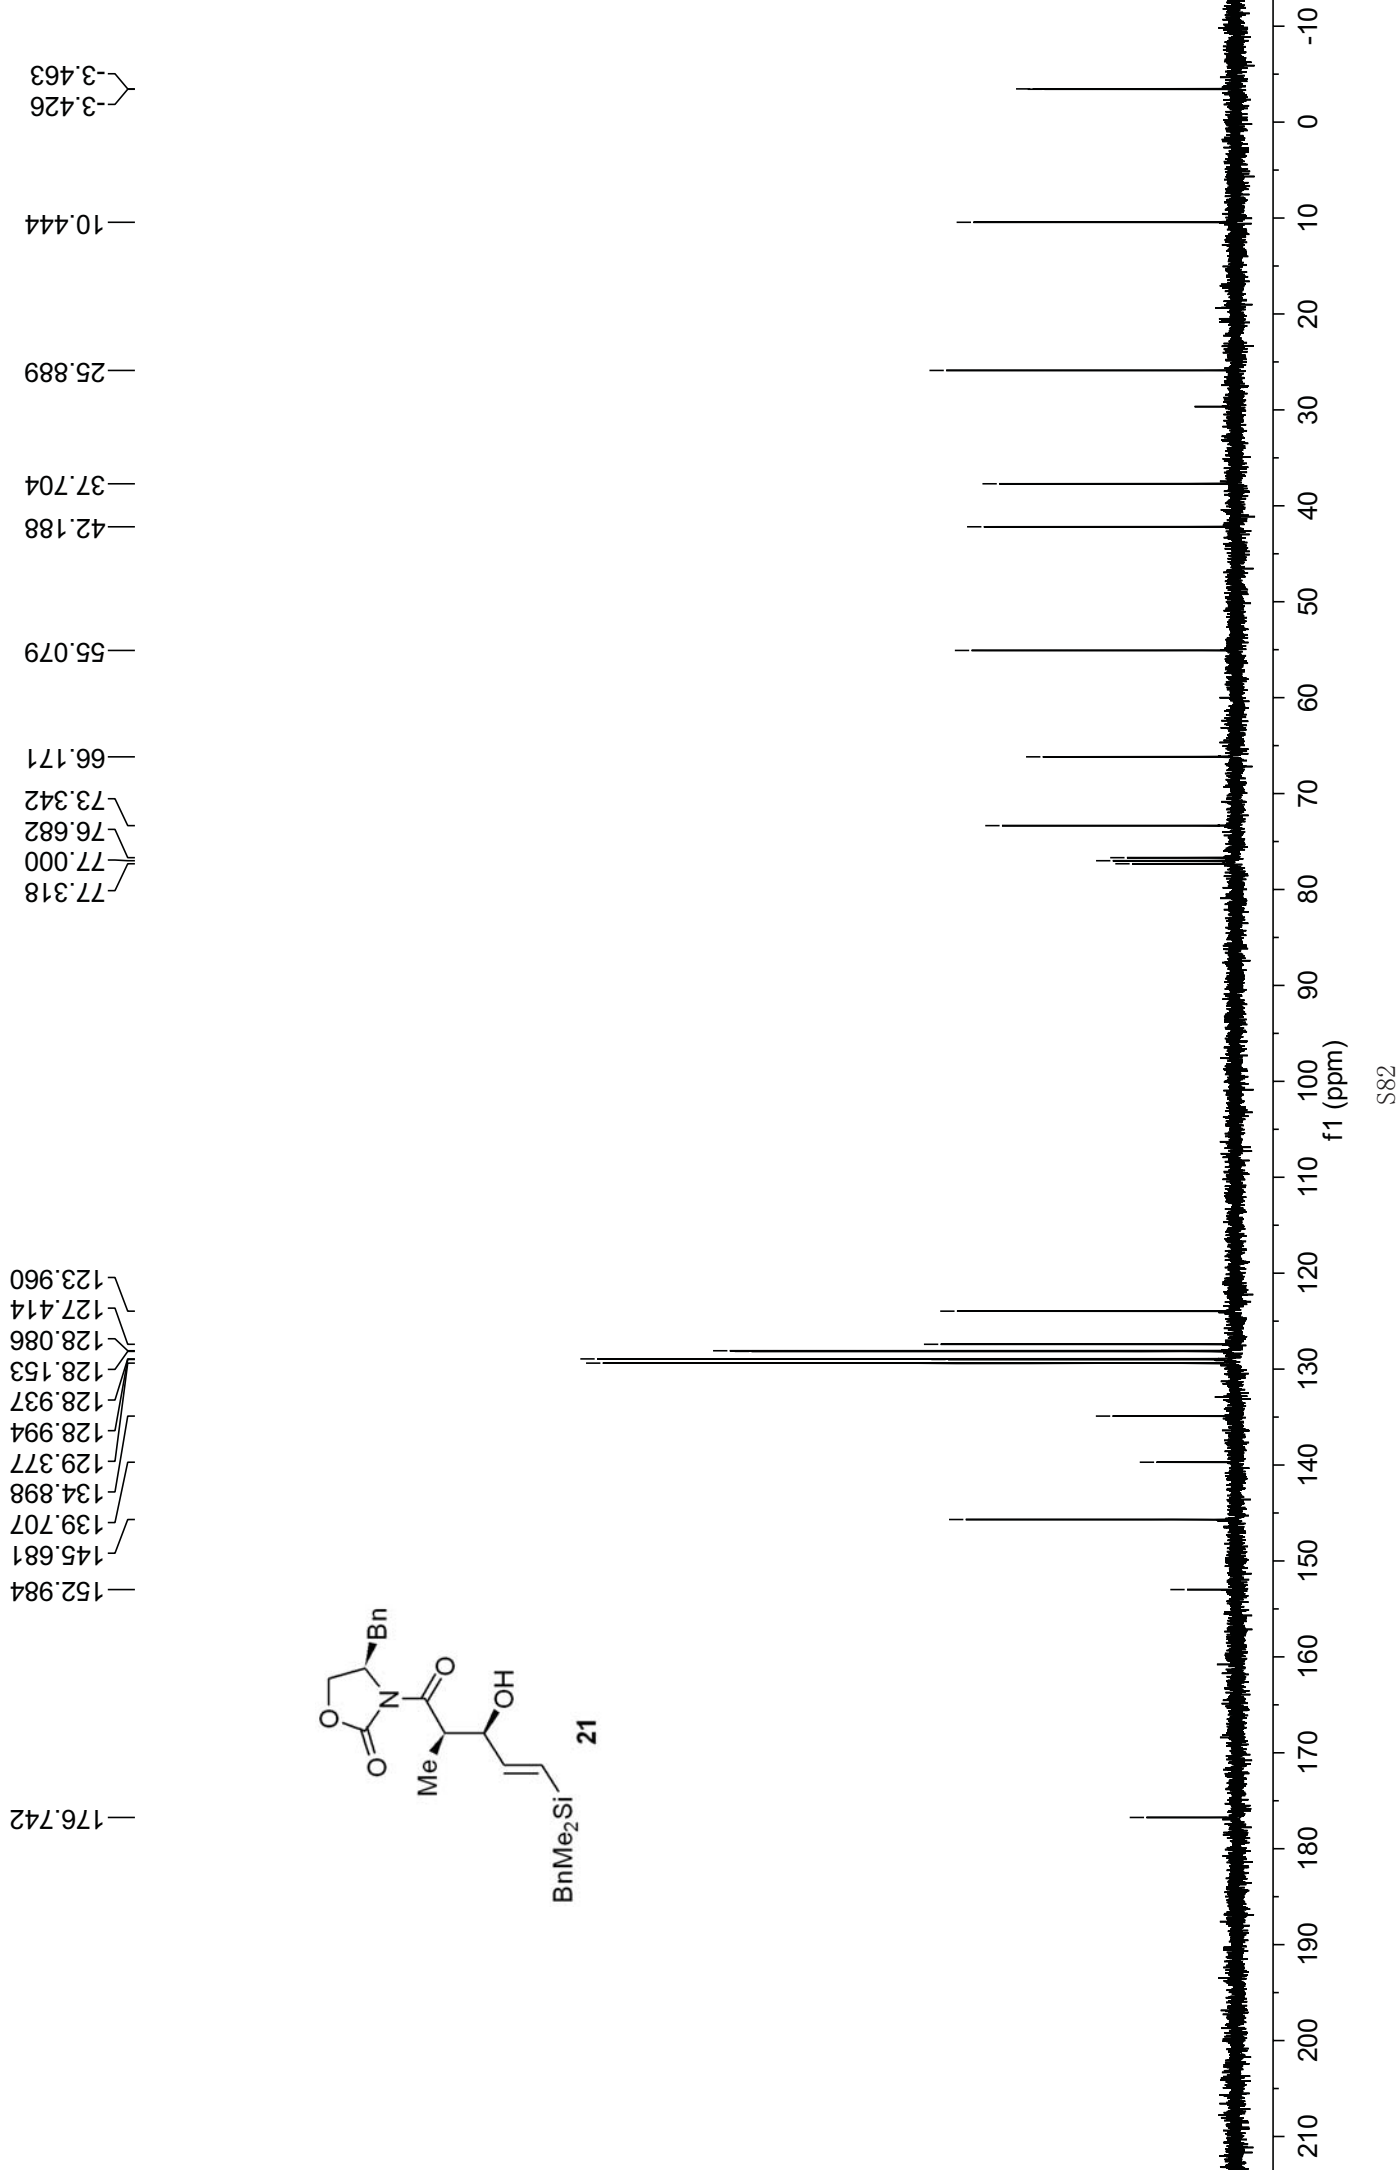

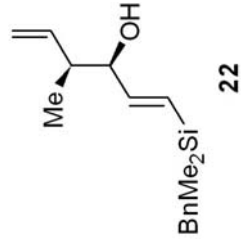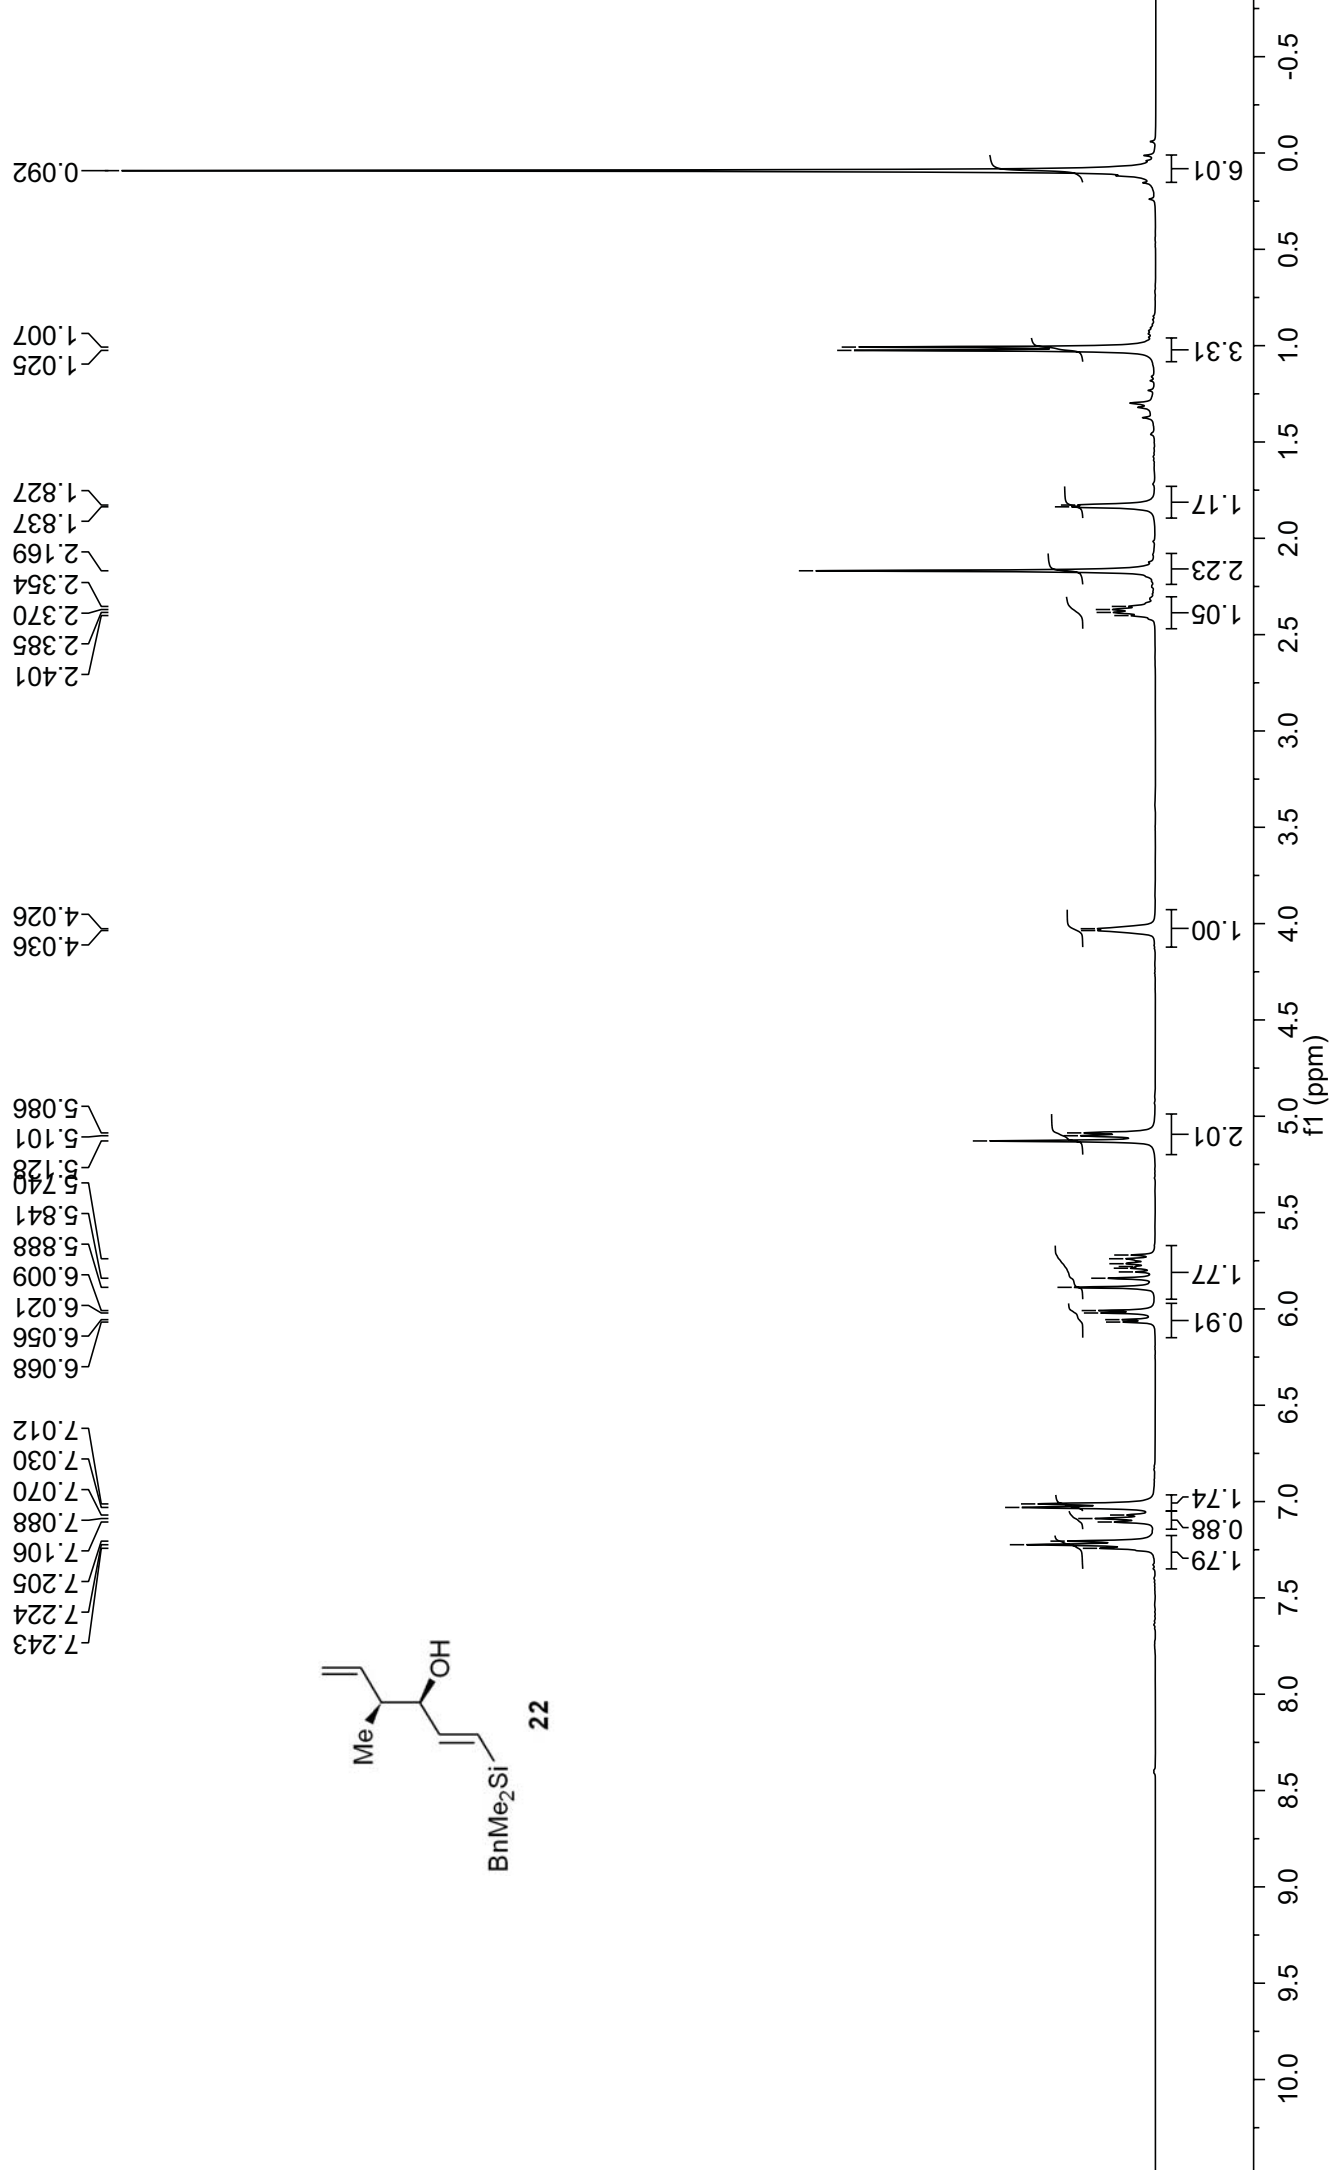

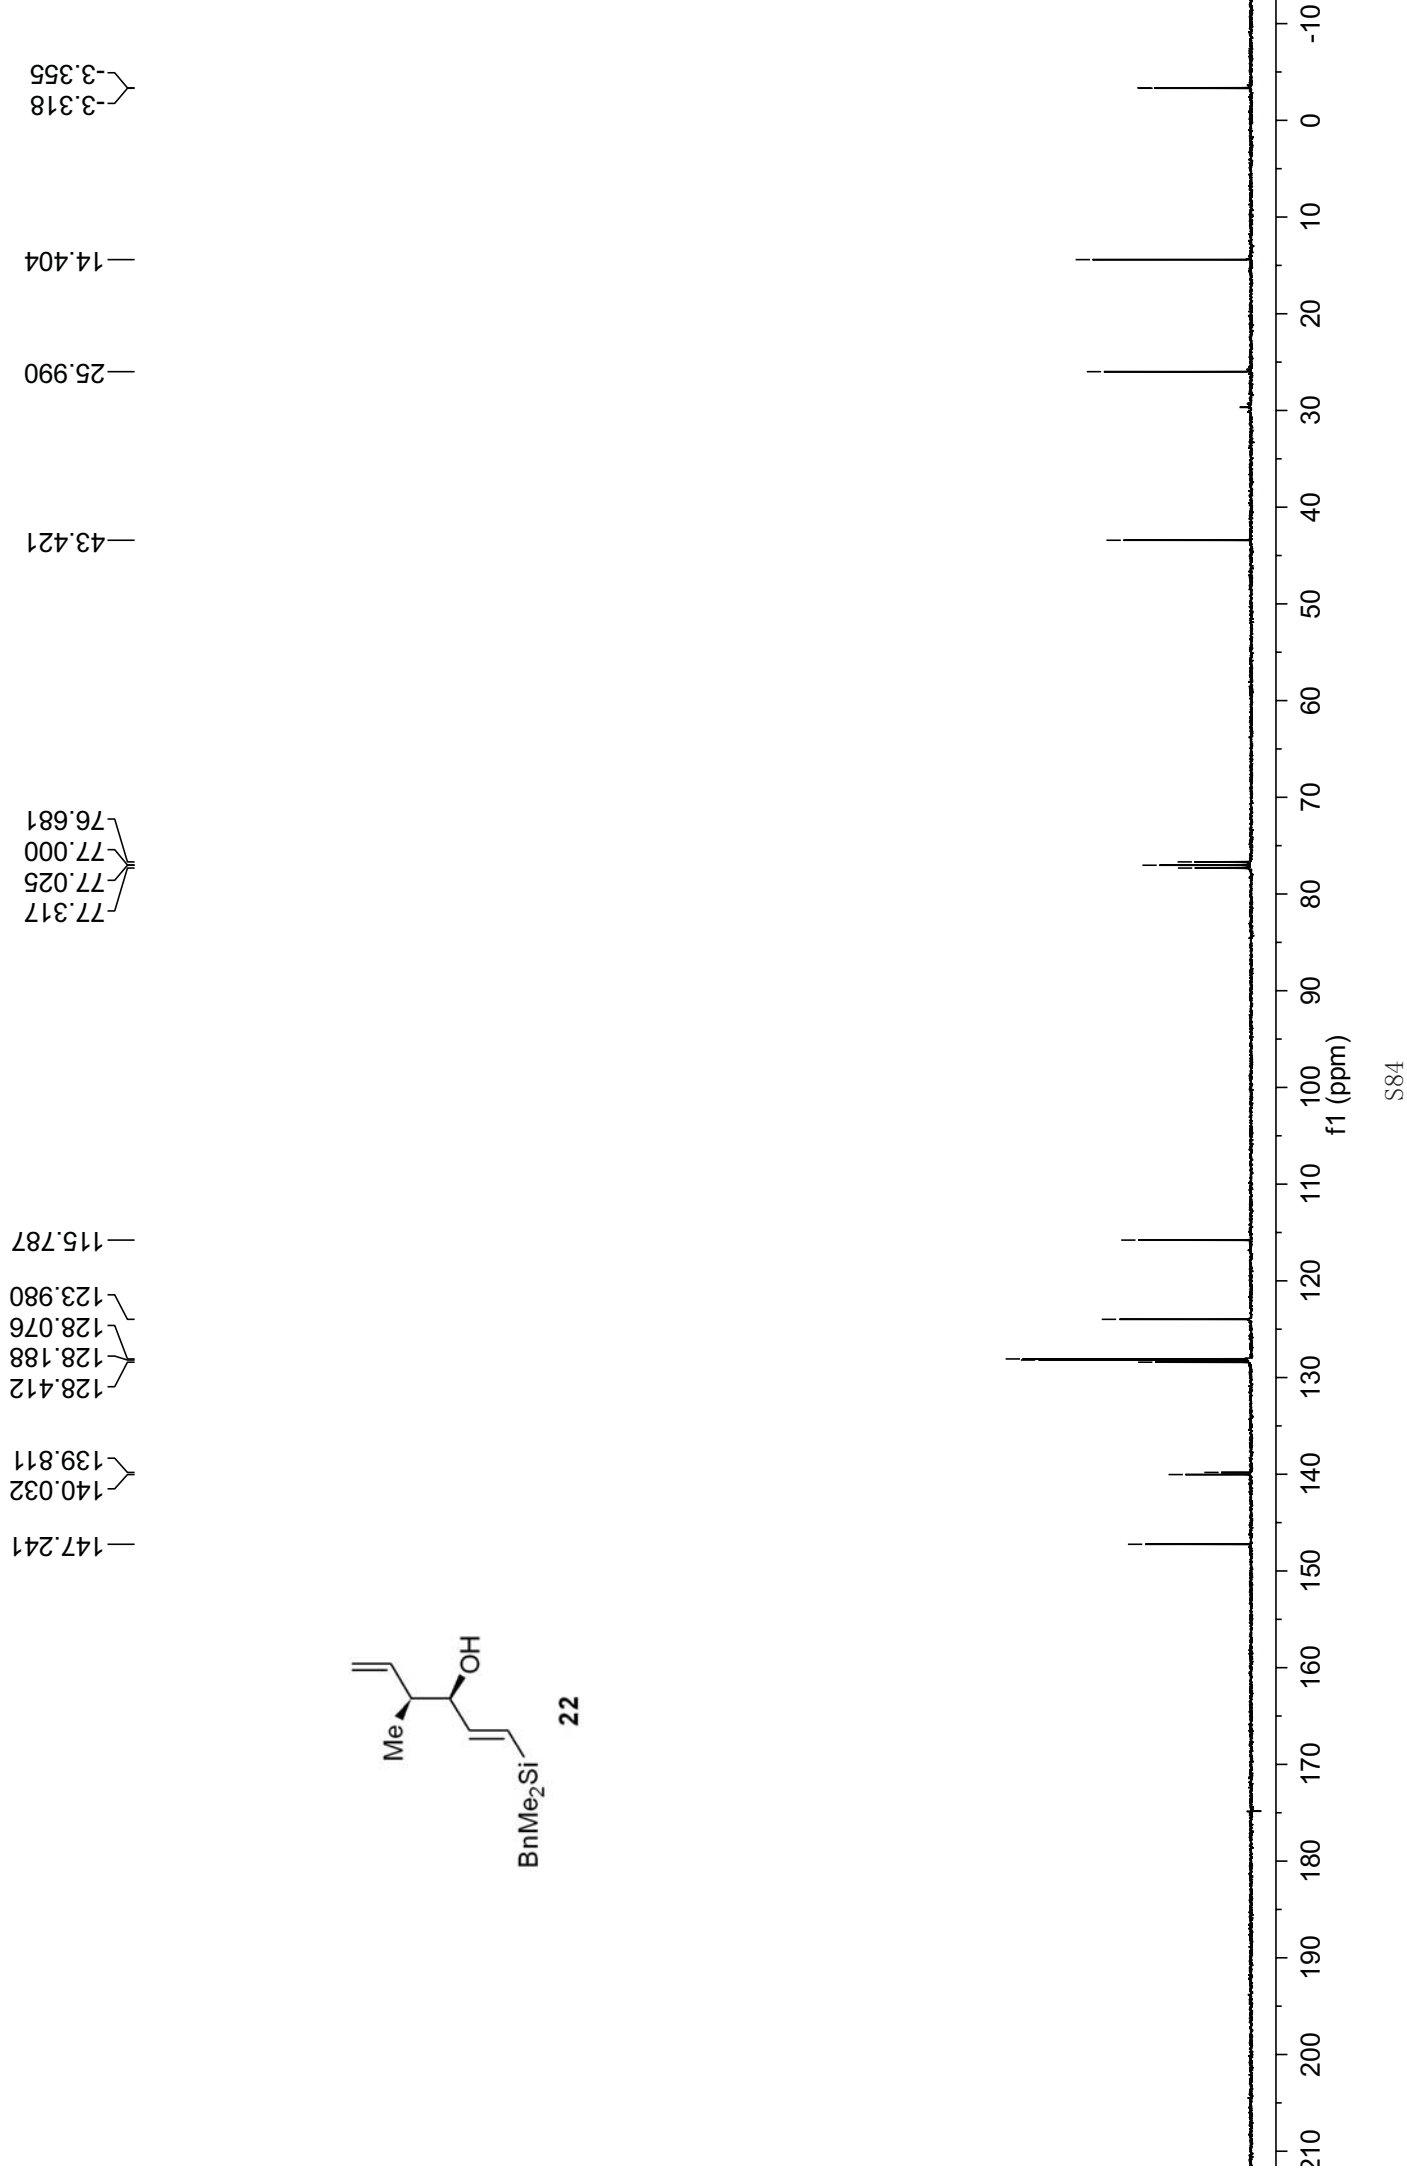

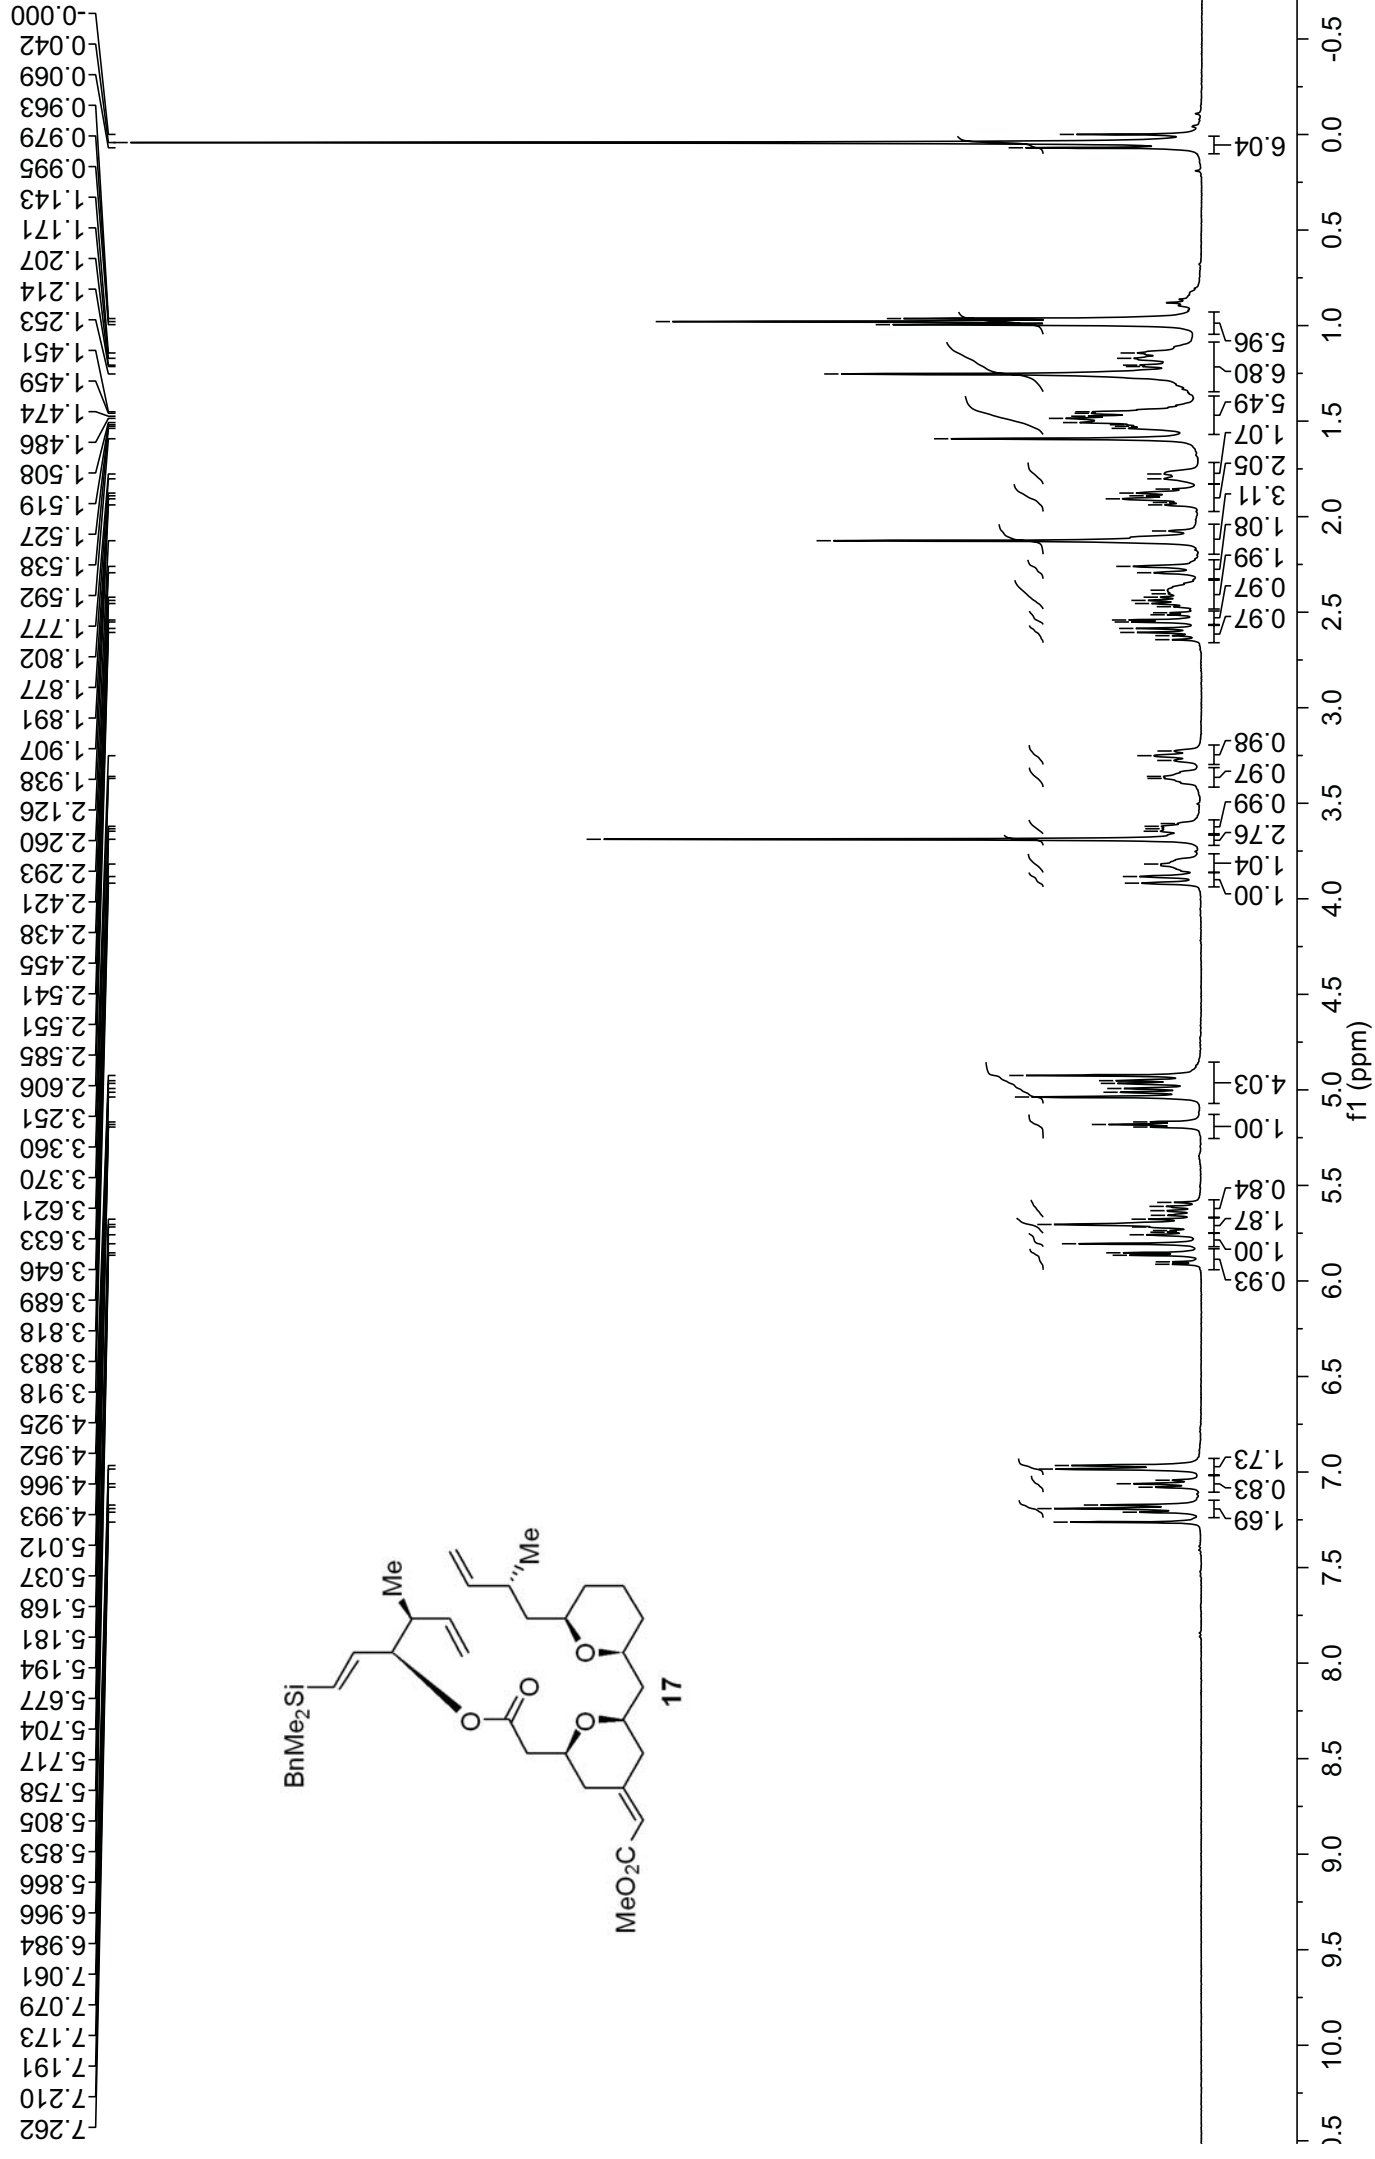

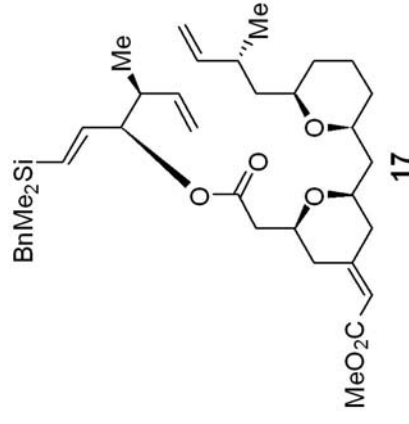

169.945  
166.753  
156.795  
144.326  
142.685  
139.718  
139.284  
130.386  
128.220  
128.073  
123.975  
115.383  
114.672  
113.073

78.895  
77.317  
77.000  
76.682  
75.391  
74.939  
74.158  
73.650

51.023  
43.432  
42.513  
41.667  
41.632  
41.353  
35.315  
34.262  
32.000  
31.590  
25.910  
23.640  
21.188  
15.179

-3.446

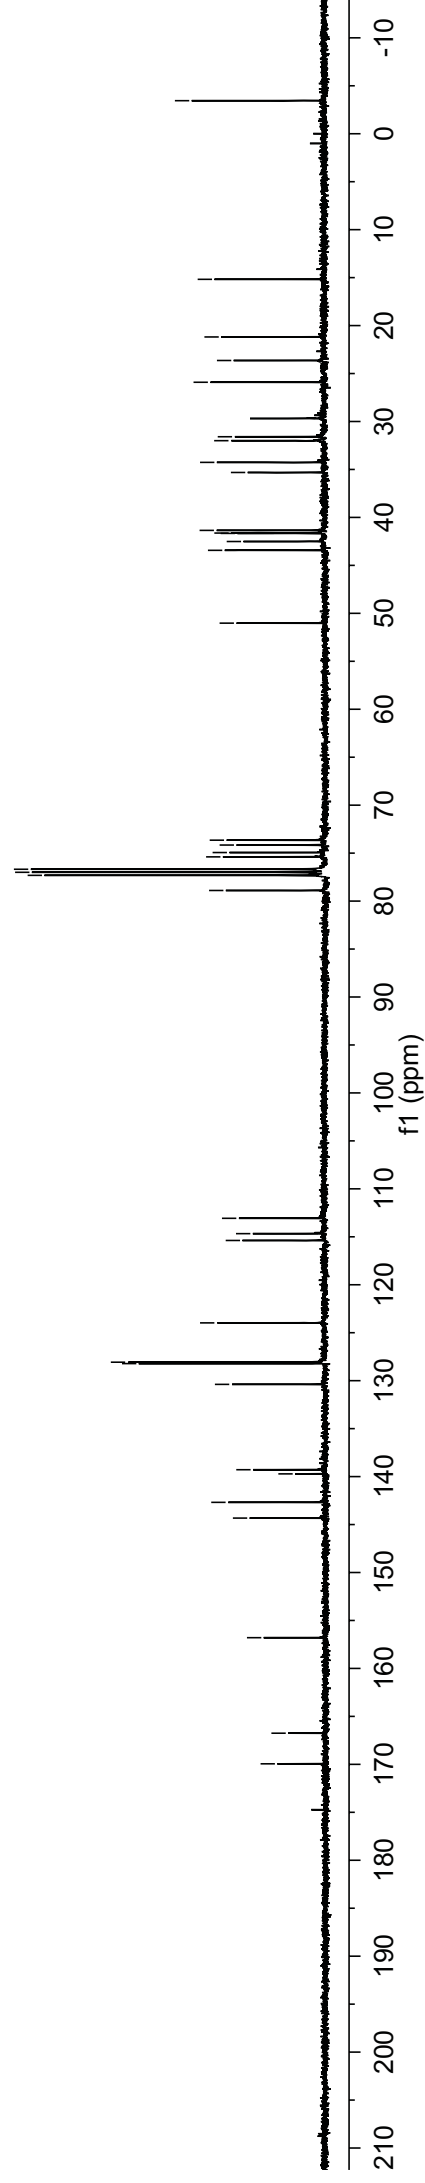

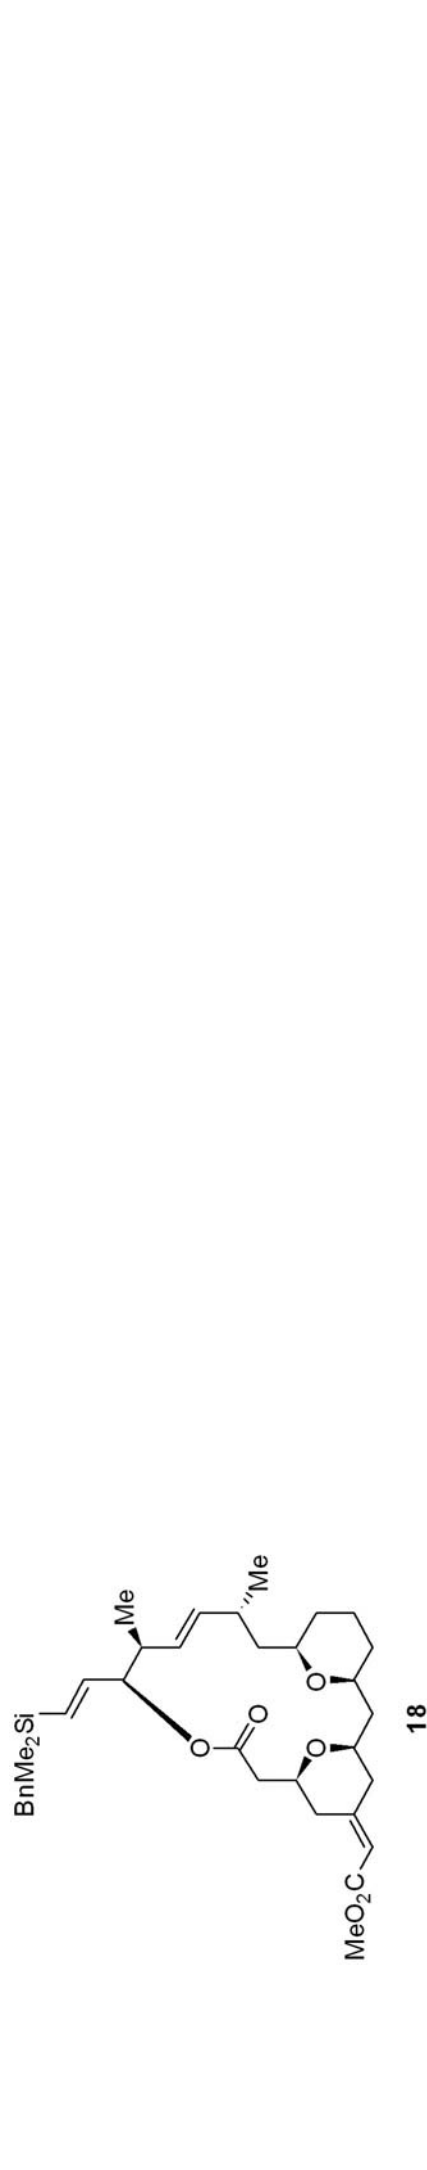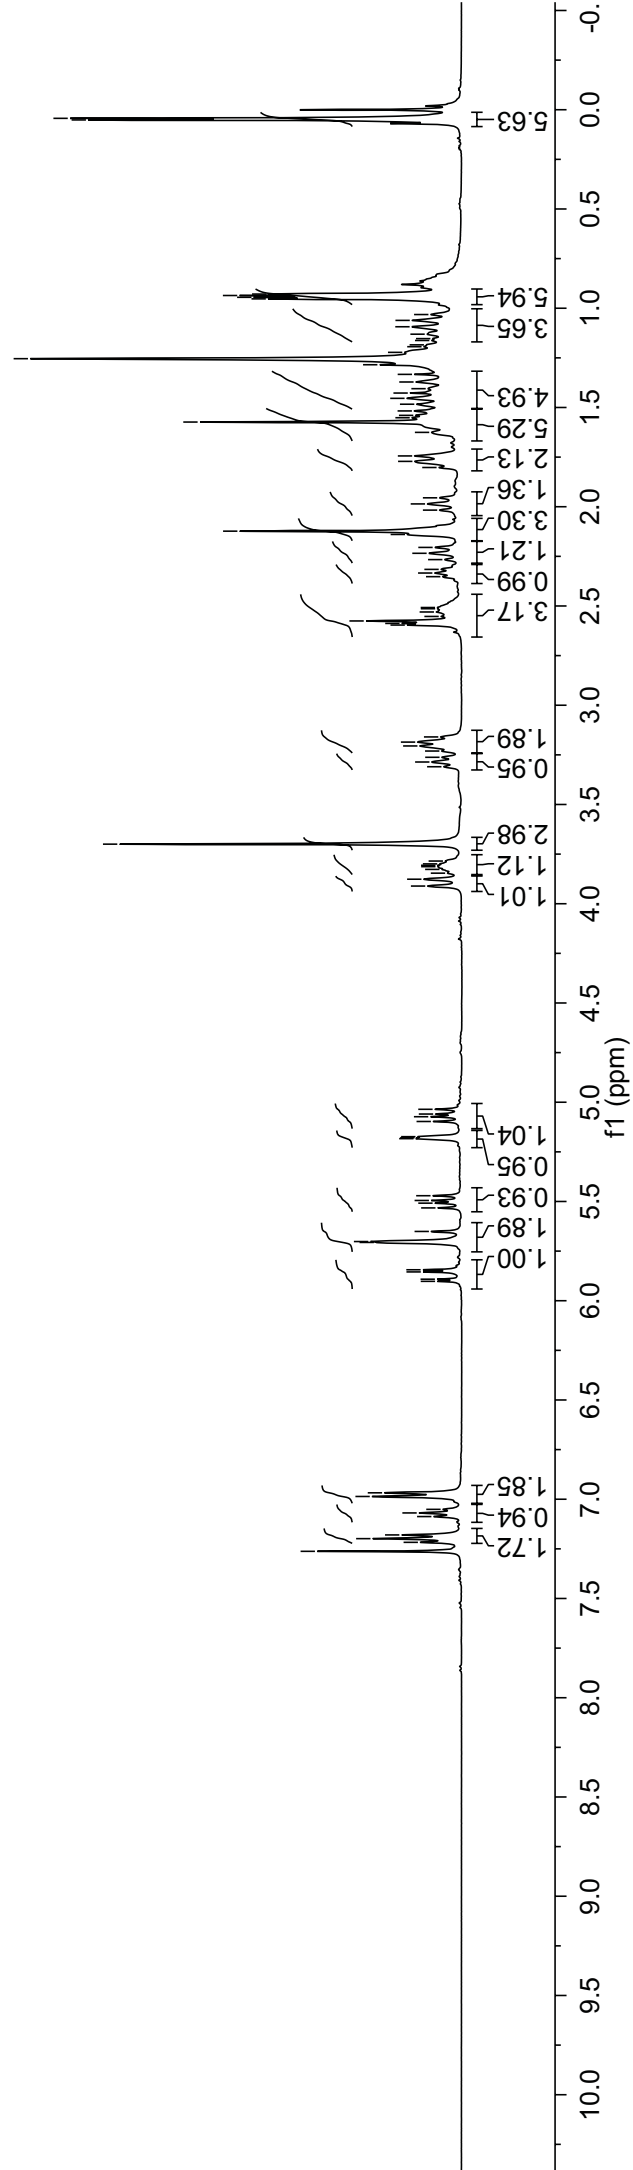

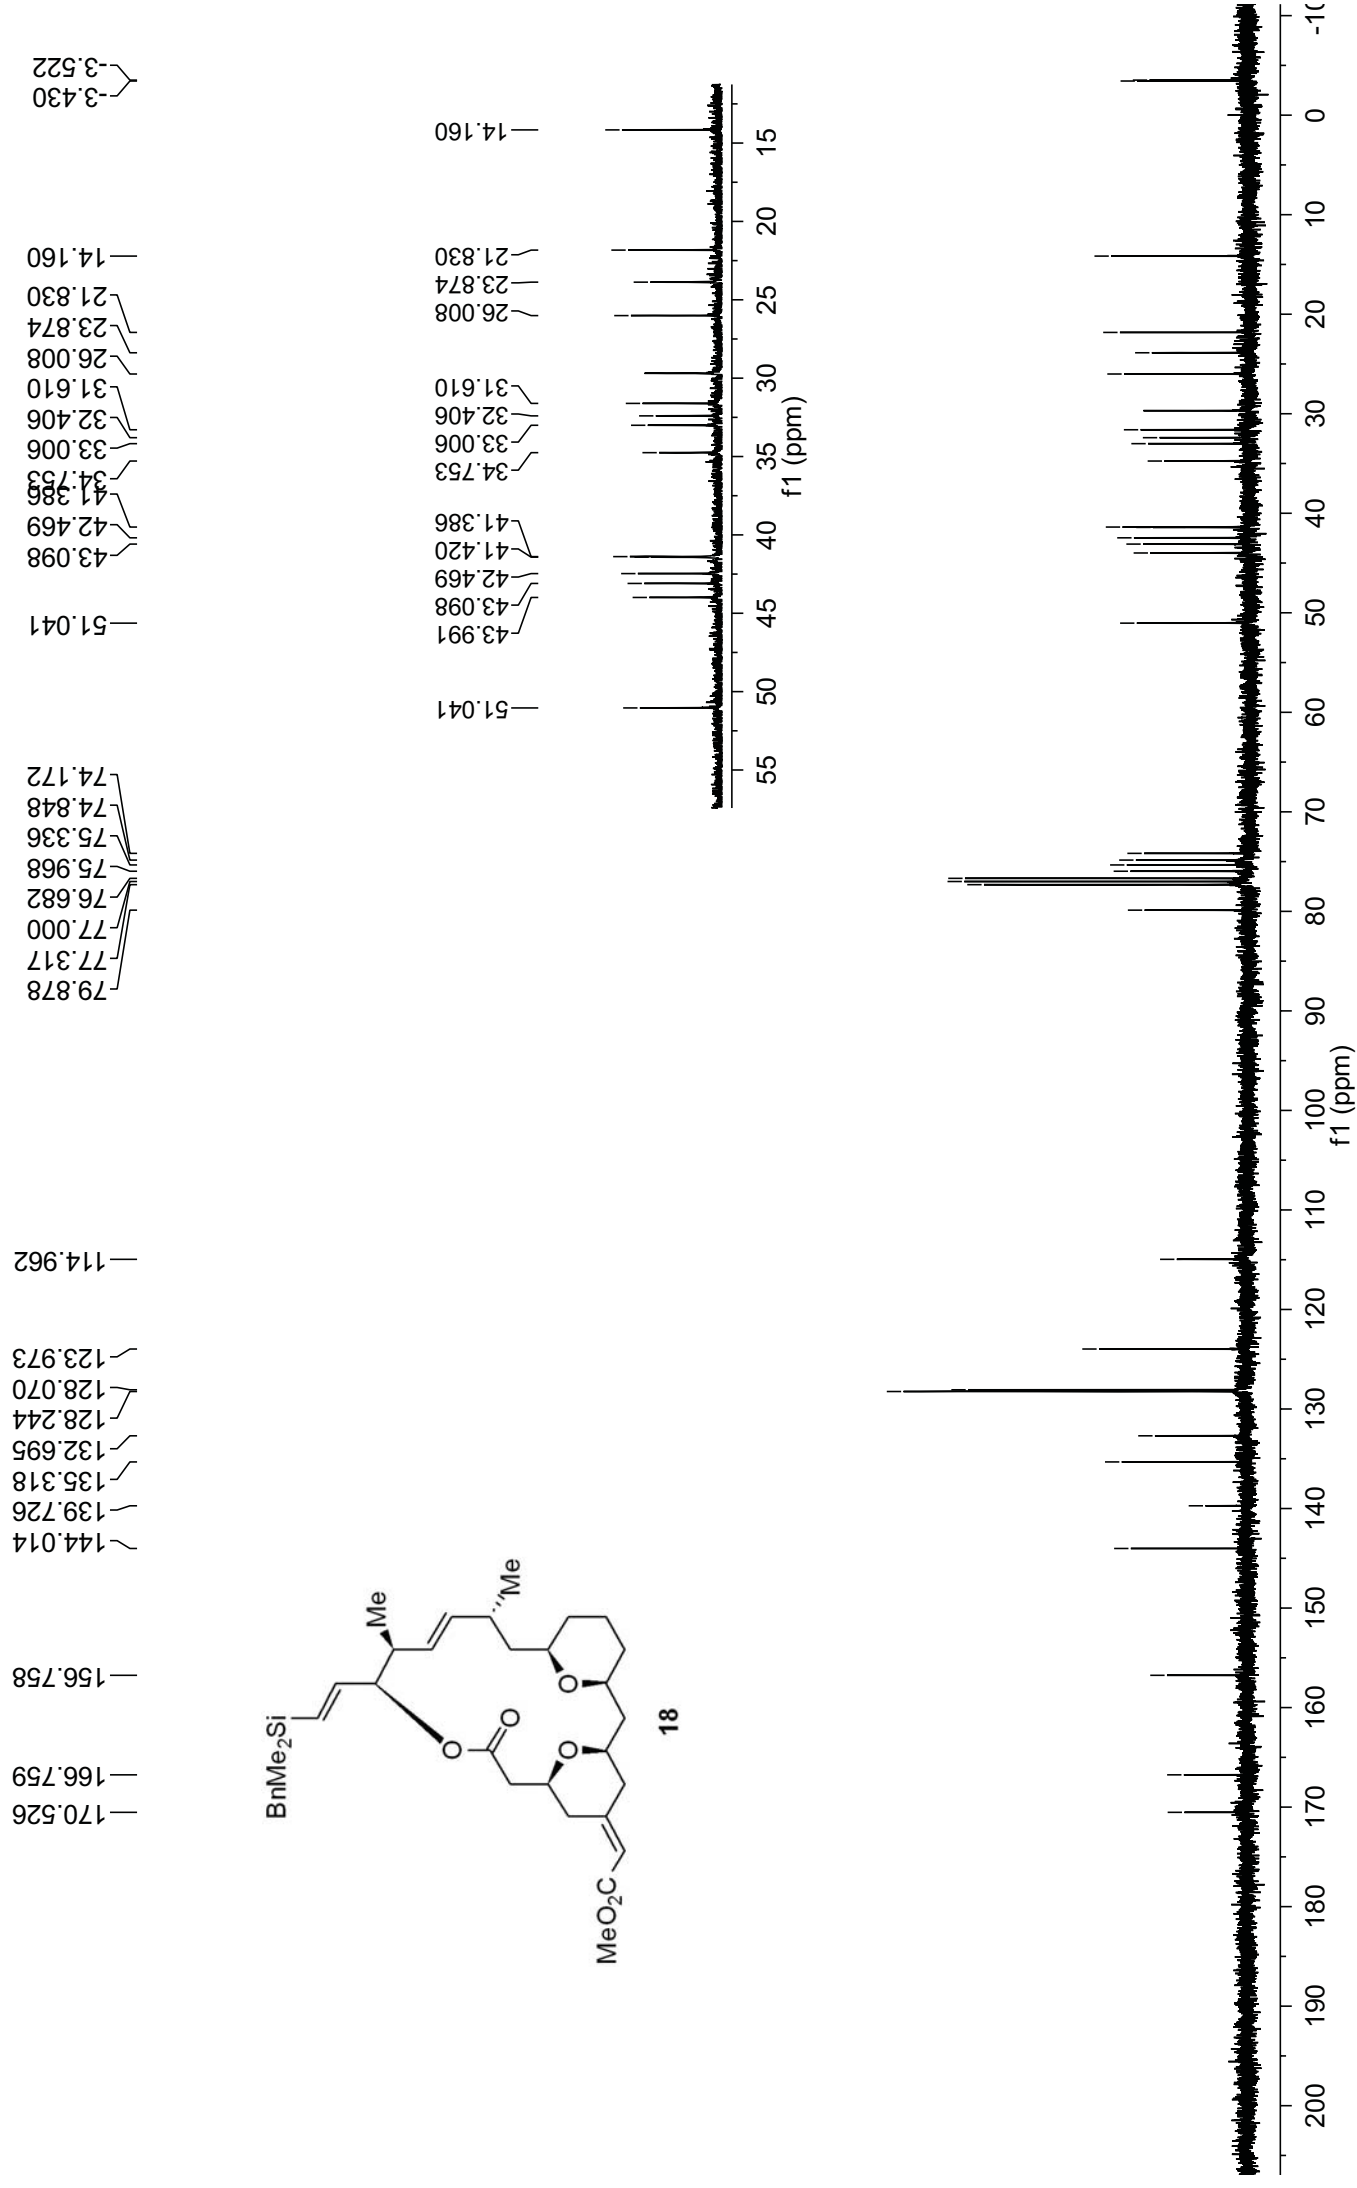

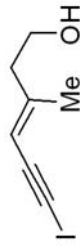

S12

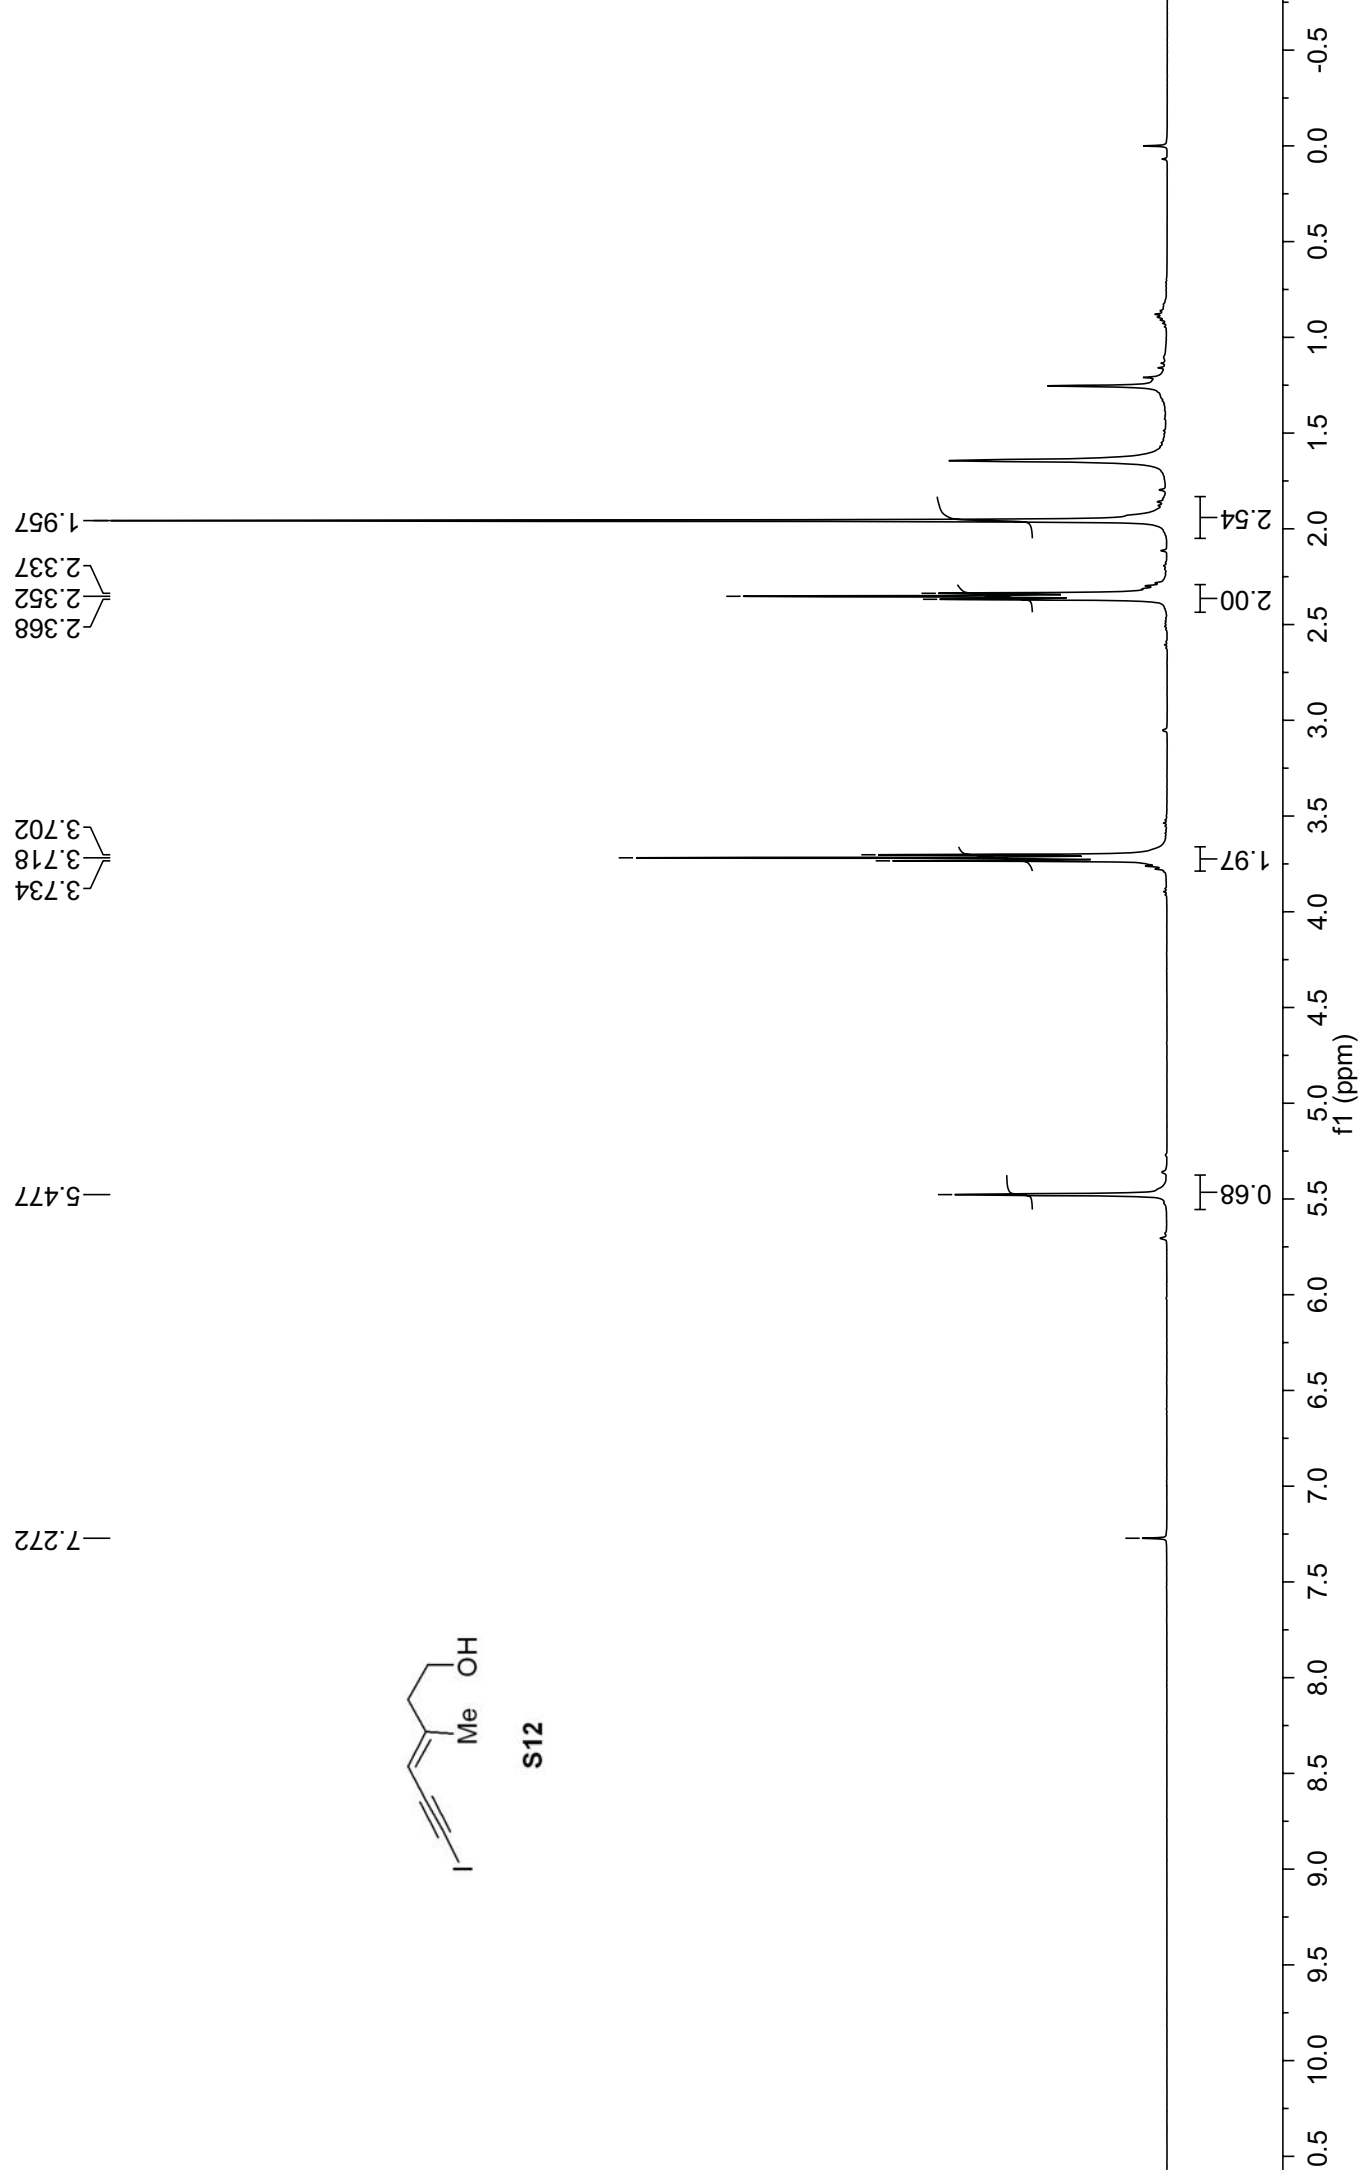

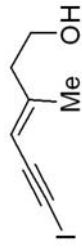

S12

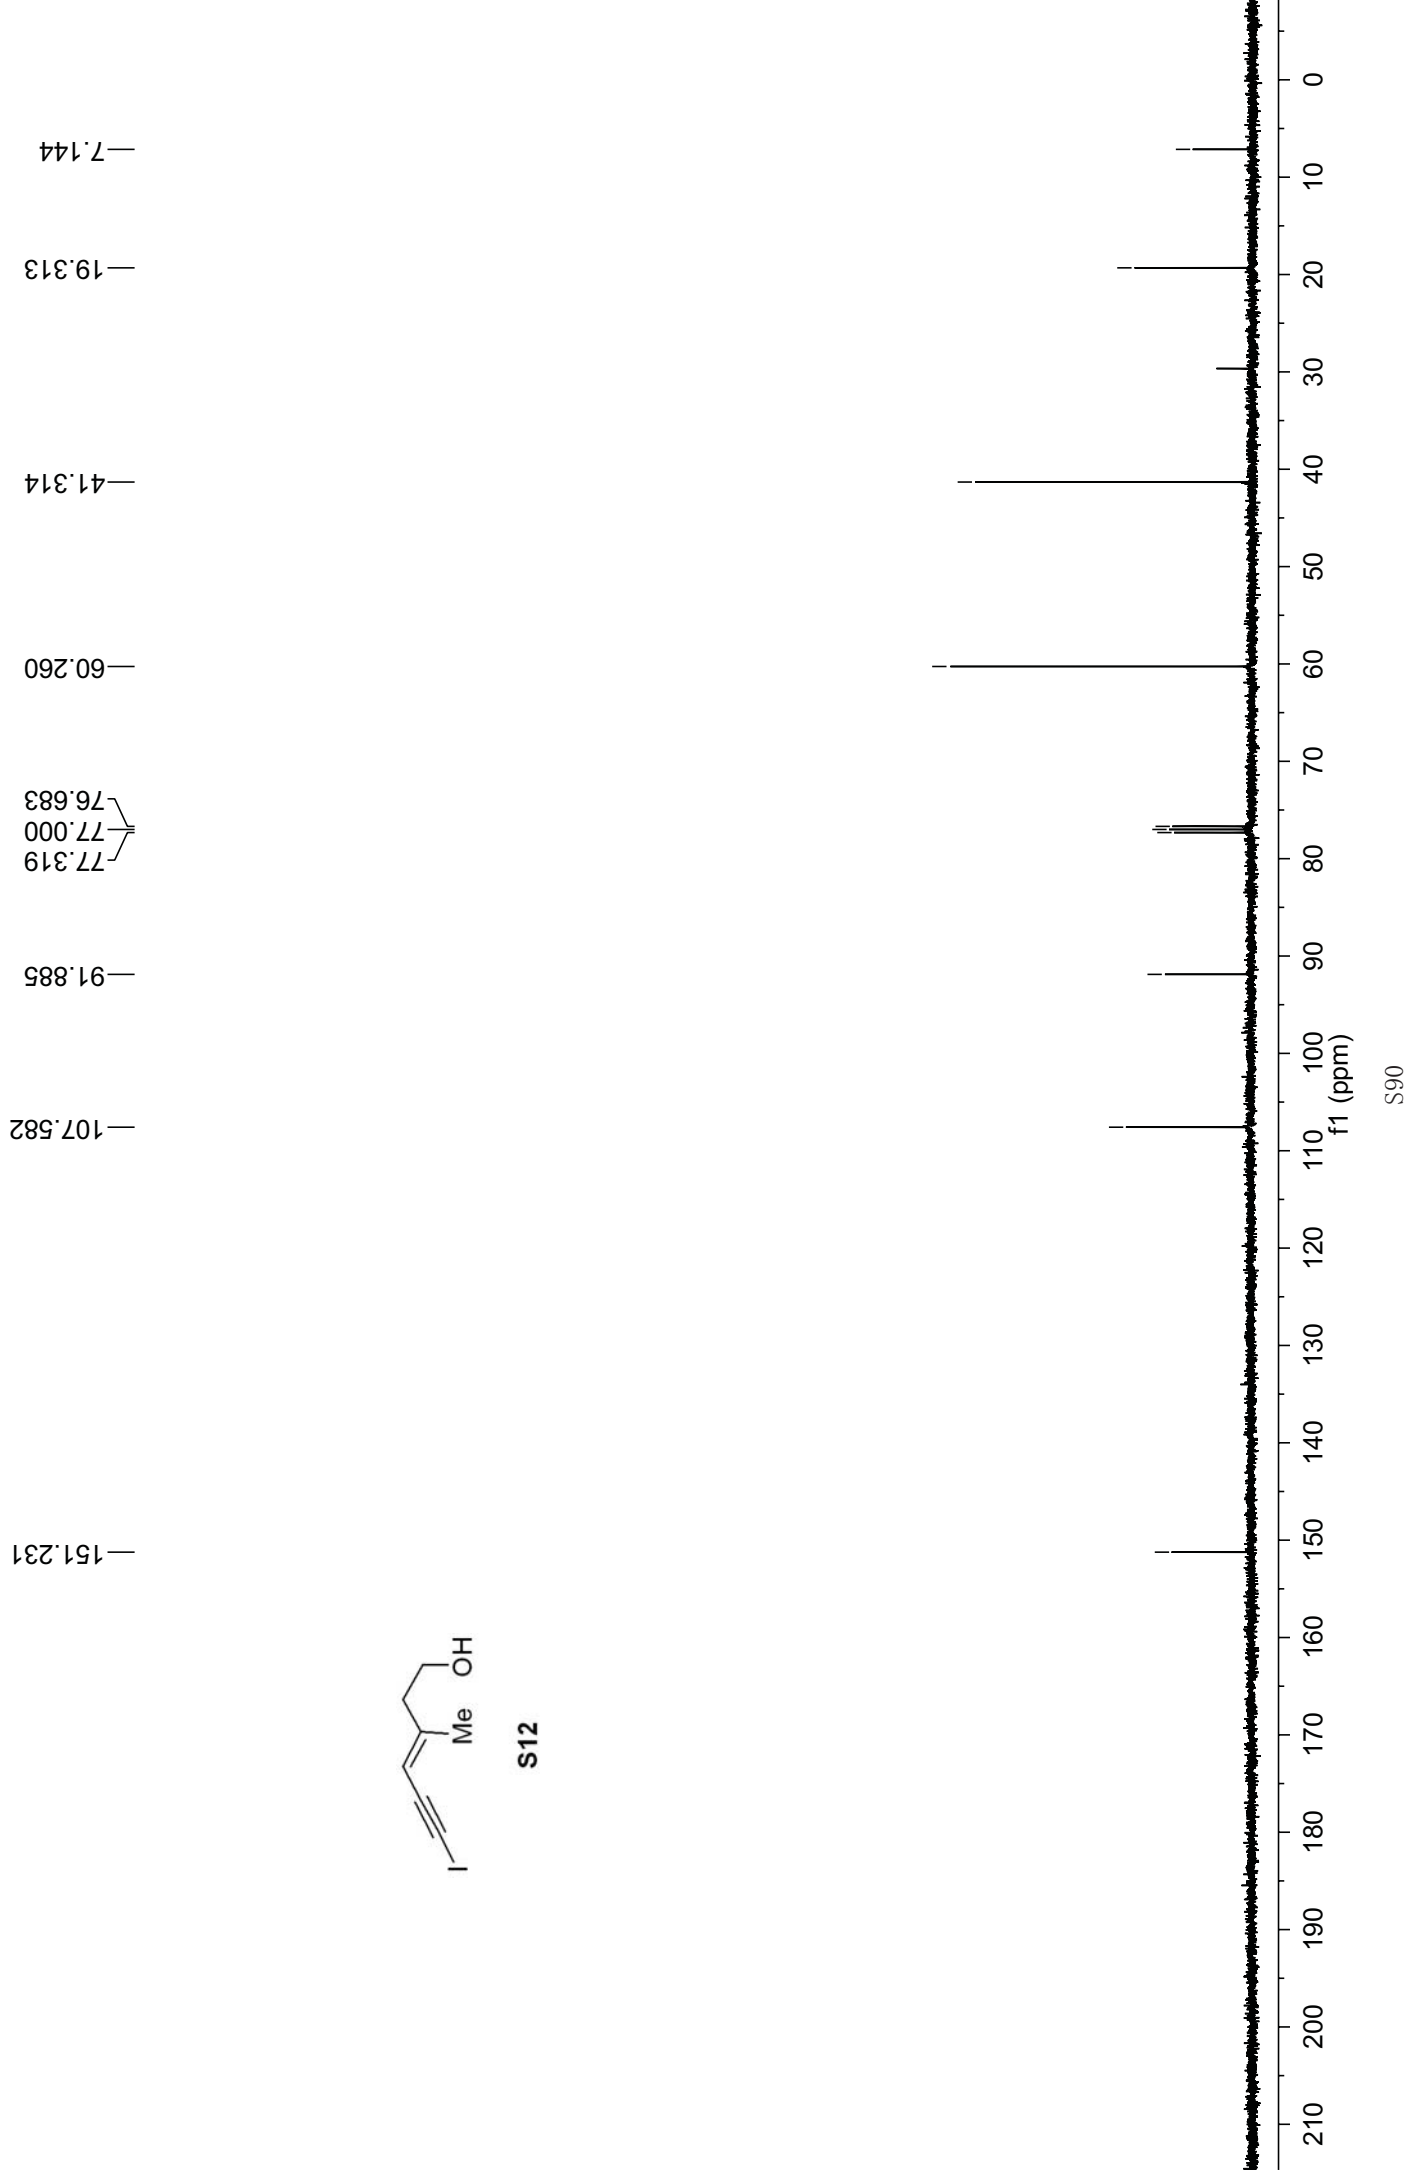

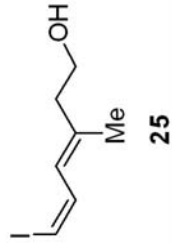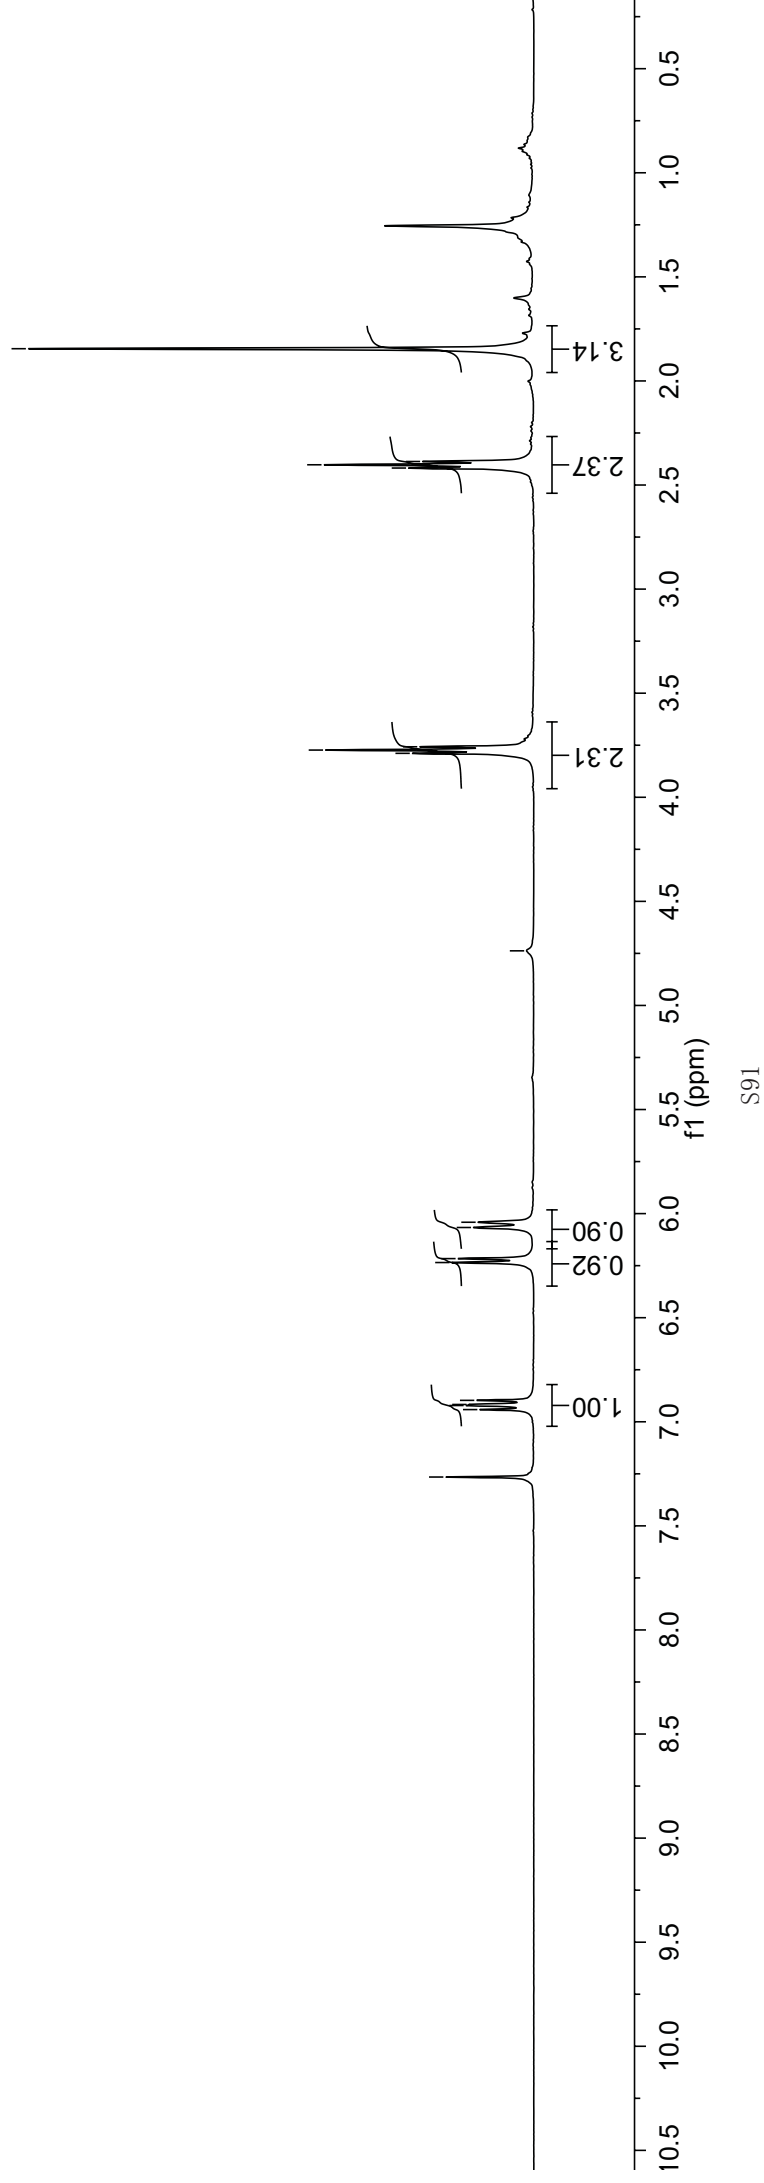

7.265  
6.941  
6.922  
6.917  
6.897  
6.235  
6.216  
6.067  
6.042  
4.738  
3.789  
3.773  
3.757  
2.418  
2.403  
2.387  
1.845

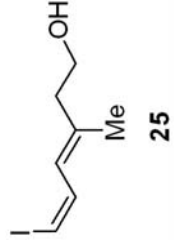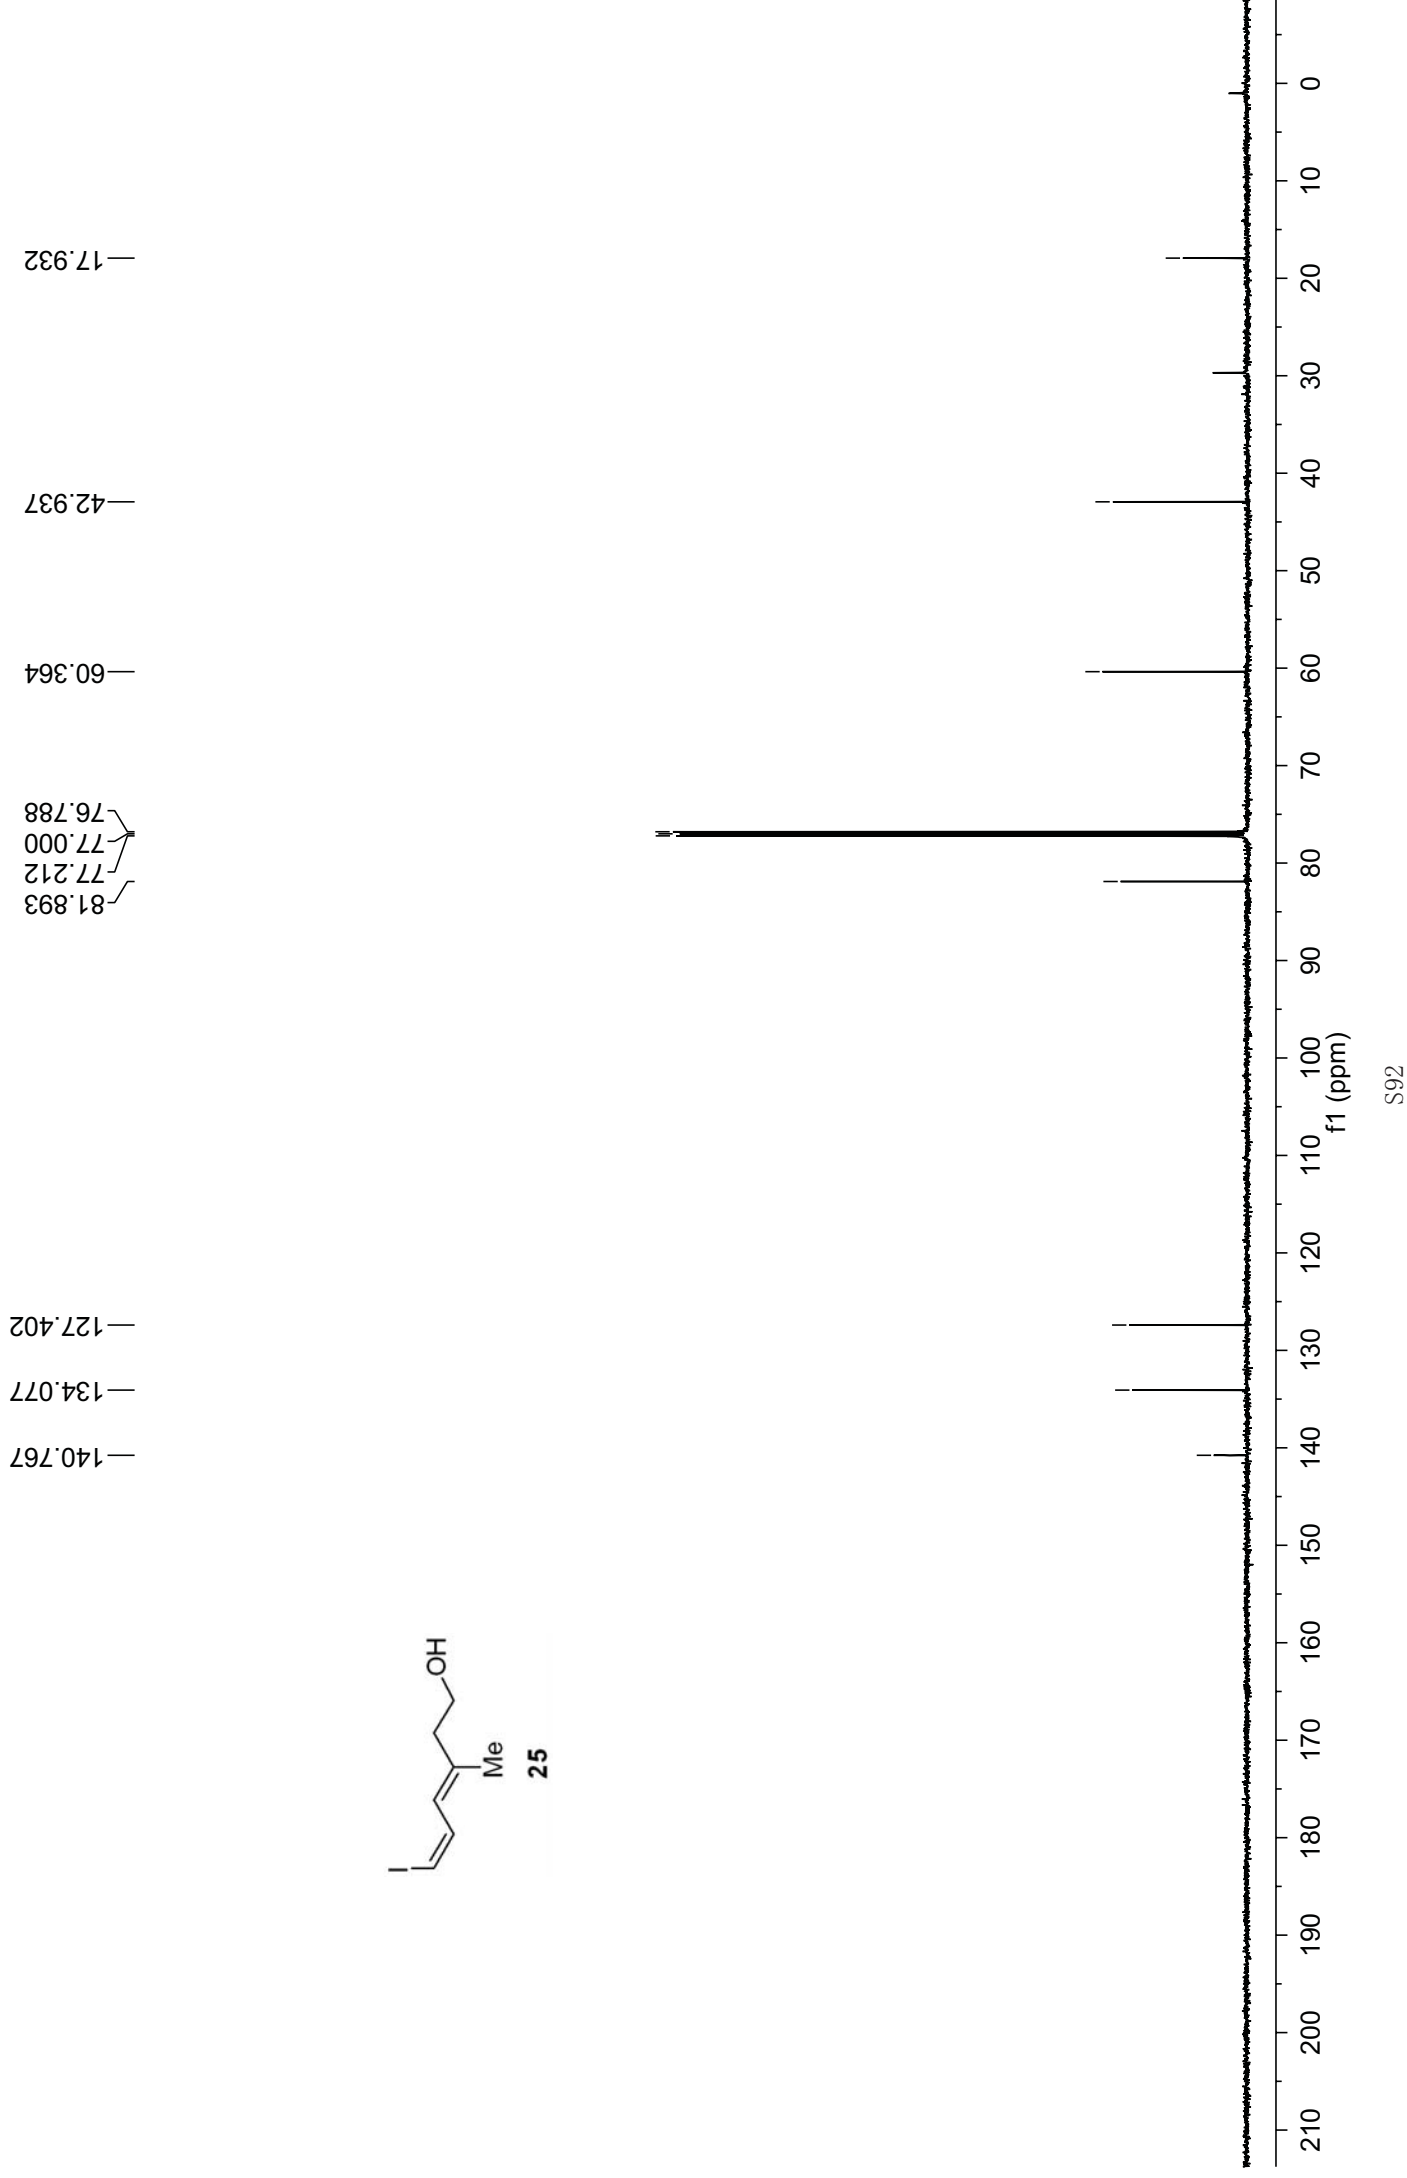

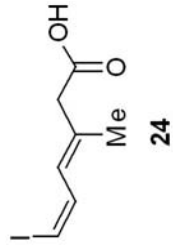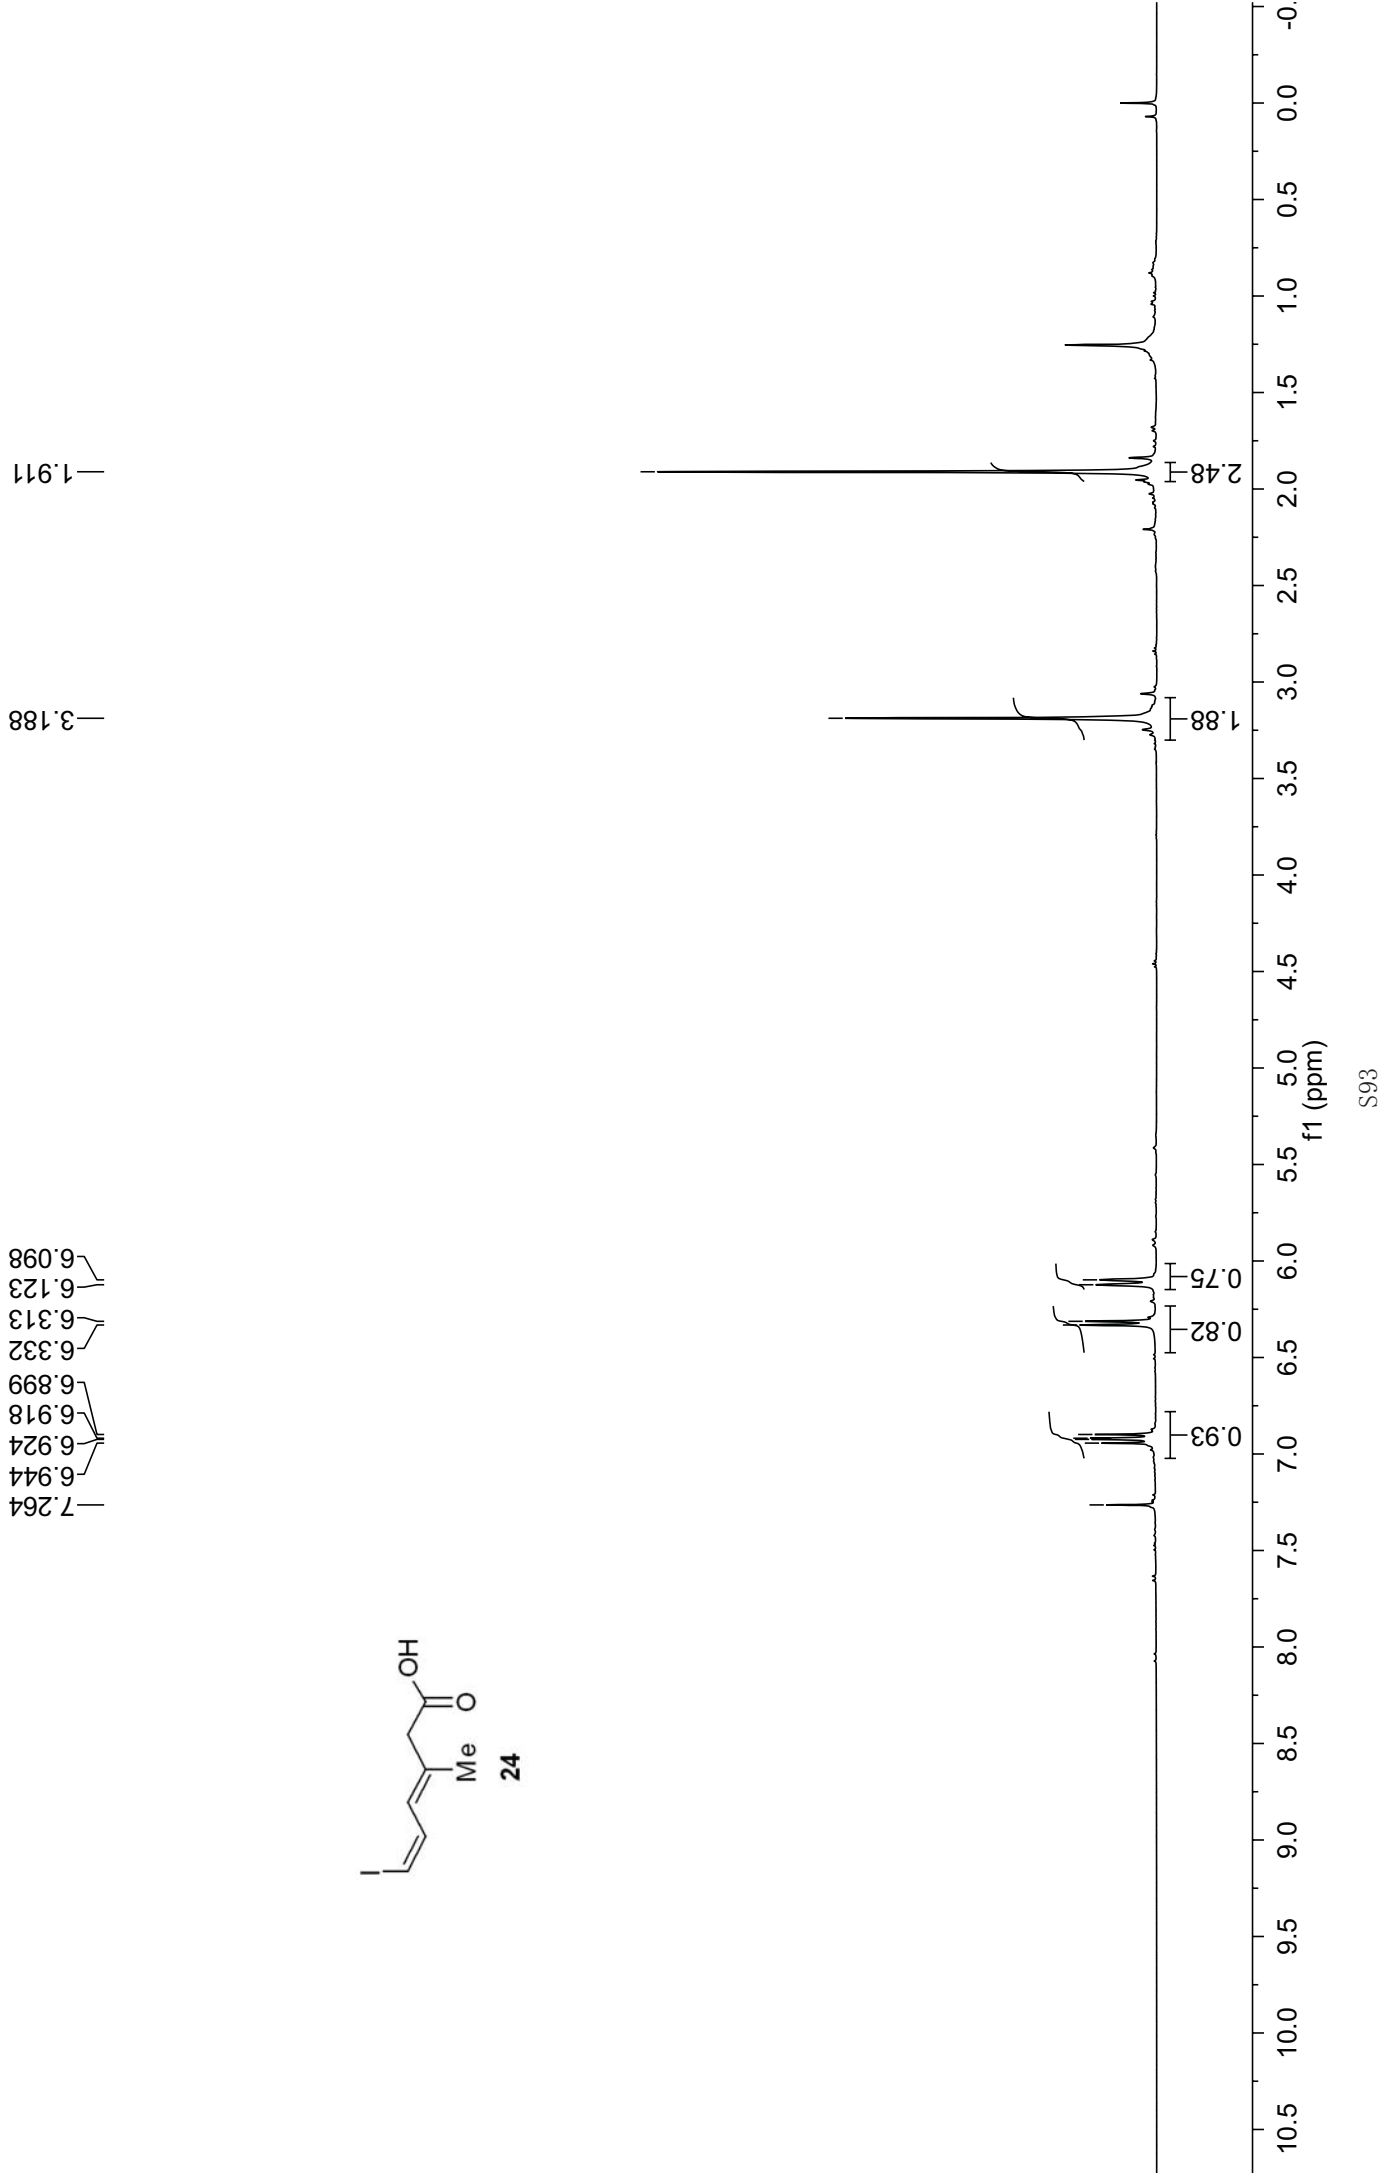

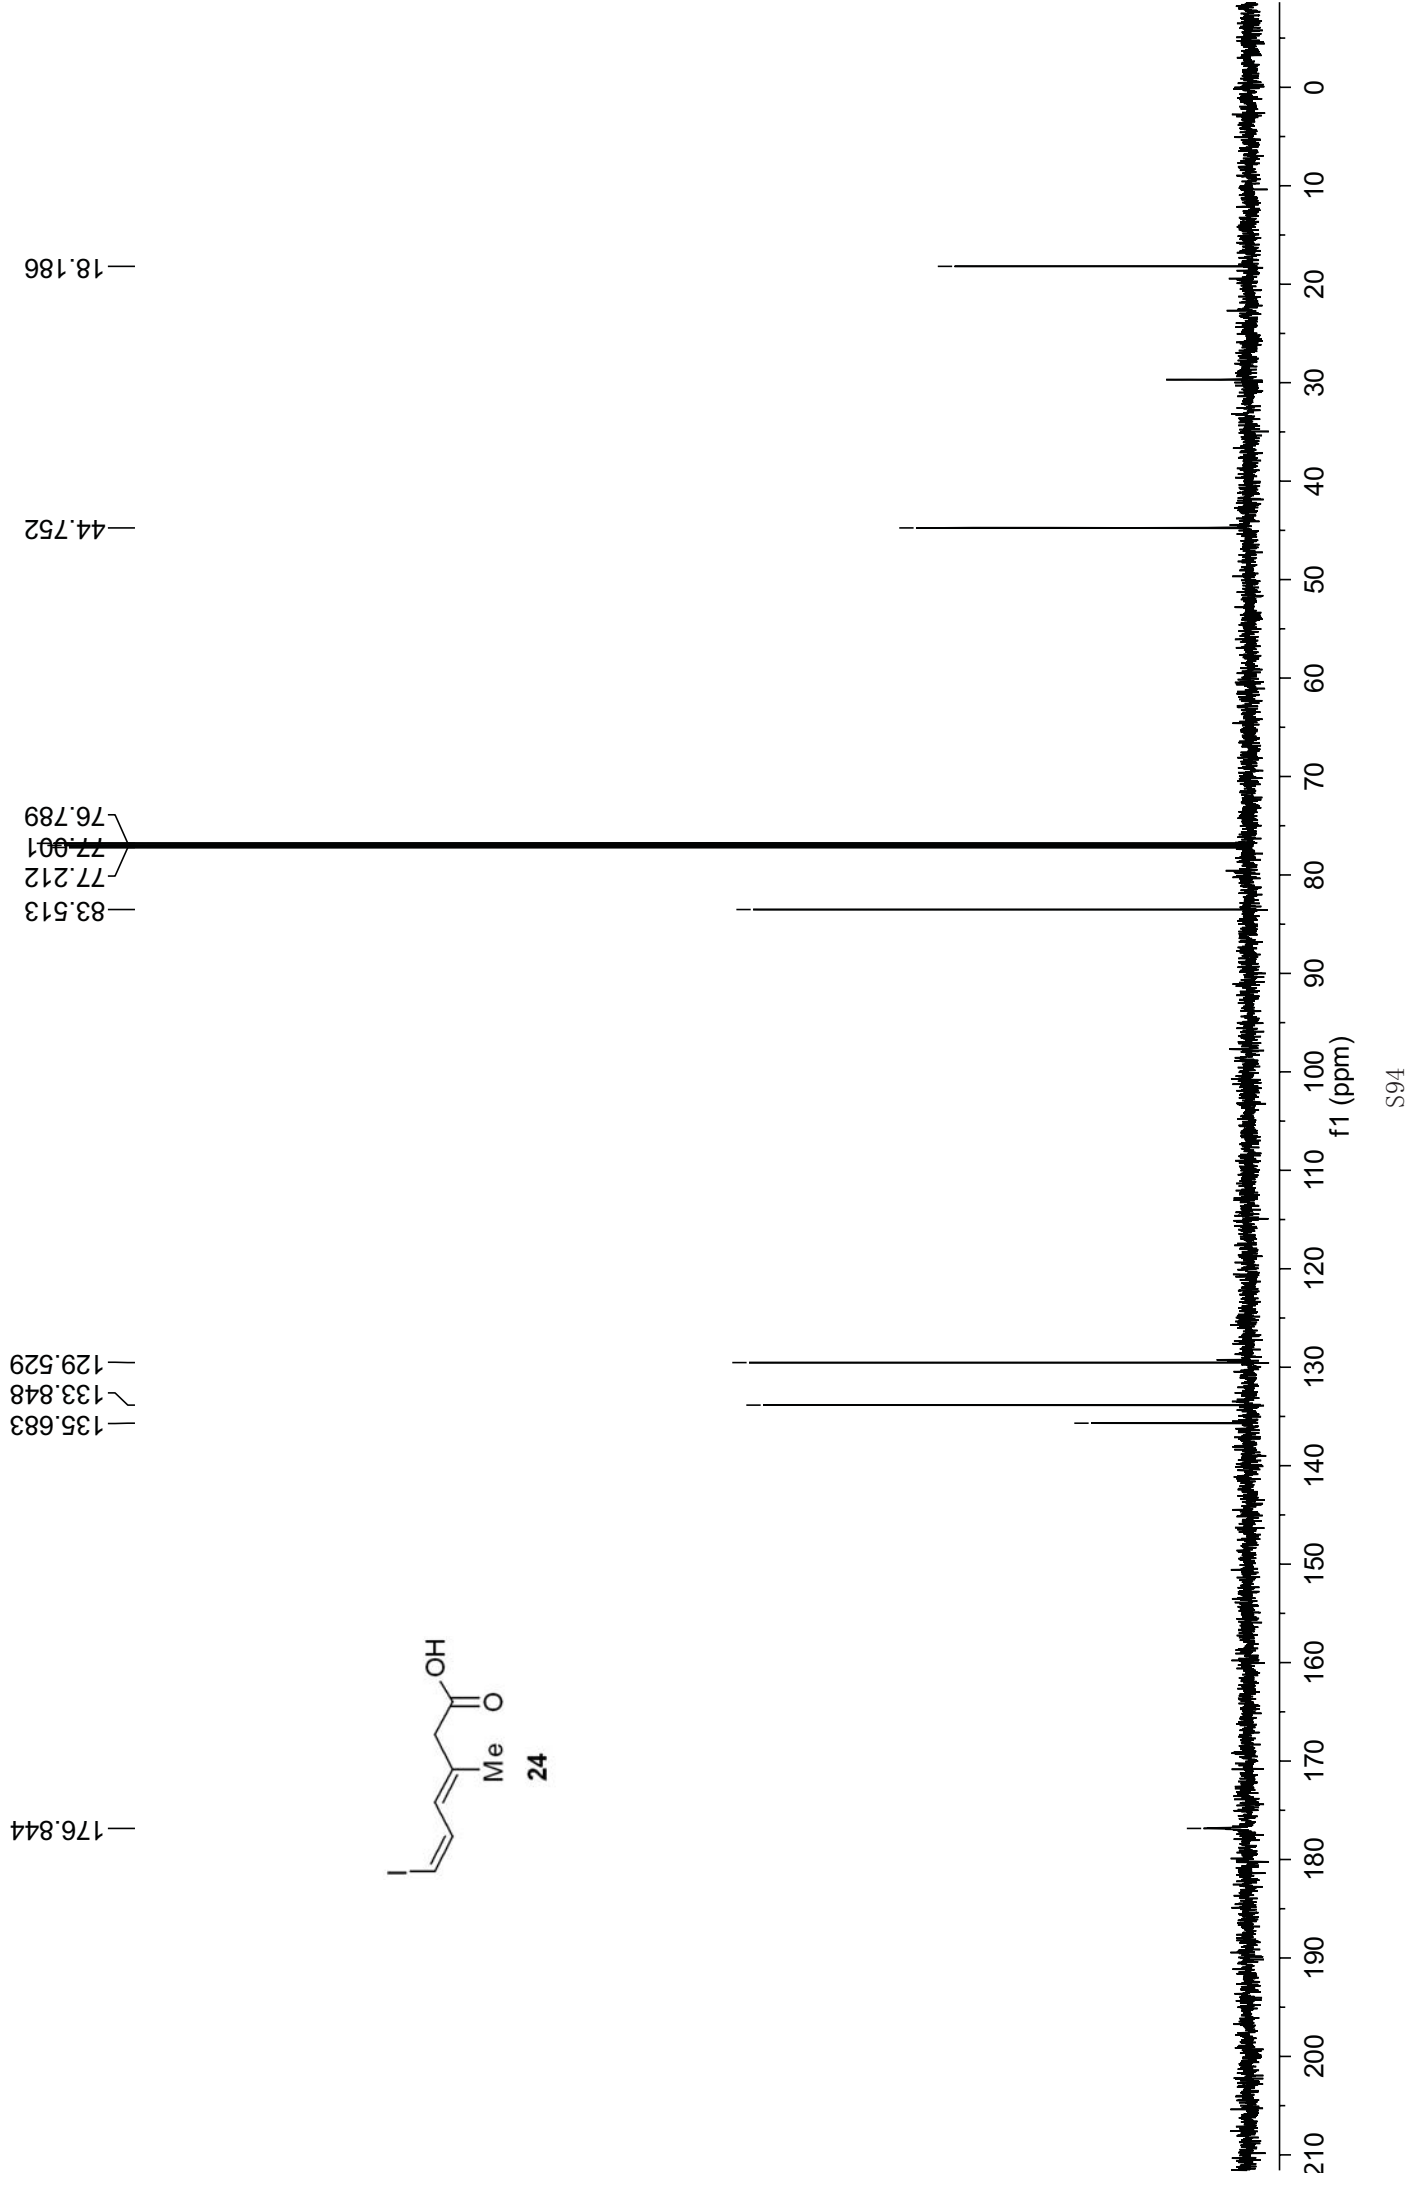

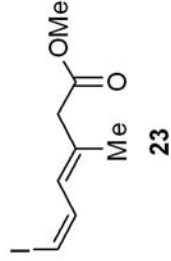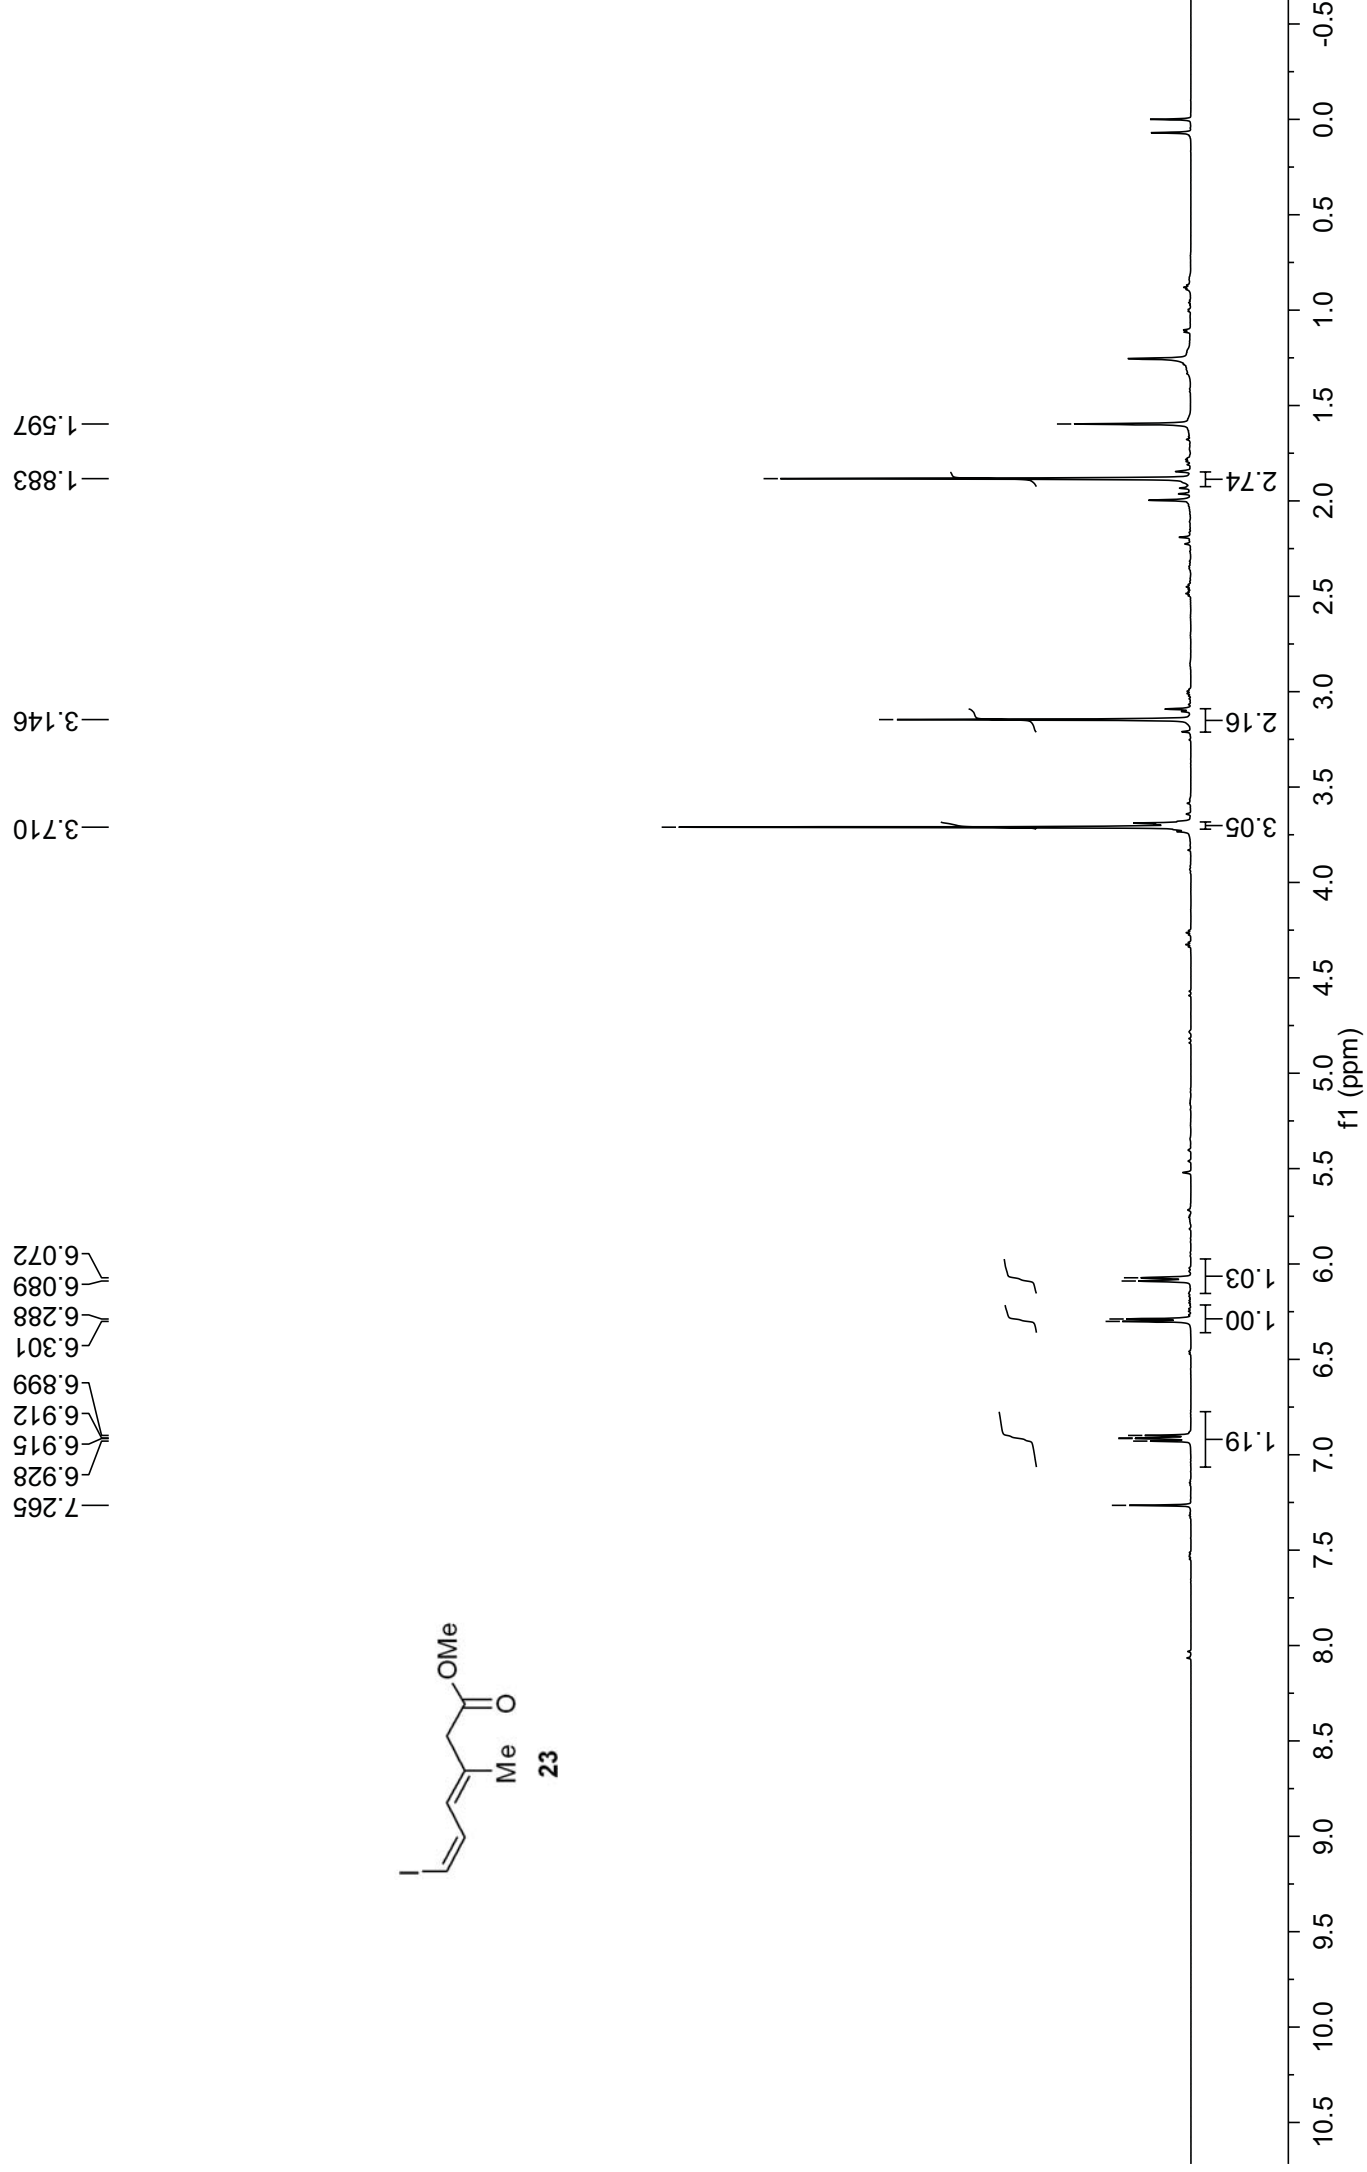

171.231  
 136.455  
 133.956  
 128.980  
 83.072  
 77.212  
 77.000  
 76.789  
 51.966  
 44.953  
 18.169

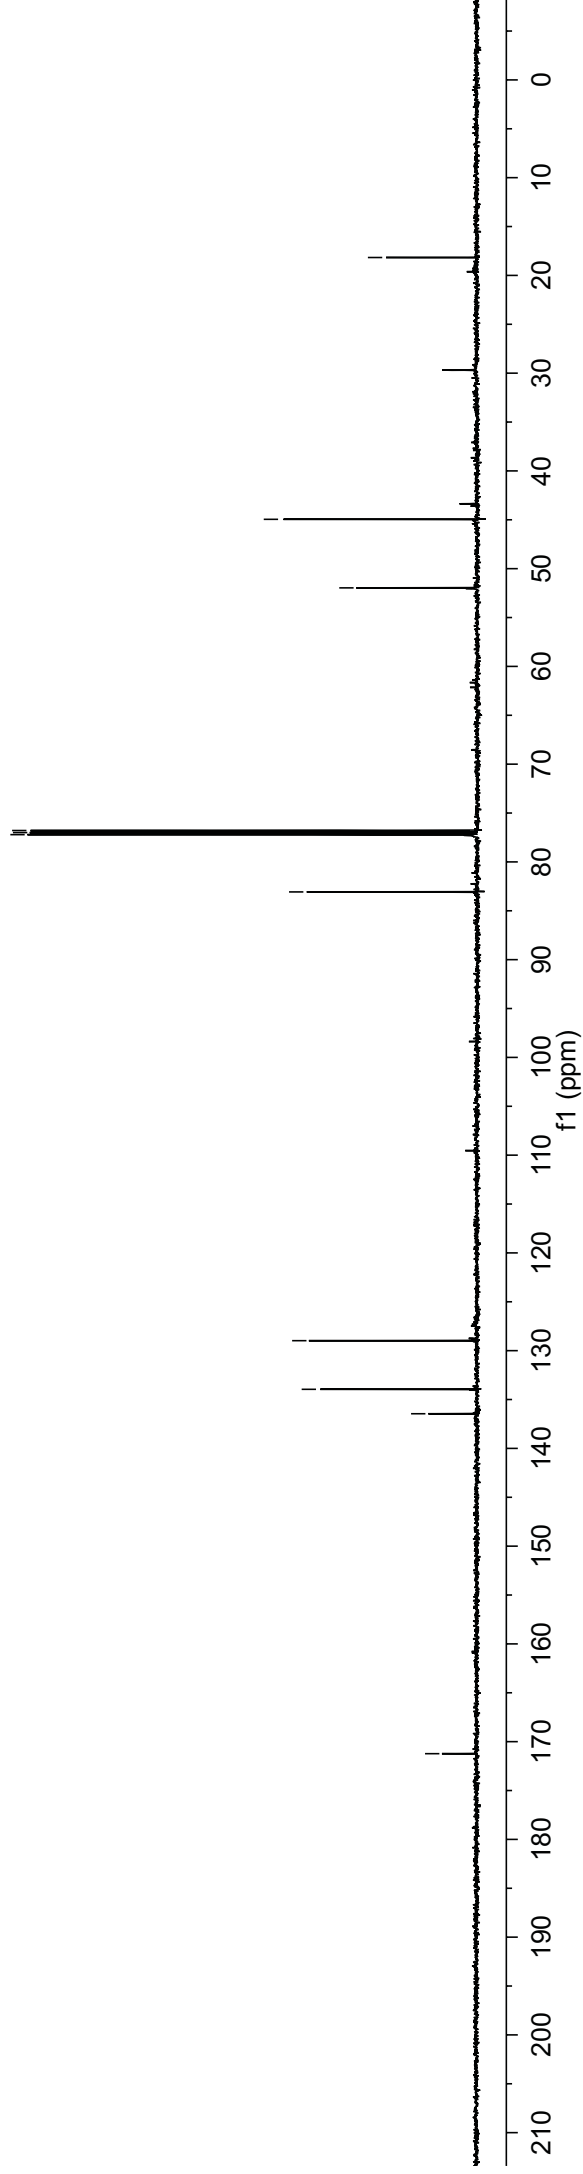

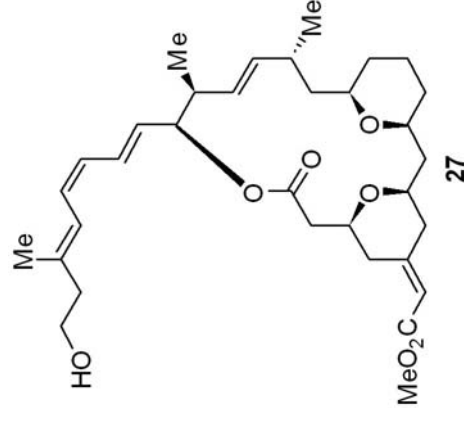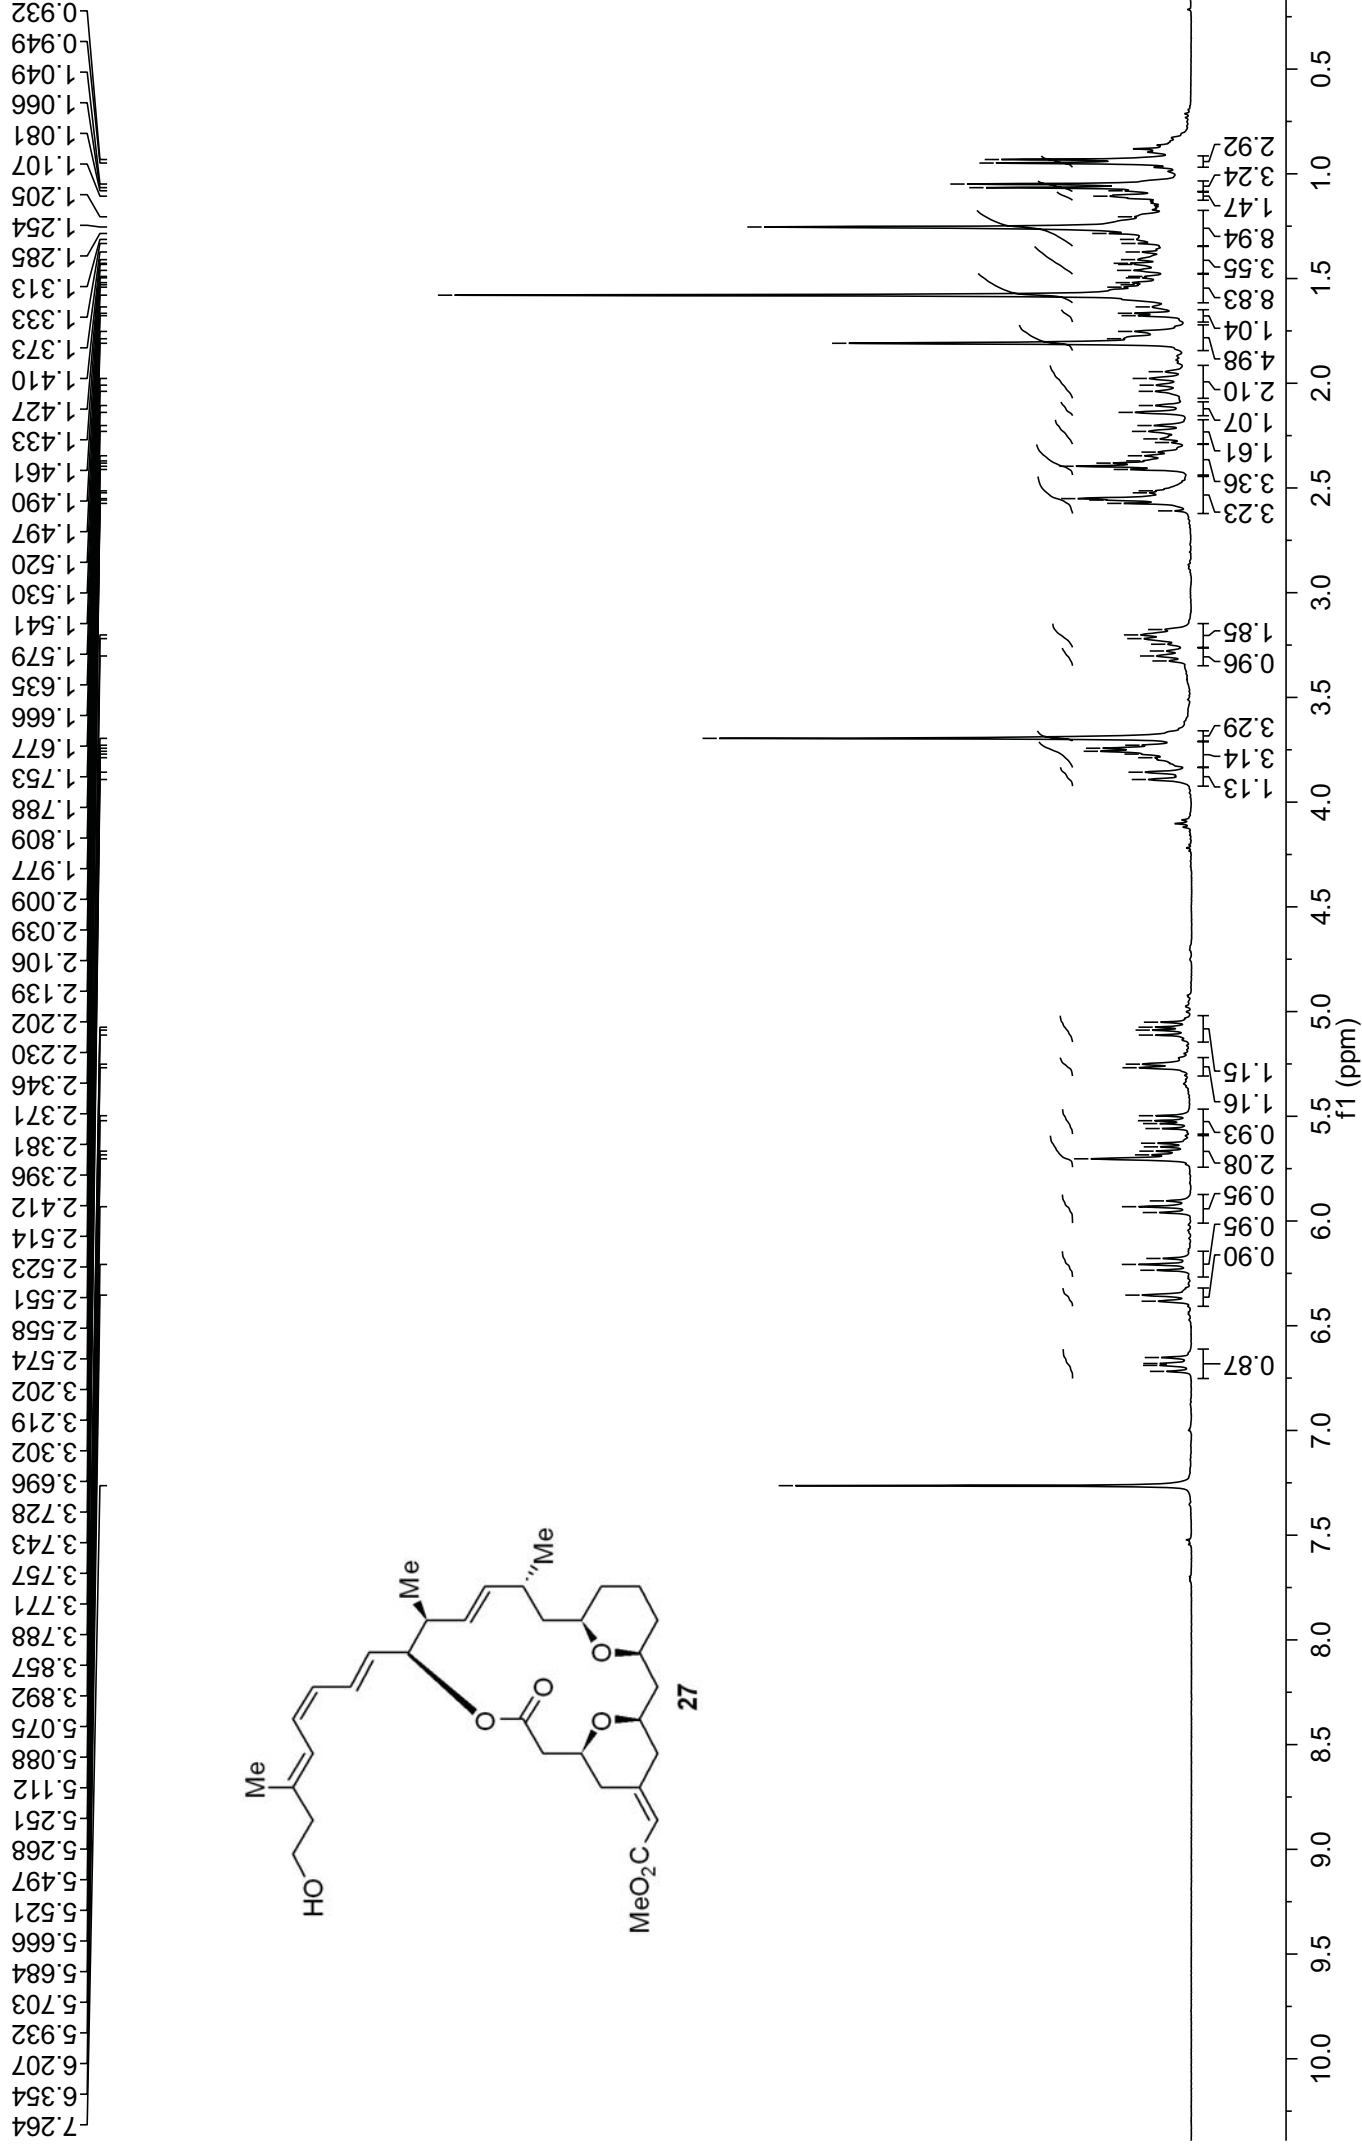

— 170.709  
— 166.777  
— 156.754  
— 136.535  
— 135.431  
— 132.526  
— 131.029  
— 127.641  
— 127.093  
— 125.697  
— 122.751  
— 114.949

78.695  
77.318  
77.000  
76.683  
75.989  
75.324  
74.860  
74.150

— 60.412

— 51.055  
43.378  
43.074  
42.468  
41.592  
34.770  
33.041  
32.452  
31.599

23.873  
21.837  
16.323  
14.374



44.068  
43.378  
43.074  
42.468  
42.176  
41.592

— 34.770  
33.041  
32.452  
31.599

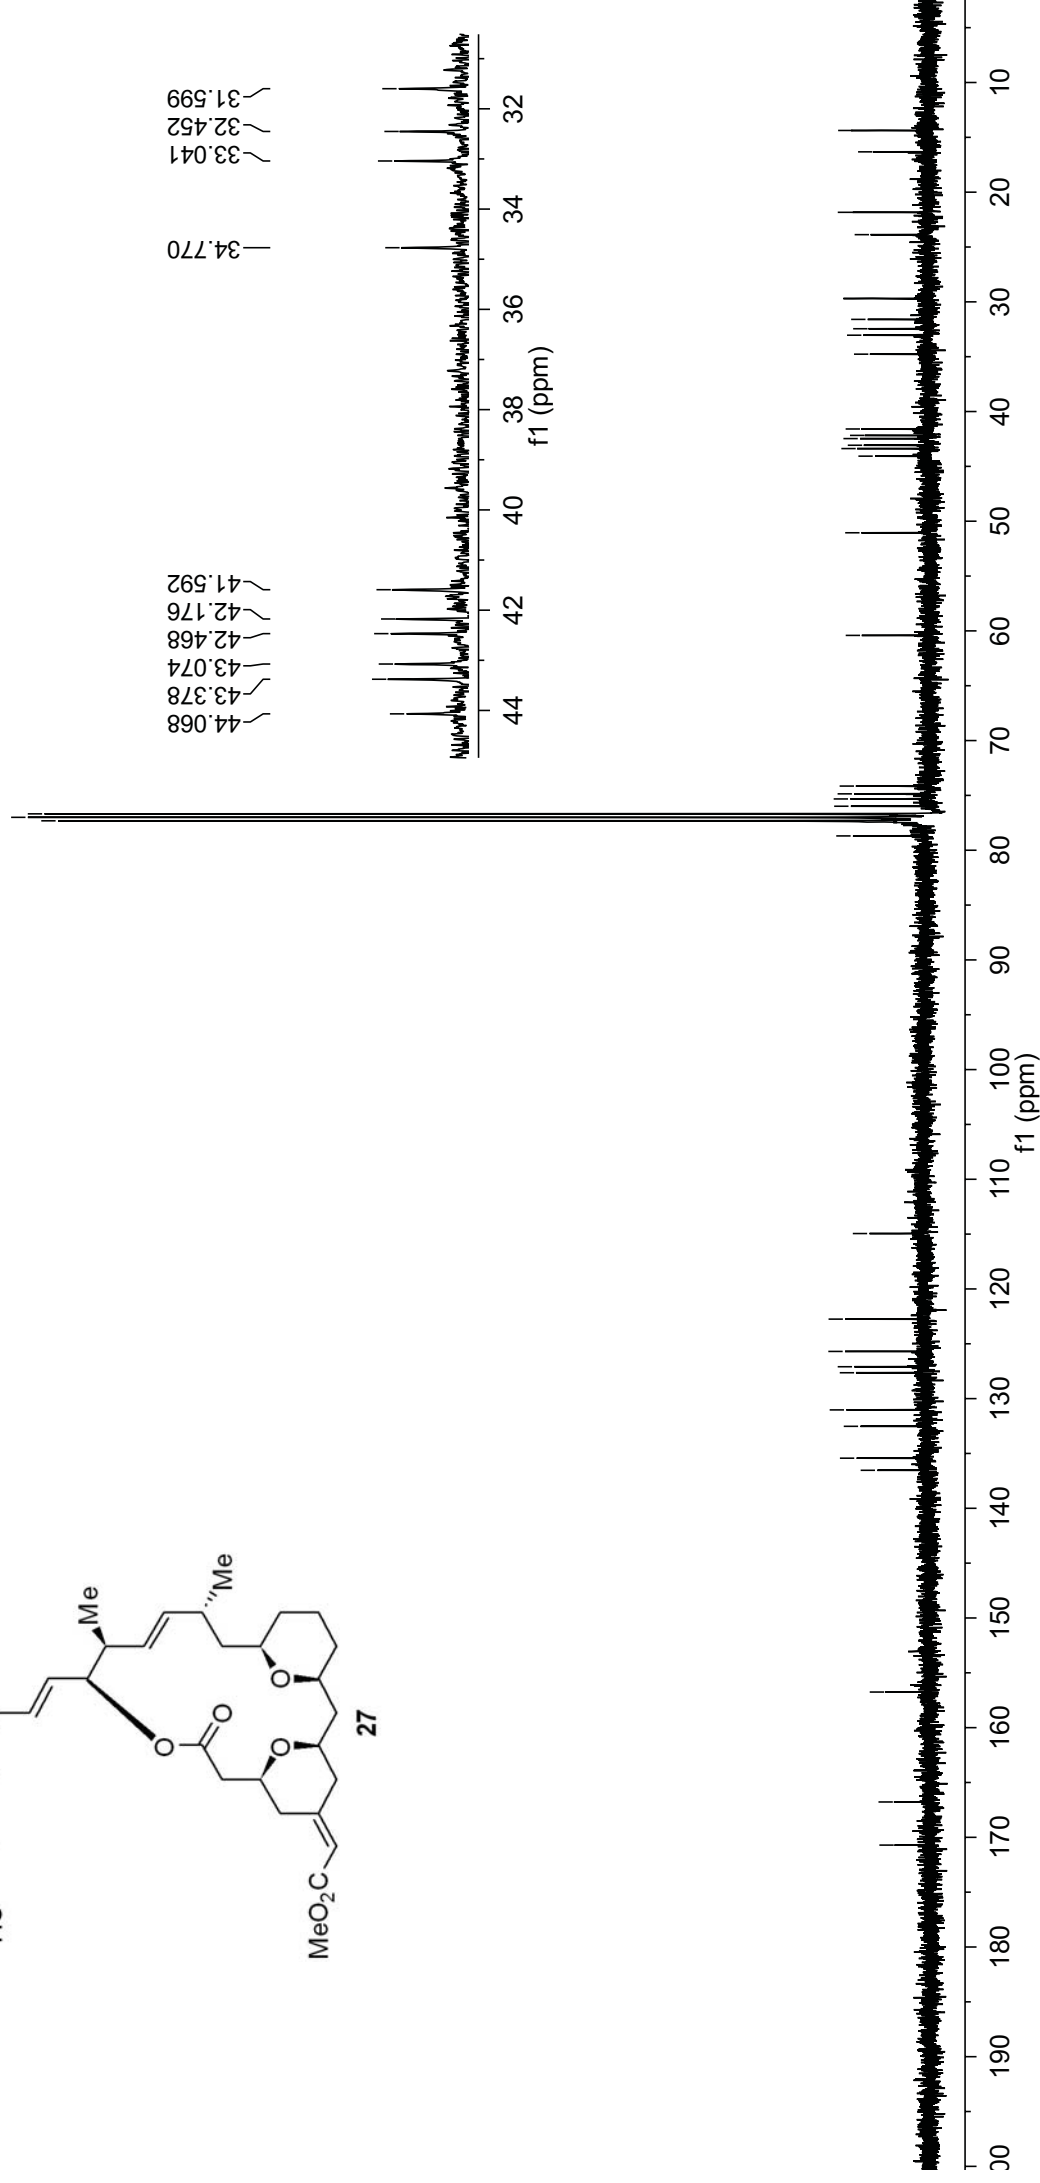

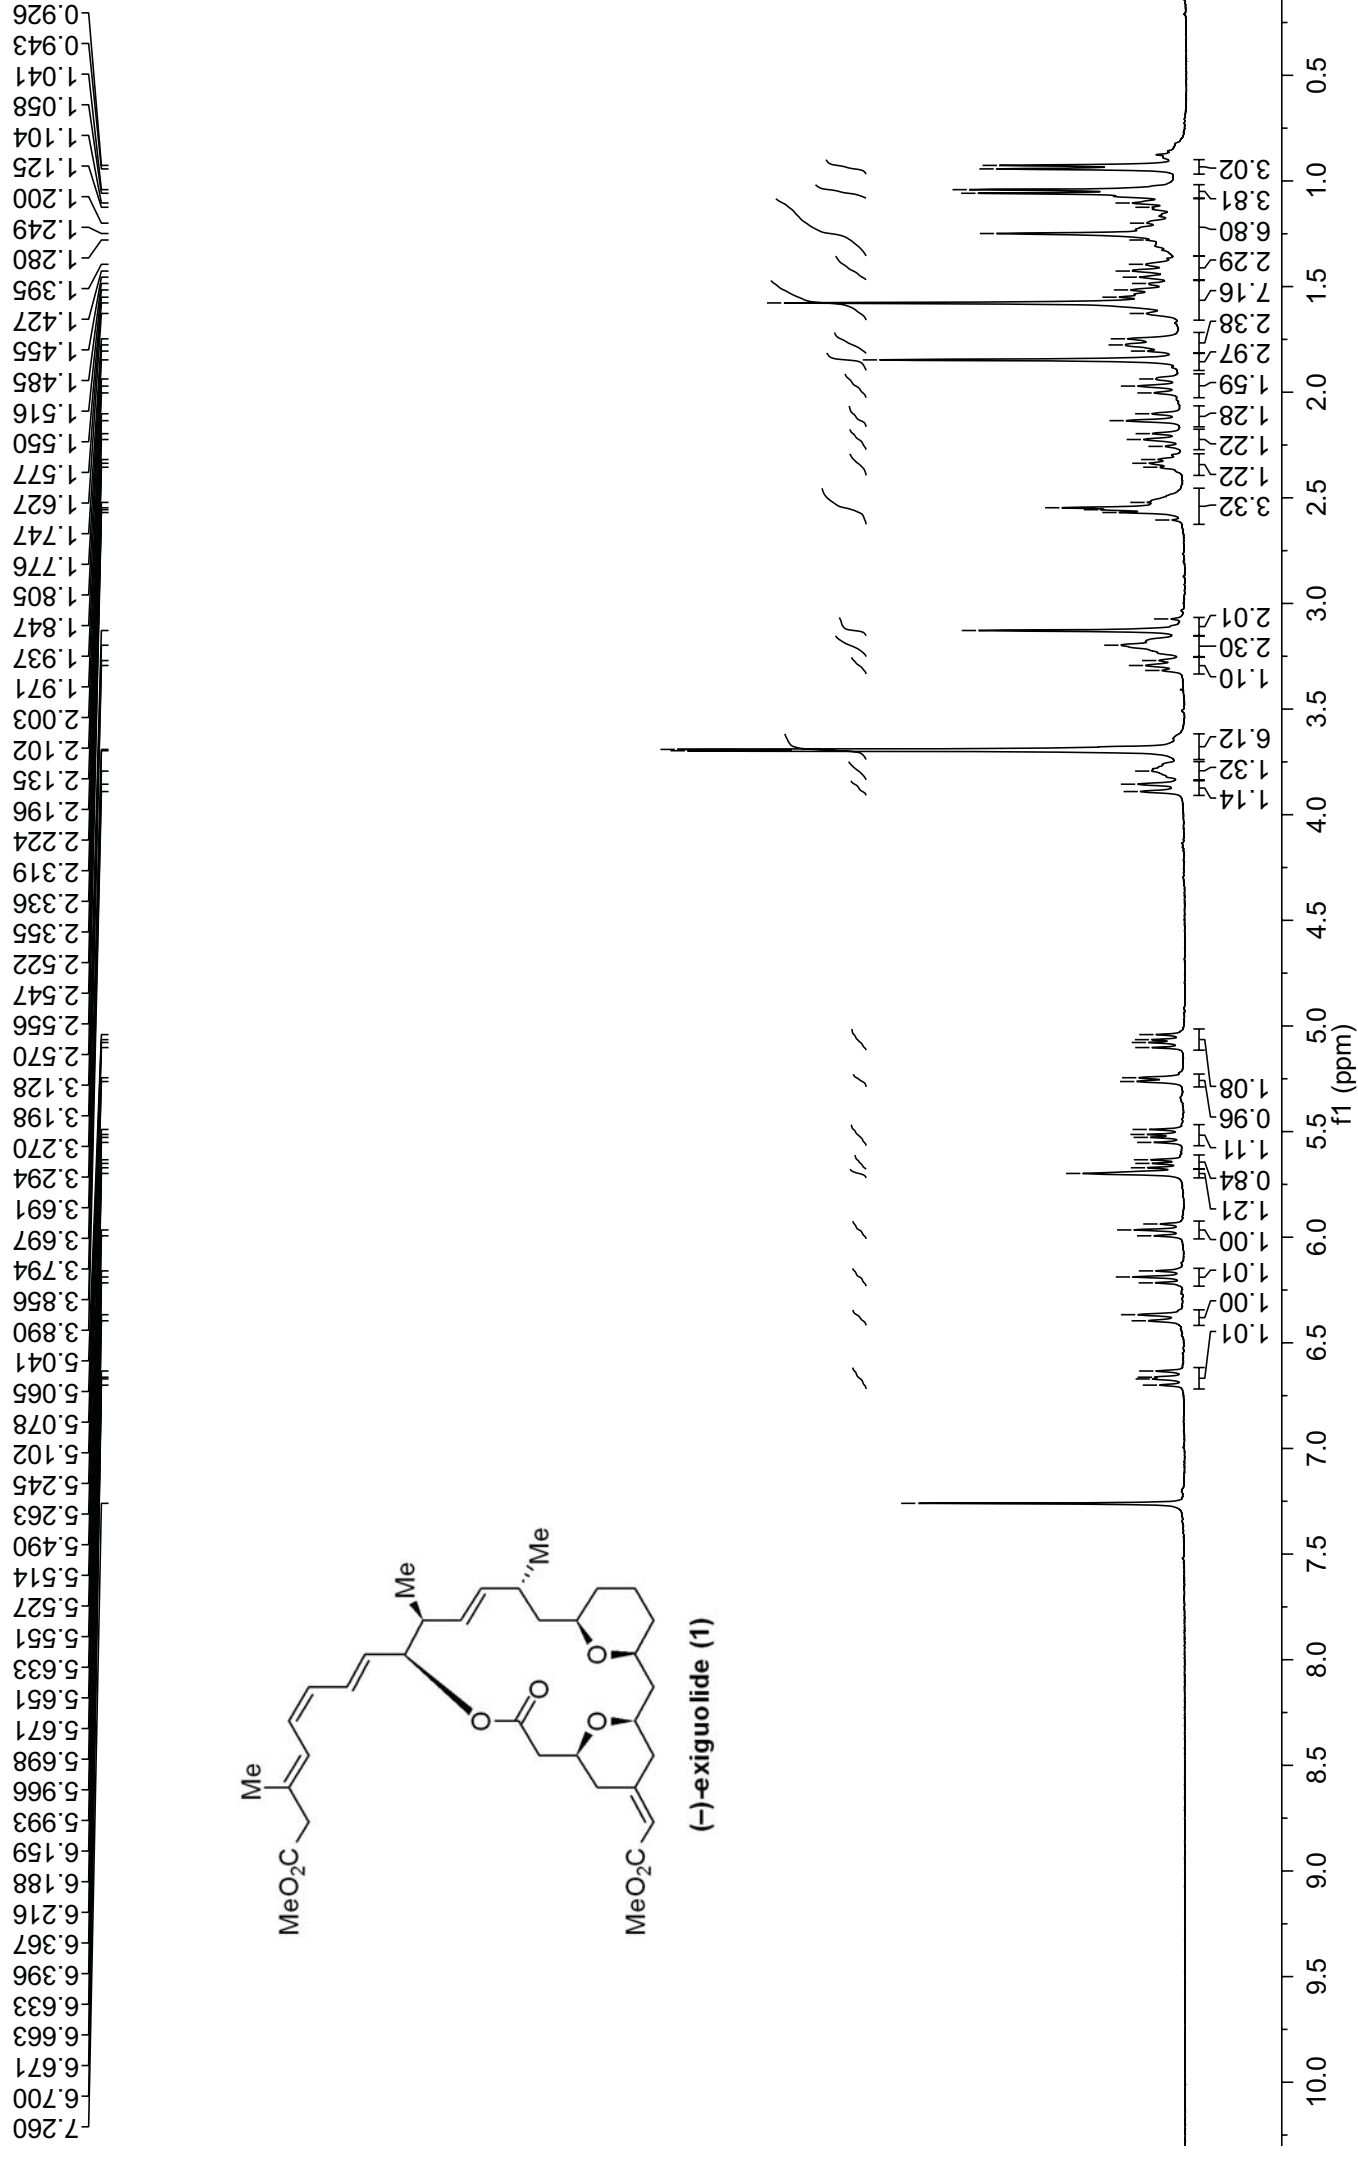

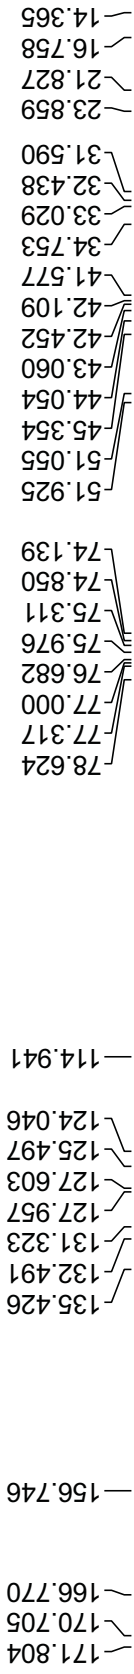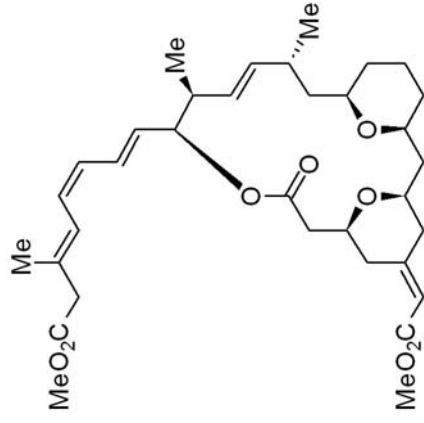

(-)-exiguolide (1)

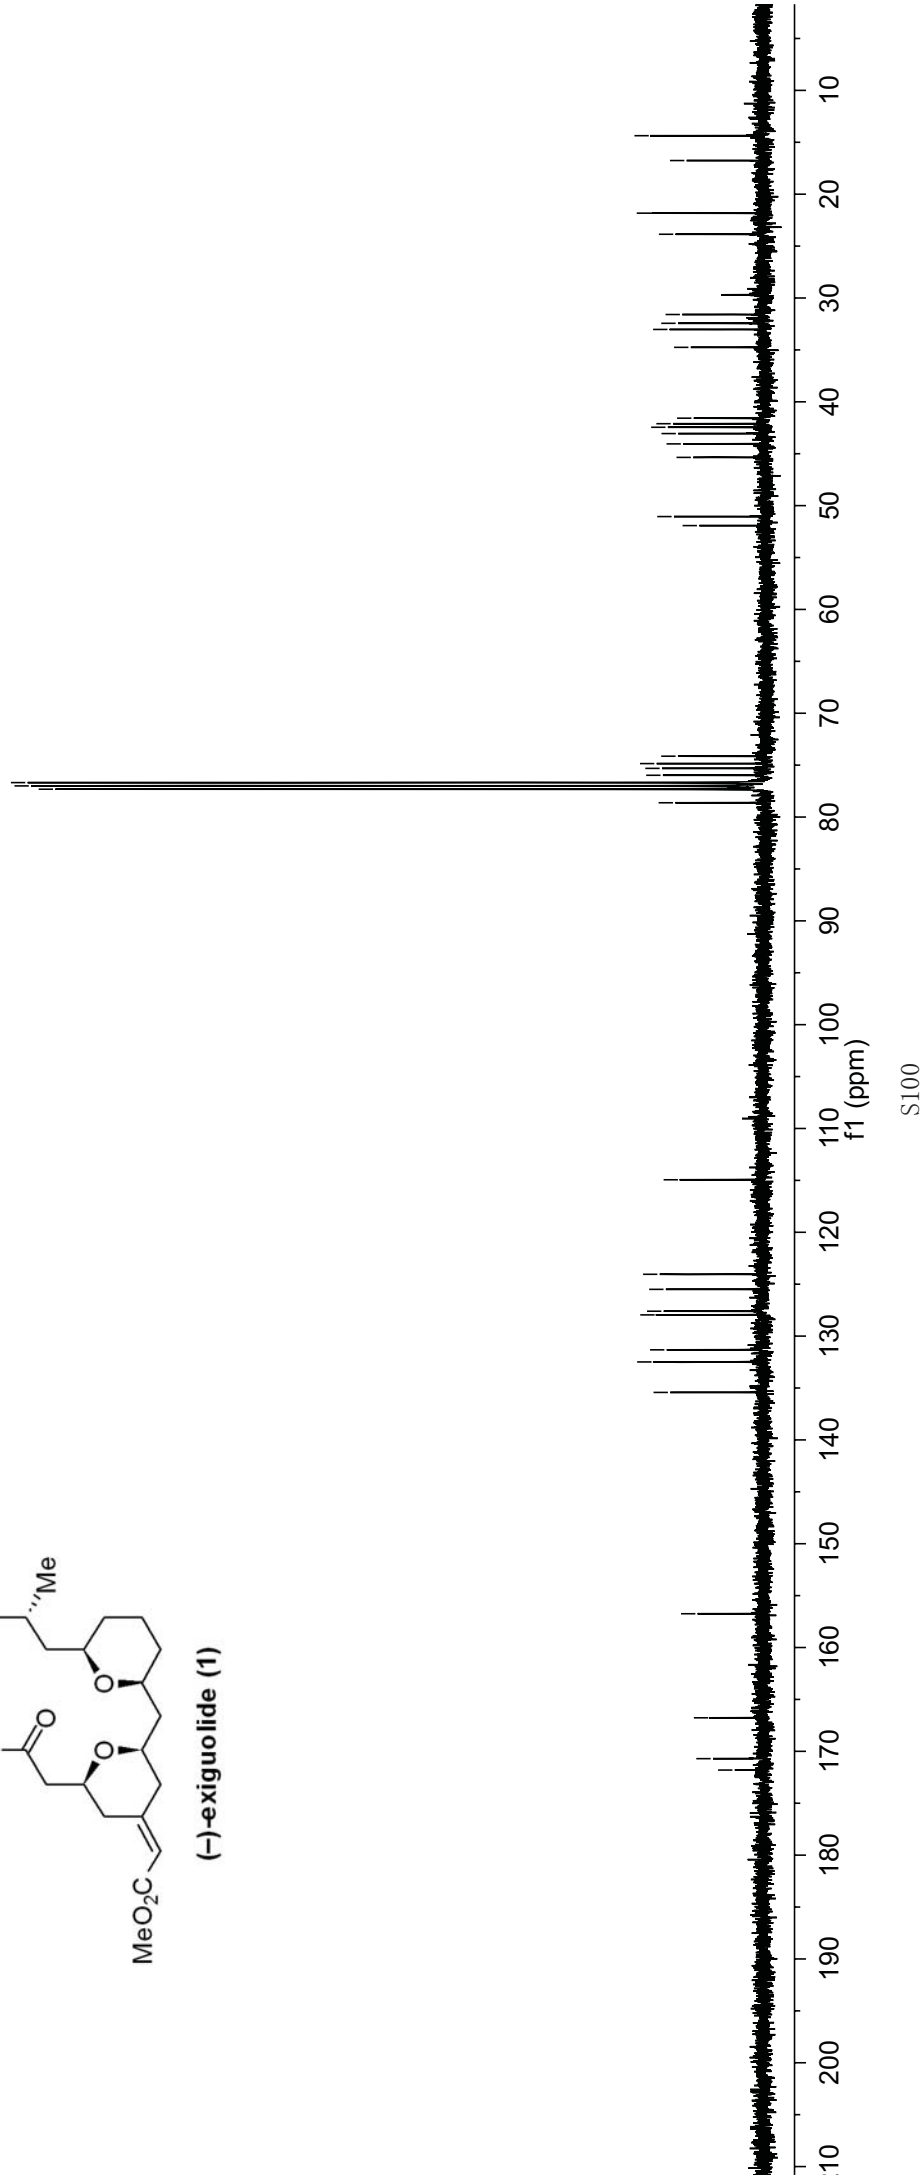

Supplement: c5cc02448j1.pdf [file c5cc02448j1.pdf]
